# Supplementary material for: Biofilm formation in enterococci: genotype-phenotype correlations and inhibition by vancomycin
Source: PubMed Central journal article supplement (PMC5515943; doi:10.1038/s41598-017-05901-0), 2017-07-18
Supplement: 41598_2017_5901_MOESM1_ESM.pdf [file 41598_2017_5901_MOESM1_ESM.pdf]

---

## Biofilm formation in enterococci: genotype-phenotype correlations and inhibition by vancomycin

---

Yomna A. Hashem<sup>1</sup>, Heba M. Amin<sup>2</sup>, Tamer M. Essam<sup>3</sup>, Aymen S. Yassin<sup>3</sup> and Ramy K. Aziz<sup>3</sup>

<sup>1</sup> Department of Microbiology and Immunology, Faculty of Pharmacy, British University in Egypt, Shorouk City, Egypt

<sup>2</sup> Department of Microbiology and Immunology, Faculty of Pharmacy, October University for Modern Sciences and Arts, 6 October City, Egypt

<sup>3</sup> Department of Microbiology and Immunology, Faculty of Pharmacy, Cairo University, Cairo, Egypt

### SUPPLEMENTARY INFORMATION

#### SUPPLEMENTARY FIGURES:

**Figure S1:** ERIC-PCR cladogram. A full cladogram representation of the UPGMA tree shown in radial format in Fig. 1

**Figure S2:** Gel-electrophoresis of PCR amplification products of different genes involved in biofilm formation

**Figure S3:** Congo Red assay for assessment of biofilm formation

**Figure S4:** Crystal Violet assay for assessment of biofilm formation

**Figure S5:** Gelatinase test (Gelatinase positive *Enterococcus* on gelatin agar)

#### SUPPLEMENTARY TABLES:

**Table S1:** Description of the isolates, their origins, sources, their biofilm phenotypes (Crystal Violet assay optical density and biofilm strength), and their gelatinase phenotype.

**Table S2:** SEED Subsystems Analysis of 192 enterococcal genomes for the presence of *agg*, *ace*, and the *fsr* locus genes (URL: <http://pubseed.theseed.org/?page=SubsystemSelect> ; subsystem deposited under the name: “Biofilm Formation in Enterococci”).

**Table S3:** Detailed SEED comparative genomic analysis of four *E. faecalis* genomes against *E. faecalis* V583 (URL: <http://pubseed.theseed.org/?page=MultiGenomeCompare> [http://pubseed.theseed.org/comp\\_genomes.cgi](http://pubseed.theseed.org/comp_genomes.cgi))

# Figure S1

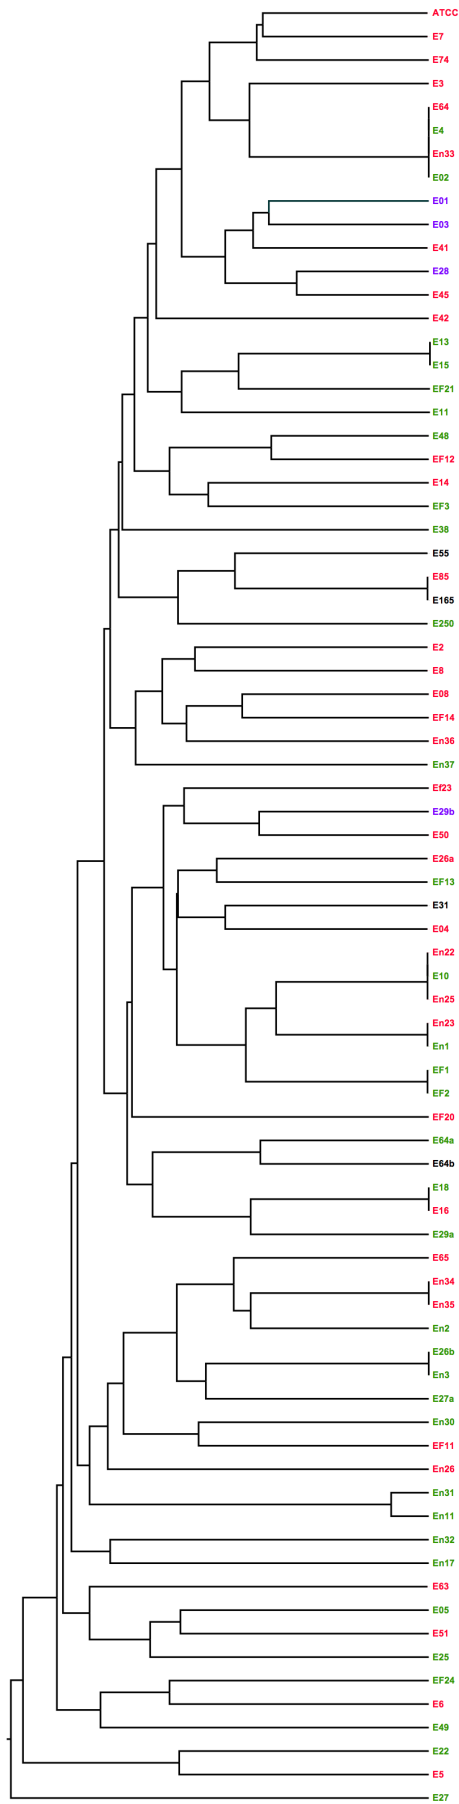

## ERIC-PCR Cladogram

# Figure S2

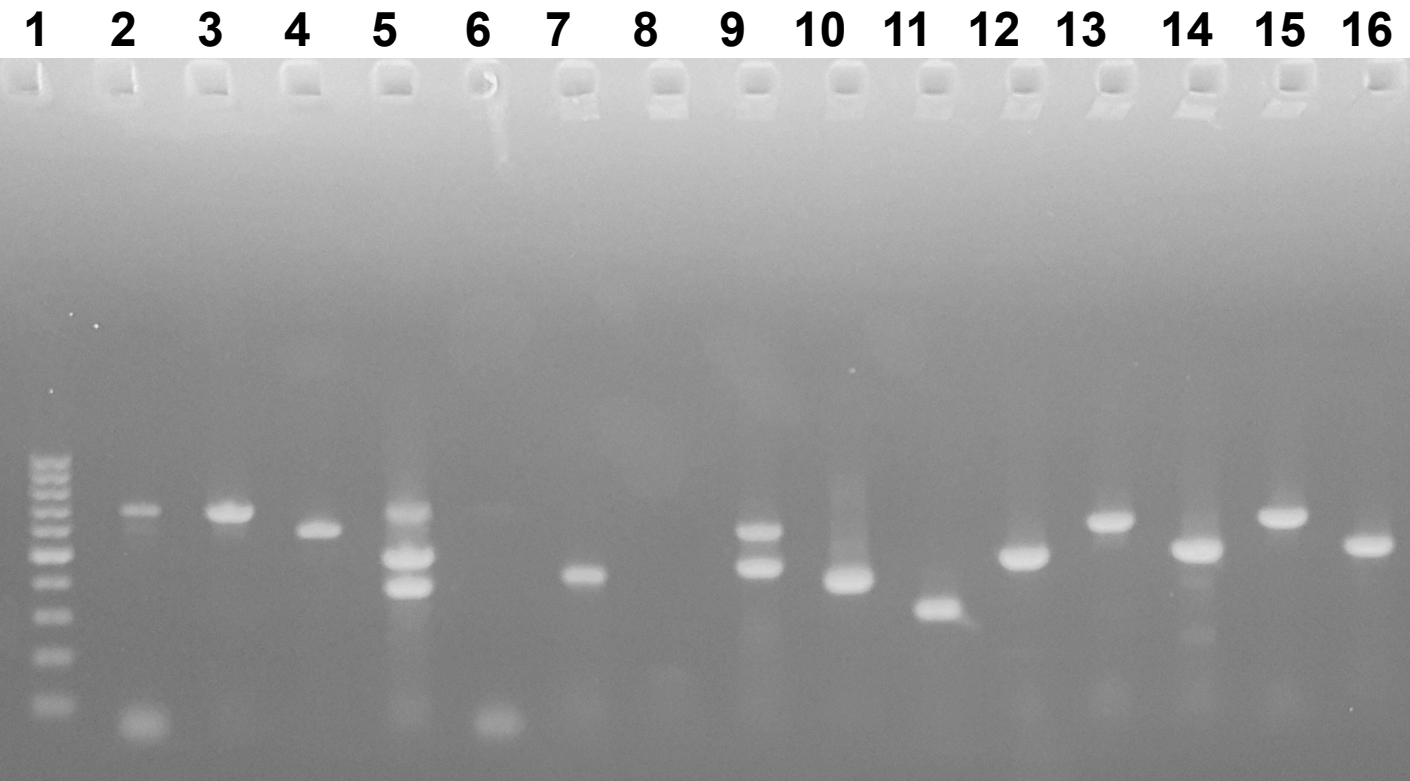

**Gel-electrophoresis of PCR amplification products of different genes involved in biofilm formation.** Lane 1: 100-bp DNA ladder, 2: *gelE*, lane 3: *efaA*, lane 4: *ace*, lane 5: *fsrC*, *ebpB* and *cob*, lane 7: *sprE*, lane 9: *pilA* and *fsrA*, lane 10: *agg*, lane 11: *bop*, lane 12: *cpd*, lane 13: *srt*, lane 14: *ebpC*, lane 15: *ebpA* and lane 16: *fsrB*.

# Figure S3

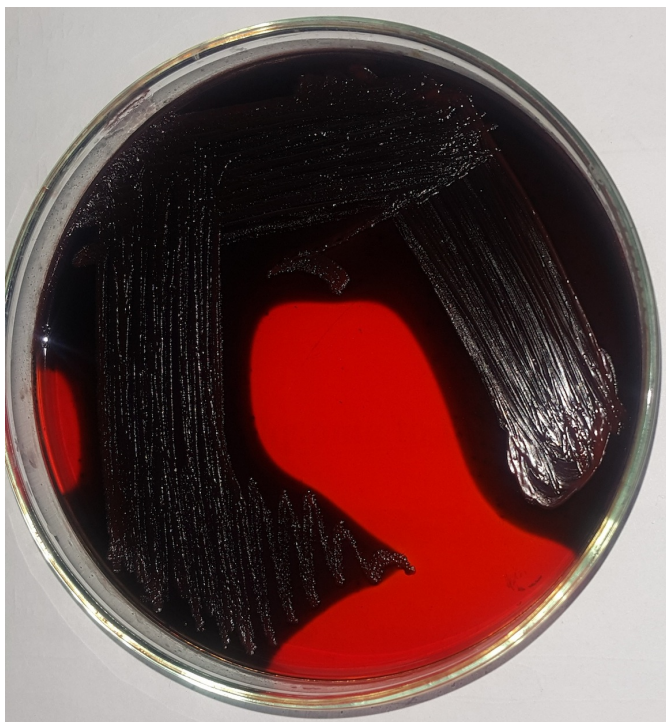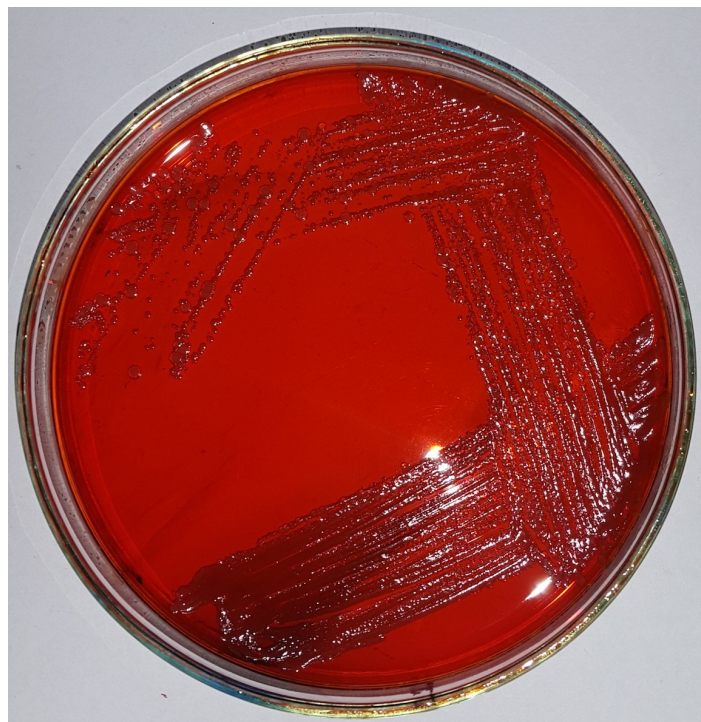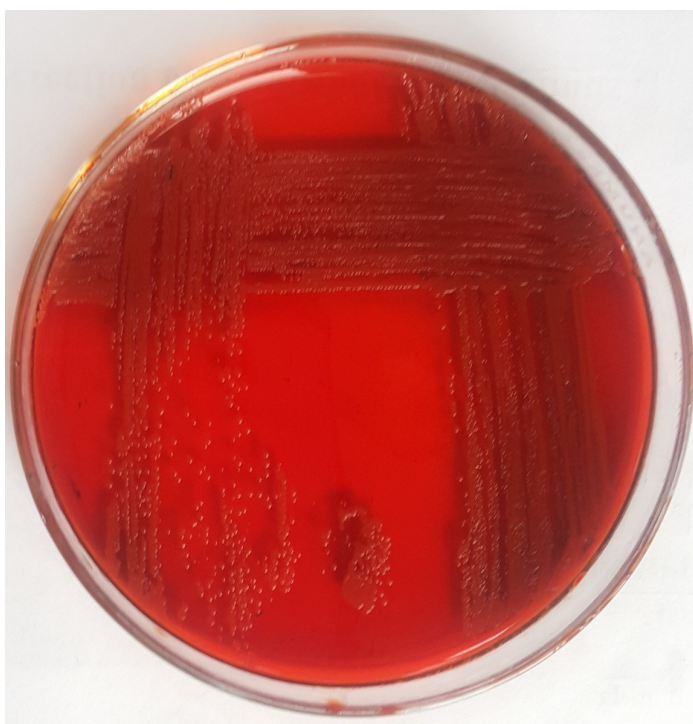

**Congo Red assay for assessment of biofilm formation. left: strong; right: intermediate; bottom: non-forming**



# Figure S4

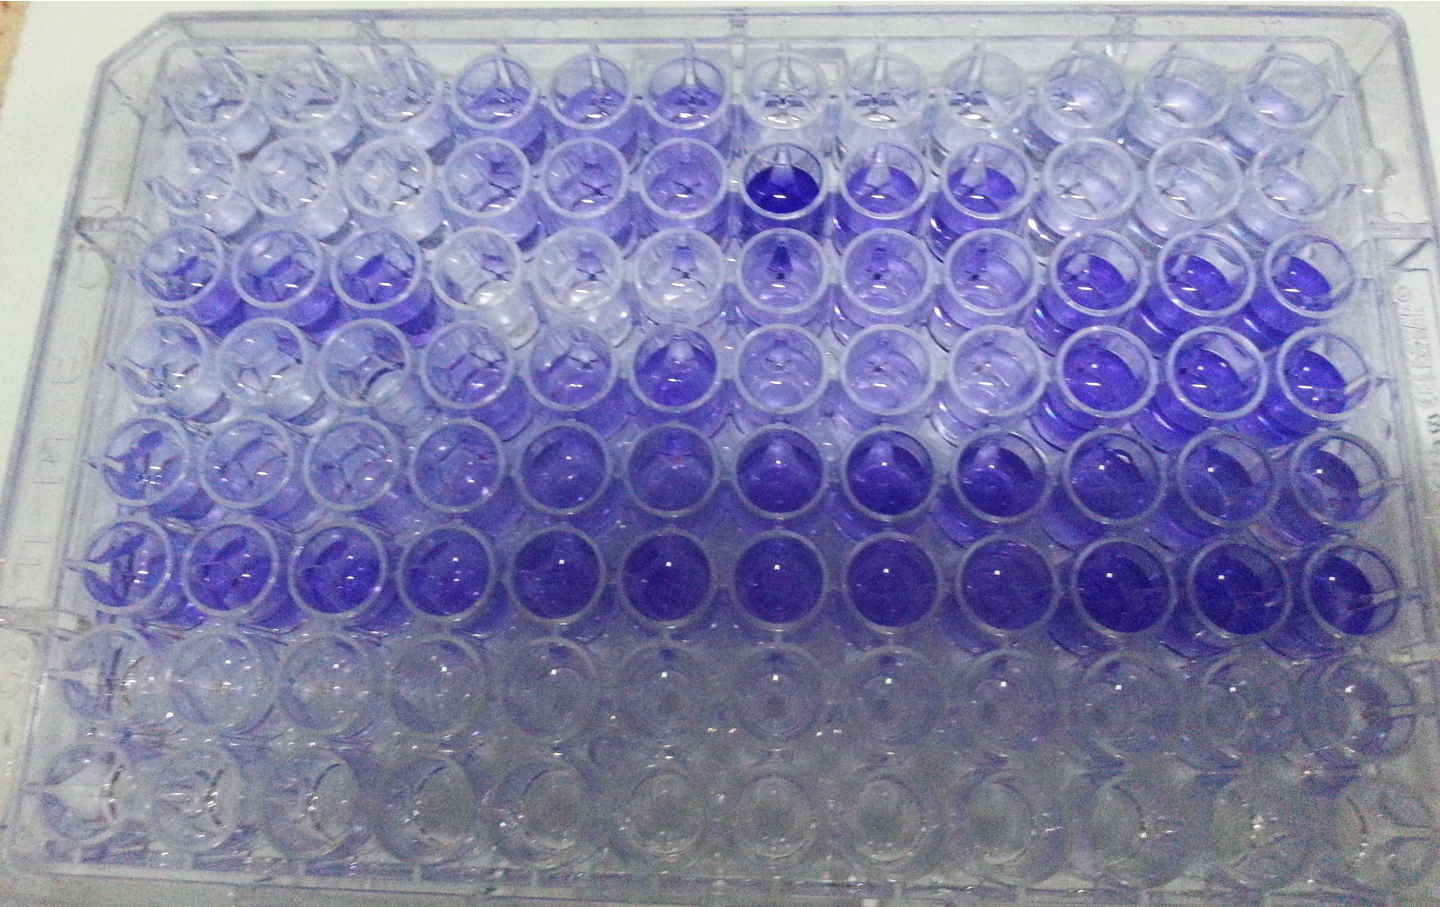

**Crystal Violet assay for assessment of biofilm formation**

# Figure S5

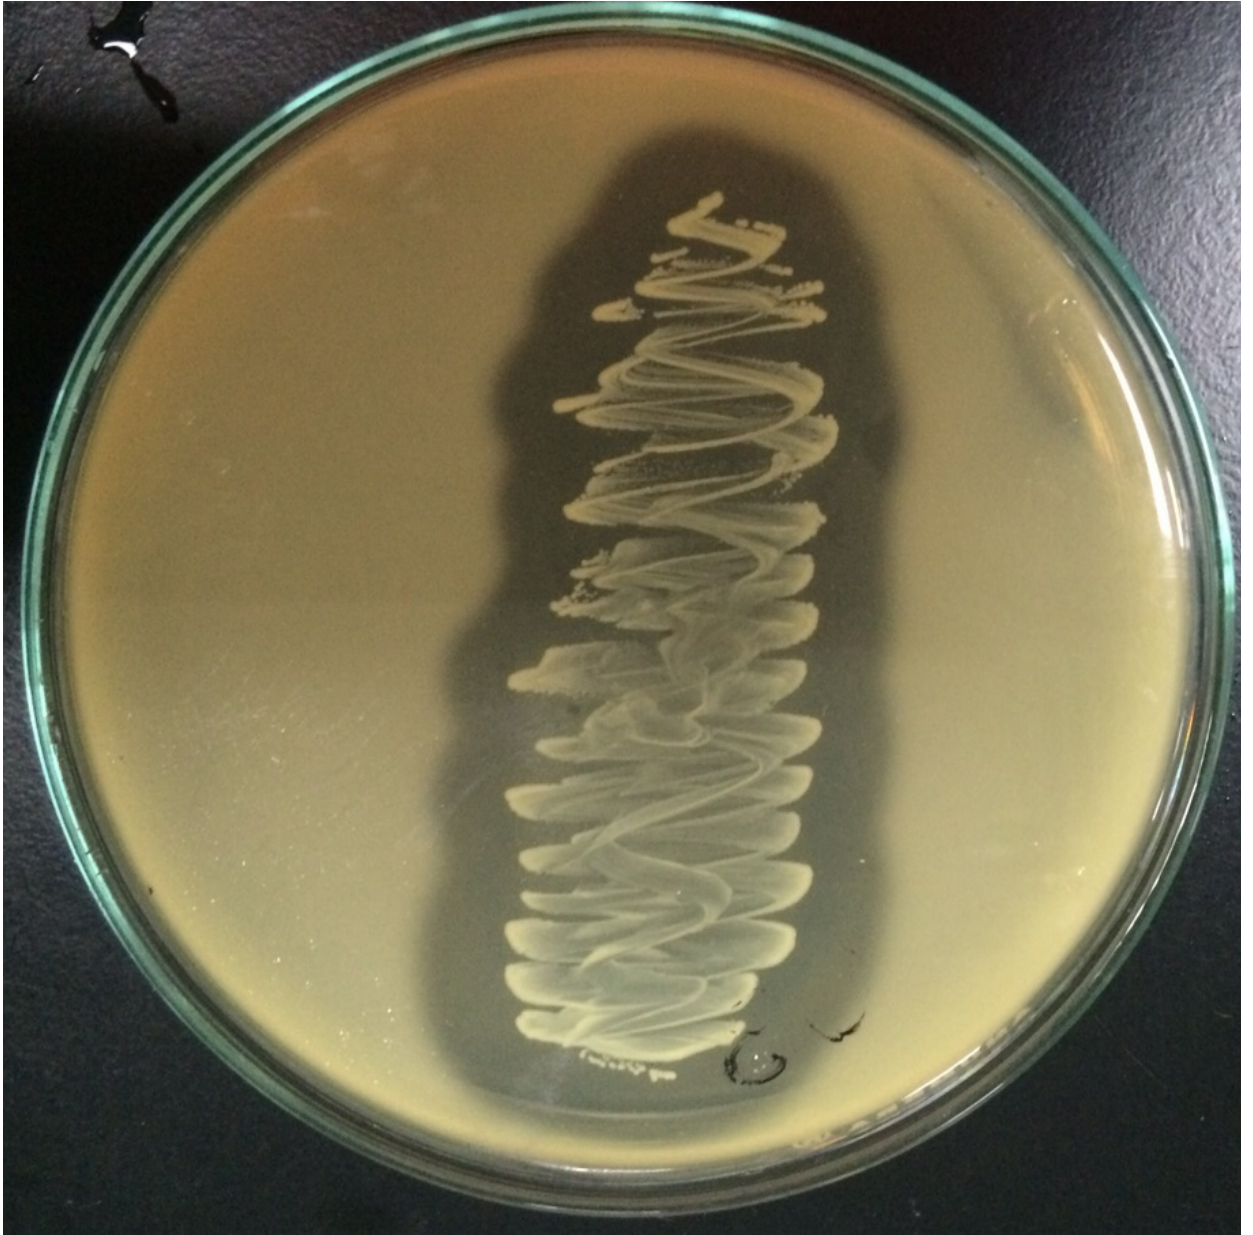

Gelatinase-positive *Enterococcus* on gelatin agar

**Table S1: Information about the 90 enterococcal isolates used in this study**

**Key:** S = strong, M = moderate, W = weak, N = non-forming; + = positive, - = negative

| Isolate | Source | Hospital/Lab      | Species            | Biofilm OD | Biofilm Strength | Gelatinase activity |
|---------|--------|-------------------|--------------------|------------|------------------|---------------------|
| E03     | urine  | AboulRish         | <i>E. faecalis</i> | 1.63       | S                | +                   |
| E01     | urine  | AboulRish         | <i>E. faecalis</i> | 1.62       | S                | +                   |
| E23a    | vagina | Elkasr El.Eini    | <i>E. faecalis</i> | 1.62       | S                | -                   |
| E28     | urine  | Elkasr El.Eini    | <i>E. faecalis</i> | 1.6        | S                | +                   |
| E29b    | urine  | Elkasr El.Eini    | <i>E. faecalis</i> | 1.6        | S                | +                   |
| ATCC    | urine  | NAMRU             | <i>E. faecalis</i> | 1.1        | M                | -                   |
| E74     | stool  | Elkasr El.Eini    | <i>E. faecalis</i> | 1.1        | M                | -                   |
| EF11    | urine  | AboulRish         | <i>E. faecalis</i> | 1.1        | M                | -                   |
| E50     | urine  | AboulRish         | <i>E. faecium</i>  | 1.09       | M                | -                   |
| E41     | urine  | AboulRish         | <i>E. faecalis</i> | 1.07       | M                | -                   |
| E26a    | urine  | Elkasr El.Eini    | <i>E. faecalis</i> | 1.06       | M                | +                   |
| E44     | urine  | AboulRish         | <i>E. faecalis</i> | 1          | M                | -                   |
| E63     | urine  | Elkasr El.Eini    | <i>E. faecalis</i> | 1          | M                | -                   |
| EF20    | urine  | AboulRish         | <i>E. faecalis</i> | 1          | M                | -                   |
| En35    | urine  | El-Monira         | <i>E. faecium</i>  | 1          | M                | -                   |
| En34    | urine  | El-Monira         | <i>E. faecium</i>  | 0.99       | M                | -                   |
| E14     | urine  | AboulRish         | <i>E. faecalis</i> | 0.98       | M                | -                   |
| E3      | urine  | AboulRish         | <i>E. faecalis</i> | 0.97       | M                | -                   |
| En14    | urine  | El-Monira         | <i>E. faecalis</i> | 0.97       | M                | -                   |
| En23    | urine  | El-Monira         | <i>E. faecium</i>  | 0.96       | M                | -                   |
| E64     | stool  | Elkasr El.Eini    | <i>E. faecalis</i> | 0.95       | M                | -                   |
| En22    | urine  | El-Monira         | <i>E. faecalis</i> | 0.95       | M                | -                   |
| En25    | urine  | El-Monira         | <i>E. faecium</i>  | 0.94       | M                | -                   |
| EF12    | urine  | AboulRish         | <i>E. faecalis</i> | 0.93       | M                | -                   |
| E16     | dental | MSA dental clinic | <i>E. faecalis</i> | 0.92       | M                | -                   |
| En26    | urine  | El-Monira         | <i>E. faecalis</i> | 0.92       | M                | -                   |
| E5      | stool  | Elkasr El.Eini    | <i>E. faecium</i>  | 0.91       | M                | -                   |
| En36    | urine  | El-Monira         | <i>E. faecalis</i> | 0.91       | M                | +                   |
| E8      | stool  | Elkasr El.Eini    | <i>E. faecalis</i> | 0.9        | M                | +                   |
| En33    | urine  | El-Monira         | <i>E. faecalis</i> | 0.9        | M                | +                   |
| E6      | urine  | AboulRish         | <i>E. faecalis</i> | 0.89       | M                | +                   |
| E7      | stool  | Elkasr El.Eini    | <i>E. faecalis</i> | 0.89       | M                | +                   |
| E08     | urine  | AboulRish         | <i>E. faecium</i>  | 0.86       | M                | +                   |
| EF14    | urine  | AboulRish         | <i>E. faecalis</i> | 0.86       | M                | -                   |
| EF23    | urine  | AboulRish         | <i>E. faecalis</i> | 0.8        | M                | -                   |
| E51     | urine  | AboulRish         | <i>E. faecalis</i> | 0.79       | M                | -                   |
| E04     | urine  | AboulRish         | <i>E. faecalis</i> | 0.77       | M                | +                   |
| E32     | urine  | AboulRish         | <i>E. faecalis</i> | 0.75       | M                | -                   |
| E85     | dental | MSA dental clinic | <i>E. faecium</i>  | 0.74       | M                | -                   |
| E2      | urine  | AboulRish         | <i>E. faecalis</i> | 0.73       | M                | -                   |
| E65     | urine  | AboulRish         | <i>E. faecalis</i> | 0.71       | M                | -                   |
| E42     | urine  | AboulRish         | <i>E. faecalis</i> | 0.69       | M                | -                   |
| E45     | urine  | Elkasr El.Eini    | <i>E. faecalis</i> | 0.68       | M                | +                   |
| En27    | urine  | El-Monira         | <i>E. faecalis</i> | 0.61       | W                | -                   |
| E05     | urine  | AboulRish         | <i>E. faecalis</i> | 0.6        | W                | -                   |
| E18     | urine  | Elkasr El.Eini    | <i>E. faecalis</i> | 0.6        | W                | -                   |
| E25     | urine  | AboulRish         | <i>E. faecalis</i> | 0.6        | W                | -                   |
| E26b    | pus    | Elkasr El.Eini    | <i>E. faecalis</i> | 0.6        | W                | +                   |
| E22     | urine  | Elkasr El.Eini    | <i>E. faecalis</i> | 0.59       | W                | -                   |
| E38     | urine  | Elkasr El.Eini    | <i>E. faecalis</i> | 0.59       | W                | -                   |
| EF3     | blood  | Elkasr El.Eini    | <i>E. faecium</i>  | 0.58       | W                | -                   |
| E29a    | urine  | Elkasr El.Eini    | <i>E. faecalis</i> | 0.54       | W                | +                   |
| EF2     | blood  | AboulRish         | <i>E. faecalis</i> | 0.53       | W                | -                   |
| En16    | urine  | El-Monira         | <i>E. faecalis</i> | 0.52       | W                | -                   |
| En30    | urine  | El-Monira         | <i>E. faecium</i>  | 0.51       | W                | -                   |

Total Cases 90  
Number of Categories 4

| Group                   | Count | %     |
|-------------------------|-------|-------|
| <i>E. faecalis</i>      | 65    | 72.22 |
| <i>E. faecium</i>       | 22    | 24.44 |
| <i>E. casseliflavus</i> | 2     | 2.22  |
| <i>E. gallinarum</i>    | 1     | 1.11  |



|             |        |                   |                         |      |   |   |
|-------------|--------|-------------------|-------------------------|------|---|---|
| <b>En31</b> | urine  | El-Monira         | <i>E. faecalis</i>      | 0.51 | W | - |
| <b>E20</b>  | urine  | AboulRish         | <i>E. casseliflavus</i> | 0.5  | W | - |
| <b>En17</b> | urine  | El-Monira         | <i>E. faecalis</i>      | 0.5  | W | - |
| <b>EF22</b> | urine  | AboulRish         | <i>E. faecalis</i>      | 0.49 | W | - |
| <b>E48</b>  | urine  | Elkasr El.Eini    | <i>E. faecium</i>       | 0.48 | W | + |
| <b>En11</b> | urine  | El-Monira         | <i>E. faecalis</i>      | 0.48 | W | - |
| <b>En32</b> | urine  | El-Monira         | <i>E. faecalis</i>      | 0.48 | W | - |
| <b>E11</b>  | urine  | AboulRish         | <i>E. faecalis</i>      | 0.47 | W | + |
| <b>E49</b>  | urine  | AboulRish         | <i>E. faecium</i>       | 0.47 | W | - |
| <b>EF24</b> | urine  | AboulRish         | <i>E. faecalis</i>      | 0.47 | W | + |
| <b>En20</b> | urine  | El-Monira         | <i>E. gallinarum</i>    | 0.47 | W | - |
| <b>E02</b>  | urine  | AboulRish         | <i>E. faecalis</i>      | 0.46 | W | + |
| <b>E64a</b> | stool  | Elkasr El.Eini    | <i>E. faecalis</i>      | 0.46 | W | + |
| <b>EF21</b> | urine  | AboulRish         | <i>E. faecalis</i>      | 0.45 | W | + |
| <b>En10</b> | urine  | El-Monira         | <i>E. faecalis</i>      | 0.45 | W | - |
| <b>En2</b>  | urine  | El-Monira         | <i>E. faecium</i>       | 0.45 | W | - |
| <b>En37</b> | urine  | El-Monira         | <i>E. faecium</i>       | 0.45 | W | - |
| <b>E10</b>  | urine  | Elkasr El.Eini    | <i>E. faecalis</i>      | 0.44 | W | - |
| <b>E15</b>  | urine  | AboulRish         | <i>E. casseliflavus</i> | 0.44 | W | - |
| <b>EF1</b>  | blood  | AboulRish         | <i>E. faecalis</i>      | 0.44 | W | - |
| <b>En3</b>  | urine  | El-Monira         | <i>E. faecalis</i>      | 0.44 | W | - |
| <b>E27</b>  | bile   | Elkasr El.Eini    | <i>E. faecalis</i>      | 0.43 | W | - |
| <b>E27a</b> | bile   | Elkasr El.Eini    | <i>E. faecium</i>       | 0.43 | W | - |
| <b>EF25</b> | urine  | AboulRish         | <i>E. faecalis</i>      | 0.43 | W | - |
| <b>E250</b> | blood  | AboulRish         | <i>E. faecalis</i>      | 0.42 | W | + |
| <b>E13</b>  | urine  | Elkasr El.Eini    | <i>E. faecalis</i>      | 0.41 | W | + |
| <b>E26</b>  | pus    | Elkasr El.Eini    | <i>E. faecium</i>       | 0.41 | W | + |
| <b>En1</b>  | urine  | El-Monira         | <i>E. faecium</i>       | 0.41 | W | - |
| <b>En9</b>  | urine  | El-Monira         | <i>E. faecium</i>       | 0.41 | W | - |
| <b>E4</b>   | urine  | AboulRish         | <i>E. faecalis</i>      | 0.4  | W | - |
| <b>EF13</b> | blood  | AboulRish         | <i>E. faecium</i>       | 0.4  | W | - |
| <b>E165</b> | dental | MSA dental clinic | <i>E. faecium</i>       | 0.3  | N | - |
| <b>E31</b>  | stool  | Elkasr El.Eini    | <i>E. faecium</i>       | 0.3  | N | - |
| <b>E55</b>  | stool  | Elkasr El.Eini    | <i>E. faecium</i>       | 0.3  | N | - |
| <b>E64b</b> | stool  | Elkasr El.Eini    | <i>E. faecalis</i>      | 0.3  | N | - |



**Table S2:**

#Subsystem: Biofilm Formation in Enterococci  
 #SEED Subsystems Analysis (URL: <http://pubseed.theseed.org/?page=SubsystemSelect>)  
 #Genomes in Fig. 2 are in bold and are boxed  
 #Numbers in cells reflect gene order in the analyzed genome

| Serial # | Organism: Strain name (Genome ID)               | Variant Code | Protein-coding genes                     |            |             |             |             |             | Pattern |                        |
|----------|-------------------------------------------------|--------------|------------------------------------------|------------|-------------|-------------|-------------|-------------|---------|------------------------|
|          |                                                 |              | <i>agg</i>                               | <i>ace</i> | <i>gelE</i> | <i>sprE</i> | <i>fsrA</i> | <i>fsrB</i> |         | <i>fsrC</i>            |
| 1        | Enterococcus faecalis B1441 (1157342.3)         | 1            | 464                                      | 1066       | 1756        | 1755        | 1754        | 1753        | 1752    | a0100101101101101101   |
| 2        | Enterococcus faecalis B4638 (1157408.3)         | 1            | 465                                      | 1055       | 1746        | 1745        | 1744        | 1743        | 1742    | a0100101101101101101   |
| 3        | Enterococcus faecalis B4270 (1157405.3)         | 1            | 437                                      | 1040       | 1731        | 1730        | 1729        | 1728        | 1727    | a0100101101101101101   |
| 4        | Enterococcus faecalis B878 (1157366.3)          | 1            | 438                                      | 1038       | 1727        | 1726        | 1725        | 1724        | 1723    | a0100101101101101101   |
| 5        | Enterococcus faecalis B939 (1157367.3)          | 1            | 463                                      | 1046       | 1737        | 1736        | 1735        | 1734        | 1733    | a0100101101101101101   |
| 6        | Enterococcus faecalis B4259 (1157403.3)         | 1            | 471                                      | 1162       | 1852        | 1851        | 1850        | 1849        | 1848    | a0100101101101101101   |
| 7        | <b>Enterococcus faecalis V583 (226185.1)</b>    | 1            | 138, 3154, 3213, 452                     | 1014       | 1704        | 1703        | 1702        | 1701        | 1700    | a0400101101101101101   |
| 8        | Enterococcus faecalis V583 (226185.9)           | 1            | 136, 3144, 3197, 446                     | 1026       | 1711        | 1710        | 1709        | 1708        | 1707    | a0400101101101101101   |
| 9        | Enterococcus faecalis B4163 (1157402.3)         | 1            | 798                                      | 1470       | 2160        | 2159        | 2158        | 2157        | 2156    | a0100101101101101101   |
| 10       | Enterococcus faecalis B4148 (1157401.3)         | 1            | 467                                      | 1122       | 1812        | 1811        | 1810        | 1809        | 1808    | a0100101101101101101   |
| 11       | Enterococcus faecalis UAA1489 (1158976.3)       | 1            | 505                                      | 1079       | 1850        | 1849        | 1848        | 1847        | 1846    | a0100101101101101101   |
| 12       | Enterococcus faecalis AR01/DG (565651.6)        | 1            | 2539                                     | 2297       | 382         | 381         | 380         | 379         | 378     | a0100101101101101101   |
| 13       | Enterococcus faecalis DS16 (1158677.3)          | 1            | 2719                                     | 921        | 1558        | 1557        | 1556        | 1555        | 1554    | a0100101101101101101   |
| 14       | Enterococcus faecalis TX4248 (749495.4)         | 1            | 581                                      | 869        | 1444        | 1445        | 1446        | 1447        | 1448    | a0100101101101101101   |
| 15       | Enterococcus faecalis B4008 (1157399.3)         | 1            | 471                                      | 1149       | 1840        | 1839        | 1838        | 1837        | 1836    | a0100101101101101101   |
| 16       | Enterococcus faecalis HH22 (491075.3)           | 1            | 2432, 2437, 2903, 2904, 2905, 2908, 2909 | 252        | 663         | 662         | 2913        | 661         | 660     | a5220101030103103103   |
| 17       | Enterococcus faecalis B2949 (1157394.3)         | 1            | 544                                      | 1099       | 1789        | 1788        | 1787        | 1786        | 1785    | a0100101101101101101   |
| 18       | Enterococcus faecalis B2211 (1157385.3)         | 1            | 470                                      | 1138       | 1829        | 1828        | 1827        | 1826        | 1825    | a0100101101101101101   |
| 19       | Enterococcus faecalis B69486 (1151189.3)        | 1            | 2157, 2307                               | 1658       | 951         | 952         | 953         | 954         | 955     | a0200101101101101101   |
| 20       | Enterococcus faecalis B1505 (1157343.3)         | 1            | 3197, 3219                               | 1048       | 1739        | 1738        | 1737        | 1736        | 1735    | a0200101101101101101   |
| 21       | Enterococcus faecalis JH1 (565648.4)            | 1            | 2781                                     | 635        | 1576        | 1575        | 1574        | 1573        | 1572    | a0100101101101101101   |
| 22       | Enterococcus faecalis B2864 (1157392.3)         | 1            | 464                                      | 1062       | 1753        | 1752        | 1751        | 1750        | 1749    | a0100101101101101101   |
| 23       | Enterococcus faecalis TX0645 (749510.3)         | 1            | 1521                                     | 2432       | 554         | 553         | 552         | 551         | 550     | a0100101101101101101   |
| 24       | Enterococcus faecalis B2687 (1157389.3)         | 1            | 3168, 3237, 776                          | 1384       | 2075        | 2074        | 2073        | 2072        | 2071    | a0300101101101101101   |
| 25       | Enterococcus faecalis TX0635 (749509.3)         | 1            | 780                                      | 1308       | 1256        | 1255        | 1254        | 1253        | 1252    | a0100101101101101101   |
| 26       | Enterococcus faecalis SF19 (1158629.3)          | 1            | 426                                      | 1090       | 1783        | 1782        | 1781        | 1780        | 1779    | a0100101101101101101   |
| 27       | Enterococcus faecalis B2488 (1157357.3)         | 1            | 3191, 3237, 464, 468                     | 1054       | 1745        | 1744        | 1743        | 1742        | 1741    | a0400101101101101101   |
| 28       | Enterococcus faecalis B1618 (1157346.3)         | 1            | 3189, 463                                | 1065       | 1756        | 1755        | 1754        | 1753        | 1752    | a0200101101101101101   |
| 29       | Enterococcus faecalis TX0309B (749504.3)        | 1            | 1411                                     | 2541       | 284         | 285         | 286         | 287         | 288     | a0100101101101101101   |
| 30       | Enterococcus faecalis TX0309A (749503.3)        | 1            | 664                                      | 323        | 2138        | 2139        | 2140        | 2141        | 2142    | a0100101101101101101   |
| 31       | Enterococcus faecalis SS-6 (1158621.3)          | 1            | 287                                      | 1061       | 1760        | 1759        | 1758        | 1757        | 1756    | a0100101101101101101   |
| 32       | Enterococcus faecalis TX0104 (491074.3)         | 1            | 2320, 2963                               | 478        | 451         | 450         | 2969        | 449         | 448     | a0200101101101101101   |
| 33       | Enterococcus faecalis T1 (565636.4)             | 1            | 2724                                     | 2282       | 1552        | 1553        | 1554        | 1555        | 1556    | a0100101101101101101   |
| 34       | Enterococcus faecalis TX0031 (749499.3)         | 1            | 166                                      | 844        | 1976        | 1977        | 1978        | 1979        | 1980    | a0100101101101101101   |
| 35       | Enterococcus faecalis T11 (565640.5)            | 1            | 2514                                     | 2018       | 1303        | 1302        | 1301        | 1300        | 1299    | a0100101101101101101   |
| 36       | Enterococcus faecalis B1385 (1151212.3)         | 1            | 2636                                     | 2035       | 1345        | 1346        | 1347        | 1348        | 1349    | a0100101101101101101   |
| 37       | Enterococcus faecalis B4018 (1157400.3)         | 1.1          | 469                                      | 1799       | 1798        | 1797        | 1796        | 1795        | 1794    | a010000101101101101101 |
| 38       | Enterococcus faecalis B1719 (1157350.3)         | 1.1          | 3154, 3173                               | 1770       | 1770        | 1769        | 1768        | 1767        | 1766    | a020000101101101101101 |
| 39       | Enterococcus faecalis B1734 (1157351.3)         | 1.1          | 464                                      | 1757       | 1756        | 1755        | 1754        | 1753        | 1752    | a010000101101101101101 |
| 40       | Enterococcus faecalis TR161 (1169314.3)         | 1.1          | 501                                      | 1775       | 1774        | 1773        | 1772        | 1771        | 1770    | a010000101101101101101 |
| 41       | Enterococcus faecalis B1843 (1157352.3)         | 1.1          | 467                                      | 1756       | 1755        | 1754        | 1753        | 1752        | 1751    | a010000101101101101101 |
| 42       | Enterococcus faecalis CH19 (1158627.3)          | 1.1          | 285                                      | 1706       | 1705        | 1704        | 1703        | 1702        | 1701    | a010000101101101101101 |
| 43       | Enterococcus faecalis B1851 (1157381.3)         | 1.1          | 3217, 463                                | 1754       | 1753        | 1752        | 1751        | 1750        | 1749    | a020000101101101101101 |
| 44       | Enterococcus faecalis B1874 (1157353.3)         | 1.1          | 3182, 464                                | 1742       | 1741        | 1740        | 1739        | 1738        | 1737    | a020000101101101101101 |
| 45       | Enterococcus faecalis CH188 (565644.5)          | 1.1          | 283                                      | 1375       | 1374        | 1373        | 1372        | 1371        | 1370    | a010000101101101101101 |
| 46       | Enterococcus faecalis B1933 (1157383.3)         | 1.1          | 466                                      | 1758       | 1757        | 1756        | 1755        | 1754        | 1753    | a010000101101101101101 |
| 47       | Enterococcus faecalis B2202 (1157384.3)         | 1.1          | 465                                      | 1746       | 1745        | 1744        | 1743        | 1742        | 1741    | a010000101101101101101 |
| 48       | Enterococcus faecalis T14 (1158626.3)           | 1.1          | 2943                                     | 1715       | 1714        | 1713        | 1712        | 1711        | 1710    | a010000101101101101101 |
| 49       | Enterococcus faecalis CH136 (1158661.3)         | 1.1          | 3074                                     | 1689       | 1688        | 1687        | 1686        | 1685        | 1684    | a010000101101101101101 |
| 50       | Enterococcus faecalis B1696 (1157349.3)         | 1.1          | 3206                                     | 1739       | 1738        | 1737        | 1736        | 1735        | 1734    | a010000101101101101101 |
| 51       | Enterococcus faecalis B1678 (1157348.3)         | 1.1          | 463                                      | 1746       | 1745        | 1744        | 1743        | 1742        | 1741    | a010000101101101101101 |
| 52       | Enterococcus faecalis B1623 (1157347.3)         | 1.1          | 3159, 688, 894                           | 2188       | 2187        | 2186        | 2185        | 2184        | 2183    | a030000101101101101101 |
| 53       | Enterococcus faecalis SS-7 (1169298.3)          | 1.1          | 2852, 405                                | 1668       | 1667        | 1666        | 1665        | 1664        | 1663    | a020000101101101101101 |
| 54       | Enterococcus faecalis TX0109 (749502.3)         | 1.1          | 840                                      | 1344       | 1345        | 1346, 2544  | 2543        | 2542        | 2541    | a010000101101202102102 |
| 55       | Enterococcus faecalis B2255 (1157355.3)         | 1.1          | 3160, 3213                               | 1746       | 1745        | 1744        | 1743        | 1742        | 1741    | a020000101101101101101 |
| 56       | Enterococcus faecalis B2391 (1157356.3)         | 1.1          | 3221, 466                                | 1749       | 1748        | 1747        | 1746        | 1745        | 1744    | a020000101101101101101 |
| 57       | Enterococcus faecalis SF370 (1158655.3)         | 1.1          | 182, 501                                 | 1787       | 1786        | 1785        | 1784        | 1783        | 1782    | a020000101101101101101 |
| 58       | Enterococcus faecalis B1586 (1157345.3)         | 1.1          | 3159                                     | 2787       | 2786        | 2785        | 2784        | 2783        | 2782    | a010000101101101101101 |
| 59       | Enterococcus faecalis SF339 (1169305.3)         | 1.1          | 167                                      | 1717       | 1716        | 1715        | 1714        | 1713        | 1712    | a010000101101101101101 |
| 60       | Enterococcus faecalis CH116 (1158660.3)         | 1.1          | 503                                      | 1737       | 1736        | 1735        | 1734        | 1733        | 1732    | a010000101101101101101 |
| 61       | Enterococcus faecalis B4672 (1157409.3)         | 1.1          | 465                                      | 1754       | 1753        | 1752        | 1751        | 1750        | 1749    | a010000101101101101101 |
| 62       | Enterococcus faecalis B2535 (1157358.3)         | 1.1          | 3201, 3272, 466                          | 1741       | 1740        | 1739        | 1738        | 1737        | 1736    | a030000101101101101101 |
| 63       | Enterococcus faecalis SF24397 (1158618.3)       | 1.1          | 528                                      | 1763       | 1762        | 1761        | 1760        | 1759        | 1758    | a010000101101101101101 |
| 64       | Enterococcus faecalis B2557 (1157359.3)         | 1.1          | 3159, 3230, 466                          | 1748       | 1747        | 1746        | 1745        | 1744        | 1743    | a030000101101101101101 |
| 65       | Enterococcus faecalis B15725 (1151186.3)        | 1.1          | 2026                                     | 12         | 11          | 10          | 9           | 8           | 7       | a010000101101101101101 |
| 66       | Enterococcus faecalis SF1592 (1158630.3)        | 1.1          | 466                                      | 1740       | 1739        | 1738        | 1737        | 1736        | 1735    | a010000101101101101101 |
| 67       | Enterococcus faecalis SF100 (1158654.3)         | 1.1          | 547                                      | 1809       | 1808        | 1807        | 1806        | 1805        | 1804    | a010000101101101101101 |
| 68       | Enterococcus faecalis S613 (699185.3)           | 1.1          | 2805                                     | 2180       | 2179        | 2178        | 2177        | 2176        | 2175    | a010000101101101101101 |
| 69       | Enterococcus faecalis RM4679 (1158625.3)        | 1.1          | 3113                                     | 1901       | 1900        | 1899        | 1898        | 1897        | 1896    | a010000101101101101101 |
| 70       | Enterococcus faecalis B2593 (1157360.3)         | 1.1          | 3223, 806                                | 2095       | 2094        | 2093        | 2092        | 2091        | 2090    | a020000101101101101101 |
| 71       | Enterococcus faecalis R712 (699186.3)           | 1.1          | 2293                                     | 1114       | 1115        | 1116        | 1117        | 1118        | 1119    | a010000101101101101101 |
| 72       | Enterococcus faecalis B2685 (1157388.3)         | 1.1          | 463                                      | 1744       | 1743        | 1742        | 1741        | 1740        | 1739    | a010000101101101101101 |
| 73       | Enterococcus faecalis TX0635 = WH245 (749509.5) | 1.1          | 3113                                     | 1719       | 1718        | 1717        | 1716        | 1715        | 1714    | a010000101101101101101 |
| 74       | Enterococcus faecalis B2802 (1157390.3)         | 1.1          | 446                                      | 1838       | 1837        | 1836        | 1835        | 1834        | 1833    | a010000101101101101101 |
| 75       | Enterococcus faecalis B1532 (1157344.3)         | 1.1          | 462                                      | 1751       | 1750        | 1749        | 1748        | 1747        | 1746    | a010000101101101101101 |
| 76       | Enterococcus faecalis MMH594 (1158653.5)        | 1.1          | 464                                      | 1754       | 1753        | 1752        | 1751        | 1750        | 1749    | a010000101101101101101 |
| 77       | Enterococcus faecalis TX1302 (749513.3)         | 1.1          | 2700                                     | 2431       | 2430        | 2429        | 2428        | 2427        | 2426    | a010000101101101101101 |
| 78       | Enterococcus faecalis B1376 (1151211.3)         | 1.1          | 1858                                     | 736        | 735         | 734         | 733         | 732         | 731     | a010000101101101101101 |
| 79       | Enterococcus faecalis B1327 (1151210.3)         | 1.1          | 206, 3120                                | 1495       | 1494        | 1493        | 1492        | 1491        | 1490    | a020000101101101101101 |
| 80       | Enterococcus faecalis B3031 (1157361.3)         | 1.1          | 462, 463                                 | 1749       | 1748        | 1747        | 1746        | 1745        | 1744    | a201000102102102102102 |
| 81       | Enterococcus faecalis B3053 (1157363.3)         | 1.1          | 3188, 465                                | 1765       | 1764        | 1763        | 1762        | 1761        | 1760    | a020000101101101101101 |
| 82       | Enterococcus faecalis B4969 (1157411.3)         | 1.1          | 464                                      | 1766       | 1765        | 1764        | 1763        | 1762        | 1761    | a010000101101101101101 |
| 83       | Enterococcus faecalis WH257 (1158628.3)         | 1.1          | 121, 239                                 | 1651       | 1650        | 1649        | 1648        | 1647        | 1646    | a020000101101101101101 |
| 84       | Enterococcus faecalis A-3-1 (1169246.3)         | 1.1          | 993                                      | 1728       | 1727        | 1726        | 1725        | 1724        | 1723    | a010000101101101101101 |
| 85       | Enterococcus faecalis B3126 (1157364.3)         | 1.1          | 3171, 3189, 466                          | 1783       | 1782        | 1781        | 1780        | 1779        | 1778    | a030000101101101101101 |
| 86       | Enterococcus faecalis 7330112-3 (1151199.3)     | 1.1          | 2386                                     | 1144       | 1145        | 1146        | 1147        | 1148        | 1149    | a010000101101101101101 |
| 87       | Enterococcus faecalis B4674 (1157410.3)         | 1.1          | 206                                      | 1505       | 1504        | 1503        | 1502        | 1501        | 1500    | a010000101101101101101 |
| 88       | Enterococcus faecalis B4411 (1157406.3)         | 1.1          | 792                                      | 2147       | 2146        | 2145        | 2144        | 2143        | 2142    | a010000101101101101101 |
| 89       | Enterococcus faecalis B594 (1157365.3)          | 1.1          | 459                                      | 1755       | 1754        |             |             |             |         |                        |

|     |                                                                  |     |                  |      |      |      |      |      |      |                                 |
|-----|------------------------------------------------------------------|-----|------------------|------|------|------|------|------|------|---------------------------------|
| 96  | Enterococcus faecalis DAPTO 512 (749489.3)                       | 1.1 | 1337             |      | 2029 | 2028 | 2027 | 2026 | 2025 | a010000101101101101101          |
| 97  | Enterococcus faecalis DAPTO 516 (749490.3)                       | 1.1 | 2574             |      | 1419 | 1418 | 1417 | 1416 | 1415 | a010000101101101101101          |
| 98  | Enterococcus faecalis B1249 (1157380.3)                          | 1.1 | 771              |      | 2060 | 2059 | 2058 | 2057 | 2056 | a010000101101101101101          |
| 99  | Enterococcus faecalis B1290 (1151209.3)                          | 1.1 | 3036             |      | 735  | 734  | 733  | 732  | 731  | a010000101101101101101          |
| 100 | Enterococcus faecalis E1 (1158673.3)                             | 1.1 | 2891             |      | 1690 | 1689 | 1688 | 1687 | 1686 | a010000101101101101101          |
| 101 | Enterococcus faecalis B3336 (1157398.3)                          | 1.1 | 477              |      | 1708 | 1707 | 1706 | 1705 | 1704 | a010000101101101101101          |
| 102 | Enterococcus faecalis B3196 (1157396.3)                          | 1.1 | 468              |      | 1838 | 1837 | 1836 | 1835 | 1834 | a010000101101101101101          |
| 103 | Enterococcus faecalis ERV103 (1134785.3)                         | 1.2 | 1004             | 2258 | 485  | 486  | 487  | 488  |      | a0100101011011011010000         |
| 104 | Enterococcus faecalis ERV25 (1134788.3)                          | 1.2 | 1040             | 1299 | 484  | 485  | 486  | 487  |      | a0100101011011011010000         |
| 105 | Enterococcus faecalis F1 (1169297.3)                             | 1.4 | 2938             |      | 1795 | 1794 | 1793 | 1792 | 1789 | a010000101101000010101          |
| 106 | Enterococcus faecalis str. 'C 19315 led 1b pp [SCV]' (1151192.3) | 1.4 | 2653, 948, 949   |      | 719  | 718  | 717  | 716  | 715  | a211000102102000102102          |
| 107 | Enterococcus faecalis C19315WT (1151191.3)                       | 1.4 | 1936, 1937, 441  |      | 1705 | 1704 | 1703 | 1702 | 1701 | a211000102102000102102          |
| 108 | Enterococcus faecalis B5076 (1157412.3)                          | 1.4 | 460              |      | 1679 | 1678 | 1677 | 1676 | 1674 | a010000101101000010101          |
| 109 | Enterococcus faecalis SF28073 (1158624.3)                        | 1.4 | 306              |      | 1519 | 1518 | 1517 | 1516 | 1515 | a010000101101000010101          |
| 110 | Enterococcus faecalis T6 (1169291.3)                             | 1.4 | 264              |      | 1665 | 1664 | 1663 | 1662 | 1661 | a010000101101000010101          |
| 111 | Enterococcus faecalis UAA769 (1157369.3)                         | 1.7 | 2978             |      | 1940 | 1939 | 1938 | 1937 |      | a0100001011011011010000         |
| 112 | Enterococcus faecalis ERV62 (1134792.3)                          | 1.7 | 481              |      | 1234 | 1235 | 1236 | 852  |      | a010000101101101010000          |
| 113 | Enterococcus faecalis ERV81 (1134798.3)                          | 1.7 | 438              |      | 2586 | 2587 | 2588 | 2589 |      | a0100001011011011010000         |
| 114 | Enterococcus faecalis ERV116 (1134786.3)                         | 1.7 | 2787             |      | 2359 | 2358 | 2357 | 2356 |      | a0100001011011011010000         |
| 115 | Enterococcus faecalis B1921 (1157382.3)                          | 1.7 | 404              |      | 1636 | 1635 | 1634 | 1633 |      | a0100001011011011010000         |
| 116 | Enterococcus faecalis B2207 (1157354.3)                          | 1.7 | 407              |      | 1641 | 1640 | 1639 | 1638 |      | a0100001011011011010000         |
| 117 | Enterococcus faecalis ERV31 (1134789.3)                          | 1.7 | 557              |      | 1362 | 1361 | 1360 | 1359 |      | a0100001011011011010000         |
| 118 | Enterococcus faecalis ERV85 (1134799.3)                          | 1.7 | 146              |      | 1591 | 1590 | 1589 | 2432 |      | a010000101101101010000          |
| 119 | Enterococcus faecalis ERV129 (1134787.3)                         | 1.7 | 1416             |      | 2950 | 2949 | 2948 | 1413 |      | a010000101101101010000          |
| 120 | Enterococcus faecalis 12107 (1158664.3)                          | 1.8 |                  | 948  | 1584 | 1583 | 1582 | 1581 |      | a0000101011011011010000         |
| 121 | Enterococcus faecalis ERV65 (1134794.3)                          | 1.8 |                  | 2582 | 2832 | 2833 | 2834 | 1562 |      | a000010101101101010000          |
| 122 | Enterococcus faecalis T13 (1158663.3)                            | 1.9 |                  | 940  | 1576 | 1575 | 1574 | 1573 | 1572 | a0000101011011011010000         |
| 123 | Enterococcus faecalis TX1341 (749514.3)                          | 1.9 |                  | 924  | 1903 | 1904 | 1905 | 1906 | 1907 | a0000101011011011010000         |
| 124 | Enterococcus faecalis D1 (1169247.3)                             | 1.9 |                  | 1026 | 1659 | 1658 | 1657 | 1656 | 1655 | a0000101011011011010000         |
| 125 | Enterococcus faecalis TX0630 (749508.3)                          | 1.9 |                  | 2168 | 1798 | 1799 | 1800 | 1801 | 1802 | a0000101011011011010000         |
| 126 | Enterococcus faecalis T20 (1169285.3)                            | 1.9 |                  | 886  | 1512 | 1511 | 1510 | 1509 | 1508 | a0000101011011011010000         |
| 127 | Enterococcus faecalis TX0102 (749501.3)                          | 1.9 |                  | 443  | 44   | 43   | 42   | 41   | 40   | a0000101011011011010000         |
| 128 | Enterococcus faecalis B2277 (1157386.3)                          | 1.9 |                  | 1145 | 1838 | 1837 | 1836 | 1835 | 1834 | a0000101011011011010000         |
| 129 | Enterococcus faecalis E1Sol (565647.5)                           | 1.9 |                  | 2269 | 1592 | 1593 | 1594 | 1595 | 1596 | a0000101011011011010000         |
| 130 | Enterococcus faecalis TX0012 (749496.3)                          | 1.9 |                  | 1411 | 1871 | 1872 | 1873 | 1874 | 1875 | a0000101011011011010000         |
| 131 | Enterococcus faecalis B3119 (1157395.3)                          | 1.9 |                  | 1140 | 1830 | 1829 | 1828 | 1827 | 1826 | a0000101011011011010000         |
| 132 | Enterococcus faecalis B1005 (1157378.3)                          | 1.9 |                  | 1193 | 1883 | 1882 | 1881 | 1880 | 1879 | a0000101011011011010000         |
| 133 | Enterococcus faecalis B3042 (1157362.3)                          | 1.9 |                  | 1051 | 1743 | 1742 | 1741 | 1740 | 1739 | a0000101011011011010000         |
| 134 | Enterococcus faecalis B1138 (1157379.3)                          | 1.9 |                  | 591  | 1281 | 1280 | 1279 | 1278 | 1277 | a0000101011011011010000         |
| 135 | Enterococcus faecalis T3 (565638.4)                              | 1.9 |                  | 1491 | 2179 | 2178 | 2177 | 2176 | 2175 | a0000101011011011010000         |
| 136 | Enterococcus faecalis TX1342 (749515.3)                          | 1.9 |                  | 1124 | 2534 | 2533 | 2532 | 2531 | 2530 | a0000101011011011010000         |
| 137 | Enterococcus faecalis T10 (1169295.3)                            | 1.9 |                  | 900  | 1549 | 1548 | 1547 | 1546 | 1545 | a0000101011011011010000         |
| 138 | Enterococcus faecalis Merz89 (1169250.3)                         | 1.9 |                  | 1072 | 1705 | 1704 | 1703 | 1702 | 1701 | a0000101011011011010000         |
| 139 | Enterococcus faecalis TX4244 (749494.3)                          | 1.9 |                  | 585  | 1667 | 1666 | 1665 | 1664 | 1663 | a0000101011011011010000         |
| 140 | <b>Enterococcus faecalis OGI RF (474186.5)</b>                   | 1.9 |                  | 849  | 1485 | 1484 | 1483 | 1482 | 1481 | <b>a000010101101101101101</b>   |
| 141 | Enterococcus faecalis TX2137 (749491.3)                          | 1.9 |                  | 90   | 321  | 320  | 319  | 318  | 317  | a000010101101101101101          |
| 142 | Enterococcus faecalis TX0470 (749507.3)                          | 1.9 |                  | 352  | 2406 | 2407 | 2408 | 2409 | 2410 | a000010101101101101101          |
| 143 | Enterococcus faecalis B2867 (1157393.3)                          | 1.9 |                  | 1145 | 1838 | 1837 | 1836 | 1835 | 1834 | a000010101101101101101          |
| 144 | <b>Enterococcus faecalis D32 (1206105.3)</b>                     | 1.9 |                  | 922  | 1562 | 1561 | 1560 | 1559 | 1558 | <b>a000010101101101101101</b>   |
| 145 | Enterococcus faecalis 599951 (1169281.3)                         | 2   |                  | 3283 | 1565 |      | 2197 | 2196 | 2195 | a010010000000101101101          |
| 146 | <b>Enterococcus faecalis 62 (936153.3)</b>                       | 2   | 2942, 3043       | 1494 |      |      | 2136 | 2135 | 2134 | <b>a020010000000101101101</b>   |
| 147 | Enterococcus faecalis TX0411 (749506.3)                          | 2   | 142, 2454, 2455  | 1285 |      |      | 1901 | 1902 | 1903 | a211010000000102102102          |
| 148 | Enterococcus faecalis TX0017 (749497.3)                          | 2   |                  | 692  | 2361 |      | 1938 | 1939 | 1940 | a010010000000101101101          |
| 149 | Enterococcus faecalis H1P11704 (565646.5)                        | 2   | 818, 833         | 2609 |      |      | 2819 | 2820 | 2821 | a020010000000101101101          |
| 150 | Enterococcus faecalis TX1322 (525278.3)                          | 2   |                  | 2799 | 958  |      | 284  | 285  | 286  | a010010000000101101101          |
| 151 | Enterococcus faecalis TX2134 (749518.3)                          | 2   | 2195, 376        | 212  |      |      | 1239 | 1240 | 1241 | a020010000000101101101          |
| 152 | Enterococcus faecalis T7 (1169254.3)                             | 2   |                  | 2835 | 1399 |      | 2030 | 2029 | 2028 | a010010000000101101101          |
| 153 | Enterococcus faecalis T2 (565637.4)                              | 2.1 |                  | 2867 |      |      | 1795 | 1796 | 1797 | a010000000000101101101          |
| 154 | Enterococcus faecalis SF6375 (1169280.3)                         | 2.1 | 2676, 3          |      |      |      | 1537 | 1536 | 1535 | a020000000000101101101          |
| 155 | Enterococcus faecalis SF5039 (1169252.3)                         | 2.1 | 3, 543           |      |      |      | 1876 | 1875 | 1874 | a020000000000101101101          |
| 156 | Enterococcus faecalis SF350 (1169251.3)                          | 2.1 | 14, 552          |      |      |      | 2221 | 2220 | 2219 | a020000000000101101101          |
| 157 | Enterococcus faecalis Merz151 (1169304.3)                        | 2.1 | 390, 420         |      |      |      | 1716 | 1715 | 1714 | a020000000000101101101          |
| 158 | Enterococcus faecalis E99 (1169284.3)                            | 2.1 | 2914, 429        |      |      |      | 1763 | 1762 | 1761 | a020000000000101101101          |
| 159 | Enterococcus faecalis Y16-1 (1158667.3)                          | 2.1 | 199, 2347        |      |      |      | 1696 | 1695 | 1694 | a020000000000101101101          |
| 160 | Enterococcus faecalis TX0860 (749512.3)                          | 2.1 | 2924, 2937, 632  |      |      |      | 132  | 133  | 134  | a030000000000101101101          |
| 161 | Enterococcus faecalis SF21521 (1158668.3)                        | 2.1 | 192, 2           |      |      |      | 1477 | 1476 | 1475 | a020000000000101101101          |
| 162 | Enterococcus faecalis B56765 (1151188.3)                         | 2.1 |                  | 1856 |      |      | 951  | 952  | 953  | a010000000000101101101          |
| 163 | Enterococcus faecalis ATCC 4200 (565642.4)                       | 2.3 |                  |      |      |      | 2233 | 2232 | 2231 | a000000000000101101101          |
| 164 | Enterococcus faecalis ATCC 19433 (1169286.3)                     | 2.3 |                  |      |      |      | 1613 | 1612 | 1611 | a000000000000101101101          |
| 165 | Enterococcus faecalis T4 (1169253.3)                             | 2.3 |                  |      |      |      | 1681 | 1680 | 1679 | a000000000000101101101          |
| 166 | Enterococcus faecalis SF24413 (1158619.3)                        | 3.1 |                  | 530  |      | 1761 | 1760 | 1759 | 1758 | a0100000000101101101101         |
| 167 | Enterococcus faecalis TR197 (1169307.3)                          | 3.1 | 2086, 492        |      |      | 1902 | 1901 | 1900 | 1899 | a0200000000101101101101         |
| 168 | Enterococcus faecalis RC73 (1158678.3)                           | 4   |                  | 1009 | 1123 | 1759 | 1758 | 1756 | 1755 | a010010101101000010101          |
| 169 | Enterococcus faecalis Merz96 (565645.4)                          | 4   | 2671, 617        |      | 2341 | 1728 | 1729 | 1730 | 1731 | a020010101101000010101          |
| 170 | Enterococcus faecalis ATCC 10100 (1169312.3)                     | 4.1 |                  |      | 1102 | 1740 | 1739 | 1737 | 1736 | a000010101101000010101          |
| 171 | Enterococcus faecalis Fly1 (565649.5)                            | 4.1 |                  |      | 2346 | 1608 | 1609 | 1610 | 1611 | a000010101101000010101          |
| 172 | Enterococcus faecalis B653 (1169309.3)                           | 4.8 |                  | 2624 |      | 1476 | 1475 | 1473 |      | a0100001011010000101000         |
| 173 | Enterococcus faecalis T18 (1169296.3)                            | 4.8 |                  | 2728 |      | 1537 | 1536 | 1534 |      | a0100001011010000101000         |
| 174 | Enterococcus faecalis X98 (565641.4)                             | 5   |                  | 2759 | 2230 |      | 1535 | 1536 | 1537 | a010010000101000010101          |
| 175 | Enterococcus faecalis ATCC 27959 (1158676.3)                     | 5.2 |                  |      | 1383 |      | 1381 | 1380 | 1379 | a0000001010000101101101         |
| 176 | Enterococcus faecalis HEF39 (1157368.3)                          | 9   | 163, 164, 438    |      |      |      |      |      |      | a21100000000000000000000        |
| 177 | Enterococcus faecalis DS5 (565643.5)                             | 9   | 1659, 2072, 2850 |      |      |      |      |      |      | a03000000000000000000000        |
| 178 | Enterococcus faecalis UAA1014 (1158546.3)                        | 9   | 25, 509          |      |      |      |      |      |      | a02000000000000000000000        |
| 179 | Enterococcus faecalis 1448E03 (1151193.3)                        | 9   | 161, 440         |      |      |      |      |      |      | a02000000000000000000000        |
| 180 | Enterococcus faecalis 19116 (1151195.3)                          | 9   |                  | 1095 |      |      |      |      |      | a01000000000000000000000        |
| 181 | Enterococcus faecalis UAA1180 (1158552.3)                        | 9   |                  | 281  |      |      |      |      |      | a01000000000000000000000        |
| 182 | <b>Enterococcus faecalis str. Symbioflor 1 (1261557.3)</b>       | 9   |                  | 397  |      |      |      |      |      | <b>a01000000000000000000000</b> |
| 183 | Enterococcus faecalis 7430821-4 (1151208.3)                      | 9   |                  | 2712 |      |      |      |      |      | a01000000000000000000000        |
| 184 | Enterococcus faecalis 7430416-3 (1151207.3)                      | 9   |                  | 398  |      |      |      |      |      | a01000000000000000000000        |
| 185 | Enterococcus faecalis 7430275-3 (1151205.3)                      | 9   |                  | 2010 |      |      |      |      |      | a01000000000000000000000        |
| 186 | Enterococcus faecalis 7330948-5 (1151204.3)                      | 9   |                  | 1550 |      |      |      |      |      | a01000000000000000000000        |
| 187 | Enterococcus faecalis 7330259-5 (1151202.3)                      | 9   | 2760, 2807       |      |      |      |      |      |      | a02000000000000000000000        |
| 188 | Enterococcus faecalis 7330257-1 (1151201.3)                      | 9   |                  | 2003 |      |      |      |      |      | a01000000000000000000000        |
| 189 | Enterococcus faecalis B16457 (1151187.3)                         | 9   | 1179, 1180, 2475 |      |      |      |      |      |      | a21100000000000000000000        |
| 190 | Enterococcus faecalis B84847 (1151190.3)                         | 9   |                  | 1703 |      |      |      |      |      | a01000000000000000000000        |
| 191 | Enterococcus faecalis TUSoD Efl11 (553209.3)                     | 9.1 |                  | 2151 | 2313 |      |      |      |      | a01001000000000000000000        |
| 192 | Enterococcus faecalis D6 (565650.5)                              | 9.1 |                  | 149  | 749  |      |      |      |      | a01001000000000000000000        |

## Compared organisms:

|                              |                                                            |
|------------------------------|------------------------------------------------------------|
| <b>Reference</b>             | <i>Enterococcus faecalis</i> V583 (226185.1)               |
| <b>Comparison Organism 1</b> | <i>Enterococcus faecalis</i> 62 (936153.3)                 |
| <b>Comparison Organism 2</b> | <i>Enterococcus faecalis</i> D32 (1206105.3)               |
| <b>Comparison Organism 3</b> | <i>Enterococcus faecalis</i> OG1RF (474186.5)              |
| <b>Comparison Organism 4</b> | <i>Enterococcus faecalis</i> str. Symbioflor 1 (1261557.3) |

## Percent protein sequence identity

|                         |     |      |      |      |    |    |    |    |    |    |    |    |    |    |    |    |
|-------------------------|-----|------|------|------|----|----|----|----|----|----|----|----|----|----|----|----|
| Bidirectional best hit  | 100 | 99.9 | 99.8 | 99.5 | 99 | 98 | 95 | 90 | 80 | 70 | 60 | 50 | 40 | 30 | 20 | 10 |
| Unidirectional best hit | 100 | 99.9 | 99.8 | 99.5 | 99 | 98 | 95 | 90 | 80 | 70 | 60 | 50 | 40 | 30 | 20 | 10 |

| 226185.1 |                    |        | 936153.3 |        |                     | 1206105.3 |        |                    | 474186.5 |        |                    | 1261557.3 |        |                    |
|----------|--------------------|--------|----------|--------|---------------------|-----------|--------|--------------------|----------|--------|--------------------|-----------|--------|--------------------|
| Contig   | Gene               | Length | Hit      | Contig | Gene                | Hit       | Contig | Gene               | Hit      | Contig | Gene               | Hit       | Contig | Gene               |
| 1        | <a href="#">1</a>  | 448    | bi       | 1      | <a href="#">384</a> | bi        | 1      | <a href="#">1</a>  | bi       | 1      | <a href="#">1</a>  | bi        | 1      | <a href="#">1</a>  |
| 1        | <a href="#">2</a>  | 377    | bi       | 1      | <a href="#">385</a> | bi        | 1      | <a href="#">2</a>  | bi       | 1      | <a href="#">2</a>  | bi        | 1      | <a href="#">2</a>  |
| 1        | <a href="#">3</a>  | 82     | bi       | 1      | <a href="#">386</a> | bi        | 1      | <a href="#">3</a>  | bi       | 1      | <a href="#">3</a>  | bi        | 1      | <a href="#">3</a>  |
| 1        | <a href="#">4</a>  | 376    | bi       | 1      | <a href="#">387</a> | bi        | 1      | <a href="#">4</a>  | bi       | 1      | <a href="#">4</a>  | bi        | 1      | <a href="#">4</a>  |
| 1        | <a href="#">5</a>  | 643    | bi       | 1      | <a href="#">388</a> | bi        | 1      | <a href="#">5</a>  | bi       | 1      | <a href="#">5</a>  | bi        | 1      | <a href="#">5</a>  |
| 1        | <a href="#">6</a>  | 834    | bi       | 1      | <a href="#">389</a> | bi        | 1      | <a href="#">6</a>  | bi       | 1      | <a href="#">6</a>  | bi        | 1      | <a href="#">6</a>  |
| 1        | <a href="#">7</a>  | 101    | bi       | 1      | <a href="#">390</a> | bi        | 1      | <a href="#">7</a>  | bi       | 1      | <a href="#">7</a>  | bi        | 1      | <a href="#">7</a>  |
| 1        | <a href="#">8</a>  | 189    | bi       | 1      | <a href="#">391</a> | bi        | 1      | <a href="#">8</a>  | bi       | 1      | <a href="#">8</a>  | bi        | 1      | <a href="#">8</a>  |
| 1        | <a href="#">9</a>  | 80     | bi       | 1      | <a href="#">392</a> | bi        | 1      | <a href="#">9</a>  | bi       | 1      | <a href="#">9</a>  | bi        | 1      | <a href="#">9</a>  |
| 1        | <a href="#">10</a> | 659    | bi       | 1      | <a href="#">393</a> | bi        | 1      | <a href="#">10</a> | bi       | 1      | <a href="#">10</a> | bi        | 1      | <a href="#">10</a> |
| 1        | <a href="#">11</a> | 151    | bi       | 1      | <a href="#">394</a> | bi        | 1      | <a href="#">11</a> | bi       | 1      | <a href="#">11</a> | bi        | 1      | <a href="#">11</a> |
| 1        | <a href="#">12</a> | 456    | bi       | 1      | <a href="#">395</a> | bi        | 1      | <a href="#">15</a> | bi       | 1      | <a href="#">12</a> | bi        | 1      | <a href="#">12</a> |
| 1        | <a href="#">13</a> | 431    | bi       | 1      | <a href="#">396</a> | bi        | 1      | <a href="#">16</a> | bi       | 1      | <a href="#">13</a> | bi        | 1      | <a href="#">13</a> |
| 1        | <a href="#">14</a> | 290    | bi       | 1      | <a href="#">397</a> | bi        | 1      | <a href="#">17</a> | bi       | 1      | <a href="#">14</a> | bi        | 1      | <a href="#">14</a> |
| 1        | <a href="#">15</a> | 544    | bi       | 1      | <a href="#">398</a> | bi        | 1      | <a href="#">18</a> | bi       | 1      | <a href="#">15</a> | bi        | 1      | <a href="#">15</a> |
| 1        | <a href="#">16</a> | 962    | bi       | 1      | <a href="#">399</a> | bi        | 1      | <a href="#">19</a> | bi       | 1      | <a href="#">16</a> | bi        | 1      | <a href="#">16</a> |
| 1        | <a href="#">17</a> | 171    | bi       | 1      | <a href="#">400</a> | bi        | 1      | <a href="#">20</a> | bi       | 1      | <a href="#">17</a> | bi        | 1      | <a href="#">17</a> |
| 1        | <a href="#">18</a> | 331    | bi       | 1      | <a href="#">401</a> | bi        | 1      | <a href="#">21</a> | bi       | 1      | <a href="#">18</a> | bi        | 1      | <a href="#">18</a> |
| 1        | <a href="#">19</a> | 268    | bi       | 1      | <a href="#">402</a> | bi        | 1      | <a href="#">22</a> | bi       | 1      | <a href="#">19</a> | bi        | 1      | <a href="#">19</a> |
| 1        | <a href="#">20</a> | 304    | bi       | 1      | <a href="#">403</a> | bi        | 1      | <a href="#">23</a> | bi       | 1      | <a href="#">20</a> | bi        | 1      | <a href="#">20</a> |
| 1        | <a href="#">21</a> | 126    | bi       | 1      | <a href="#">404</a> | bi        | 1      | <a href="#">24</a> | bi       | 1      | <a href="#">21</a> | bi        | 1      | <a href="#">21</a> |
| 1        | <a href="#">22</a> | 176    | bi       | 1      | <a href="#">405</a> | bi        | 1      | <a href="#">25</a> | bi       | 1      | <a href="#">22</a> | bi        | 1      | <a href="#">22</a> |
| 1        | <a href="#">23</a> | 68     | bi       | 1      | <a href="#">406</a> | bi        | 1      | <a href="#">26</a> | bi       | 1      | <a href="#">23</a> | bi        | 1      | <a href="#">23</a> |
| 1        | <a href="#">24</a> | 257    | bi       | 1      | <a href="#">407</a> | bi        | 1      | <a href="#">27</a> | bi       | 1      | <a href="#">24</a> | bi        | 1      | <a href="#">24</a> |
| 1        | <a href="#">25</a> | 523    | bi       | 1      | <a href="#">408</a> | bi        | 1      | <a href="#">28</a> | bi       | 1      | <a href="#">25</a> | bi        | 1      | <a href="#">25</a> |
| 1        | <a href="#">26</a> | 405    | bi       | 1      | <a href="#">409</a> | bi        | 1      | <a href="#">29</a> | bi       | 1      | <a href="#">26</a> | bi        | 1      | <a href="#">26</a> |
| 1        | <a href="#">27</a> | 127    | bi       | 1      | <a href="#">410</a> | bi        | 1      | <a href="#">30</a> | bi       | 1      | <a href="#">27</a> | bi        | 1      | <a href="#">27</a> |
| 1        | <a href="#">28</a> | 864    | bi       | 1      | <a href="#">411</a> | bi        | 1      | <a href="#">31</a> | bi       | 1      | <a href="#">28</a> | bi        | 1      | <a href="#">32</a> |
| 1        | <a href="#">29</a> | 872    | bi       | 1      | <a href="#">413</a> | bi        | 1      | <a href="#">32</a> | bi       | 1      | <a href="#">29</a> | bi        | 1      | <a href="#">33</a> |
| 1        | <a href="#">30</a> | 50     | bi       | 1      | <a href="#">414</a> | bi        | 1      | <a href="#">33</a> | bi       | 1      | <a href="#">30</a> | bi        | 1      | <a href="#">34</a> |
| 1        | <a href="#">31</a> | 170    | bi       | 1      | <a href="#">415</a> | bi        | 1      | <a href="#">34</a> | bi       | 1      | <a href="#">31</a> | bi        | 1      | <a href="#">35</a> |
| 1        | <a href="#">32</a> | 156    | bi       | 1      | <a href="#">416</a> | bi        | 1      | <a href="#">35</a> | bi       | 1      | <a href="#">32</a> | bi        | 1      | <a href="#">36</a> |
| 1        | <a href="#">33</a> | 312    | bi       | 1      | <a href="#">417</a> | bi        | 1      | <a href="#">36</a> | bi       | 1      | <a href="#">33</a> | bi        | 1      | <a href="#">37</a> |
| 1        | <a href="#">34</a> | 418    | bi       | 1      | <a href="#">418</a> | bi        | 1      | <a href="#">37</a> | bi       | 1      | <a href="#">34</a> | bi        | 1      | <a href="#">38</a> |
| 1        | <a href="#">35</a> | 272    | bi       | 1      | <a href="#">419</a> | bi        | 1      | <a href="#">38</a> | bi       | 1      | <a href="#">35</a> | bi        | 1      | <a href="#">39</a> |
| 1        | <a href="#">36</a> | 160    | bi       | 1      | <a href="#">420</a> | bi        | 1      | <a href="#">39</a> | bi       | 1      | <a href="#">36</a> | bi        | 1      | <a href="#">40</a> |
| 1        | <a href="#">37</a> | 457    | bi       | 1      | <a href="#">421</a> | bi        | 1      | <a href="#">40</a> | bi       | 1      | <a href="#">37</a> | bi        | 1      | <a href="#">41</a> |
| 1        | <a href="#">38</a> | 382    | bi       | 1      | <a href="#">422</a> | bi        | 1      | <a href="#">41</a> | bi       | 1      | <a href="#">38</a> | bi        | 1      | <a href="#">42</a> |
| 1        | <a href="#">39</a> | 158    | bi       | 1      | <a href="#">423</a> | bi        | 1      | <a href="#">42</a> | bi       | 1      | <a href="#">39</a> | bi        | 1      | <a href="#">43</a> |
| 1        | <a href="#">40</a> | 486    | bi       | 1      | <a href="#">424</a> | bi        | 1      | <a href="#">43</a> | bi       | 1      | <a href="#">40</a> | bi        | 1      | <a href="#">44</a> |
| 1        | <a href="#">41</a> | 180    | bi       | 1      | <a href="#">425</a> | bi        | 1      | <a href="#">44</a> | bi       | 1      | <a href="#">41</a> | bi        | 1      | <a href="#">45</a> |
| 1        | <a href="#">42</a> | 471    | bi       | 1      | <a href="#">426</a> | bi        | 1      | <a href="#">45</a> | bi       | 1      | <a href="#">42</a> | bi        | 1      | <a href="#">46</a> |

|   |                    |      |     |   |                      |     |   |                      |     |   |                      |     |   |                      |
|---|--------------------|------|-----|---|----------------------|-----|---|----------------------|-----|---|----------------------|-----|---|----------------------|
| 1 | <a href="#">43</a> | 133  | bi  | 1 | <a href="#">427</a>  | bi  | 1 | <a href="#">46</a>   | bi  | 1 | <a href="#">43</a>   | bi  | 1 | <a href="#">47</a>   |
| 1 | <a href="#">44</a> | 283  | bi  | 1 | <a href="#">428</a>  | bi  | 1 | <a href="#">47</a>   | bi  | 1 | <a href="#">44</a>   | bi  | 1 | <a href="#">48</a>   |
| 1 | <a href="#">45</a> | 177  | bi  | 1 | <a href="#">429</a>  | bi  | 1 | <a href="#">48</a>   | bi  | 1 | <a href="#">45</a>   | bi  | 1 | <a href="#">49</a>   |
| 1 | <a href="#">46</a> | 189  | bi  | 1 | <a href="#">430</a>  | bi  | 1 | <a href="#">49</a>   | bi  | 1 | <a href="#">46</a>   | bi  | 1 | <a href="#">50</a>   |
| 1 | <a href="#">47</a> | 82   | bi  | 1 | <a href="#">431</a>  | bi  | 1 | <a href="#">50</a>   | bi  | 1 | <a href="#">47</a>   | bi  | 1 | <a href="#">51</a>   |
| 1 | <a href="#">48</a> | 284  | bi  | 1 | <a href="#">432</a>  | bi  | 1 | <a href="#">51</a>   | bi  | 1 | <a href="#">48</a>   | bi  | 1 | <a href="#">52</a>   |
| 1 | <a href="#">49</a> | 209  | -   |   |                      | -   |   |                      | -   |   |                      | -   |   |                      |
| 1 | <a href="#">50</a> | 290  | uni | 1 | <a href="#">2501</a> | uni | 1 | <a href="#">2017</a> | uni | 1 | <a href="#">1757</a> | uni | 1 | <a href="#">1906</a> |
| 1 | <a href="#">51</a> | 137  | -   |   |                      | -   |   |                      | -   |   |                      | -   |   |                      |
| 1 | <a href="#">52</a> | 318  | bi  | 1 | <a href="#">433</a>  | bi  | 1 | <a href="#">52</a>   | bi  | 1 | <a href="#">49</a>   | bi  | 1 | <a href="#">53</a>   |
| 1 | <a href="#">53</a> | 231  | bi  | 1 | <a href="#">434</a>  | bi  | 1 | <a href="#">53</a>   | bi  | 1 | <a href="#">50</a>   | bi  | 1 | <a href="#">54</a>   |
| 1 | <a href="#">54</a> | 280  | bi  | 1 | <a href="#">435</a>  | bi  | 1 | <a href="#">54</a>   | bi  | 1 | <a href="#">51</a>   | bi  | 1 | <a href="#">55</a>   |
| 1 | <a href="#">55</a> | 274  | bi  | 1 | <a href="#">436</a>  | bi  | 1 | <a href="#">55</a>   | bi  | 1 | <a href="#">52</a>   | bi  | 1 | <a href="#">56</a>   |
| 1 | <a href="#">56</a> | 459  | bi  | 1 | <a href="#">437</a>  | bi  | 1 | <a href="#">56</a>   | bi  | 1 | <a href="#">53</a>   | bi  | 1 | <a href="#">57</a>   |
| 1 | <a href="#">57</a> | 1314 | bi  | 1 | <a href="#">439</a>  | bi  | 1 | <a href="#">57</a>   | bi  | 1 | <a href="#">54</a>   | bi  | 1 | <a href="#">58</a>   |
| 1 | <a href="#">58</a> | 560  | bi  | 1 | <a href="#">440</a>  | bi  | 1 | <a href="#">60</a>   | bi  | 1 | <a href="#">55</a>   | bi  | 1 | <a href="#">59</a>   |
| 1 | <a href="#">59</a> | 75   | bi  | 1 | <a href="#">441</a>  | bi  | 1 | <a href="#">61</a>   | bi  | 1 | <a href="#">56</a>   | bi  | 1 | <a href="#">60</a>   |
| 1 | <a href="#">60</a> | 329  | bi  | 1 | <a href="#">442</a>  | bi  | 1 | <a href="#">62</a>   | bi  | 1 | <a href="#">57</a>   | bi  | 1 | <a href="#">61</a>   |
| 1 | <a href="#">61</a> | 205  | bi  | 1 | <a href="#">443</a>  | bi  | 1 | <a href="#">64</a>   | bi  | 1 | <a href="#">58</a>   | bi  | 1 | <a href="#">63</a>   |
| 1 | <a href="#">62</a> | 339  | bi  | 1 | <a href="#">444</a>  | bi  | 1 | <a href="#">65</a>   | bi  | 1 | <a href="#">59</a>   | bi  | 1 | <a href="#">64</a>   |
| 1 | <a href="#">63</a> | 146  | -   |   |                      | bi  | 1 | <a href="#">66</a>   | bi  | 1 | <a href="#">60</a>   | bi  | 1 | <a href="#">65</a>   |
| 1 | <a href="#">64</a> | 233  | bi  | 1 | <a href="#">445</a>  | bi  | 1 | <a href="#">67</a>   | bi  | 1 | <a href="#">61</a>   | bi  | 1 | <a href="#">66</a>   |
| 1 | <a href="#">65</a> | 780  | bi  | 1 | <a href="#">446</a>  | bi  | 1 | <a href="#">68</a>   | bi  | 1 | <a href="#">62</a>   | bi  | 1 | <a href="#">67</a>   |
| 1 | <a href="#">66</a> | 306  | bi  | 1 | <a href="#">447</a>  | bi  | 1 | <a href="#">69</a>   | bi  | 1 | <a href="#">63</a>   | bi  | 1 | <a href="#">68</a>   |
| 1 | <a href="#">67</a> | 218  | bi  | 1 | <a href="#">448</a>  | bi  | 1 | <a href="#">70</a>   | bi  | 1 | <a href="#">64</a>   | bi  | 1 | <a href="#">70</a>   |
| 1 | <a href="#">68</a> | 298  | bi  | 1 | <a href="#">450</a>  | bi  | 1 | <a href="#">72</a>   | bi  | 1 | <a href="#">65</a>   | bi  | 1 | <a href="#">72</a>   |
| 1 | <a href="#">69</a> | 191  | bi  | 1 | <a href="#">451</a>  | bi  | 1 | <a href="#">73</a>   | bi  | 1 | <a href="#">66</a>   | bi  | 1 | <a href="#">73</a>   |
| 1 | <a href="#">70</a> | 64   | bi  | 1 | <a href="#">452</a>  | bi  | 1 | <a href="#">74</a>   | bi  | 1 | <a href="#">67</a>   | bi  | 1 | <a href="#">74</a>   |
| 1 | <a href="#">71</a> | 171  | bi  | 1 | <a href="#">453</a>  | bi  | 1 | <a href="#">75</a>   | bi  | 1 | <a href="#">68</a>   | bi  | 1 | <a href="#">75</a>   |
| 1 | <a href="#">72</a> | 187  | bi  | 1 | <a href="#">454</a>  | bi  | 1 | <a href="#">76</a>   | bi  | 1 | <a href="#">69</a>   | bi  | 1 | <a href="#">76</a>   |
| 1 | <a href="#">73</a> | 81   | bi  | 1 | <a href="#">455</a>  | bi  | 1 | <a href="#">77</a>   | bi  | 1 | <a href="#">70</a>   | bi  | 1 | <a href="#">77</a>   |
| 1 | <a href="#">74</a> | 412  | bi  | 1 | <a href="#">461</a>  | bi  | 1 | <a href="#">78</a>   | bi  | 1 | <a href="#">76</a>   | bi  | 1 | <a href="#">78</a>   |
| 1 | <a href="#">75</a> | 60   | bi  | 1 | <a href="#">462</a>  | bi  | 1 | <a href="#">79</a>   | bi  | 1 | <a href="#">77</a>   | bi  | 1 | <a href="#">79</a>   |
| 1 | <a href="#">76</a> | 128  | uni | 1 | <a href="#">463</a>  | uni | 1 | <a href="#">80</a>   | uni | 1 | <a href="#">79</a>   | uni | 1 | <a href="#">80</a>   |
| 1 | <a href="#">77</a> | 368  | bi  | 1 | <a href="#">463</a>  | bi  | 1 | <a href="#">81</a>   | bi  | 1 | <a href="#">79</a>   | bi  | 1 | <a href="#">80</a>   |
| 1 | <a href="#">78</a> | 496  | bi  | 1 | <a href="#">464</a>  | bi  | 1 | <a href="#">82</a>   | bi  | 1 | <a href="#">80</a>   | bi  | 1 | <a href="#">81</a>   |
| 1 | <a href="#">79</a> | 1988 | bi  | 1 | <a href="#">466</a>  | bi  | 1 | <a href="#">84</a>   | bi  | 1 | <a href="#">81</a>   | bi  | 1 | <a href="#">82</a>   |
| 1 | <a href="#">80</a> | 305  | bi  | 1 | <a href="#">467</a>  | bi  | 1 | <a href="#">85</a>   | bi  | 1 | <a href="#">82</a>   | bi  | 1 | <a href="#">83</a>   |
| 1 | <a href="#">81</a> | 502  | bi  | 1 | <a href="#">468</a>  | bi  | 1 | <a href="#">86</a>   | bi  | 1 | <a href="#">83</a>   | bi  | 1 | <a href="#">84</a>   |
| 1 | <a href="#">82</a> | 80   | bi  | 1 | <a href="#">469</a>  | bi  | 1 | <a href="#">87</a>   | bi  | 1 | <a href="#">84</a>   | bi  | 1 | <a href="#">85</a>   |
| 1 | <a href="#">83</a> | 1056 | bi  | 1 | <a href="#">470</a>  | bi  | 1 | <a href="#">88</a>   | bi  | 1 | <a href="#">85</a>   | bi  | 1 | <a href="#">86</a>   |
| 1 | <a href="#">84</a> | 257  | bi  | 1 | <a href="#">471</a>  | bi  | 1 | <a href="#">89</a>   | bi  | 1 | <a href="#">86</a>   | bi  | 1 | <a href="#">87</a>   |
| 1 | <a href="#">85</a> | 262  | bi  | 1 | <a href="#">472</a>  | bi  | 1 | <a href="#">90</a>   | bi  | 1 | <a href="#">87</a>   | bi  | 1 | <a href="#">88</a>   |
| 1 | <a href="#">86</a> | 227  | bi  | 1 | <a href="#">473</a>  | bi  | 1 | <a href="#">91</a>   | bi  | 1 | <a href="#">88</a>   | bi  | 1 | <a href="#">90</a>   |
| 1 | <a href="#">87</a> | 369  | bi  | 1 | <a href="#">474</a>  | bi  | 1 | <a href="#">92</a>   | bi  | 1 | <a href="#">89</a>   | bi  | 1 | <a href="#">92</a>   |
| 1 | <a href="#">88</a> | 220  | bi  | 1 | <a href="#">475</a>  | bi  | 1 | <a href="#">93</a>   | bi  | 1 | <a href="#">90</a>   | bi  | 1 | <a href="#">93</a>   |
| 1 | <a href="#">89</a> | 298  | bi  | 1 | <a href="#">476</a>  | bi  | 1 | <a href="#">94</a>   | bi  | 1 | <a href="#">91</a>   | bi  | 1 | <a href="#">94</a>   |
| 1 | <a href="#">90</a> | 424  | bi  | 1 | <a href="#">477</a>  | bi  | 1 | <a href="#">95</a>   | bi  | 1 | <a href="#">92</a>   | bi  | 1 | <a href="#">95</a>   |
| 1 | <a href="#">91</a> | 305  | bi  | 1 | <a href="#">478</a>  | bi  | 1 | <a href="#">96</a>   | bi  | 1 | <a href="#">93</a>   | bi  | 1 | <a href="#">96</a>   |
| 1 | <a href="#">92</a> | 160  | bi  | 1 | <a href="#">479</a>  | bi  | 1 | <a href="#">97</a>   | bi  | 1 | <a href="#">94</a>   | bi  | 1 | <a href="#">97</a>   |
| 1 | <a href="#">93</a> | 163  | bi  | 1 | <a href="#">480</a>  | bi  | 1 | <a href="#">98</a>   | bi  | 1 | <a href="#">95</a>   | bi  | 1 | <a href="#">98</a>   |
| 1 | <a href="#">94</a> | 409  | bi  | 1 | <a href="#">481</a>  | bi  | 1 | <a href="#">99</a>   | bi  | 1 | <a href="#">96</a>   | bi  | 1 | <a href="#">99</a>   |
| 1 | <a href="#">95</a> | 340  | bi  | 1 | <a href="#">482</a>  | bi  | 1 | <a href="#">100</a>  | bi  | 1 | <a href="#">97</a>   | bi  | 1 | <a href="#">100</a>  |
| 1 | <a href="#">96</a> | 311  | bi  | 1 | <a href="#">483</a>  | bi  | 1 | <a href="#">101</a>  | bi  | 1 | <a href="#">98</a>   | bi  | 1 | <a href="#">101</a>  |
| 1 | <a href="#">97</a> | 231  | bi  | 1 | <a href="#">484</a>  | bi  | 1 | <a href="#">102</a>  | bi  | 1 | <a href="#">99</a>   | bi  | 1 | <a href="#">102</a>  |
| 1 | <a href="#">98</a> | 484  | bi  | 1 | <a href="#">485</a>  | bi  | 1 | <a href="#">103</a>  | bi  | 1 | <a href="#">100</a>  | bi  | 1 | <a href="#">103</a>  |
| 1 | <a href="#">99</a> | 227  | bi  | 1 | <a href="#">486</a>  | bi  | 1 | <a href="#">104</a>  | bi  | 1 | <a href="#">101</a>  | bi  | 1 | <a href="#">104</a>  |



|   |                     |      |     |   |                      |     |   |                      |     |   |                      |     |   |                      |
|---|---------------------|------|-----|---|----------------------|-----|---|----------------------|-----|---|----------------------|-----|---|----------------------|
| 1 | <a href="#">100</a> | 112  | bi  | 1 | <a href="#">487</a>  | bi  | 1 | <a href="#">105</a>  | bi  | 1 | <a href="#">102</a>  | bi  | 1 | <a href="#">105</a>  |
| 1 | <a href="#">101</a> | 340  | bi  | 1 | <a href="#">488</a>  | bi  | 1 | <a href="#">106</a>  | bi  | 1 | <a href="#">103</a>  | bi  | 1 | <a href="#">106</a>  |
| 1 | <a href="#">102</a> | 268  | -   |   |                      | -   |   |                      | -   |   |                      | -   |   |                      |
| 1 | <a href="#">103</a> | 272  | -   |   |                      | -   |   |                      | -   |   |                      | -   |   |                      |
| 1 | <a href="#">104</a> | 836  | bi  | 1 | <a href="#">489</a>  | bi  | 1 | <a href="#">107</a>  | bi  | 1 | <a href="#">104</a>  | bi  | 1 | <a href="#">107</a>  |
| 1 | <a href="#">105</a> | 423  | bi  | 1 | <a href="#">490</a>  | bi  | 1 | <a href="#">108</a>  | bi  | 1 | <a href="#">106</a>  | bi  | 1 | <a href="#">108</a>  |
| 1 | <a href="#">106</a> | 148  | bi  | 1 | <a href="#">491</a>  | bi  | 1 | <a href="#">109</a>  | bi  | 1 | <a href="#">107</a>  | bi  | 1 | <a href="#">109</a>  |
| 1 | <a href="#">107</a> | 471  | bi  | 1 | <a href="#">492</a>  | bi  | 1 | <a href="#">110</a>  | bi  | 1 | <a href="#">108</a>  | bi  | 1 | <a href="#">110</a>  |
| 1 | <a href="#">108</a> | 322  | bi  | 1 | <a href="#">493</a>  | bi  | 1 | <a href="#">111</a>  | bi  | 1 | <a href="#">109</a>  | bi  | 1 | <a href="#">111</a>  |
| 1 | <a href="#">109</a> | 263  | bi  | 1 | <a href="#">494</a>  | bi  | 1 | <a href="#">112</a>  | bi  | 1 | <a href="#">110</a>  | bi  | 1 | <a href="#">112</a>  |
| 1 | <a href="#">110</a> | 179  | bi  | 1 | <a href="#">495</a>  | bi  | 1 | <a href="#">113</a>  | bi  | 1 | <a href="#">111</a>  | bi  | 1 | <a href="#">113</a>  |
| 1 | <a href="#">111</a> | 76   | -   |   |                      | -   |   |                      | -   |   |                      | -   |   |                      |
| 1 | <a href="#">112</a> | 126  | -   |   |                      | bi  | 1 | <a href="#">114</a>  | -   |   |                      | -   |   |                      |
| 1 | <a href="#">113</a> | 784  | -   |   |                      | bi  | 1 | <a href="#">115</a>  | bi  | 1 | <a href="#">2183</a> | -   |   |                      |
| 1 | <a href="#">114</a> | 120  | bi  | 1 | <a href="#">496</a>  | bi  | 1 | <a href="#">116</a>  | -   |   |                      | bi  | 1 | <a href="#">114</a>  |
| 1 | <a href="#">115</a> | 391  | uni | 1 | <a href="#">2146</a> | -   |   |                      | -   |   |                      | bi  | 1 | <a href="#">1007</a> |
| 1 | <a href="#">116</a> | 206  | -   |   |                      | bi  | 1 | <a href="#">117</a>  | -   |   |                      | -   |   |                      |
| 1 | <a href="#">117</a> | 192  | -   |   |                      | -   |   |                      | -   |   |                      | -   |   |                      |
| 1 | <a href="#">118</a> | 213  | uni | 1 | <a href="#">2344</a> | uni | 1 | <a href="#">1707</a> | -   |   |                      | -   |   |                      |
| 1 | <a href="#">119</a> | 125  | uni | 1 | <a href="#">1316</a> | uni | 1 | <a href="#">1197</a> | uni | 1 | <a href="#">1122</a> | uni | 1 | <a href="#">1193</a> |
| 1 | <a href="#">120</a> | 61   | -   |   |                      | -   |   |                      | -   |   |                      | -   |   |                      |
| 1 | <a href="#">121</a> | 84   | -   |   |                      | -   |   |                      | -   |   |                      | -   |   |                      |
| 1 | <a href="#">122</a> | 109  | -   |   |                      | -   |   |                      | -   |   |                      | -   |   |                      |
| 1 | <a href="#">123</a> | 136  | -   |   |                      | -   |   |                      | -   |   |                      | -   |   |                      |
| 1 | <a href="#">124</a> | 75   | -   |   |                      | -   |   |                      | -   |   |                      | -   |   |                      |
| 1 | <a href="#">125</a> | 81   | -   |   |                      | -   |   |                      | -   |   |                      | -   |   |                      |
| 1 | <a href="#">126</a> | 135  | -   |   |                      | -   |   |                      | -   |   |                      | -   |   |                      |
| 1 | <a href="#">127</a> | 111  | -   |   |                      | -   |   |                      | -   |   |                      | -   |   |                      |
| 1 | <a href="#">128</a> | 128  | -   |   |                      | -   |   |                      | -   |   |                      | -   |   |                      |
| 1 | <a href="#">129</a> | 504  | uni | 1 | <a href="#">2202</a> | uni | 1 | <a href="#">1720</a> | uni | 1 | <a href="#">769</a>  | uni | 1 | <a href="#">1718</a> |
| 1 | <a href="#">130</a> | 178  | -   |   |                      | -   |   |                      | -   |   |                      | -   |   |                      |
| 1 | <a href="#">131</a> | 96   | -   |   |                      | -   |   |                      | -   |   |                      | -   |   |                      |
| 1 | <a href="#">132</a> | 135  | -   |   |                      | -   |   |                      | -   |   |                      | -   |   |                      |
| 1 | <a href="#">133</a> | 448  | uni | 1 | <a href="#">2481</a> | uni | 1 | <a href="#">1999</a> | uni | 1 | <a href="#">772</a>  | -   |   |                      |
| 1 | <a href="#">134</a> | 205  | -   |   |                      | -   |   |                      | -   |   |                      | -   |   |                      |
| 1 | <a href="#">135</a> | 102  | uni | 3 | <a href="#">2938</a> | bi  | 1 | <a href="#">1852</a> | -   |   |                      | -   |   |                      |
| 1 | <a href="#">136</a> | 902  | uni | 4 | <a href="#">3045</a> | -   |   |                      | -   |   |                      | -   |   |                      |
| 1 | <a href="#">137</a> | 47   | -   |   |                      | -   |   |                      | -   |   |                      | -   |   |                      |
| 1 | <a href="#">138</a> | 1306 | uni | 3 | <a href="#">2942</a> | -   |   |                      | -   |   |                      | uni | 1 | <a href="#">397</a>  |
| 1 | <a href="#">139</a> | 286  | -   |   |                      | -   |   |                      | -   |   |                      | -   |   |                      |
| 1 | <a href="#">140</a> | 185  | -   |   |                      | -   |   |                      | -   |   |                      | -   |   |                      |
| 1 | <a href="#">141</a> | 148  | -   |   |                      | -   |   |                      | -   |   |                      | -   |   |                      |
| 1 | <a href="#">142</a> | 283  | uni | 4 | <a href="#">3038</a> | -   |   |                      | -   |   |                      | uni | 1 | <a href="#">395</a>  |
| 1 | <a href="#">143</a> | 330  | uni | 4 | <a href="#">3033</a> | -   |   |                      | -   |   |                      | -   |   |                      |
| 1 | <a href="#">144</a> | 75   | -   |   |                      | -   |   |                      | -   |   |                      | -   |   |                      |
| 1 | <a href="#">145</a> | 130  | -   |   |                      | -   |   |                      | -   |   |                      | -   |   |                      |
| 1 | <a href="#">146</a> | 73   | bi  | 2 | <a href="#">2927</a> | -   |   |                      | -   |   |                      | -   |   |                      |
| 1 | <a href="#">147</a> | 836  | uni | 4 | <a href="#">3028</a> | -   |   |                      | uni | 1 | <a href="#">780</a>  | -   |   |                      |
| 1 | <a href="#">148</a> | 655  | -   |   |                      | -   |   |                      | -   |   |                      | -   |   |                      |
| 1 | <a href="#">149</a> | 346  | uni | 1 | <a href="#">2305</a> | uni | 3 | <a href="#">2989</a> | -   |   |                      | uni | 1 | <a href="#">386</a>  |
| 1 | <a href="#">150</a> | 97   | -   |   |                      | -   |   |                      | -   |   |                      | bi  | 1 | <a href="#">379</a>  |
| 1 | <a href="#">151</a> | 75   | -   |   |                      | -   |   |                      | -   |   |                      | -   |   |                      |
| 1 | <a href="#">152</a> | 173  | -   |   |                      | -   |   |                      | -   |   |                      | -   |   |                      |
| 1 | <a href="#">153</a> | 125  | -   |   |                      | -   |   |                      | -   |   |                      | -   |   |                      |
| 1 | <a href="#">154</a> | 71   | bi  | 1 | <a href="#">529</a>  | -   |   |                      | -   |   |                      | -   |   |                      |
| 1 | <a href="#">155</a> | 389  | bi  | 1 | <a href="#">530</a>  | uni | 1 | <a href="#">1841</a> | uni | 1 | <a href="#">1321</a> | uni | 1 | <a href="#">2361</a> |
| 1 | <a href="#">156</a> | 521  | bi  | 1 | <a href="#">531</a>  | bi  | 1 | <a href="#">118</a>  | bi  | 1 | <a href="#">112</a>  | bi  | 1 | <a href="#">115</a>  |

|   |                     |     |     |   |                      |     |   |                     |     |   |                      |     |   |                     |
|---|---------------------|-----|-----|---|----------------------|-----|---|---------------------|-----|---|----------------------|-----|---|---------------------|
| 1 | <a href="#">157</a> | 308 | bi  | 1 | <a href="#">532</a>  | bi  | 1 | <a href="#">119</a> | bi  | 1 | <a href="#">113</a>  | bi  | 1 | <a href="#">116</a> |
| 1 | <a href="#">158</a> | 196 | bi  | 1 | <a href="#">533</a>  | bi  | 1 | <a href="#">120</a> | bi  | 1 | <a href="#">114</a>  | bi  | 1 | <a href="#">117</a> |
| 1 | <a href="#">159</a> | 203 | bi  | 1 | <a href="#">534</a>  | bi  | 1 | <a href="#">121</a> | bi  | 1 | <a href="#">115</a>  | bi  | 1 | <a href="#">118</a> |
| 1 | <a href="#">160</a> | 338 | bi  | 1 | <a href="#">535</a>  | bi  | 1 | <a href="#">122</a> | bi  | 1 | <a href="#">116</a>  | bi  | 1 | <a href="#">119</a> |
| 1 | <a href="#">161</a> | 336 | bi  | 1 | <a href="#">536</a>  | bi  | 1 | <a href="#">123</a> | bi  | 1 | <a href="#">117</a>  | bi  | 1 | <a href="#">120</a> |
| 1 | <a href="#">162</a> | 434 | bi  | 1 | <a href="#">537</a>  | bi  | 1 | <a href="#">125</a> | bi  | 1 | <a href="#">118</a>  | bi  | 1 | <a href="#">121</a> |
| 1 | <a href="#">163</a> | 221 | bi  | 1 | <a href="#">538</a>  | bi  | 1 | <a href="#">126</a> | bi  | 1 | <a href="#">119</a>  | bi  | 1 | <a href="#">122</a> |
| 1 | <a href="#">164</a> | 132 | bi  | 1 | <a href="#">539</a>  | bi  | 1 | <a href="#">127</a> | bi  | 1 | <a href="#">120</a>  | bi  | 1 | <a href="#">123</a> |
| 1 | <a href="#">165</a> | 358 | bi  | 1 | <a href="#">540</a>  | bi  | 1 | <a href="#">128</a> | bi  | 1 | <a href="#">121</a>  | bi  | 1 | <a href="#">124</a> |
| 1 | <a href="#">166</a> | 362 | bi  | 1 | <a href="#">541</a>  | bi  | 1 | <a href="#">129</a> | bi  | 1 | <a href="#">122</a>  | bi  | 1 | <a href="#">125</a> |
| 1 | <a href="#">167</a> | 523 | bi  | 1 | <a href="#">542</a>  | bi  | 1 | <a href="#">130</a> | bi  | 1 | <a href="#">123</a>  | bi  | 1 | <a href="#">126</a> |
| 1 | <a href="#">168</a> | 381 | bi  | 1 | <a href="#">543</a>  | bi  | 1 | <a href="#">131</a> | bi  | 1 | <a href="#">124</a>  | bi  | 1 | <a href="#">127</a> |
| 1 | <a href="#">169</a> | 318 | bi  | 1 | <a href="#">544</a>  | bi  | 1 | <a href="#">132</a> | bi  | 1 | <a href="#">125</a>  | bi  | 1 | <a href="#">128</a> |
| 1 | <a href="#">170</a> | 97  | bi  | 4 | <a href="#">3002</a> | bi  | 1 | <a href="#">133</a> | uni | 1 | <a href="#">1104</a> | bi  | 1 | <a href="#">129</a> |
| 1 | <a href="#">171</a> | 104 | uni | 4 | <a href="#">3002</a> | uni | 1 | <a href="#">133</a> | -   |   |                      | uni | 1 | <a href="#">129</a> |
| 1 | <a href="#">172</a> | 389 | bi  | 1 | <a href="#">551</a>  | bi  | 1 | <a href="#">134</a> | bi  | 1 | <a href="#">131</a>  | bi  | 1 | <a href="#">130</a> |
| 1 | <a href="#">173</a> | 273 | bi  | 1 | <a href="#">552</a>  | bi  | 1 | <a href="#">135</a> | bi  | 1 | <a href="#">132</a>  | bi  | 1 | <a href="#">131</a> |
| 1 | <a href="#">174</a> | 236 | bi  | 1 | <a href="#">553</a>  | bi  | 1 | <a href="#">136</a> | bi  | 1 | <a href="#">133</a>  | bi  | 1 | <a href="#">132</a> |
| 1 | <a href="#">175</a> | 313 | bi  | 1 | <a href="#">554</a>  | bi  | 1 | <a href="#">137</a> | bi  | 1 | <a href="#">134</a>  | bi  | 1 | <a href="#">133</a> |
| 1 | <a href="#">176</a> | 267 | bi  | 1 | <a href="#">555</a>  | bi  | 1 | <a href="#">138</a> | bi  | 1 | <a href="#">135</a>  | bi  | 1 | <a href="#">134</a> |
| 1 | <a href="#">177</a> | 337 | bi  | 1 | <a href="#">556</a>  | bi  | 1 | <a href="#">139</a> | bi  | 1 | <a href="#">136</a>  | bi  | 1 | <a href="#">135</a> |
| 1 | <a href="#">178</a> | 335 | bi  | 1 | <a href="#">557</a>  | bi  | 1 | <a href="#">140</a> | bi  | 1 | <a href="#">137</a>  | bi  | 1 | <a href="#">136</a> |
| 1 | <a href="#">179</a> | 396 | bi  | 1 | <a href="#">558</a>  | bi  | 1 | <a href="#">141</a> | bi  | 1 | <a href="#">138</a>  | bi  | 1 | <a href="#">137</a> |
| 1 | <a href="#">180</a> | 229 | bi  | 1 | <a href="#">559</a>  | bi  | 1 | <a href="#">142</a> | bi  | 1 | <a href="#">139</a>  | bi  | 1 | <a href="#">138</a> |
| 1 | <a href="#">181</a> | 192 | bi  | 1 | <a href="#">560</a>  | bi  | 1 | <a href="#">143</a> | bi  | 1 | <a href="#">140</a>  | bi  | 1 | <a href="#">139</a> |
| 1 | <a href="#">182</a> | 227 | bi  | 1 | <a href="#">561</a>  | bi  | 1 | <a href="#">144</a> | bi  | 1 | <a href="#">141</a>  | bi  | 1 | <a href="#">140</a> |
| 1 | <a href="#">183</a> | 138 | bi  | 1 | <a href="#">562</a>  | bi  | 1 | <a href="#">145</a> | bi  | 1 | <a href="#">142</a>  | bi  | 1 | <a href="#">141</a> |
| 1 | <a href="#">184</a> | 157 | bi  | 1 | <a href="#">563</a>  | bi  | 1 | <a href="#">146</a> | bi  | 1 | <a href="#">143</a>  | bi  | 1 | <a href="#">142</a> |
| 1 | <a href="#">185</a> | 694 | bi  | 1 | <a href="#">564</a>  | bi  | 1 | <a href="#">147</a> | bi  | 1 | <a href="#">144</a>  | bi  | 1 | <a href="#">143</a> |
| 1 | <a href="#">186</a> | 396 | bi  | 1 | <a href="#">565</a>  | bi  | 1 | <a href="#">148</a> | bi  | 1 | <a href="#">145</a>  | bi  | 1 | <a href="#">144</a> |
| 1 | <a href="#">187</a> | 275 | bi  | 1 | <a href="#">566</a>  | bi  | 1 | <a href="#">149</a> | bi  | 1 | <a href="#">146</a>  | bi  | 1 | <a href="#">145</a> |
| 1 | <a href="#">188</a> | 389 | bi  | 1 | <a href="#">567</a>  | bi  | 1 | <a href="#">150</a> | bi  | 1 | <a href="#">147</a>  | bi  | 1 | <a href="#">146</a> |
| 1 | <a href="#">189</a> | 103 | bi  | 1 | <a href="#">568</a>  | bi  | 1 | <a href="#">151</a> | bi  | 1 | <a href="#">148</a>  | bi  | 1 | <a href="#">148</a> |
| 1 | <a href="#">190</a> | 210 | bi  | 1 | <a href="#">569</a>  | bi  | 1 | <a href="#">152</a> | bi  | 1 | <a href="#">149</a>  | bi  | 1 | <a href="#">149</a> |
| 1 | <a href="#">191</a> | 208 | bi  | 1 | <a href="#">570</a>  | bi  | 1 | <a href="#">153</a> | bi  | 1 | <a href="#">150</a>  | bi  | 1 | <a href="#">150</a> |
| 1 | <a href="#">192</a> | 97  | bi  | 1 | <a href="#">571</a>  | bi  | 1 | <a href="#">154</a> | bi  | 1 | <a href="#">151</a>  | bi  | 1 | <a href="#">151</a> |
| 1 | <a href="#">193</a> | 277 | bi  | 1 | <a href="#">572</a>  | bi  | 1 | <a href="#">155</a> | bi  | 1 | <a href="#">152</a>  | bi  | 1 | <a href="#">152</a> |
| 1 | <a href="#">194</a> | 93  | bi  | 1 | <a href="#">573</a>  | bi  | 1 | <a href="#">156</a> | bi  | 1 | <a href="#">153</a>  | bi  | 1 | <a href="#">153</a> |
| 1 | <a href="#">195</a> | 116 | bi  | 1 | <a href="#">574</a>  | bi  | 1 | <a href="#">157</a> | bi  | 1 | <a href="#">154</a>  | bi  | 1 | <a href="#">154</a> |
| 1 | <a href="#">196</a> | 219 | bi  | 1 | <a href="#">575</a>  | bi  | 1 | <a href="#">158</a> | bi  | 1 | <a href="#">155</a>  | bi  | 1 | <a href="#">155</a> |
| 1 | <a href="#">197</a> | 145 | bi  | 1 | <a href="#">576</a>  | bi  | 1 | <a href="#">159</a> | bi  | 1 | <a href="#">156</a>  | bi  | 1 | <a href="#">156</a> |
| 1 | <a href="#">198</a> | 63  | bi  | 1 | <a href="#">577</a>  | bi  | 1 | <a href="#">160</a> | bi  | 1 | <a href="#">157</a>  | bi  | 1 | <a href="#">157</a> |
| 1 | <a href="#">199</a> | 89  | bi  | 1 | <a href="#">578</a>  | bi  | 1 | <a href="#">161</a> | bi  | 1 | <a href="#">158</a>  | bi  | 1 | <a href="#">158</a> |
| 1 | <a href="#">200</a> | 123 | bi  | 1 | <a href="#">579</a>  | bi  | 1 | <a href="#">162</a> | bi  | 1 | <a href="#">159</a>  | bi  | 1 | <a href="#">159</a> |
| 1 | <a href="#">201</a> | 104 | bi  | 1 | <a href="#">580</a>  | bi  | 1 | <a href="#">163</a> | bi  | 1 | <a href="#">160</a>  | bi  | 1 | <a href="#">160</a> |
| 1 | <a href="#">202</a> | 180 | bi  | 1 | <a href="#">581</a>  | bi  | 1 | <a href="#">164</a> | bi  | 1 | <a href="#">161</a>  | bi  | 1 | <a href="#">161</a> |
| 1 | <a href="#">203</a> | 62  | bi  | 1 | <a href="#">582</a>  | bi  | 1 | <a href="#">165</a> | bi  | 1 | <a href="#">162</a>  | bi  | 1 | <a href="#">162</a> |
| 1 | <a href="#">204</a> | 133 | bi  | 1 | <a href="#">583</a>  | bi  | 1 | <a href="#">166</a> | bi  | 1 | <a href="#">163</a>  | bi  | 1 | <a href="#">163</a> |
| 1 | <a href="#">205</a> | 179 | bi  | 1 | <a href="#">584</a>  | bi  | 1 | <a href="#">167</a> | bi  | 1 | <a href="#">164</a>  | bi  | 1 | <a href="#">164</a> |
| 1 | <a href="#">206</a> | 119 | bi  | 1 | <a href="#">585</a>  | bi  | 1 | <a href="#">168</a> | bi  | 1 | <a href="#">165</a>  | bi  | 1 | <a href="#">165</a> |
| 1 | <a href="#">207</a> | 167 | bi  | 1 | <a href="#">586</a>  | bi  | 1 | <a href="#">169</a> | bi  | 1 | <a href="#">166</a>  | bi  | 1 | <a href="#">166</a> |
| 1 | <a href="#">208</a> | 60  | bi  | 1 | <a href="#">587</a>  | bi  | 1 | <a href="#">170</a> | bi  | 1 | <a href="#">167</a>  | bi  | 1 | <a href="#">167</a> |
| 1 | <a href="#">209</a> | 147 | bi  | 1 | <a href="#">588</a>  | bi  | 1 | <a href="#">171</a> | bi  | 1 | <a href="#">168</a>  | bi  | 1 | <a href="#">168</a> |
| 1 | <a href="#">210</a> | 433 | bi  | 1 | <a href="#">589</a>  | bi  | 1 | <a href="#">172</a> | bi  | 1 | <a href="#">169</a>  | bi  | 1 | <a href="#">169</a> |
| 1 | <a href="#">211</a> | 217 | bi  | 1 | <a href="#">590</a>  | bi  | 1 | <a href="#">173</a> | bi  | 1 | <a href="#">170</a>  | bi  | 1 | <a href="#">170</a> |
| 1 | <a href="#">212</a> | 73  | bi  | 1 | <a href="#">591</a>  | bi  | 1 | <a href="#">174</a> | bi  | 1 | <a href="#">171</a>  | bi  | 1 | <a href="#">171</a> |
| 1 | <a href="#">213</a> | 39  | bi  | 1 | <a href="#">592</a>  | bi  | 1 | <a href="#">175</a> | bi  | 1 | <a href="#">172</a>  | bi  | 1 | <a href="#">172</a> |

|   |                      |      |     |   |                     |     |   |                     |     |   |                     |     |   |                      |
|---|----------------------|------|-----|---|---------------------|-----|---|---------------------|-----|---|---------------------|-----|---|----------------------|
| 1 | <a href="#">214</a>  | 122  | bi  | 1 | <a href="#">593</a> | bi  | 1 | <a href="#">176</a> | bi  | 1 | <a href="#">173</a> | bi  | 1 | <a href="#">173</a>  |
| 1 | <a href="#">215</a>  | 130  | bi  | 1 | <a href="#">594</a> | bi  | 1 | <a href="#">177</a> | bi  | 1 | <a href="#">174</a> | bi  | 1 | <a href="#">174</a>  |
| 1 | <a href="#">216</a>  | 313  | bi  | 1 | <a href="#">595</a> | bi  | 1 | <a href="#">178</a> | bi  | 1 | <a href="#">175</a> | bi  | 1 | <a href="#">175</a>  |
| 1 | <a href="#">217</a>  | 128  | bi  | 1 | <a href="#">596</a> | bi  | 1 | <a href="#">179</a> | bi  | 1 | <a href="#">176</a> | bi  | 1 | <a href="#">176</a>  |
| 1 | <a href="#">218</a>  | 400  | bi  | 1 | <a href="#">597</a> | bi  | 1 | <a href="#">180</a> | bi  | 1 | <a href="#">177</a> | bi  | 1 | <a href="#">177</a>  |
| 1 | <a href="#">219</a>  | 378  | bi  | 1 | <a href="#">598</a> | bi  | 1 | <a href="#">181</a> | bi  | 1 | <a href="#">178</a> | bi  | 1 | <a href="#">178</a>  |
| 1 | <a href="#">220</a>  | 280  | bi  | 1 | <a href="#">599</a> | bi  | 1 | <a href="#">182</a> | bi  | 1 | <a href="#">179</a> | bi  | 1 | <a href="#">179</a>  |
| 1 | <a href="#">221</a>  | 292  | bi  | 1 | <a href="#">600</a> | bi  | 1 | <a href="#">183</a> | bi  | 1 | <a href="#">180</a> | bi  | 1 | <a href="#">180</a>  |
| 1 | <a href="#">222</a>  | 266  | bi  | 1 | <a href="#">601</a> | bi  | 1 | <a href="#">184</a> | bi  | 1 | <a href="#">181</a> | bi  | 1 | <a href="#">181</a>  |
| 1 | <a href="#">3266</a> | 250  | bi  | 1 | <a href="#">602</a> | bi  | 1 | <a href="#">185</a> | bi  | 1 | <a href="#">182</a> | bi  | 1 | <a href="#">182</a>  |
| 1 | <a href="#">223</a>  | 104  | bi  | 1 | <a href="#">603</a> | bi  | 1 | <a href="#">186</a> | bi  | 1 | <a href="#">183</a> | bi  | 1 | <a href="#">183</a>  |
| 1 | <a href="#">224</a>  | 452  | bi  | 1 | <a href="#">604</a> | bi  | 1 | <a href="#">187</a> | bi  | 1 | <a href="#">184</a> | bi  | 1 | <a href="#">184</a>  |
| 1 | <a href="#">225</a>  | 164  | bi  | 1 | <a href="#">605</a> | bi  | 1 | <a href="#">188</a> | bi  | 1 | <a href="#">185</a> | bi  | 1 | <a href="#">185</a>  |
| 1 | <a href="#">226</a>  | 192  | bi  | 1 | <a href="#">606</a> | bi  | 1 | <a href="#">189</a> | bi  | 1 | <a href="#">186</a> | bi  | 1 | <a href="#">186</a>  |
| 1 | <a href="#">227</a>  | 247  | bi  | 1 | <a href="#">607</a> | bi  | 1 | <a href="#">190</a> | bi  | 1 | <a href="#">187</a> | bi  | 1 | <a href="#">187</a>  |
| 1 | <a href="#">228</a>  | 528  | bi  | 1 | <a href="#">608</a> | bi  | 1 | <a href="#">191</a> | bi  | 1 | <a href="#">188</a> | bi  | 1 | <a href="#">188</a>  |
| 1 | <a href="#">229</a>  | 99   | bi  | 1 | <a href="#">609</a> | bi  | 1 | <a href="#">192</a> | bi  | 1 | <a href="#">189</a> | bi  | 1 | <a href="#">189</a>  |
| 1 | <a href="#">230</a>  | 238  | bi  | 1 | <a href="#">610</a> | bi  | 1 | <a href="#">193</a> | bi  | 1 | <a href="#">190</a> | bi  | 1 | <a href="#">190</a>  |
| 1 | <a href="#">231</a>  | 282  | bi  | 1 | <a href="#">611</a> | bi  | 1 | <a href="#">194</a> | bi  | 1 | <a href="#">191</a> | bi  | 1 | <a href="#">191</a>  |
| 1 | <a href="#">232</a>  | 171  | bi  | 1 | <a href="#">612</a> | bi  | 1 | <a href="#">195</a> | bi  | 1 | <a href="#">192</a> | bi  | 1 | <a href="#">192</a>  |
| 1 | <a href="#">233</a>  | 504  | bi  | 1 | <a href="#">613</a> | bi  | 1 | <a href="#">196</a> | bi  | 1 | <a href="#">193</a> | bi  | 1 | <a href="#">193</a>  |
| 1 | <a href="#">234</a>  | 497  | bi  | 1 | <a href="#">614</a> | bi  | 1 | <a href="#">197</a> | bi  | 1 | <a href="#">194</a> | bi  | 1 | <a href="#">194</a>  |
| 1 | <a href="#">235</a>  | 328  | bi  | 1 | <a href="#">615</a> | bi  | 1 | <a href="#">198</a> | bi  | 1 | <a href="#">195</a> | bi  | 1 | <a href="#">195</a>  |
| 1 | <a href="#">236</a>  | 189  | bi  | 1 | <a href="#">616</a> | bi  | 1 | <a href="#">199</a> | bi  | 1 | <a href="#">196</a> | bi  | 1 | <a href="#">196</a>  |
| 1 | <a href="#">237</a>  | 1190 | bi  | 1 | <a href="#">617</a> | bi  | 1 | <a href="#">200</a> | bi  | 1 | <a href="#">197</a> | bi  | 1 | <a href="#">197</a>  |
| 1 | <a href="#">238</a>  | 530  | bi  | 1 | <a href="#">618</a> | bi  | 1 | <a href="#">201</a> | bi  | 1 | <a href="#">198</a> | bi  | 1 | <a href="#">198</a>  |
| 1 | <a href="#">239</a>  | 88   | bi  | 1 | <a href="#">619</a> | bi  | 1 | <a href="#">202</a> | bi  | 1 | <a href="#">199</a> | bi  | 1 | <a href="#">199</a>  |
| 1 | <a href="#">240</a>  | 56   | bi  | 1 | <a href="#">620</a> | bi  | 1 | <a href="#">203</a> | bi  | 1 | <a href="#">200</a> | bi  | 1 | <a href="#">200</a>  |
| 1 | <a href="#">241</a>  | 160  | bi  | 1 | <a href="#">621</a> | bi  | 1 | <a href="#">204</a> | bi  | 1 | <a href="#">201</a> | bi  | 1 | <a href="#">201</a>  |
| 1 | <a href="#">242</a>  | 160  | bi  | 1 | <a href="#">622</a> | bi  | 1 | <a href="#">205</a> | bi  | 1 | <a href="#">202</a> | bi  | 1 | <a href="#">202</a>  |
| 1 | <a href="#">243</a>  | 463  | bi  | 1 | <a href="#">623</a> | bi  | 1 | <a href="#">206</a> | bi  | 1 | <a href="#">203</a> | bi  | 1 | <a href="#">203</a>  |
| 1 | <a href="#">244</a>  | 182  | bi  | 1 | <a href="#">624</a> | bi  | 1 | <a href="#">207</a> | bi  | 1 | <a href="#">204</a> | bi  | 1 | <a href="#">204</a>  |
| 1 | <a href="#">245</a>  | 719  | bi  | 1 | <a href="#">625</a> | bi  | 1 | <a href="#">208</a> | bi  | 1 | <a href="#">205</a> | bi  | 1 | <a href="#">205</a>  |
| 1 | <a href="#">246</a>  | 299  | bi  | 1 | <a href="#">626</a> | bi  | 1 | <a href="#">209</a> | bi  | 1 | <a href="#">206</a> | bi  | 1 | <a href="#">206</a>  |
| 1 | <a href="#">247</a>  | 333  | bi  | 1 | <a href="#">627</a> | bi  | 1 | <a href="#">210</a> | bi  | 1 | <a href="#">207</a> | bi  | 1 | <a href="#">207</a>  |
| 1 | <a href="#">248</a>  | 499  | bi  | 1 | <a href="#">628</a> | bi  | 1 | <a href="#">211</a> | bi  | 1 | <a href="#">208</a> | bi  | 1 | <a href="#">208</a>  |
| 1 | <a href="#">3267</a> | 208  | bi  | 1 | <a href="#">630</a> | bi  | 1 | <a href="#">213</a> | bi  | 1 | <a href="#">209</a> | uni | 1 | <a href="#">2075</a> |
| 1 | <a href="#">3268</a> | 38   | uni | 1 | <a href="#">630</a> | -   |   |                     | uni | 1 | <a href="#">209</a> | -   |   |                      |
| 1 | <a href="#">249</a>  | 633  | bi  | 1 | <a href="#">631</a> | uni | 1 | <a href="#">213</a> | bi  | 1 | <a href="#">210</a> | bi  | 1 | <a href="#">209</a>  |
| 1 | <a href="#">250</a>  | 477  | bi  | 1 | <a href="#">632</a> | bi  | 1 | <a href="#">214</a> | bi  | 1 | <a href="#">211</a> | bi  | 1 | <a href="#">210</a>  |
| 1 | <a href="#">251</a>  | 489  | bi  | 1 | <a href="#">633</a> | bi  | 1 | <a href="#">215</a> | bi  | 1 | <a href="#">212</a> | bi  | 1 | <a href="#">211</a>  |
| 1 | <a href="#">252</a>  | 273  | bi  | 1 | <a href="#">634</a> | bi  | 1 | <a href="#">216</a> | bi  | 1 | <a href="#">213</a> | bi  | 1 | <a href="#">212</a>  |
| 1 | <a href="#">253</a>  | 248  | bi  | 1 | <a href="#">635</a> | bi  | 1 | <a href="#">217</a> | bi  | 1 | <a href="#">214</a> | bi  | 1 | <a href="#">215</a>  |
| 1 | <a href="#">254</a>  | 189  | bi  | 1 | <a href="#">636</a> | bi  | 1 | <a href="#">218</a> | bi  | 1 | <a href="#">215</a> | bi  | 1 | <a href="#">216</a>  |
| 1 | <a href="#">255</a>  | 144  | bi  | 1 | <a href="#">637</a> | bi  | 1 | <a href="#">219</a> | bi  | 1 | <a href="#">216</a> | bi  | 1 | <a href="#">217</a>  |
| 1 | <a href="#">256</a>  | 171  | bi  | 1 | <a href="#">638</a> | bi  | 1 | <a href="#">220</a> | bi  | 1 | <a href="#">217</a> | bi  | 1 | <a href="#">218</a>  |
| 1 | <a href="#">257</a>  | 225  | bi  | 1 | <a href="#">639</a> | bi  | 1 | <a href="#">221</a> | bi  | 1 | <a href="#">218</a> | bi  | 1 | <a href="#">219</a>  |
| 1 | <a href="#">258</a>  | 312  | bi  | 1 | <a href="#">640</a> | bi  | 1 | <a href="#">222</a> | bi  | 1 | <a href="#">219</a> | bi  | 1 | <a href="#">220</a>  |
| 1 | <a href="#">259</a>  | 133  | bi  | 1 | <a href="#">641</a> | bi  | 1 | <a href="#">223</a> | bi  | 1 | <a href="#">220</a> | bi  | 1 | <a href="#">221</a>  |
| 1 | <a href="#">260</a>  | 251  | bi  | 1 | <a href="#">642</a> | bi  | 1 | <a href="#">224</a> | bi  | 1 | <a href="#">221</a> | bi  | 1 | <a href="#">222</a>  |
| 1 | <a href="#">261</a>  | 413  | bi  | 1 | <a href="#">643</a> | bi  | 1 | <a href="#">225</a> | bi  | 1 | <a href="#">222</a> | bi  | 1 | <a href="#">223</a>  |
| 1 | <a href="#">262</a>  | 145  | bi  | 1 | <a href="#">644</a> | bi  | 1 | <a href="#">226</a> | bi  | 1 | <a href="#">223</a> | bi  | 1 | <a href="#">224</a>  |
| 1 | <a href="#">263</a>  | 312  | bi  | 1 | <a href="#">646</a> | bi  | 1 | <a href="#">227</a> | bi  | 1 | <a href="#">224</a> | bi  | 1 | <a href="#">226</a>  |
| 1 | <a href="#">264</a>  | 216  | bi  | 1 | <a href="#">647</a> | bi  | 1 | <a href="#">228</a> | bi  | 1 | <a href="#">226</a> | bi  | 1 | <a href="#">227</a>  |
| 1 | <a href="#">265</a>  | 187  | bi  | 1 | <a href="#">648</a> | bi  | 1 | <a href="#">229</a> | bi  | 1 | <a href="#">227</a> | bi  | 1 | <a href="#">228</a>  |
| 1 | <a href="#">266</a>  | 46   | bi  | 1 | <a href="#">649</a> | bi  | 1 | <a href="#">230</a> | bi  | 1 | <a href="#">228</a> | bi  | 1 | <a href="#">229</a>  |
| 1 | <a href="#">267</a>  | 306  | bi  | 1 | <a href="#">650</a> | bi  | 1 | <a href="#">231</a> | bi  | 1 | <a href="#">229</a> | bi  | 1 | <a href="#">230</a>  |

|   |                     |     |     |   |                      |    |   |                      |     |   |                      |     |   |                      |
|---|---------------------|-----|-----|---|----------------------|----|---|----------------------|-----|---|----------------------|-----|---|----------------------|
| 1 | <a href="#">268</a> | 379 | bi  | 1 | <a href="#">651</a>  | bi | 1 | <a href="#">232</a>  | bi  | 1 | <a href="#">230</a>  | bi  | 1 | <a href="#">231</a>  |
| 1 | <a href="#">269</a> | 477 | bi  | 1 | <a href="#">652</a>  | bi | 1 | <a href="#">233</a>  | bi  | 1 | <a href="#">231</a>  | bi  | 1 | <a href="#">232</a>  |
| 1 | <a href="#">270</a> | 445 | bi  | 1 | <a href="#">653</a>  | bi | 1 | <a href="#">234</a>  | bi  | 1 | <a href="#">232</a>  | bi  | 1 | <a href="#">233</a>  |
| 1 | <a href="#">271</a> | 254 | bi  | 1 | <a href="#">654</a>  | bi | 1 | <a href="#">235</a>  | bi  | 1 | <a href="#">233</a>  | bi  | 1 | <a href="#">234</a>  |
| 1 | <a href="#">272</a> | 181 | bi  | 1 | <a href="#">655</a>  | bi | 1 | <a href="#">236</a>  | bi  | 1 | <a href="#">234</a>  | bi  | 1 | <a href="#">235</a>  |
| 1 | <a href="#">273</a> | 456 | bi  | 1 | <a href="#">656</a>  | bi | 1 | <a href="#">237</a>  | bi  | 1 | <a href="#">235</a>  | bi  | 1 | <a href="#">236</a>  |
| 1 | <a href="#">274</a> | 388 | bi  | 1 | <a href="#">657</a>  | bi | 1 | <a href="#">238</a>  | bi  | 1 | <a href="#">236</a>  | bi  | 1 | <a href="#">237</a>  |
| 1 | <a href="#">275</a> | 147 | bi  | 1 | <a href="#">658</a>  | bi | 1 | <a href="#">239</a>  | bi  | 1 | <a href="#">237</a>  | bi  | 1 | <a href="#">238</a>  |
| 1 | <a href="#">276</a> | 829 | bi  | 1 | <a href="#">659</a>  | bi | 1 | <a href="#">240</a>  | bi  | 1 | <a href="#">238</a>  | bi  | 1 | <a href="#">239</a>  |
| 1 | <a href="#">277</a> | 69  | bi  | 1 | <a href="#">660</a>  | bi | 1 | <a href="#">241</a>  | bi  | 1 | <a href="#">239</a>  | bi  | 1 | <a href="#">240</a>  |
| 1 | <a href="#">278</a> | 457 | bi  | 1 | <a href="#">661</a>  | bi | 1 | <a href="#">242</a>  | bi  | 1 | <a href="#">240</a>  | bi  | 1 | <a href="#">241</a>  |
| 1 | <a href="#">279</a> | 130 | bi  | 1 | <a href="#">662</a>  | bi | 1 | <a href="#">243</a>  | bi  | 1 | <a href="#">241</a>  | bi  | 1 | <a href="#">242</a>  |
| 1 | <a href="#">280</a> | 462 | bi  | 1 | <a href="#">663</a>  | bi | 1 | <a href="#">244</a>  | bi  | 1 | <a href="#">242</a>  | bi  | 1 | <a href="#">243</a>  |
| 1 | <a href="#">281</a> | 405 | uni | 1 | <a href="#">1861</a> | bi | 1 | <a href="#">245</a>  | uni | 1 | <a href="#">1219</a> | uni | 1 | <a href="#">1546</a> |
| 1 | <a href="#">282</a> | 177 | -   |   |                      | bi | 1 | <a href="#">246</a>  | -   |   |                      | -   |   |                      |
| 1 | <a href="#">283</a> | 226 | uni | 1 | <a href="#">2344</a> | bi | 1 | <a href="#">247</a>  | -   |   |                      | -   |   |                      |
| 1 | <a href="#">284</a> | 121 | uni | 1 | <a href="#">1316</a> | bi | 1 | <a href="#">248</a>  | -   |   |                      | -   |   |                      |
| 1 | <a href="#">285</a> | 71  | -   |   |                      | bi | 1 | <a href="#">249</a>  | -   |   |                      | -   |   |                      |
| 1 | <a href="#">286</a> | 112 | -   |   |                      | bi | 1 | <a href="#">250</a>  | -   |   |                      | -   |   |                      |
| 1 | <a href="#">287</a> | 91  | -   |   |                      | bi | 1 | <a href="#">251</a>  | -   |   |                      | bi  | 1 | <a href="#">1856</a> |
| 1 | <a href="#">288</a> | 47  | -   |   |                      | bi | 1 | <a href="#">252</a>  | -   |   |                      | bi  | 1 | <a href="#">1536</a> |
| 1 | <a href="#">289</a> | 67  | -   |   |                      | bi | 1 | <a href="#">253</a>  | -   |   |                      | -   |   |                      |
| 1 | <a href="#">290</a> | 73  | -   |   |                      | -  |   |                      | -   |   |                      | -   |   |                      |
| 1 | <a href="#">291</a> | 60  | -   |   |                      | bi | 1 | <a href="#">2480</a> | -   |   |                      | bi  | 1 | <a href="#">1855</a> |
| 1 | <a href="#">292</a> | 65  | -   |   |                      | bi | 1 | <a href="#">255</a>  | -   |   |                      | -   |   |                      |
| 1 | <a href="#">293</a> | 230 | -   |   |                      | bi | 1 | <a href="#">256</a>  | -   |   |                      | -   |   |                      |
| 1 | <a href="#">294</a> | 84  | -   |   |                      | -  |   |                      | -   |   |                      | -   |   |                      |
| 1 | <a href="#">295</a> | 64  | -   |   |                      | bi | 1 | <a href="#">257</a>  | -   |   |                      | -   |   |                      |
| 1 | <a href="#">296</a> | 160 | -   |   |                      | bi | 1 | <a href="#">258</a>  | -   |   |                      | -   |   |                      |
| 1 | <a href="#">297</a> | 391 | -   |   |                      | bi | 1 | <a href="#">259</a>  | -   |   |                      | -   |   |                      |
| 1 | <a href="#">298</a> | 83  | -   |   |                      | bi | 1 | <a href="#">260</a>  | -   |   |                      | -   |   |                      |
| 1 | <a href="#">299</a> | 110 | -   |   |                      | bi | 1 | <a href="#">261</a>  | -   |   |                      | -   |   |                      |
| 1 | <a href="#">300</a> | 192 | -   |   |                      | bi | 1 | <a href="#">262</a>  | -   |   |                      | -   |   |                      |
| 1 | <a href="#">301</a> | 74  | -   |   |                      | bi | 1 | <a href="#">263</a>  | -   |   |                      | -   |   |                      |
| 1 | <a href="#">302</a> | 183 | -   |   |                      | bi | 1 | <a href="#">264</a>  | -   |   |                      | -   |   |                      |
| 1 | <a href="#">303</a> | 654 | -   |   |                      | bi | 1 | <a href="#">265</a>  | -   |   |                      | -   |   |                      |
| 1 | <a href="#">304</a> | 80  | -   |   |                      | -  |   |                      | -   |   |                      | -   |   |                      |
| 1 | <a href="#">305</a> | 101 | -   |   |                      | -  |   |                      | -   |   |                      | -   |   |                      |
| 1 | <a href="#">306</a> | 813 | -   |   |                      | bi | 1 | <a href="#">267</a>  | -   |   |                      | -   |   |                      |
| 1 | <a href="#">307</a> | 107 | -   |   |                      | bi | 1 | <a href="#">268</a>  | -   |   |                      | -   |   |                      |
| 1 | <a href="#">308</a> | 458 | uni | 1 | <a href="#">2785</a> | bi | 1 | <a href="#">269</a>  | uni | 1 | <a href="#">2004</a> | uni | 1 | <a href="#">2158</a> |
| 1 | <a href="#">309</a> | 147 | -   |   |                      | bi | 1 | <a href="#">270</a>  | -   |   |                      | -   |   |                      |
| 1 | <a href="#">310</a> | 150 | -   |   |                      | bi | 1 | <a href="#">271</a>  | -   |   |                      | -   |   |                      |
| 1 | <a href="#">311</a> | 419 | -   |   |                      | bi | 1 | <a href="#">272</a>  | -   |   |                      | -   |   |                      |
| 1 | <a href="#">312</a> | 511 | -   |   |                      | bi | 1 | <a href="#">275</a>  | -   |   |                      | -   |   |                      |
| 1 | <a href="#">313</a> | 488 | uni | 1 | <a href="#">2319</a> | bi | 1 | <a href="#">276</a>  | -   |   |                      | -   |   |                      |
| 1 | <a href="#">314</a> | 68  | -   |   |                      | -  |   |                      | -   |   |                      | -   |   |                      |
| 1 | <a href="#">315</a> | 70  | -   |   |                      | bi | 1 | <a href="#">278</a>  | -   |   |                      | -   |   |                      |
| 1 | <a href="#">316</a> | 191 | -   |   |                      | bi | 1 | <a href="#">279</a>  | -   |   |                      | -   |   |                      |
| 1 | <a href="#">317</a> | 288 | -   |   |                      | bi | 1 | <a href="#">280</a>  | -   |   |                      | bi  | 1 | <a href="#">1507</a> |
| 1 | <a href="#">318</a> | 51  | -   |   |                      | bi | 1 | <a href="#">281</a>  | -   |   |                      | -   |   |                      |
| 1 | <a href="#">319</a> | 181 | -   |   |                      | bi | 1 | <a href="#">282</a>  | -   |   |                      | -   |   |                      |
| 1 | <a href="#">320</a> | 113 | -   |   |                      | bi | 1 | <a href="#">283</a>  | -   |   |                      | -   |   |                      |
| 1 | <a href="#">321</a> | 144 | -   |   |                      | bi | 1 | <a href="#">284</a>  | -   |   |                      | -   |   |                      |
| 1 | <a href="#">322</a> | 128 | -   |   |                      | bi | 1 | <a href="#">285</a>  | -   |   |                      | -   |   |                      |
| 1 | <a href="#">323</a> | 209 | -   |   |                      | bi | 1 | <a href="#">286</a>  | -   |   |                      | -   |   |                      |
| 1 | <a href="#">324</a> | 163 | -   |   |                      | -  |   |                      | -   |   |                      | -   |   |                      |



|   |                      |      |     |   |                      |     |   |                      |     |   |                      |     |   |                      |
|---|----------------------|------|-----|---|----------------------|-----|---|----------------------|-----|---|----------------------|-----|---|----------------------|
| 1 | <a href="#">3269</a> | 147  | -   |   |                      | bi  | 1 | <a href="#">287</a>  | -   |   |                      | -   |   |                      |
| 1 | <a href="#">325</a>  | 96   | -   |   |                      | bi  | 1 | <a href="#">288</a>  | -   |   |                      | -   |   |                      |
| 1 | <a href="#">326</a>  | 1050 | uni | 1 | <a href="#">2307</a> | bi  | 1 | <a href="#">289</a>  | uni | 1 | <a href="#">1025</a> | uni | 1 | <a href="#">1498</a> |
| 1 | <a href="#">327</a>  | 292  | -   |   |                      | bi  | 1 | <a href="#">290</a>  | -   |   |                      | -   |   |                      |
| 1 | <a href="#">328</a>  | 362  | -   |   |                      | bi  | 1 | <a href="#">291</a>  | -   |   |                      | -   |   |                      |
| 1 | <a href="#">329</a>  | 345  | bi  | 1 | <a href="#">1362</a> | bi  | 1 | <a href="#">292</a>  | -   |   |                      | -   |   |                      |
| 1 | <a href="#">330</a>  | 264  | -   |   |                      | bi  | 1 | <a href="#">293</a>  | -   |   |                      | -   |   |                      |
| 1 | <a href="#">331</a>  | 85   | -   |   |                      | bi  | 1 | <a href="#">294</a>  | -   |   |                      | uni | 1 | <a href="#">2337</a> |
| 1 | <a href="#">332</a>  | 69   | -   |   |                      | uni | 1 | <a href="#">2435</a> | -   |   |                      | uni | 1 | <a href="#">2336</a> |
| 1 | <a href="#">333</a>  | 434  | uni | 1 | <a href="#">2296</a> | bi  | 1 | <a href="#">2434</a> | uni | 1 | <a href="#">518</a>  | bi  | 1 | <a href="#">2335</a> |
| 1 | <a href="#">334</a>  | 42   | -   |   |                      | -   |   |                      | -   |   |                      | -   |   |                      |
| 1 | <a href="#">335</a>  | 207  | bi  | 1 | <a href="#">664</a>  | bi  | 1 | <a href="#">297</a>  | bi  | 1 | <a href="#">243</a>  | bi  | 1 | <a href="#">244</a>  |
| 1 | <a href="#">336</a>  | 325  | bi  | 1 | <a href="#">665</a>  | bi  | 1 | <a href="#">298</a>  | bi  | 1 | <a href="#">244</a>  | bi  | 1 | <a href="#">245</a>  |
| 1 | <a href="#">337</a>  | 112  | bi  | 1 | <a href="#">666</a>  | bi  | 1 | <a href="#">299</a>  | bi  | 1 | <a href="#">245</a>  | bi  | 1 | <a href="#">246</a>  |
| 1 | <a href="#">338</a>  | 104  | bi  | 1 | <a href="#">667</a>  | bi  | 1 | <a href="#">300</a>  | bi  | 1 | <a href="#">246</a>  | bi  | 1 | <a href="#">247</a>  |
| 1 | <a href="#">339</a>  | 349  | bi  | 1 | <a href="#">668</a>  | bi  | 1 | <a href="#">301</a>  | bi  | 1 | <a href="#">247</a>  | bi  | 1 | <a href="#">248</a>  |
| 1 | <a href="#">340</a>  | 195  | bi  | 1 | <a href="#">669</a>  | bi  | 1 | <a href="#">302</a>  | bi  | 1 | <a href="#">248</a>  | bi  | 1 | <a href="#">249</a>  |
| 1 | <a href="#">341</a>  | 393  | uni | 1 | <a href="#">1025</a> | -   |   |                      | -   |   |                      | uni | 1 | <a href="#">424</a>  |
| 1 | <a href="#">342</a>  | 245  | bi  | 1 | <a href="#">670</a>  | bi  | 1 | <a href="#">303</a>  | bi  | 1 | <a href="#">249</a>  | bi  | 1 | <a href="#">250</a>  |
| 1 | <a href="#">343</a>  | 278  | bi  | 1 | <a href="#">671</a>  | bi  | 1 | <a href="#">304</a>  | bi  | 1 | <a href="#">250</a>  | bi  | 1 | <a href="#">251</a>  |
| 1 | <a href="#">344</a>  | 179  | bi  | 1 | <a href="#">672</a>  | bi  | 1 | <a href="#">305</a>  | bi  | 1 | <a href="#">251</a>  | bi  | 1 | <a href="#">252</a>  |
| 1 | <a href="#">345</a>  | 451  | bi  | 1 | <a href="#">673</a>  | bi  | 1 | <a href="#">306</a>  | bi  | 1 | <a href="#">252</a>  | bi  | 1 | <a href="#">253</a>  |
| 1 | <a href="#">346</a>  | 229  | bi  | 1 | <a href="#">674</a>  | bi  | 1 | <a href="#">307</a>  | bi  | 1 | <a href="#">253</a>  | bi  | 1 | <a href="#">254</a>  |
| 1 | <a href="#">347</a>  | 579  | bi  | 1 | <a href="#">675</a>  | bi  | 1 | <a href="#">308</a>  | bi  | 1 | <a href="#">254</a>  | bi  | 1 | <a href="#">255</a>  |
| 1 | <a href="#">348</a>  | 382  | bi  | 1 | <a href="#">676</a>  | bi  | 1 | <a href="#">309</a>  | bi  | 1 | <a href="#">255</a>  | bi  | 1 | <a href="#">256</a>  |
| 1 | <a href="#">349</a>  | 231  | bi  | 1 | <a href="#">677</a>  | bi  | 1 | <a href="#">310</a>  | bi  | 1 | <a href="#">256</a>  | bi  | 1 | <a href="#">257</a>  |
| 1 | <a href="#">350</a>  | 494  | bi  | 1 | <a href="#">678</a>  | bi  | 1 | <a href="#">311</a>  | bi  | 1 | <a href="#">257</a>  | bi  | 1 | <a href="#">258</a>  |
| 1 | <a href="#">351</a>  | 326  | bi  | 1 | <a href="#">679</a>  | bi  | 1 | <a href="#">312</a>  | bi  | 1 | <a href="#">258</a>  | bi  | 1 | <a href="#">259</a>  |
| 1 | <a href="#">352</a>  | 322  | bi  | 1 | <a href="#">680</a>  | bi  | 1 | <a href="#">313</a>  | bi  | 1 | <a href="#">259</a>  | bi  | 1 | <a href="#">260</a>  |
| 1 | <a href="#">353</a>  | 348  | bi  | 1 | <a href="#">681</a>  | bi  | 1 | <a href="#">314</a>  | bi  | 1 | <a href="#">260</a>  | bi  | 1 | <a href="#">261</a>  |
| 1 | <a href="#">354</a>  | 202  | bi  | 1 | <a href="#">683</a>  | bi  | 1 | <a href="#">316</a>  | bi  | 1 | <a href="#">261</a>  | bi  | 1 | <a href="#">262</a>  |
| 1 | <a href="#">3270</a> | 404  | bi  | 1 | <a href="#">684</a>  | bi  | 1 | <a href="#">317</a>  | bi  | 1 | <a href="#">262</a>  | bi  | 1 | <a href="#">263</a>  |
| 1 | <a href="#">355</a>  | 140  | bi  | 1 | <a href="#">685</a>  | bi  | 1 | <a href="#">318</a>  | bi  | 1 | <a href="#">263</a>  | -   |   |                      |
| 1 | <a href="#">356</a>  | 80   | bi  | 1 | <a href="#">686</a>  | bi  | 1 | <a href="#">319</a>  | bi  | 1 | <a href="#">264</a>  | -   |   |                      |
| 1 | <a href="#">357</a>  | 273  | bi  | 1 | <a href="#">687</a>  | bi  | 1 | <a href="#">320</a>  | bi  | 1 | <a href="#">265</a>  | bi  | 1 | <a href="#">264</a>  |
| 1 | <a href="#">358</a>  | 531  | bi  | 1 | <a href="#">688</a>  | bi  | 1 | <a href="#">321</a>  | bi  | 1 | <a href="#">266</a>  | bi  | 1 | <a href="#">265</a>  |
| 1 | <a href="#">359</a>  | 1004 | bi  | 1 | <a href="#">689</a>  | bi  | 1 | <a href="#">322</a>  | bi  | 1 | <a href="#">267</a>  | bi  | 1 | <a href="#">266</a>  |
| 1 | <a href="#">360</a>  | 278  | bi  | 1 | <a href="#">690</a>  | bi  | 1 | <a href="#">323</a>  | bi  | 1 | <a href="#">268</a>  | bi  | 1 | <a href="#">267</a>  |
| 1 | <a href="#">361</a>  | 418  | bi  | 1 | <a href="#">691</a>  | bi  | 1 | <a href="#">324</a>  | bi  | 1 | <a href="#">269</a>  | bi  | 1 | <a href="#">268</a>  |
| 1 | <a href="#">362</a>  | 313  | bi  | 1 | <a href="#">692</a>  | bi  | 1 | <a href="#">325</a>  | bi  | 1 | <a href="#">270</a>  | bi  | 1 | <a href="#">269</a>  |
| 1 | <a href="#">363</a>  | 407  | bi  | 1 | <a href="#">693</a>  | bi  | 1 | <a href="#">326</a>  | bi  | 1 | <a href="#">271</a>  | bi  | 1 | <a href="#">270</a>  |
| 1 | <a href="#">364</a>  | 354  | bi  | 1 | <a href="#">694</a>  | bi  | 1 | <a href="#">327</a>  | bi  | 1 | <a href="#">272</a>  | bi  | 1 | <a href="#">271</a>  |
| 1 | <a href="#">365</a>  | 452  | bi  | 1 | <a href="#">695</a>  | bi  | 1 | <a href="#">328</a>  | bi  | 1 | <a href="#">273</a>  | bi  | 1 | <a href="#">272</a>  |
| 1 | <a href="#">366</a>  | 411  | bi  | 1 | <a href="#">696</a>  | bi  | 1 | <a href="#">329</a>  | bi  | 1 | <a href="#">274</a>  | bi  | 1 | <a href="#">273</a>  |
| 1 | <a href="#">367</a>  | 765  | bi  | 1 | <a href="#">697</a>  | bi  | 1 | <a href="#">330</a>  | bi  | 1 | <a href="#">275</a>  | bi  | 1 | <a href="#">274</a>  |
| 1 | <a href="#">368</a>  | 55   | -   |   |                      | -   |   |                      | -   |   |                      | -   |   |                      |
| 1 | <a href="#">369</a>  | 450  | bi  | 1 | <a href="#">699</a>  | bi  | 1 | <a href="#">331</a>  | bi  | 1 | <a href="#">276</a>  | bi  | 1 | <a href="#">275</a>  |
| 1 | <a href="#">370</a>  | 376  | bi  | 1 | <a href="#">701</a>  | bi  | 1 | <a href="#">332</a>  | bi  | 1 | <a href="#">277</a>  | bi  | 1 | <a href="#">276</a>  |
| 1 | <a href="#">371</a>  | 395  | bi  | 1 | <a href="#">702</a>  | bi  | 1 | <a href="#">333</a>  | bi  | 1 | <a href="#">278</a>  | bi  | 1 | <a href="#">277</a>  |
| 1 | <a href="#">372</a>  | 172  | bi  | 1 | <a href="#">703</a>  | bi  | 1 | <a href="#">334</a>  | bi  | 1 | <a href="#">279</a>  | bi  | 1 | <a href="#">278</a>  |
| 1 | <a href="#">373</a>  | 34   | -   |   |                      | -   |   |                      | -   |   |                      | -   |   |                      |
| 1 | <a href="#">374</a>  | 229  | bi  | 1 | <a href="#">705</a>  | bi  | 1 | <a href="#">336</a>  | bi  | 1 | <a href="#">280</a>  | bi  | 1 | <a href="#">280</a>  |
| 1 | <a href="#">375</a>  | 315  | bi  | 1 | <a href="#">706</a>  | bi  | 1 | <a href="#">337</a>  | bi  | 1 | <a href="#">281</a>  | bi  | 1 | <a href="#">281</a>  |
| 1 | <a href="#">376</a>  | 214  | bi  | 1 | <a href="#">707</a>  | bi  | 1 | <a href="#">338</a>  | bi  | 1 | <a href="#">282</a>  | bi  | 1 | <a href="#">282</a>  |
| 1 | <a href="#">377</a>  | 468  | bi  | 1 | <a href="#">708</a>  | bi  | 1 | <a href="#">339</a>  | bi  | 1 | <a href="#">283</a>  | bi  | 1 | <a href="#">283</a>  |
| 1 | <a href="#">378</a>  | 145  | bi  | 1 | <a href="#">709</a>  | bi  | 1 | <a href="#">340</a>  | bi  | 1 | <a href="#">284</a>  | bi  | 1 | <a href="#">284</a>  |
| 1 | <a href="#">379</a>  | 212  | bi  | 1 | <a href="#">710</a>  | bi  | 1 | <a href="#">341</a>  | bi  | 1 | <a href="#">285</a>  | bi  | 1 | <a href="#">285</a>  |

|   |                      |     |     |   |                      |    |   |                     |    |   |                     |    |   |                     |
|---|----------------------|-----|-----|---|----------------------|----|---|---------------------|----|---|---------------------|----|---|---------------------|
| 1 | <a href="#">380</a>  | 278 | bi  | 1 | <a href="#">711</a>  | bi | 1 | <a href="#">342</a> | bi | 1 | <a href="#">286</a> | bi | 1 | <a href="#">286</a> |
| 1 | <a href="#">381</a>  | 576 | bi  | 1 | <a href="#">712</a>  | bi | 1 | <a href="#">343</a> | bi | 1 | <a href="#">287</a> | bi | 1 | <a href="#">287</a> |
| 1 | <a href="#">382</a>  | 678 | bi  | 1 | <a href="#">713</a>  | bi | 1 | <a href="#">344</a> | bi | 1 | <a href="#">288</a> | bi | 1 | <a href="#">288</a> |
| 1 | <a href="#">383</a>  | 145 | bi  | 1 | <a href="#">714</a>  | bi | 1 | <a href="#">345</a> | bi | 1 | <a href="#">289</a> | bi | 1 | <a href="#">289</a> |
| 1 | <a href="#">384</a>  | 52  | bi  | 1 | <a href="#">715</a>  | -  |   |                     | bi | 1 | <a href="#">290</a> | bi | 1 | <a href="#">290</a> |
| 1 | <a href="#">385</a>  | 591 | bi  | 1 | <a href="#">717</a>  | bi | 1 | <a href="#">346</a> | bi | 1 | <a href="#">291</a> | bi | 1 | <a href="#">291</a> |
| 1 | <a href="#">386</a>  | 146 | bi  | 1 | <a href="#">718</a>  | bi | 1 | <a href="#">347</a> | bi | 1 | <a href="#">292</a> | bi | 1 | <a href="#">292</a> |
| 1 | <a href="#">387</a>  | 385 | bi  | 1 | <a href="#">719</a>  | bi | 1 | <a href="#">348</a> | bi | 1 | <a href="#">293</a> | bi | 1 | <a href="#">293</a> |
| 1 | <a href="#">388</a>  | 372 | bi  | 1 | <a href="#">720</a>  | bi | 1 | <a href="#">349</a> | bi | 1 | <a href="#">294</a> | bi | 1 | <a href="#">294</a> |
| 1 | <a href="#">389</a>  | 213 | bi  | 1 | <a href="#">721</a>  | bi | 1 | <a href="#">350</a> | bi | 1 | <a href="#">295</a> | bi | 1 | <a href="#">295</a> |
| 1 | <a href="#">390</a>  | 393 | bi  | 1 | <a href="#">722</a>  | bi | 1 | <a href="#">351</a> | bi | 1 | <a href="#">296</a> | bi | 1 | <a href="#">297</a> |
| 1 | <a href="#">3271</a> | 237 | bi  | 1 | <a href="#">723</a>  | bi | 1 | <a href="#">352</a> | bi | 1 | <a href="#">297</a> | bi | 1 | <a href="#">298</a> |
| 1 | <a href="#">3272</a> | 410 | bi  | 1 | <a href="#">724</a>  | bi | 1 | <a href="#">353</a> | bi | 1 | <a href="#">298</a> | bi | 1 | <a href="#">299</a> |
| 1 | <a href="#">391</a>  | 235 | bi  | 1 | <a href="#">725</a>  | bi | 1 | <a href="#">355</a> | bi | 1 | <a href="#">300</a> | bi | 1 | <a href="#">300</a> |
| 1 | <a href="#">392</a>  | 506 | bi  | 1 | <a href="#">727</a>  | bi | 1 | <a href="#">356</a> | bi | 1 | <a href="#">301</a> | bi | 1 | <a href="#">301</a> |
| 1 | <a href="#">393</a>  | 152 | bi  | 1 | <a href="#">728</a>  | bi | 1 | <a href="#">357</a> | bi | 1 | <a href="#">302</a> | bi | 1 | <a href="#">302</a> |
| 1 | <a href="#">394</a>  | 251 | bi  | 1 | <a href="#">729</a>  | bi | 1 | <a href="#">358</a> | bi | 1 | <a href="#">303</a> | bi | 1 | <a href="#">303</a> |
| 1 | <a href="#">395</a>  | 216 | bi  | 1 | <a href="#">730</a>  | bi | 1 | <a href="#">359</a> | bi | 1 | <a href="#">304</a> | bi | 1 | <a href="#">304</a> |
| 1 | <a href="#">396</a>  | 336 | bi  | 1 | <a href="#">731</a>  | bi | 1 | <a href="#">360</a> | bi | 1 | <a href="#">305</a> | bi | 1 | <a href="#">305</a> |
| 1 | <a href="#">397</a>  | 277 | bi  | 1 | <a href="#">732</a>  | bi | 1 | <a href="#">361</a> | bi | 1 | <a href="#">306</a> | bi | 1 | <a href="#">306</a> |
| 1 | <a href="#">398</a>  | 263 | bi  | 1 | <a href="#">733</a>  | bi | 1 | <a href="#">362</a> | bi | 1 | <a href="#">307</a> | bi | 1 | <a href="#">307</a> |
| 1 | <a href="#">399</a>  | 371 | -   |   |                      | bi | 1 | <a href="#">363</a> | bi | 1 | <a href="#">308</a> | bi | 1 | <a href="#">308</a> |
| 1 | <a href="#">400</a>  | 336 | -   |   |                      | bi | 1 | <a href="#">364</a> | bi | 1 | <a href="#">309</a> | bi | 1 | <a href="#">309</a> |
| 1 | <a href="#">401</a>  | 159 | -   |   |                      | bi | 1 | <a href="#">365</a> | bi | 1 | <a href="#">310</a> | bi | 1 | <a href="#">310</a> |
| 1 | <a href="#">402</a>  | 432 | -   |   |                      | bi | 1 | <a href="#">366</a> | bi | 1 | <a href="#">311</a> | bi | 1 | <a href="#">311</a> |
| 1 | <a href="#">403</a>  | 291 | uni | 1 | <a href="#">1913</a> | bi | 1 | <a href="#">367</a> | bi | 1 | <a href="#">312</a> | bi | 1 | <a href="#">312</a> |
| 1 | <a href="#">404</a>  | 495 | uni | 1 | <a href="#">898</a>  | bi | 1 | <a href="#">368</a> | bi | 1 | <a href="#">313</a> | bi | 1 | <a href="#">313</a> |
| 1 | <a href="#">405</a>  | 429 | -   |   |                      | bi | 1 | <a href="#">369</a> | bi | 1 | <a href="#">314</a> | bi | 1 | <a href="#">314</a> |
| 1 | <a href="#">406</a>  | 280 | -   |   |                      | bi | 1 | <a href="#">370</a> | bi | 1 | <a href="#">315</a> | bi | 1 | <a href="#">315</a> |
| 1 | <a href="#">407</a>  | 104 | -   |   |                      | bi | 1 | <a href="#">371</a> | bi | 1 | <a href="#">316</a> | bi | 1 | <a href="#">316</a> |
| 1 | <a href="#">408</a>  | 307 | uni | 1 | <a href="#">868</a>  | bi | 1 | <a href="#">372</a> | bi | 1 | <a href="#">317</a> | bi | 1 | <a href="#">317</a> |
| 1 | <a href="#">409</a>  | 282 | -   |   |                      | bi | 1 | <a href="#">373</a> | bi | 1 | <a href="#">318</a> | bi | 1 | <a href="#">319</a> |
| 1 | <a href="#">410</a>  | 67  | bi  | 1 | <a href="#">734</a>  | bi | 1 | <a href="#">374</a> | bi | 1 | <a href="#">319</a> | bi | 1 | <a href="#">320</a> |
| 1 | <a href="#">411</a>  | 494 | bi  | 1 | <a href="#">735</a>  | bi | 1 | <a href="#">375</a> | bi | 1 | <a href="#">320</a> | bi | 1 | <a href="#">321</a> |
| 1 | <a href="#">412</a>  | 37  | -   |   |                      | -  |   |                     | -  |   |                     | -  |   |                     |
| 1 | <a href="#">413</a>  | 74  | -   |   |                      | bi | 1 | <a href="#">376</a> | -  |   |                     | bi | 1 | <a href="#">322</a> |
| 1 | <a href="#">414</a>  | 200 | bi  | 1 | <a href="#">736</a>  | bi | 1 | <a href="#">377</a> | bi | 1 | <a href="#">321</a> | bi | 1 | <a href="#">323</a> |
| 1 | <a href="#">3273</a> | 97  | bi  | 1 | <a href="#">737</a>  | bi | 1 | <a href="#">378</a> | bi | 1 | <a href="#">322</a> | bi | 1 | <a href="#">324</a> |
| 1 | <a href="#">415</a>  | 272 | bi  | 1 | <a href="#">738</a>  | bi | 1 | <a href="#">379</a> | bi | 1 | <a href="#">323</a> | bi | 1 | <a href="#">325</a> |
| 1 | <a href="#">416</a>  | 486 | bi  | 1 | <a href="#">739</a>  | bi | 1 | <a href="#">380</a> | bi | 1 | <a href="#">324</a> | bi | 1 | <a href="#">326</a> |
| 1 | <a href="#">417</a>  | 456 | bi  | 1 | <a href="#">740</a>  | bi | 1 | <a href="#">381</a> | bi | 1 | <a href="#">325</a> | bi | 1 | <a href="#">327</a> |
| 1 | <a href="#">418</a>  | 578 | bi  | 1 | <a href="#">741</a>  | bi | 1 | <a href="#">382</a> | bi | 1 | <a href="#">326</a> | bi | 1 | <a href="#">328</a> |
| 1 | <a href="#">419</a>  | 268 | bi  | 1 | <a href="#">742</a>  | bi | 1 | <a href="#">383</a> | bi | 1 | <a href="#">327</a> | bi | 1 | <a href="#">329</a> |
| 1 | <a href="#">420</a>  | 368 | bi  | 1 | <a href="#">743</a>  | bi | 1 | <a href="#">384</a> | bi | 1 | <a href="#">328</a> | bi | 1 | <a href="#">330</a> |
| 1 | <a href="#">421</a>  | 233 | bi  | 1 | <a href="#">744</a>  | bi | 1 | <a href="#">385</a> | bi | 1 | <a href="#">329</a> | bi | 1 | <a href="#">331</a> |
| 1 | <a href="#">422</a>  | 509 | bi  | 1 | <a href="#">745</a>  | bi | 1 | <a href="#">386</a> | bi | 1 | <a href="#">330</a> | bi | 1 | <a href="#">332</a> |
| 1 | <a href="#">423</a>  | 134 | bi  | 1 | <a href="#">746</a>  | bi | 1 | <a href="#">387</a> | bi | 1 | <a href="#">331</a> | bi | 1 | <a href="#">333</a> |
| 1 | <a href="#">424</a>  | 260 | bi  | 1 | <a href="#">747</a>  | bi | 1 | <a href="#">388</a> | bi | 1 | <a href="#">332</a> | bi | 1 | <a href="#">334</a> |
| 1 | <a href="#">425</a>  | 268 | bi  | 1 | <a href="#">749</a>  | bi | 1 | <a href="#">389</a> | bi | 1 | <a href="#">333</a> | bi | 1 | <a href="#">335</a> |
| 1 | <a href="#">426</a>  | 273 | bi  | 1 | <a href="#">750</a>  | bi | 1 | <a href="#">390</a> | bi | 1 | <a href="#">334</a> | bi | 1 | <a href="#">336</a> |
| 1 | <a href="#">427</a>  | 159 | bi  | 1 | <a href="#">752</a>  | bi | 1 | <a href="#">391</a> | bi | 1 | <a href="#">335</a> | bi | 1 | <a href="#">337</a> |
| 1 | <a href="#">428</a>  | 284 | bi  | 1 | <a href="#">753</a>  | bi | 1 | <a href="#">392</a> | bi | 1 | <a href="#">336</a> | bi | 1 | <a href="#">338</a> |
| 1 | <a href="#">429</a>  | 301 | bi  | 1 | <a href="#">754</a>  | bi | 1 | <a href="#">393</a> | bi | 1 | <a href="#">337</a> | bi | 1 | <a href="#">339</a> |
| 1 | <a href="#">430</a>  | 330 | bi  | 1 | <a href="#">756</a>  | bi | 1 | <a href="#">394</a> | bi | 1 | <a href="#">338</a> | bi | 1 | <a href="#">340</a> |
| 1 | <a href="#">431</a>  | 140 | bi  | 1 | <a href="#">757</a>  | bi | 1 | <a href="#">395</a> | bi | 1 | <a href="#">339</a> | bi | 1 | <a href="#">341</a> |
| 1 | <a href="#">432</a>  | 270 | bi  | 1 | <a href="#">758</a>  | bi | 1 | <a href="#">396</a> | bi | 1 | <a href="#">340</a> | bi | 1 | <a href="#">342</a> |
| 1 | <a href="#">433</a>  | 203 | bi  | 1 | <a href="#">759</a>  | bi | 1 | <a href="#">397</a> | bi | 1 | <a href="#">341</a> | bi | 1 | <a href="#">343</a> |

|   |                      |      |     |   |                      |     |   |                      |     |   |                      |     |   |                      |
|---|----------------------|------|-----|---|----------------------|-----|---|----------------------|-----|---|----------------------|-----|---|----------------------|
| 1 | <a href="#">434</a>  | 327  | bi  | 1 | <a href="#">760</a>  | bi  | 1 | <a href="#">398</a>  | bi  | 1 | <a href="#">342</a>  | bi  | 1 | <a href="#">344</a>  |
| 1 | <a href="#">435</a>  | 403  | bi  | 1 | <a href="#">761</a>  | bi  | 1 | <a href="#">399</a>  | bi  | 1 | <a href="#">343</a>  | bi  | 1 | <a href="#">345</a>  |
| 1 | <a href="#">436</a>  | 234  | bi  | 1 | <a href="#">762</a>  | bi  | 1 | <a href="#">400</a>  | bi  | 1 | <a href="#">344</a>  | bi  | 1 | <a href="#">346</a>  |
| 1 | <a href="#">437</a>  | 234  | bi  | 1 | <a href="#">763</a>  | bi  | 1 | <a href="#">401</a>  | bi  | 1 | <a href="#">345</a>  | bi  | 1 | <a href="#">347</a>  |
| 1 | <a href="#">438</a>  | 190  | bi  | 1 | <a href="#">764</a>  | bi  | 1 | <a href="#">402</a>  | bi  | 1 | <a href="#">346</a>  | bi  | 1 | <a href="#">348</a>  |
| 1 | <a href="#">439</a>  | 429  | bi  | 1 | <a href="#">765</a>  | bi  | 1 | <a href="#">403</a>  | bi  | 1 | <a href="#">347</a>  | bi  | 1 | <a href="#">349</a>  |
| 1 | <a href="#">440</a>  | 322  | bi  | 1 | <a href="#">766</a>  | bi  | 1 | <a href="#">404</a>  | bi  | 1 | <a href="#">348</a>  | bi  | 1 | <a href="#">350</a>  |
| 1 | <a href="#">441</a>  | 720  | bi  | 1 | <a href="#">767</a>  | bi  | 1 | <a href="#">405</a>  | bi  | 1 | <a href="#">349</a>  | bi  | 1 | <a href="#">351</a>  |
| 1 | <a href="#">442</a>  | 126  | bi  | 1 | <a href="#">768</a>  | bi  | 1 | <a href="#">406</a>  | bi  | 1 | <a href="#">350</a>  | bi  | 1 | <a href="#">352</a>  |
| 1 | <a href="#">443</a>  | 75   | bi  | 1 | <a href="#">769</a>  | bi  | 1 | <a href="#">407</a>  | bi  | 1 | <a href="#">351</a>  | bi  | 1 | <a href="#">353</a>  |
| 1 | <a href="#">444</a>  | 158  | bi  | 1 | <a href="#">770</a>  | bi  | 1 | <a href="#">409</a>  | bi  | 1 | <a href="#">352</a>  | bi  | 1 | <a href="#">355</a>  |
| 1 | <a href="#">445</a>  | 717  | bi  | 1 | <a href="#">771</a>  | bi  | 1 | <a href="#">410</a>  | bi  | 1 | <a href="#">353</a>  | bi  | 1 | <a href="#">356</a>  |
| 1 | <a href="#">446</a>  | 46   | bi  | 1 | <a href="#">772</a>  | bi  | 1 | <a href="#">411</a>  | bi  | 1 | <a href="#">354</a>  | bi  | 1 | <a href="#">357</a>  |
| 1 | <a href="#">447</a>  | 32   | -   |   |                      | -   |   |                      | -   |   |                      | -   |   |                      |
| 1 | <a href="#">448</a>  | 390  | bi  | 1 | <a href="#">773</a>  | bi  | 1 | <a href="#">412</a>  | uni | 1 | <a href="#">1321</a> | bi  | 1 | <a href="#">358</a>  |
| 1 | <a href="#">449</a>  | 77   | bi  | 1 | <a href="#">774</a>  | bi  | 1 | <a href="#">413</a>  | -   |   |                      | bi  | 1 | <a href="#">359</a>  |
| 1 | <a href="#">450</a>  | 82   | uni | 1 | <a href="#">528</a>  | bi  | 1 | <a href="#">414</a>  | uni | 1 | <a href="#">794</a>  | -   |   |                      |
| 1 | <a href="#">451</a>  | 134  | bi  | 1 | <a href="#">775</a>  | bi  | 1 | <a href="#">415</a>  | uni | 1 | <a href="#">793</a>  | bi  | 1 | <a href="#">360</a>  |
| 1 | <a href="#">452</a>  | 1306 | uni | 3 | <a href="#">2942</a> | -   |   |                      | -   |   |                      | uni | 1 | <a href="#">397</a>  |
| 1 | <a href="#">453</a>  | 119  | uni | 4 | <a href="#">3042</a> | -   |   |                      | -   |   |                      | uni | 1 | <a href="#">396</a>  |
| 1 | <a href="#">454</a>  | 129  | uni | 4 | <a href="#">3041</a> | -   |   |                      | -   |   |                      | -   |   |                      |
| 1 | <a href="#">455</a>  | 87   | uni | 4 | <a href="#">3040</a> | -   |   |                      | -   |   |                      | -   |   |                      |
| 1 | <a href="#">456</a>  | 293  | uni | 4 | <a href="#">3039</a> | -   |   |                      | -   |   |                      | uni | 1 | <a href="#">394</a>  |
| 1 | <a href="#">457</a>  | 272  | uni | 4 | <a href="#">3038</a> | -   |   |                      | -   |   |                      | uni | 1 | <a href="#">395</a>  |
| 1 | <a href="#">458</a>  | 424  | uni | 4 | <a href="#">3037</a> | uni | 1 | <a href="#">1563</a> | uni | 1 | <a href="#">1486</a> | uni | 1 | <a href="#">193</a>  |
| 1 | <a href="#">459</a>  | 206  | uni | 4 | <a href="#">3036</a> | -   |   |                      | -   |   |                      | -   |   |                      |
| 1 | <a href="#">460</a>  | 123  | uni | 4 | <a href="#">3035</a> | -   |   |                      | -   |   |                      | -   |   |                      |
| 1 | <a href="#">461</a>  | 105  | uni | 4 | <a href="#">3034</a> | -   |   |                      | -   |   |                      | -   |   |                      |
| 1 | <a href="#">462</a>  | 325  | uni | 4 | <a href="#">3033</a> | -   |   |                      | -   |   |                      | -   |   |                      |
| 1 | <a href="#">463</a>  | 87   | uni | 4 | <a href="#">3032</a> | -   |   |                      | -   |   |                      | -   |   |                      |
| 1 | <a href="#">464</a>  | 131  | uni | 4 | <a href="#">3031</a> | -   |   |                      | -   |   |                      | -   |   |                      |
| 1 | <a href="#">465</a>  | 161  | -   |   |                      | -   |   |                      | -   |   |                      | -   |   |                      |
| 1 | <a href="#">466</a>  | 153  | uni | 4 | <a href="#">3030</a> | uni | 1 | <a href="#">1948</a> | uni | 1 | <a href="#">8</a>    | uni | 1 | <a href="#">8</a>    |
| 1 | <a href="#">467</a>  | 831  | bi  | 4 | <a href="#">3028</a> | -   |   |                      | uni | 1 | <a href="#">780</a>  | -   |   |                      |
| 1 | <a href="#">468</a>  | 115  | uni | 4 | <a href="#">3027</a> | -   |   |                      | -   |   |                      | -   |   |                      |
| 1 | <a href="#">469</a>  | 782  | bi  | 4 | <a href="#">3025</a> | -   |   |                      | -   |   |                      | -   |   |                      |
| 1 | <a href="#">470</a>  | 753  | bi  | 4 | <a href="#">3024</a> | -   |   |                      | -   |   |                      | -   |   |                      |
| 1 | <a href="#">471</a>  | 57   | bi  | 4 | <a href="#">3023</a> | -   |   |                      | -   |   |                      | -   |   |                      |
| 1 | <a href="#">472</a>  | 243  | bi  | 4 | <a href="#">3022</a> | -   |   |                      | -   |   |                      | -   |   |                      |
| 1 | <a href="#">473</a>  | 163  | bi  | 4 | <a href="#">3021</a> | -   |   |                      | -   |   |                      | -   |   |                      |
| 1 | <a href="#">474</a>  | 89   | bi  | 4 | <a href="#">3020</a> | bi  | 3 | <a href="#">2996</a> | -   |   |                      | -   |   |                      |
| 1 | <a href="#">475</a>  | 167  | bi  | 4 | <a href="#">3019</a> | -   |   |                      | -   |   |                      | -   |   |                      |
| 1 | <a href="#">476</a>  | 83   | bi  | 4 | <a href="#">3018</a> | -   |   |                      | -   |   |                      | bi  | 1 | <a href="#">1842</a> |
| 1 | <a href="#">477</a>  | 139  | bi  | 4 | <a href="#">3017</a> | uni | 1 | <a href="#">8</a>    | uni | 1 | <a href="#">8</a>    | uni | 1 | <a href="#">8</a>    |
| 1 | <a href="#">478</a>  | 195  | bi  | 4 | <a href="#">3016</a> | bi  | 1 | <a href="#">1946</a> | -   |   |                      | -   |   |                      |
| 1 | <a href="#">479</a>  | 89   | bi  | 4 | <a href="#">3015</a> | -   |   |                      | -   |   |                      | -   |   |                      |
| 1 | <a href="#">480</a>  | 92   | bi  | 4 | <a href="#">3014</a> | -   |   |                      | -   |   |                      | -   |   |                      |
| 1 | <a href="#">3274</a> | 215  | uni | 1 | <a href="#">2520</a> | bi  | 2 | <a href="#">2938</a> | -   |   |                      | uni | 1 | <a href="#">372</a>  |
| 1 | <a href="#">3275</a> | 232  | uni | 1 | <a href="#">1025</a> | -   |   |                      | -   |   |                      | uni | 1 | <a href="#">424</a>  |
| 1 | <a href="#">481</a>  | 346  | bi  | 1 | <a href="#">783</a>  | uni | 1 | <a href="#">1405</a> | uni | 1 | <a href="#">1330</a> | bi  | 1 | <a href="#">400</a>  |
| 1 | <a href="#">482</a>  | 313  | bi  | 1 | <a href="#">784</a>  | uni | 1 | <a href="#">1403</a> | uni | 1 | <a href="#">1328</a> | bi  | 1 | <a href="#">401</a>  |
| 1 | <a href="#">483</a>  | 110  | uni | 4 | <a href="#">3038</a> | -   |   |                      | -   |   |                      | uni | 1 | <a href="#">395</a>  |
| 1 | <a href="#">484</a>  | 62   | -   |   |                      | -   |   |                      | -   |   |                      | -   |   |                      |
| 1 | <a href="#">3276</a> | 236  | uni | 1 | <a href="#">798</a>  | uni | 2 | <a href="#">2938</a> | -   |   |                      | uni | 1 | <a href="#">410</a>  |
| 1 | <a href="#">485</a>  | 325  | bi  | 1 | <a href="#">848</a>  | bi  | 1 | <a href="#">444</a>  | uni | 1 | <a href="#">2232</a> | bi  | 1 | <a href="#">461</a>  |
| 1 | <a href="#">3277</a> | 215  | uni | 1 | <a href="#">2520</a> | uni | 2 | <a href="#">2938</a> | -   |   |                      | uni | 1 | <a href="#">372</a>  |
| 1 | <a href="#">486</a>  | 140  | uni | 3 | <a href="#">2976</a> | uni | 1 | <a href="#">1749</a> | uni | 1 | <a href="#">1638</a> | uni | 1 | <a href="#">1746</a> |

|   |                      |     |     |   |                      |     |   |                      |     |   |                      |     |   |                      |
|---|----------------------|-----|-----|---|----------------------|-----|---|----------------------|-----|---|----------------------|-----|---|----------------------|
| 1 | <a href="#">487</a>  | 67  | uni | 1 | <a href="#">1210</a> | uni | 1 | <a href="#">691</a>  | uni | 1 | <a href="#">581</a>  | uni | 1 | <a href="#">695</a>  |
| 1 | <a href="#">488</a>  | 69  | -   |   |                      | -   |   |                      | -   |   |                      | -   |   |                      |
| 1 | <a href="#">489</a>  | 64  | -   |   |                      | -   |   |                      | -   |   |                      | -   |   |                      |
| 1 | <a href="#">490</a>  | 994 | -   |   |                      | -   |   |                      | -   |   |                      | -   |   |                      |
| 1 | <a href="#">491</a>  | 391 | uni | 1 | <a href="#">2146</a> | -   |   |                      | -   |   |                      | uni | 1 | <a href="#">1007</a> |
| 1 | <a href="#">492</a>  | 306 | bi  | 1 | <a href="#">868</a>  | uni | 1 | <a href="#">372</a>  | uni | 1 | <a href="#">317</a>  | uni | 1 | <a href="#">317</a>  |
| 1 | <a href="#">493</a>  | 139 | bi  | 1 | <a href="#">869</a>  | -   |   |                      | -   |   |                      | -   |   |                      |
| 1 | <a href="#">494</a>  | 41  | bi  | 1 | <a href="#">870</a>  | -   |   |                      | -   |   |                      | -   |   |                      |
| 1 | <a href="#">495</a>  | 222 | bi  | 1 | <a href="#">871</a>  | -   |   |                      | -   |   |                      | -   |   |                      |
| 1 | <a href="#">496</a>  | 185 | uni | 1 | <a href="#">874</a>  | uni | 2 | <a href="#">2930</a> | -   |   |                      | uni | 1 | <a href="#">406</a>  |
| 1 | <a href="#">3278</a> | 218 | bi  | 1 | <a href="#">873</a>  | uni | 2 | <a href="#">2930</a> | -   |   |                      | uni | 1 | <a href="#">456</a>  |
| 1 | <a href="#">497</a>  | 273 | bi  | 1 | <a href="#">875</a>  | uni | 1 | <a href="#">235</a>  | uni | 1 | <a href="#">233</a>  | uni | 1 | <a href="#">234</a>  |
| 1 | <a href="#">498</a>  | 236 | bi  | 1 | <a href="#">876</a>  | uni | 1 | <a href="#">67</a>   | uni | 1 | <a href="#">61</a>   | uni | 1 | <a href="#">66</a>   |
| 1 | <a href="#">3279</a> | 501 | bi  | 1 | <a href="#">877</a>  | uni | 1 | <a href="#">28</a>   | uni | 1 | <a href="#">25</a>   | uni | 1 | <a href="#">25</a>   |
| 1 | <a href="#">3280</a> | 161 | bi  | 1 | <a href="#">878</a>  | uni | 1 | <a href="#">2076</a> | uni | 1 | <a href="#">1818</a> | uni | 1 | <a href="#">1963</a> |
| 1 | <a href="#">499</a>  | 255 | bi  | 1 | <a href="#">879</a>  | -   |   |                      | -   |   |                      | -   |   |                      |
| 1 | <a href="#">500</a>  | 348 | bi  | 1 | <a href="#">880</a>  | -   |   |                      | -   |   |                      | -   |   |                      |
| 1 | <a href="#">501</a>  | 58  | bi  | 1 | <a href="#">881</a>  | uni | 1 | <a href="#">869</a>  | uni | 1 | <a href="#">761</a>  | uni | 1 | <a href="#">876</a>  |
| 1 | <a href="#">502</a>  | 129 | bi  | 1 | <a href="#">882</a>  | -   |   |                      | -   |   |                      | -   |   |                      |
| 1 | <a href="#">503</a>  | 135 | bi  | 1 | <a href="#">883</a>  | uni | 1 | <a href="#">2842</a> | uni | 1 | <a href="#">2450</a> | uni | 1 | <a href="#">2667</a> |
| 1 | <a href="#">504</a>  | 357 | bi  | 1 | <a href="#">884</a>  | -   |   |                      | -   |   |                      | -   |   |                      |
| 1 | <a href="#">505</a>  | 378 | bi  | 1 | <a href="#">885</a>  | uni | 1 | <a href="#">2532</a> | uni | 1 | <a href="#">2147</a> | uni | 1 | <a href="#">2306</a> |
| 1 | <a href="#">506</a>  | 389 | bi  | 1 | <a href="#">891</a>  | uni | 1 | <a href="#">2424</a> | uni | 1 | <a href="#">2095</a> | uni | 1 | <a href="#">2251</a> |
| 1 | <a href="#">507</a>  | 689 | bi  | 1 | <a href="#">892</a>  | -   |   |                      | uni | 1 | <a href="#">1487</a> | -   |   |                      |
| 1 | <a href="#">508</a>  | 262 | bi  | 1 | <a href="#">893</a>  | uni | 1 | <a href="#">634</a>  | uni | 1 | <a href="#">533</a>  | uni | 1 | <a href="#">335</a>  |
| 1 | <a href="#">509</a>  | 271 | bi  | 1 | <a href="#">894</a>  | uni | 1 | <a href="#">635</a>  | uni | 1 | <a href="#">534</a>  | uni | 1 | <a href="#">1676</a> |
| 1 | <a href="#">510</a>  | 161 | bi  | 1 | <a href="#">895</a>  | uni | 1 | <a href="#">1546</a> | uni | 1 | <a href="#">1469</a> | uni | 1 | <a href="#">1612</a> |
| 1 | <a href="#">511</a>  | 136 | bi  | 1 | <a href="#">896</a>  | uni | 1 | <a href="#">395</a>  | uni | 1 | <a href="#">339</a>  | uni | 1 | <a href="#">341</a>  |
| 1 | <a href="#">512</a>  | 436 | bi  | 1 | <a href="#">897</a>  | -   |   |                      | -   |   |                      | -   |   |                      |
| 1 | <a href="#">513</a>  | 497 | bi  | 1 | <a href="#">898</a>  | uni | 1 | <a href="#">2823</a> | uni | 1 | <a href="#">2431</a> | uni | 1 | <a href="#">2648</a> |
| 1 | <a href="#">514</a>  | 528 | uni | 1 | <a href="#">1006</a> | uni | 1 | <a href="#">490</a>  | uni | 1 | <a href="#">392</a>  | uni | 1 | <a href="#">516</a>  |
| 1 | <a href="#">515</a>  | 97  | -   |   |                      | bi  | 1 | <a href="#">1572</a> | -   |   |                      | -   |   |                      |
| 1 | <a href="#">516</a>  | 98  | -   |   |                      | -   |   |                      | -   |   |                      | -   |   |                      |
| 1 | <a href="#">517</a>  | 51  | -   |   |                      | bi  | 1 | <a href="#">1571</a> | -   |   |                      | -   |   |                      |
| 1 | <a href="#">518</a>  | 82  | -   |   |                      | uni | 1 | <a href="#">1571</a> | -   |   |                      | -   |   |                      |
| 1 | <a href="#">519</a>  | 559 | -   |   |                      | -   |   |                      | -   |   |                      | -   |   |                      |
| 1 | <a href="#">520</a>  | 677 | uni | 1 | <a href="#">659</a>  | uni | 1 | <a href="#">240</a>  | uni | 1 | <a href="#">238</a>  | uni | 1 | <a href="#">239</a>  |
| 1 | <a href="#">521</a>  | 177 | -   |   |                      | -   |   |                      | -   |   |                      | -   |   |                      |
| 1 | <a href="#">522</a>  | 851 | uni | 1 | <a href="#">1584</a> | uni | 1 | <a href="#">1011</a> | uni | 1 | <a href="#">937</a>  | uni | 1 | <a href="#">1019</a> |
| 1 | <a href="#">523</a>  | 230 | uni | 1 | <a href="#">1583</a> | uni | 1 | <a href="#">1010</a> | uni | 1 | <a href="#">936</a>  | uni | 1 | <a href="#">1018</a> |
| 1 | <a href="#">3281</a> | 40  | -   |   |                      | -   |   |                      | -   |   |                      | -   |   |                      |
| 1 | <a href="#">524</a>  | 537 | -   |   |                      | -   |   |                      | -   |   |                      | -   |   |                      |
| 1 | <a href="#">525</a>  | 35  | -   |   |                      | -   |   |                      | -   |   |                      | -   |   |                      |
| 1 | <a href="#">526</a>  | 240 | bi  | 1 | <a href="#">930</a>  | uni | 1 | <a href="#">1740</a> | uni | 1 | <a href="#">1629</a> | uni | 1 | <a href="#">1736</a> |
| 1 | <a href="#">527</a>  | 281 | bi  | 1 | <a href="#">931</a>  | uni | 1 | <a href="#">1741</a> | uni | 1 | <a href="#">1630</a> | uni | 1 | <a href="#">1737</a> |
| 1 | <a href="#">528</a>  | 317 | bi  | 1 | <a href="#">932</a>  | uni | 1 | <a href="#">1742</a> | uni | 1 | <a href="#">1631</a> | uni | 1 | <a href="#">1738</a> |
| 1 | <a href="#">529</a>  | 78  | bi  | 1 | <a href="#">933</a>  | uni | 1 | <a href="#">827</a>  | uni | 1 | <a href="#">719</a>  | uni | 1 | <a href="#">832</a>  |
| 1 | <a href="#">530</a>  | 173 | bi  | 1 | <a href="#">934</a>  | -   |   |                      | -   |   |                      | -   |   |                      |
| 1 | <a href="#">531</a>  | 223 | bi  | 1 | <a href="#">935</a>  | -   |   |                      | -   |   |                      | -   |   |                      |
| 1 | <a href="#">532</a>  | 475 | bi  | 1 | <a href="#">936</a>  | uni | 1 | <a href="#">190</a>  | uni | 1 | <a href="#">187</a>  | uni | 1 | <a href="#">187</a>  |
| 1 | <a href="#">533</a>  | 190 | bi  | 1 | <a href="#">937</a>  | -   |   |                      | -   |   |                      | -   |   |                      |
| 1 | <a href="#">534</a>  | 585 | bi  | 1 | <a href="#">938</a>  | uni | 1 | <a href="#">1478</a> | uni | 1 | <a href="#">1717</a> | uni | 1 | <a href="#">1887</a> |
| 1 | <a href="#">535</a>  | 581 | bi  | 1 | <a href="#">939</a>  | uni | 1 | <a href="#">2256</a> | uni | 1 | <a href="#">1996</a> | uni | 1 | <a href="#">2150</a> |
| 1 | <a href="#">536</a>  | 90  | bi  | 1 | <a href="#">940</a>  | uni | 1 | <a href="#">2804</a> | uni | 1 | <a href="#">2410</a> | uni | 1 | <a href="#">2624</a> |
| 1 | <a href="#">537</a>  | 60  | bi  | 1 | <a href="#">941</a>  | uni | 1 | <a href="#">869</a>  | uni | 1 | <a href="#">761</a>  | uni | 1 | <a href="#">876</a>  |
| 1 | <a href="#">538</a>  | 126 | bi  | 1 | <a href="#">942</a>  | -   |   |                      | -   |   |                      | -   |   |                      |
| 1 | <a href="#">539</a>  | 50  | bi  | 1 | <a href="#">943</a>  | uni | 1 | <a href="#">2805</a> | uni | 1 | <a href="#">2411</a> | uni | 1 | <a href="#">2625</a> |



|   |                      |      |     |   |                      |     |   |                      |     |   |                      |     |   |                      |
|---|----------------------|------|-----|---|----------------------|-----|---|----------------------|-----|---|----------------------|-----|---|----------------------|
| 1 | <a href="#">540</a>  | 55   | bi  | 1 | <a href="#">944</a>  | uni | 1 | <a href="#">2806</a> | uni | 1 | <a href="#">2412</a> | uni | 1 | <a href="#">2626</a> |
| 1 | <a href="#">541</a>  | 517  | bi  | 1 | <a href="#">946</a>  | -   |   |                      | uni | 1 | <a href="#">1517</a> | -   |   |                      |
| 1 | <a href="#">3282</a> | 1570 | -   |   |                      | -   |   |                      | -   |   |                      | -   |   |                      |
| 1 | <a href="#">3283</a> | 552  | -   |   |                      | -   |   |                      | -   |   |                      | -   |   |                      |
| 1 | <a href="#">542</a>  | 125  | -   |   |                      | -   |   |                      | -   |   |                      | -   |   |                      |
| 1 | <a href="#">543</a>  | 393  | uni | 1 | <a href="#">1025</a> | -   |   |                      | -   |   |                      | uni | 1 | <a href="#">424</a>  |
| 1 | <a href="#">3284</a> | 35   | -   |   |                      | -   |   |                      | -   |   |                      | -   |   |                      |
| 1 | <a href="#">3285</a> | 140  | -   |   |                      | -   |   |                      | -   |   |                      | -   |   |                      |
| 1 | <a href="#">3286</a> | 177  | -   |   |                      | -   |   |                      | -   |   |                      | -   |   |                      |
| 1 | <a href="#">544</a>  | 77   | -   |   |                      | -   |   |                      | -   |   |                      | -   |   |                      |
| 1 | <a href="#">545</a>  | 208  | uni | 1 | <a href="#">1713</a> | uni | 1 | <a href="#">1140</a> | uni | 1 | <a href="#">1063</a> | uni | 1 | <a href="#">1144</a> |
| 1 | <a href="#">546</a>  | 215  | -   |   |                      | uni | 1 | <a href="#">609</a>  | uni | 1 | <a href="#">510</a>  | -   |   |                      |
| 1 | <a href="#">3287</a> | 141  | uni | 1 | <a href="#">2166</a> | uni | 1 | <a href="#">1929</a> | -   |   |                      | uni | 1 | <a href="#">362</a>  |
| 1 | <a href="#">3288</a> | 64   | uni | 1 | <a href="#">825</a>  | uni | 1 | <a href="#">1928</a> | -   |   |                      | uni | 1 | <a href="#">438</a>  |
| 1 | <a href="#">547</a>  | 162  | bi  | 1 | <a href="#">860</a>  | -   |   |                      | -   |   |                      | -   |   |                      |
| 1 | <a href="#">548</a>  | 193  | uni | 1 | <a href="#">454</a>  | uni | 1 | <a href="#">76</a>   | uni | 1 | <a href="#">69</a>   | uni | 1 | <a href="#">76</a>   |
| 1 | <a href="#">549</a>  | 187  | uni | 1 | <a href="#">863</a>  | uni | 1 | <a href="#">73</a>   | uni | 1 | <a href="#">66</a>   | uni | 1 | <a href="#">73</a>   |
| 1 | <a href="#">550</a>  | 156  | uni | 1 | <a href="#">290</a>  | uni | 1 | <a href="#">2821</a> | uni | 1 | <a href="#">2429</a> | uni | 1 | <a href="#">2646</a> |
| 1 | <a href="#">551</a>  | 178  | -   |   |                      | bi  | 1 | <a href="#">1847</a> | -   |   |                      | uni | 1 | <a href="#">1835</a> |
| 1 | <a href="#">552</a>  | 142  | -   |   |                      | bi  | 1 | <a href="#">1849</a> | -   |   |                      | -   |   |                      |
| 1 | <a href="#">553</a>  | 424  | -   |   |                      | bi  | 1 | <a href="#">1851</a> | -   |   |                      | -   |   |                      |
| 1 | <a href="#">554</a>  | 38   | -   |   |                      | -   |   |                      | -   |   |                      | -   |   |                      |
| 1 | <a href="#">555</a>  | 132  | -   |   |                      | -   |   |                      | -   |   |                      | -   |   |                      |
| 1 | <a href="#">556</a>  | 92   | bi  | 1 | <a href="#">951</a>  | -   |   |                      | -   |   |                      | -   |   |                      |
| 1 | <a href="#">557</a>  | 57   | bi  | 1 | <a href="#">952</a>  | -   |   |                      | -   |   |                      | -   |   |                      |
| 1 | <a href="#">558</a>  | 133  | bi  | 1 | <a href="#">499</a>  | -   |   |                      | -   |   |                      | bi  | 1 | <a href="#">2005</a> |
| 1 | <a href="#">559</a>  | 327  | bi  | 1 | <a href="#">954</a>  | uni | 1 | <a href="#">111</a>  | uni | 1 | <a href="#">109</a>  | uni | 1 | <a href="#">111</a>  |
| 1 | <a href="#">560</a>  | 293  | bi  | 1 | <a href="#">955</a>  | -   |   |                      | -   |   |                      | -   |   |                      |
| 1 | <a href="#">561</a>  | 267  | bi  | 1 | <a href="#">956</a>  | -   |   |                      | -   |   |                      | -   |   |                      |
| 1 | <a href="#">562</a>  | 32   | bi  | 1 | <a href="#">958</a>  | -   |   |                      | -   |   |                      | -   |   |                      |
| 1 | <a href="#">563</a>  | 57   | bi  | 1 | <a href="#">960</a>  | -   |   |                      | -   |   |                      | -   |   |                      |
| 1 | <a href="#">564</a>  | 55   | -   |   |                      | -   |   |                      | -   |   |                      | -   |   |                      |
| 1 | <a href="#">3289</a> | 135  | uni | 1 | <a href="#">961</a>  | uni | 1 | <a href="#">1544</a> | uni | 1 | <a href="#">1467</a> | uni | 1 | <a href="#">1610</a> |
| 1 | <a href="#">3290</a> | 107  | bi  | 1 | <a href="#">962</a>  | uni | 1 | <a href="#">1620</a> | uni | 1 | <a href="#">1567</a> | uni | 1 | <a href="#">1676</a> |
| 1 | <a href="#">565</a>  | 89   | bi  | 1 | <a href="#">963</a>  | -   |   |                      | -   |   |                      | -   |   |                      |
| 1 | <a href="#">566</a>  | 229  | bi  | 1 | <a href="#">964</a>  | -   |   |                      | -   |   |                      | -   |   |                      |
| 1 | <a href="#">567</a>  | 58   | -   |   |                      | -   |   |                      | -   |   |                      | -   |   |                      |
| 1 | <a href="#">568</a>  | 85   | -   |   |                      | -   |   |                      | -   |   |                      | -   |   |                      |
| 1 | <a href="#">569</a>  | 139  | bi  | 1 | <a href="#">965</a>  | bi  | 1 | <a href="#">451</a>  | uni | 1 | <a href="#">2265</a> | uni | 1 | <a href="#">2481</a> |
| 1 | <a href="#">570</a>  | 280  | bi  | 1 | <a href="#">966</a>  | bi  | 1 | <a href="#">452</a>  | bi  | 1 | <a href="#">355</a>  | bi  | 1 | <a href="#">478</a>  |
| 1 | <a href="#">571</a>  | 161  | bi  | 1 | <a href="#">967</a>  | bi  | 1 | <a href="#">453</a>  | bi  | 1 | <a href="#">356</a>  | bi  | 1 | <a href="#">479</a>  |
| 1 | <a href="#">572</a>  | 482  | bi  | 1 | <a href="#">968</a>  | bi  | 1 | <a href="#">454</a>  | bi  | 1 | <a href="#">357</a>  | bi  | 1 | <a href="#">480</a>  |
| 1 | <a href="#">573</a>  | 419  | bi  | 1 | <a href="#">969</a>  | bi  | 1 | <a href="#">455</a>  | bi  | 1 | <a href="#">358</a>  | bi  | 1 | <a href="#">481</a>  |
| 1 | <a href="#">574</a>  | 637  | bi  | 1 | <a href="#">970</a>  | bi  | 1 | <a href="#">456</a>  | bi  | 1 | <a href="#">359</a>  | bi  | 1 | <a href="#">482</a>  |
| 1 | <a href="#">575</a>  | 473  | bi  | 1 | <a href="#">971</a>  | bi  | 1 | <a href="#">457</a>  | bi  | 1 | <a href="#">360</a>  | bi  | 1 | <a href="#">483</a>  |
| 1 | <a href="#">576</a>  | 469  | bi  | 1 | <a href="#">972</a>  | bi  | 1 | <a href="#">458</a>  | bi  | 1 | <a href="#">361</a>  | bi  | 1 | <a href="#">484</a>  |
| 1 | <a href="#">577</a>  | 306  | bi  | 1 | <a href="#">974</a>  | bi  | 1 | <a href="#">459</a>  | bi  | 1 | <a href="#">362</a>  | bi  | 1 | <a href="#">485</a>  |
| 1 | <a href="#">578</a>  | 150  | bi  | 1 | <a href="#">975</a>  | bi  | 1 | <a href="#">460</a>  | bi  | 1 | <a href="#">363</a>  | bi  | 1 | <a href="#">486</a>  |
| 1 | <a href="#">579</a>  | 169  | bi  | 1 | <a href="#">976</a>  | bi  | 1 | <a href="#">461</a>  | bi  | 1 | <a href="#">364</a>  | bi  | 1 | <a href="#">487</a>  |
| 1 | <a href="#">580</a>  | 36   | -   |   |                      | -   |   |                      | -   |   |                      | -   |   |                      |
| 1 | <a href="#">581</a>  | 318  | bi  | 1 | <a href="#">977</a>  | bi  | 1 | <a href="#">462</a>  | bi  | 1 | <a href="#">365</a>  | bi  | 1 | <a href="#">488</a>  |
| 1 | <a href="#">582</a>  | 121  | bi  | 1 | <a href="#">978</a>  | bi  | 1 | <a href="#">463</a>  | bi  | 1 | <a href="#">366</a>  | bi  | 1 | <a href="#">489</a>  |
| 1 | <a href="#">583</a>  | 137  | bi  | 1 | <a href="#">979</a>  | bi  | 1 | <a href="#">464</a>  | bi  | 1 | <a href="#">367</a>  | bi  | 1 | <a href="#">490</a>  |
| 1 | <a href="#">584</a>  | 276  | bi  | 1 | <a href="#">980</a>  | bi  | 1 | <a href="#">465</a>  | bi  | 1 | <a href="#">368</a>  | bi  | 1 | <a href="#">491</a>  |
| 1 | <a href="#">585</a>  | 323  | bi  | 1 | <a href="#">981</a>  | bi  | 1 | <a href="#">466</a>  | bi  | 1 | <a href="#">369</a>  | bi  | 1 | <a href="#">492</a>  |
| 1 | <a href="#">586</a>  | 320  | bi  | 1 | <a href="#">982</a>  | bi  | 1 | <a href="#">467</a>  | bi  | 1 | <a href="#">370</a>  | bi  | 1 | <a href="#">493</a>  |
| 1 | <a href="#">587</a>  | 110  | bi  | 1 | <a href="#">983</a>  | bi  | 1 | <a href="#">468</a>  | bi  | 1 | <a href="#">371</a>  | bi  | 1 | <a href="#">494</a>  |

|   |                      |     |     |   |                      |     |   |                     |     |   |                     |     |   |                     |
|---|----------------------|-----|-----|---|----------------------|-----|---|---------------------|-----|---|---------------------|-----|---|---------------------|
| 1 | <a href="#">588</a>  | 206 | bi  | 1 | <a href="#">984</a>  | bi  | 1 | <a href="#">469</a> | bi  | 1 | <a href="#">372</a> | bi  | 1 | <a href="#">495</a> |
| 1 | <a href="#">589</a>  | 338 | bi  | 1 | <a href="#">985</a>  | bi  | 1 | <a href="#">470</a> | bi  | 1 | <a href="#">373</a> | bi  | 1 | <a href="#">496</a> |
| 1 | <a href="#">3291</a> | 172 | bi  | 1 | <a href="#">986</a>  | bi  | 1 | <a href="#">471</a> | bi  | 1 | <a href="#">374</a> | bi  | 1 | <a href="#">497</a> |
| 1 | <a href="#">3292</a> | 143 | uni | 1 | <a href="#">986</a>  | uni | 1 | <a href="#">471</a> | uni | 1 | <a href="#">374</a> | uni | 1 | <a href="#">497</a> |
| 1 | <a href="#">590</a>  | 109 | bi  | 1 | <a href="#">987</a>  | bi  | 1 | <a href="#">472</a> | bi  | 1 | <a href="#">375</a> | bi  | 1 | <a href="#">498</a> |
| 1 | <a href="#">591</a>  | 93  | bi  | 1 | <a href="#">988</a>  | bi  | 1 | <a href="#">473</a> | bi  | 1 | <a href="#">376</a> | bi  | 1 | <a href="#">499</a> |
| 1 | <a href="#">592</a>  | 312 | bi  | 1 | <a href="#">989</a>  | bi  | 1 | <a href="#">474</a> | bi  | 1 | <a href="#">377</a> | bi  | 1 | <a href="#">500</a> |
| 1 | <a href="#">593</a>  | 199 | bi  | 1 | <a href="#">990</a>  | bi  | 1 | <a href="#">475</a> | bi  | 1 | <a href="#">378</a> | bi  | 1 | <a href="#">501</a> |
| 1 | <a href="#">594</a>  | 282 | bi  | 1 | <a href="#">991</a>  | bi  | 1 | <a href="#">476</a> | bi  | 1 | <a href="#">379</a> | bi  | 1 | <a href="#">502</a> |
| 1 | <a href="#">595</a>  | 254 | bi  | 1 | <a href="#">992</a>  | bi  | 1 | <a href="#">477</a> | bi  | 1 | <a href="#">380</a> | bi  | 1 | <a href="#">503</a> |
| 1 | <a href="#">596</a>  | 467 | bi  | 1 | <a href="#">993</a>  | bi  | 1 | <a href="#">478</a> | bi  | 1 | <a href="#">381</a> | bi  | 1 | <a href="#">504</a> |
| 1 | <a href="#">597</a>  | 217 | bi  | 1 | <a href="#">994</a>  | bi  | 1 | <a href="#">479</a> | bi  | 1 | <a href="#">382</a> | bi  | 1 | <a href="#">505</a> |
| 1 | <a href="#">598</a>  | 447 | bi  | 1 | <a href="#">996</a>  | bi  | 1 | <a href="#">480</a> | bi  | 1 | <a href="#">383</a> | bi  | 1 | <a href="#">506</a> |
| 1 | <a href="#">599</a>  | 603 | bi  | 1 | <a href="#">997</a>  | bi  | 1 | <a href="#">481</a> | bi  | 1 | <a href="#">384</a> | bi  | 1 | <a href="#">507</a> |
| 1 | <a href="#">600</a>  | 170 | bi  | 1 | <a href="#">998</a>  | bi  | 1 | <a href="#">482</a> | bi  | 1 | <a href="#">385</a> | bi  | 1 | <a href="#">508</a> |
| 1 | <a href="#">601</a>  | 243 | bi  | 1 | <a href="#">999</a>  | bi  | 1 | <a href="#">483</a> | bi  | 1 | <a href="#">386</a> | bi  | 1 | <a href="#">509</a> |
| 1 | <a href="#">602</a>  | 157 | bi  | 1 | <a href="#">1000</a> | bi  | 1 | <a href="#">484</a> | bi  | 1 | <a href="#">387</a> | bi  | 1 | <a href="#">510</a> |
| 1 | <a href="#">603</a>  | 58  | bi  | 1 | <a href="#">1001</a> | bi  | 1 | <a href="#">485</a> | bi  | 1 | <a href="#">388</a> | bi  | 1 | <a href="#">511</a> |
| 1 | <a href="#">604</a>  | 325 | bi  | 1 | <a href="#">1002</a> | bi  | 1 | <a href="#">486</a> | bi  | 1 | <a href="#">389</a> | bi  | 1 | <a href="#">512</a> |
| 1 | <a href="#">605</a>  | 191 | bi  | 1 | <a href="#">1003</a> | bi  | 1 | <a href="#">487</a> | bi  | 1 | <a href="#">390</a> | bi  | 1 | <a href="#">513</a> |
| 1 | <a href="#">606</a>  | 509 | bi  | 1 | <a href="#">1005</a> | bi  | 1 | <a href="#">489</a> | bi  | 1 | <a href="#">391</a> | bi  | 1 | <a href="#">515</a> |
| 1 | <a href="#">607</a>  | 550 | bi  | 1 | <a href="#">1006</a> | bi  | 1 | <a href="#">490</a> | bi  | 1 | <a href="#">392</a> | bi  | 1 | <a href="#">516</a> |
| 1 | <a href="#">3293</a> | 247 | bi  | 1 | <a href="#">1007</a> | bi  | 1 | <a href="#">491</a> | bi  | 1 | <a href="#">393</a> | bi  | 1 | <a href="#">517</a> |
| 1 | <a href="#">608</a>  | 472 | bi  | 1 | <a href="#">1008</a> | bi  | 1 | <a href="#">492</a> | bi  | 1 | <a href="#">394</a> | bi  | 1 | <a href="#">518</a> |
| 1 | <a href="#">609</a>  | 78  | bi  | 1 | <a href="#">1009</a> | bi  | 1 | <a href="#">493</a> | bi  | 1 | <a href="#">395</a> | bi  | 1 | <a href="#">519</a> |
| 1 | <a href="#">610</a>  | 340 | bi  | 1 | <a href="#">1010</a> | bi  | 1 | <a href="#">498</a> | bi  | 1 | <a href="#">400</a> | bi  | 1 | <a href="#">520</a> |
| 1 | <a href="#">611</a>  | 318 | bi  | 1 | <a href="#">1013</a> | bi  | 1 | <a href="#">499</a> | bi  | 1 | <a href="#">401</a> | bi  | 1 | <a href="#">521</a> |
| 1 | <a href="#">612</a>  | 506 | bi  | 1 | <a href="#">1014</a> | bi  | 1 | <a href="#">500</a> | bi  | 1 | <a href="#">402</a> | bi  | 1 | <a href="#">522</a> |
| 1 | <a href="#">613</a>  | 152 | bi  | 1 | <a href="#">1015</a> | bi  | 1 | <a href="#">501</a> | bi  | 1 | <a href="#">403</a> | bi  | 1 | <a href="#">523</a> |
| 1 | <a href="#">614</a>  | 503 | bi  | 1 | <a href="#">1016</a> | bi  | 1 | <a href="#">502</a> | bi  | 1 | <a href="#">404</a> | bi  | 1 | <a href="#">524</a> |
| 1 | <a href="#">615</a>  | 185 | bi  | 1 | <a href="#">1017</a> | bi  | 1 | <a href="#">503</a> | bi  | 1 | <a href="#">405</a> | bi  | 1 | <a href="#">525</a> |
| 1 | <a href="#">3294</a> | 288 | bi  | 1 | <a href="#">1018</a> | bi  | 1 | <a href="#">504</a> | bi  | 1 | <a href="#">406</a> | bi  | 1 | <a href="#">526</a> |
| 1 | <a href="#">616</a>  | 729 | bi  | 1 | <a href="#">1019</a> | bi  | 1 | <a href="#">505</a> | bi  | 1 | <a href="#">407</a> | bi  | 1 | <a href="#">527</a> |
| 1 | <a href="#">617</a>  | 114 | bi  | 1 | <a href="#">1020</a> | bi  | 1 | <a href="#">506</a> | bi  | 1 | <a href="#">408</a> | bi  | 1 | <a href="#">528</a> |
| 1 | <a href="#">618</a>  | 412 | bi  | 1 | <a href="#">1021</a> | bi  | 1 | <a href="#">507</a> | bi  | 1 | <a href="#">409</a> | bi  | 1 | <a href="#">529</a> |
| 1 | <a href="#">619</a>  | 904 | bi  | 1 | <a href="#">1022</a> | bi  | 1 | <a href="#">508</a> | bi  | 1 | <a href="#">410</a> | bi  | 1 | <a href="#">530</a> |
| 1 | <a href="#">620</a>  | 315 | bi  | 1 | <a href="#">1023</a> | bi  | 1 | <a href="#">509</a> | bi  | 1 | <a href="#">411</a> | bi  | 1 | <a href="#">531</a> |
| 1 | <a href="#">621</a>  | 343 | bi  | 1 | <a href="#">1024</a> | bi  | 1 | <a href="#">510</a> | bi  | 1 | <a href="#">412</a> | bi  | 1 | <a href="#">532</a> |
| 1 | <a href="#">622</a>  | 115 | bi  | 1 | <a href="#">1026</a> | bi  | 1 | <a href="#">511</a> | bi  | 1 | <a href="#">413</a> | bi  | 1 | <a href="#">533</a> |
| 1 | <a href="#">623</a>  | 142 | bi  | 1 | <a href="#">1027</a> | bi  | 1 | <a href="#">512</a> | bi  | 1 | <a href="#">414</a> | bi  | 1 | <a href="#">534</a> |
| 1 | <a href="#">624</a>  | 246 | bi  | 1 | <a href="#">1028</a> | bi  | 1 | <a href="#">513</a> | bi  | 1 | <a href="#">415</a> | bi  | 1 | <a href="#">535</a> |
| 1 | <a href="#">625</a>  | 404 | bi  | 1 | <a href="#">1029</a> | bi  | 1 | <a href="#">514</a> | bi  | 1 | <a href="#">416</a> | bi  | 1 | <a href="#">536</a> |
| 1 | <a href="#">626</a>  | 260 | bi  | 1 | <a href="#">1030</a> | bi  | 1 | <a href="#">515</a> | bi  | 1 | <a href="#">417</a> | bi  | 1 | <a href="#">537</a> |
| 1 | <a href="#">627</a>  | 215 | bi  | 1 | <a href="#">1031</a> | bi  | 1 | <a href="#">516</a> | bi  | 1 | <a href="#">418</a> | bi  | 1 | <a href="#">538</a> |
| 1 | <a href="#">628</a>  | 249 | bi  | 1 | <a href="#">1032</a> | bi  | 1 | <a href="#">517</a> | bi  | 1 | <a href="#">419</a> | bi  | 1 | <a href="#">539</a> |
| 1 | <a href="#">629</a>  | 309 | bi  | 1 | <a href="#">1033</a> | bi  | 1 | <a href="#">518</a> | bi  | 1 | <a href="#">420</a> | bi  | 1 | <a href="#">540</a> |
| 1 | <a href="#">630</a>  | 473 | bi  | 1 | <a href="#">1034</a> | bi  | 1 | <a href="#">519</a> | bi  | 1 | <a href="#">421</a> | bi  | 1 | <a href="#">541</a> |
| 1 | <a href="#">631</a>  | 154 | bi  | 1 | <a href="#">1035</a> | bi  | 1 | <a href="#">520</a> | bi  | 1 | <a href="#">422</a> | bi  | 1 | <a href="#">542</a> |
| 1 | <a href="#">632</a>  | 326 | bi  | 1 | <a href="#">1036</a> | bi  | 1 | <a href="#">521</a> | bi  | 1 | <a href="#">423</a> | bi  | 1 | <a href="#">543</a> |
| 1 | <a href="#">633</a>  | 178 | bi  | 1 | <a href="#">1037</a> | bi  | 1 | <a href="#">522</a> | bi  | 1 | <a href="#">424</a> | bi  | 1 | <a href="#">544</a> |
| 1 | <a href="#">634</a>  | 144 | bi  | 1 | <a href="#">1038</a> | bi  | 1 | <a href="#">523</a> | bi  | 1 | <a href="#">425</a> | bi  | 1 | <a href="#">545</a> |
| 1 | <a href="#">635</a>  | 382 | bi  | 1 | <a href="#">1039</a> | bi  | 1 | <a href="#">524</a> | bi  | 1 | <a href="#">426</a> | bi  | 1 | <a href="#">546</a> |
| 1 | <a href="#">636</a>  | 460 | bi  | 1 | <a href="#">1040</a> | bi  | 1 | <a href="#">525</a> | bi  | 1 | <a href="#">427</a> | bi  | 1 | <a href="#">547</a> |
| 1 | <a href="#">637</a>  | 525 | bi  | 1 | <a href="#">1041</a> | bi  | 1 | <a href="#">526</a> | bi  | 1 | <a href="#">428</a> | bi  | 1 | <a href="#">548</a> |
| 1 | <a href="#">638</a>  | 148 | bi  | 1 | <a href="#">1054</a> | bi  | 1 | <a href="#">527</a> | bi  | 1 | <a href="#">429</a> | bi  | 1 | <a href="#">549</a> |
| 1 | <a href="#">639</a>  | 216 | bi  | 1 | <a href="#">1055</a> | bi  | 1 | <a href="#">528</a> | bi  | 1 | <a href="#">430</a> | bi  | 1 | <a href="#">550</a> |
| 1 | <a href="#">640</a>  | 357 | bi  | 1 | <a href="#">1056</a> | bi  | 1 | <a href="#">529</a> | bi  | 1 | <a href="#">431</a> | bi  | 1 | <a href="#">551</a> |

|   |                     |     |     |   |                      |     |   |                     |     |   |                     |     |   |                     |
|---|---------------------|-----|-----|---|----------------------|-----|---|---------------------|-----|---|---------------------|-----|---|---------------------|
| 1 | <a href="#">641</a> | 105 | bi  | 1 | <a href="#">1057</a> | bi  | 1 | <a href="#">530</a> | bi  | 1 | <a href="#">432</a> | bi  | 1 | <a href="#">552</a> |
| 1 | <a href="#">642</a> | 751 | bi  | 1 | <a href="#">1058</a> | bi  | 1 | <a href="#">531</a> | bi  | 1 | <a href="#">433</a> | bi  | 1 | <a href="#">553</a> |
| 1 | <a href="#">643</a> | 59  | bi  | 1 | <a href="#">1059</a> | bi  | 1 | <a href="#">532</a> | -   |   |                     | bi  | 1 | <a href="#">554</a> |
| 1 | <a href="#">644</a> | 64  | bi  | 1 | <a href="#">1060</a> | bi  | 1 | <a href="#">533</a> | bi  | 1 | <a href="#">434</a> | bi  | 1 | <a href="#">555</a> |
| 1 | <a href="#">645</a> | 89  | bi  | 1 | <a href="#">1061</a> | bi  | 1 | <a href="#">534</a> | bi  | 1 | <a href="#">435</a> | bi  | 1 | <a href="#">556</a> |
| 1 | <a href="#">646</a> | 576 | bi  | 1 | <a href="#">1062</a> | bi  | 1 | <a href="#">535</a> | bi  | 1 | <a href="#">436</a> | bi  | 1 | <a href="#">557</a> |
| 1 | <a href="#">647</a> | 315 | bi  | 1 | <a href="#">1063</a> | bi  | 1 | <a href="#">536</a> | bi  | 1 | <a href="#">437</a> | bi  | 1 | <a href="#">558</a> |
| 1 | <a href="#">648</a> | 246 | bi  | 1 | <a href="#">1065</a> | bi  | 1 | <a href="#">537</a> | bi  | 1 | <a href="#">438</a> | bi  | 1 | <a href="#">559</a> |
| 1 | <a href="#">649</a> | 764 | bi  | 1 | <a href="#">1066</a> | bi  | 1 | <a href="#">538</a> | bi  | 1 | <a href="#">439</a> | bi  | 1 | <a href="#">560</a> |
| 1 | <a href="#">650</a> | 428 | bi  | 1 | <a href="#">1068</a> | bi  | 1 | <a href="#">539</a> | bi  | 1 | <a href="#">440</a> | bi  | 1 | <a href="#">561</a> |
| 1 | <a href="#">651</a> | 221 | bi  | 1 | <a href="#">1069</a> | bi  | 1 | <a href="#">540</a> | bi  | 1 | <a href="#">441</a> | bi  | 1 | <a href="#">562</a> |
| 1 | <a href="#">652</a> | 641 | bi  | 1 | <a href="#">1070</a> | bi  | 1 | <a href="#">541</a> | bi  | 1 | <a href="#">442</a> | bi  | 1 | <a href="#">563</a> |
| 1 | <a href="#">653</a> | 306 | bi  | 1 | <a href="#">1071</a> | bi  | 1 | <a href="#">542</a> | bi  | 1 | <a href="#">443</a> | bi  | 1 | <a href="#">564</a> |
| 1 | <a href="#">654</a> | 251 | bi  | 1 | <a href="#">1072</a> | bi  | 1 | <a href="#">543</a> | bi  | 1 | <a href="#">444</a> | bi  | 1 | <a href="#">565</a> |
| 1 | <a href="#">655</a> | 520 | bi  | 1 | <a href="#">1073</a> | bi  | 1 | <a href="#">544</a> | bi  | 1 | <a href="#">445</a> | bi  | 1 | <a href="#">566</a> |
| 1 | <a href="#">656</a> | 753 | bi  | 1 | <a href="#">1074</a> | bi  | 1 | <a href="#">545</a> | bi  | 1 | <a href="#">446</a> | bi  | 1 | <a href="#">567</a> |
| 1 | <a href="#">657</a> | 677 | bi  | 1 | <a href="#">1075</a> | bi  | 1 | <a href="#">546</a> | bi  | 1 | <a href="#">447</a> | bi  | 1 | <a href="#">568</a> |
| 1 | <a href="#">658</a> | 39  | bi  | 1 | <a href="#">1076</a> | bi  | 1 | <a href="#">547</a> | bi  | 1 | <a href="#">448</a> | bi  | 1 | <a href="#">569</a> |
| 1 | <a href="#">659</a> | 102 | bi  | 1 | <a href="#">1077</a> | bi  | 1 | <a href="#">548</a> | bi  | 1 | <a href="#">449</a> | bi  | 1 | <a href="#">570</a> |
| 1 | <a href="#">660</a> | 490 | bi  | 1 | <a href="#">1078</a> | bi  | 1 | <a href="#">549</a> | bi  | 1 | <a href="#">450</a> | bi  | 1 | <a href="#">571</a> |
| 1 | <a href="#">661</a> | 477 | bi  | 1 | <a href="#">1079</a> | bi  | 1 | <a href="#">550</a> | bi  | 1 | <a href="#">451</a> | bi  | 1 | <a href="#">572</a> |
| 1 | <a href="#">662</a> | 363 | bi  | 1 | <a href="#">1080</a> | bi  | 1 | <a href="#">551</a> | bi  | 1 | <a href="#">452</a> | bi  | 1 | <a href="#">573</a> |
| 1 | <a href="#">663</a> | 458 | bi  | 1 | <a href="#">1081</a> | bi  | 1 | <a href="#">552</a> | bi  | 1 | <a href="#">453</a> | bi  | 1 | <a href="#">574</a> |
| 1 | <a href="#">664</a> | 106 | bi  | 1 | <a href="#">1083</a> | bi  | 1 | <a href="#">555</a> | bi  | 1 | <a href="#">455</a> | bi  | 1 | <a href="#">576</a> |
| 1 | <a href="#">665</a> | 282 | bi  | 1 | <a href="#">1084</a> | bi  | 1 | <a href="#">556</a> | bi  | 1 | <a href="#">456</a> | bi  | 1 | <a href="#">577</a> |
| 1 | <a href="#">666</a> | 340 | bi  | 1 | <a href="#">1085</a> | bi  | 1 | <a href="#">557</a> | bi  | 1 | <a href="#">457</a> | bi  | 1 | <a href="#">578</a> |
| 1 | <a href="#">667</a> | 459 | bi  | 1 | <a href="#">1086</a> | bi  | 1 | <a href="#">558</a> | bi  | 1 | <a href="#">458</a> | bi  | 1 | <a href="#">579</a> |
| 1 | <a href="#">668</a> | 338 | bi  | 1 | <a href="#">1087</a> | bi  | 1 | <a href="#">559</a> | bi  | 1 | <a href="#">459</a> | bi  | 1 | <a href="#">580</a> |
| 1 | <a href="#">669</a> | 310 | bi  | 1 | <a href="#">1088</a> | bi  | 1 | <a href="#">560</a> | bi  | 1 | <a href="#">460</a> | bi  | 1 | <a href="#">581</a> |
| 1 | <a href="#">670</a> | 529 | bi  | 1 | <a href="#">1089</a> | bi  | 1 | <a href="#">561</a> | bi  | 1 | <a href="#">461</a> | bi  | 1 | <a href="#">582</a> |
| 1 | <a href="#">671</a> | 48  | bi  | 1 | <a href="#">1090</a> | -   |   |                     | bi  | 1 | <a href="#">462</a> | -   |   |                     |
| 1 | <a href="#">672</a> | 227 | bi  | 1 | <a href="#">1091</a> | bi  | 1 | <a href="#">562</a> | bi  | 1 | <a href="#">463</a> | bi  | 1 | <a href="#">583</a> |
| 1 | <a href="#">673</a> | 215 | bi  | 1 | <a href="#">1092</a> | bi  | 1 | <a href="#">563</a> | bi  | 1 | <a href="#">464</a> | bi  | 1 | <a href="#">584</a> |
| 1 | <a href="#">674</a> | 144 | bi  | 1 | <a href="#">1093</a> | bi  | 1 | <a href="#">564</a> | bi  | 1 | <a href="#">465</a> | bi  | 1 | <a href="#">585</a> |
| 1 | <a href="#">675</a> | 129 | bi  | 1 | <a href="#">1094</a> | bi  | 1 | <a href="#">565</a> | bi  | 1 | <a href="#">466</a> | bi  | 1 | <a href="#">586</a> |
| 1 | <a href="#">676</a> | 112 | bi  | 1 | <a href="#">1095</a> | bi  | 1 | <a href="#">566</a> | bi  | 1 | <a href="#">467</a> | bi  | 1 | <a href="#">587</a> |
| 1 | <a href="#">677</a> | 464 | bi  | 1 | <a href="#">1096</a> | bi  | 1 | <a href="#">567</a> | bi  | 1 | <a href="#">468</a> | bi  | 1 | <a href="#">588</a> |
| 1 | <a href="#">678</a> | 127 | bi  | 1 | <a href="#">1097</a> | bi  | 1 | <a href="#">568</a> | bi  | 1 | <a href="#">469</a> | bi  | 1 | <a href="#">589</a> |
| 1 | <a href="#">679</a> | 389 | bi  | 1 | <a href="#">1098</a> | bi  | 1 | <a href="#">569</a> | bi  | 1 | <a href="#">470</a> | bi  | 1 | <a href="#">590</a> |
| 1 | <a href="#">680</a> | 237 | bi  | 1 | <a href="#">1099</a> | bi  | 1 | <a href="#">570</a> | bi  | 1 | <a href="#">471</a> | bi  | 1 | <a href="#">591</a> |
| 1 | <a href="#">681</a> | 317 | bi  | 1 | <a href="#">1100</a> | bi  | 1 | <a href="#">571</a> | bi  | 1 | <a href="#">472</a> | bi  | 1 | <a href="#">592</a> |
| 1 | <a href="#">682</a> | 113 | bi  | 1 | <a href="#">1101</a> | bi  | 1 | <a href="#">572</a> | bi  | 1 | <a href="#">473</a> | bi  | 1 | <a href="#">594</a> |
| 1 | <a href="#">683</a> | 244 | bi  | 1 | <a href="#">1102</a> | bi  | 1 | <a href="#">573</a> | bi  | 1 | <a href="#">474</a> | bi  | 1 | <a href="#">595</a> |
| 1 | <a href="#">684</a> | 260 | bi  | 1 | <a href="#">1103</a> | bi  | 1 | <a href="#">574</a> | bi  | 1 | <a href="#">475</a> | bi  | 1 | <a href="#">596</a> |
| 1 | <a href="#">685</a> | 700 | bi  | 1 | <a href="#">1104</a> | bi  | 1 | <a href="#">575</a> | bi  | 1 | <a href="#">476</a> | bi  | 1 | <a href="#">597</a> |
| 1 | <a href="#">686</a> | 247 | bi  | 1 | <a href="#">1105</a> | bi  | 1 | <a href="#">576</a> | bi  | 1 | <a href="#">477</a> | bi  | 1 | <a href="#">598</a> |
| 1 | <a href="#">687</a> | 365 | bi  | 1 | <a href="#">1106</a> | bi  | 1 | <a href="#">577</a> | bi  | 1 | <a href="#">478</a> | bi  | 1 | <a href="#">599</a> |
| 1 | <a href="#">688</a> | 150 | bi  | 1 | <a href="#">1107</a> | bi  | 1 | <a href="#">578</a> | bi  | 1 | <a href="#">479</a> | bi  | 1 | <a href="#">600</a> |
| 1 | <a href="#">689</a> | 483 | bi  | 1 | <a href="#">1108</a> | bi  | 1 | <a href="#">579</a> | bi  | 1 | <a href="#">480</a> | bi  | 1 | <a href="#">601</a> |
| 1 | <a href="#">690</a> | 635 | bi  | 1 | <a href="#">1109</a> | bi  | 1 | <a href="#">580</a> | bi  | 1 | <a href="#">481</a> | bi  | 1 | <a href="#">602</a> |
| 1 | <a href="#">691</a> | 240 | bi  | 1 | <a href="#">1110</a> | bi  | 1 | <a href="#">581</a> | bi  | 1 | <a href="#">482</a> | bi  | 1 | <a href="#">603</a> |
| 1 | <a href="#">692</a> | 246 | bi  | 1 | <a href="#">1111</a> | bi  | 1 | <a href="#">582</a> | bi  | 1 | <a href="#">483</a> | bi  | 1 | <a href="#">604</a> |
| 1 | <a href="#">693</a> | 723 | bi  | 1 | <a href="#">1112</a> | bi  | 1 | <a href="#">583</a> | bi  | 1 | <a href="#">484</a> | bi  | 1 | <a href="#">605</a> |
| 1 | <a href="#">694</a> | 666 | bi  | 1 | <a href="#">1113</a> | bi  | 1 | <a href="#">584</a> | bi  | 1 | <a href="#">485</a> | bi  | 1 | <a href="#">606</a> |
| 1 | <a href="#">695</a> | 940 | bi  | 1 | <a href="#">1114</a> | bi  | 1 | <a href="#">585</a> | bi  | 1 | <a href="#">486</a> | bi  | 1 | <a href="#">607</a> |
| 1 | <a href="#">696</a> | 189 | uni | 1 | <a href="#">1115</a> | bi  | 1 | <a href="#">586</a> | uni | 1 | <a href="#">487</a> | bi  | 1 | <a href="#">608</a> |
| 1 | <a href="#">697</a> | 52  | bi  | 1 | <a href="#">1115</a> | uni | 1 | <a href="#">586</a> | bi  | 1 | <a href="#">487</a> | uni | 1 | <a href="#">608</a> |

|   |                      |      |     |   |                      |    |   |                     |    |   |                     |     |   |                      |
|---|----------------------|------|-----|---|----------------------|----|---|---------------------|----|---|---------------------|-----|---|----------------------|
| 1 | <a href="#">698</a>  | 296  | bi  | 1 | <a href="#">1116</a> | bi | 1 | <a href="#">587</a> | bi | 1 | <a href="#">488</a> | bi  | 1 | <a href="#">609</a>  |
| 1 | <a href="#">699</a>  | 332  | bi  | 1 | <a href="#">1117</a> | bi | 1 | <a href="#">588</a> | bi | 1 | <a href="#">489</a> | bi  | 1 | <a href="#">610</a>  |
| 1 | <a href="#">700</a>  | 312  | bi  | 1 | <a href="#">1118</a> | bi | 1 | <a href="#">589</a> | bi | 1 | <a href="#">490</a> | bi  | 1 | <a href="#">611</a>  |
| 1 | <a href="#">701</a>  | 308  | bi  | 1 | <a href="#">1119</a> | bi | 1 | <a href="#">590</a> | bi | 1 | <a href="#">491</a> | bi  | 1 | <a href="#">612</a>  |
| 1 | <a href="#">702</a>  | 173  | bi  | 1 | <a href="#">1120</a> | bi | 1 | <a href="#">591</a> | bi | 1 | <a href="#">492</a> | bi  | 1 | <a href="#">613</a>  |
| 1 | <a href="#">703</a>  | 198  | bi  | 1 | <a href="#">1121</a> | bi | 1 | <a href="#">592</a> | bi | 1 | <a href="#">493</a> | bi  | 1 | <a href="#">614</a>  |
| 1 | <a href="#">704</a>  | 173  | bi  | 1 | <a href="#">1122</a> | bi | 1 | <a href="#">593</a> | bi | 1 | <a href="#">494</a> | bi  | 1 | <a href="#">615</a>  |
| 1 | <a href="#">705</a>  | 135  | bi  | 1 | <a href="#">1123</a> | bi | 1 | <a href="#">594</a> | bi | 1 | <a href="#">495</a> | bi  | 1 | <a href="#">616</a>  |
| 1 | <a href="#">706</a>  | 963  | bi  | 1 | <a href="#">1124</a> | bi | 1 | <a href="#">595</a> | bi | 1 | <a href="#">496</a> | bi  | 1 | <a href="#">617</a>  |
| 1 | <a href="#">707</a>  | 128  | bi  | 1 | <a href="#">1125</a> | bi | 1 | <a href="#">596</a> | bi | 1 | <a href="#">497</a> | bi  | 1 | <a href="#">618</a>  |
| 1 | <a href="#">708</a>  | 170  | bi  | 1 | <a href="#">1126</a> | bi | 1 | <a href="#">597</a> | bi | 1 | <a href="#">498</a> | bi  | 1 | <a href="#">619</a>  |
| 1 | <a href="#">709</a>  | 596  | bi  | 1 | <a href="#">1127</a> | bi | 1 | <a href="#">598</a> | bi | 1 | <a href="#">499</a> | bi  | 1 | <a href="#">620</a>  |
| 1 | <a href="#">710</a>  | 136  | bi  | 1 | <a href="#">1128</a> | bi | 1 | <a href="#">599</a> | bi | 1 | <a href="#">500</a> | bi  | 1 | <a href="#">621</a>  |
| 1 | <a href="#">711</a>  | 67   | bi  | 1 | <a href="#">1129</a> | bi | 1 | <a href="#">600</a> | bi | 1 | <a href="#">501</a> | bi  | 1 | <a href="#">622</a>  |
| 1 | <a href="#">712</a>  | 438  | bi  | 1 | <a href="#">1130</a> | bi | 1 | <a href="#">601</a> | bi | 1 | <a href="#">502</a> | bi  | 1 | <a href="#">623</a>  |
| 1 | <a href="#">713</a>  | 626  | bi  | 1 | <a href="#">1131</a> | bi | 1 | <a href="#">602</a> | bi | 1 | <a href="#">503</a> | bi  | 1 | <a href="#">624</a>  |
| 1 | <a href="#">714</a>  | 395  | bi  | 1 | <a href="#">1132</a> | bi | 1 | <a href="#">603</a> | bi | 1 | <a href="#">504</a> | bi  | 1 | <a href="#">625</a>  |
| 1 | <a href="#">715</a>  | 489  | bi  | 1 | <a href="#">1133</a> | bi | 1 | <a href="#">604</a> | bi | 1 | <a href="#">505</a> | bi  | 1 | <a href="#">626</a>  |
| 1 | <a href="#">716</a>  | 264  | bi  | 1 | <a href="#">1134</a> | bi | 1 | <a href="#">605</a> | bi | 1 | <a href="#">506</a> | bi  | 1 | <a href="#">627</a>  |
| 1 | <a href="#">717</a>  | 221  | bi  | 1 | <a href="#">1136</a> | bi | 1 | <a href="#">606</a> | bi | 1 | <a href="#">507</a> | bi  | 1 | <a href="#">628</a>  |
| 1 | <a href="#">718</a>  | 572  | bi  | 1 | <a href="#">1137</a> | bi | 1 | <a href="#">607</a> | bi | 1 | <a href="#">508</a> | bi  | 1 | <a href="#">629</a>  |
| 1 | <a href="#">719</a>  | 590  | bi  | 1 | <a href="#">1138</a> | bi | 1 | <a href="#">608</a> | bi | 1 | <a href="#">509</a> | bi  | 1 | <a href="#">630</a>  |
| 1 | <a href="#">720</a>  | 202  | bi  | 1 | <a href="#">1139</a> | bi | 1 | <a href="#">609</a> | bi | 1 | <a href="#">510</a> | bi  | 1 | <a href="#">631</a>  |
| 1 | <a href="#">721</a>  | 360  | bi  | 1 | <a href="#">1140</a> | bi | 1 | <a href="#">610</a> | bi | 1 | <a href="#">511</a> | bi  | 1 | <a href="#">632</a>  |
| 1 | <a href="#">722</a>  | 223  | bi  | 1 | <a href="#">1141</a> | bi | 1 | <a href="#">611</a> | bi | 1 | <a href="#">512</a> | bi  | 1 | <a href="#">633</a>  |
| 1 | <a href="#">723</a>  | 188  | bi  | 1 | <a href="#">1142</a> | bi | 1 | <a href="#">612</a> | bi | 1 | <a href="#">513</a> | bi  | 1 | <a href="#">634</a>  |
| 1 | <a href="#">724</a>  | 323  | bi  | 1 | <a href="#">1143</a> | bi | 1 | <a href="#">613</a> | bi | 1 | <a href="#">514</a> | bi  | 1 | <a href="#">635</a>  |
| 1 | <a href="#">725</a>  | 217  | bi  | 1 | <a href="#">1144</a> | bi | 1 | <a href="#">614</a> | bi | 1 | <a href="#">515</a> | bi  | 1 | <a href="#">636</a>  |
| 1 | <a href="#">726</a>  | 342  | bi  | 1 | <a href="#">1145</a> | bi | 1 | <a href="#">615</a> | bi | 1 | <a href="#">516</a> | bi  | 1 | <a href="#">637</a>  |
| 1 | <a href="#">727</a>  | 220  | bi  | 1 | <a href="#">1146</a> | bi | 1 | <a href="#">616</a> | bi | 1 | <a href="#">517</a> | bi  | 1 | <a href="#">638</a>  |
| 1 | <a href="#">728</a>  | 738  | bi  | 1 | <a href="#">1148</a> | bi | 1 | <a href="#">617</a> | bi | 1 | <a href="#">518</a> | bi  | 1 | <a href="#">639</a>  |
| 1 | <a href="#">729</a>  | 805  | bi  | 1 | <a href="#">1149</a> | bi | 1 | <a href="#">618</a> | bi | 1 | <a href="#">519</a> | bi  | 1 | <a href="#">640</a>  |
| 1 | <a href="#">730</a>  | 97   | bi  | 1 | <a href="#">1150</a> | bi | 1 | <a href="#">619</a> | bi | 1 | <a href="#">520</a> | bi  | 1 | <a href="#">641</a>  |
| 1 | <a href="#">731</a>  | 148  | bi  | 1 | <a href="#">1151</a> | bi | 1 | <a href="#">620</a> | bi | 1 | <a href="#">521</a> | bi  | 1 | <a href="#">642</a>  |
| 1 | <a href="#">732</a>  | 277  | bi  | 1 | <a href="#">1152</a> | bi | 1 | <a href="#">623</a> | bi | 1 | <a href="#">522</a> | bi  | 1 | <a href="#">643</a>  |
| 1 | <a href="#">733</a>  | 212  | bi  | 1 | <a href="#">1153</a> | bi | 1 | <a href="#">624</a> | bi | 1 | <a href="#">523</a> | bi  | 1 | <a href="#">644</a>  |
| 1 | <a href="#">734</a>  | 214  | bi  | 1 | <a href="#">1154</a> | bi | 1 | <a href="#">625</a> | bi | 1 | <a href="#">524</a> | bi  | 1 | <a href="#">645</a>  |
| 1 | <a href="#">735</a>  | 544  | bi  | 1 | <a href="#">1155</a> | bi | 1 | <a href="#">626</a> | bi | 1 | <a href="#">525</a> | bi  | 1 | <a href="#">646</a>  |
| 1 | <a href="#">736</a>  | 32   | -   |   |                      | -  |   |                     | -  |   |                     | -   |   |                      |
| 1 | <a href="#">737</a>  | 83   | bi  | 1 | <a href="#">1156</a> | bi | 1 | <a href="#">627</a> | bi | 1 | <a href="#">526</a> | bi  | 1 | <a href="#">647</a>  |
| 1 | <a href="#">738</a>  | 575  | uni | 1 | <a href="#">2471</a> | bi | 1 | <a href="#">628</a> | bi | 1 | <a href="#">527</a> | -   |   |                      |
| 1 | <a href="#">739</a>  | 276  | uni | 1 | <a href="#">2474</a> | bi | 1 | <a href="#">629</a> | bi | 1 | <a href="#">528</a> | -   |   |                      |
| 1 | <a href="#">740</a>  | 388  | uni | 1 | <a href="#">2470</a> | bi | 1 | <a href="#">630</a> | bi | 1 | <a href="#">529</a> | -   |   |                      |
| 1 | <a href="#">741</a>  | 593  | uni | 1 | <a href="#">2144</a> | bi | 1 | <a href="#">631</a> | bi | 1 | <a href="#">530</a> | uni | 1 | <a href="#">1613</a> |
| 1 | <a href="#">742</a>  | 236  | bi  | 1 | <a href="#">2157</a> | bi | 1 | <a href="#">632</a> | bi | 1 | <a href="#">531</a> | bi  | 1 | <a href="#">370</a>  |
| 1 | <a href="#">743</a>  | 309  | uni | 1 | <a href="#">2121</a> | bi | 1 | <a href="#">633</a> | bi | 1 | <a href="#">532</a> | uni | 1 | <a href="#">1612</a> |
| 1 | <a href="#">744</a>  | 264  | bi  | 1 | <a href="#">2152</a> | bi | 1 | <a href="#">634</a> | bi | 1 | <a href="#">533</a> | uni | 1 | <a href="#">335</a>  |
| 1 | <a href="#">745</a>  | 270  | uni | 1 | <a href="#">2119</a> | bi | 1 | <a href="#">635</a> | bi | 1 | <a href="#">534</a> | uni | 1 | <a href="#">1610</a> |
| 1 | <a href="#">746</a>  | 1005 | uni | 1 | <a href="#">109</a>  | bi | 1 | <a href="#">636</a> | bi | 1 | <a href="#">535</a> | uni | 1 | <a href="#">2467</a> |
| 1 | <a href="#">747</a>  | 108  | bi  | 1 | <a href="#">1157</a> | bi | 1 | <a href="#">637</a> | bi | 1 | <a href="#">536</a> | bi  | 1 | <a href="#">648</a>  |
| 1 | <a href="#">748</a>  | 203  | bi  | 1 | <a href="#">1158</a> | bi | 1 | <a href="#">638</a> | bi | 1 | <a href="#">537</a> | bi  | 1 | <a href="#">649</a>  |
| 1 | <a href="#">3295</a> | 261  | bi  | 1 | <a href="#">1159</a> | bi | 1 | <a href="#">639</a> | bi | 1 | <a href="#">538</a> | bi  | 1 | <a href="#">650</a>  |
| 1 | <a href="#">749</a>  | 227  | bi  | 1 | <a href="#">1160</a> | bi | 1 | <a href="#">640</a> | bi | 1 | <a href="#">539</a> | bi  | 1 | <a href="#">651</a>  |
| 1 | <a href="#">750</a>  | 47   | -   |   |                      | -  |   |                     | bi | 1 | <a href="#">225</a> | -   |   |                      |
| 1 | <a href="#">751</a>  | 152  | bi  | 1 | <a href="#">1161</a> | bi | 1 | <a href="#">641</a> | bi | 1 | <a href="#">540</a> | bi  | 1 | <a href="#">652</a>  |
| 1 | <a href="#">752</a>  | 210  | bi  | 1 | <a href="#">1162</a> | bi | 1 | <a href="#">642</a> | bi | 1 | <a href="#">541</a> | bi  | 1 | <a href="#">653</a>  |
| 1 | <a href="#">753</a>  | 114  | bi  | 1 | <a href="#">1163</a> | bi | 1 | <a href="#">643</a> | bi | 1 | <a href="#">542</a> | bi  | 1 | <a href="#">654</a>  |

|   |                     |     |     |   |                      |    |   |                      |    |   |                     |    |   |                      |
|---|---------------------|-----|-----|---|----------------------|----|---|----------------------|----|---|---------------------|----|---|----------------------|
| 1 | <a href="#">754</a> | 322 | bi  | 1 | <a href="#">1164</a> | bi | 1 | <a href="#">650</a>  | bi | 1 | <a href="#">543</a> | bi | 1 | <a href="#">655</a>  |
| 1 | <a href="#">755</a> | 640 | bi  | 1 | <a href="#">1165</a> | bi | 1 | <a href="#">651</a>  | bi | 1 | <a href="#">544</a> | bi | 1 | <a href="#">656</a>  |
| 1 | <a href="#">756</a> | 112 | bi  | 1 | <a href="#">1166</a> | bi | 1 | <a href="#">652</a>  | bi | 1 | <a href="#">545</a> | bi | 1 | <a href="#">657</a>  |
| 1 | <a href="#">757</a> | 119 | bi  | 1 | <a href="#">1167</a> | bi | 1 | <a href="#">653</a>  | bi | 1 | <a href="#">546</a> | bi | 1 | <a href="#">658</a>  |
| 1 | <a href="#">758</a> | 119 | bi  | 1 | <a href="#">1168</a> | bi | 1 | <a href="#">654</a>  | bi | 1 | <a href="#">547</a> | bi | 1 | <a href="#">659</a>  |
| 1 | <a href="#">759</a> | 260 | bi  | 1 | <a href="#">1169</a> | bi | 1 | <a href="#">655</a>  | bi | 1 | <a href="#">548</a> | bi | 1 | <a href="#">660</a>  |
| 1 | <a href="#">760</a> | 232 | bi  | 1 | <a href="#">1170</a> | bi | 1 | <a href="#">656</a>  | bi | 1 | <a href="#">549</a> | bi | 1 | <a href="#">661</a>  |
| 1 | <a href="#">761</a> | 438 | bi  | 1 | <a href="#">1171</a> | bi | 1 | <a href="#">657</a>  | bi | 1 | <a href="#">550</a> | bi | 1 | <a href="#">662</a>  |
| 1 | <a href="#">762</a> | 83  | bi  | 1 | <a href="#">1172</a> | -  |   |                      | -  |   |                     | bi | 1 | <a href="#">663</a>  |
| 1 | <a href="#">763</a> | 363 | bi  | 1 | <a href="#">1173</a> | bi | 1 | <a href="#">658</a>  | bi | 1 | <a href="#">551</a> | bi | 1 | <a href="#">664</a>  |
| 1 | <a href="#">764</a> | 370 | bi  | 1 | <a href="#">1174</a> | bi | 1 | <a href="#">659</a>  | bi | 1 | <a href="#">552</a> | bi | 1 | <a href="#">665</a>  |
| 1 | <a href="#">765</a> | 369 | bi  | 1 | <a href="#">1175</a> | bi | 1 | <a href="#">660</a>  | bi | 1 | <a href="#">553</a> | bi | 1 | <a href="#">666</a>  |
| 1 | <a href="#">766</a> | 248 | uni | 1 | <a href="#">1176</a> | bi | 1 | <a href="#">2586</a> | bi | 1 | <a href="#">554</a> | bi | 1 | <a href="#">2410</a> |
| 1 | <a href="#">767</a> | 337 | bi  | 1 | <a href="#">1178</a> | bi | 1 | <a href="#">662</a>  | bi | 1 | <a href="#">555</a> | bi | 1 | <a href="#">668</a>  |
| 1 | <a href="#">768</a> | 343 | bi  | 1 | <a href="#">1179</a> | bi | 1 | <a href="#">663</a>  | bi | 1 | <a href="#">556</a> | bi | 1 | <a href="#">669</a>  |
| 1 | <a href="#">769</a> | 149 | bi  | 1 | <a href="#">1180</a> | bi | 1 | <a href="#">664</a>  | bi | 1 | <a href="#">557</a> | bi | 1 | <a href="#">670</a>  |
| 1 | <a href="#">770</a> | 349 | bi  | 1 | <a href="#">1181</a> | bi | 1 | <a href="#">665</a>  | bi | 1 | <a href="#">558</a> | bi | 1 | <a href="#">671</a>  |
| 1 | <a href="#">771</a> | 31  | -   |   |                      | -  |   |                      | -  |   |                     | -  |   |                      |
| 1 | <a href="#">772</a> | 458 | bi  | 1 | <a href="#">1182</a> | bi | 1 | <a href="#">666</a>  | bi | 1 | <a href="#">559</a> | bi | 1 | <a href="#">672</a>  |
| 1 | <a href="#">773</a> | 537 | bi  | 1 | <a href="#">1183</a> | bi | 1 | <a href="#">667</a>  | bi | 1 | <a href="#">560</a> | bi | 1 | <a href="#">673</a>  |
| 1 | <a href="#">774</a> | 89  | -   |   |                      | -  |   |                      | -  |   |                     | -  |   |                      |
| 1 | <a href="#">775</a> | 118 | bi  | 1 | <a href="#">1186</a> | bi | 1 | <a href="#">669</a>  | bi | 1 | <a href="#">561</a> | bi | 1 | <a href="#">675</a>  |
| 1 | <a href="#">776</a> | 372 | bi  | 1 | <a href="#">1187</a> | bi | 1 | <a href="#">670</a>  | bi | 1 | <a href="#">562</a> | bi | 1 | <a href="#">676</a>  |
| 1 | <a href="#">777</a> | 126 | bi  | 1 | <a href="#">1188</a> | bi | 1 | <a href="#">671</a>  | bi | 1 | <a href="#">563</a> | bi | 1 | <a href="#">677</a>  |
| 1 | <a href="#">778</a> | 232 | bi  | 1 | <a href="#">1190</a> | bi | 1 | <a href="#">672</a>  | bi | 1 | <a href="#">564</a> | bi | 1 | <a href="#">678</a>  |
| 1 | <a href="#">779</a> | 432 | bi  | 1 | <a href="#">1191</a> | bi | 1 | <a href="#">673</a>  | bi | 1 | <a href="#">565</a> | bi | 1 | <a href="#">679</a>  |
| 1 | <a href="#">780</a> | 109 | -   |   |                      | bi | 1 | <a href="#">674</a>  | -  |   |                     | -  |   |                      |
| 1 | <a href="#">781</a> | 242 | bi  | 1 | <a href="#">1192</a> | bi | 1 | <a href="#">675</a>  | bi | 1 | <a href="#">566</a> | bi | 1 | <a href="#">680</a>  |
| 1 | <a href="#">782</a> | 493 | bi  | 1 | <a href="#">1194</a> | bi | 1 | <a href="#">677</a>  | bi | 1 | <a href="#">567</a> | bi | 1 | <a href="#">681</a>  |
| 1 | <a href="#">783</a> | 251 | bi  | 1 | <a href="#">1195</a> | bi | 1 | <a href="#">678</a>  | bi | 1 | <a href="#">568</a> | bi | 1 | <a href="#">682</a>  |
| 1 | <a href="#">784</a> | 77  | bi  | 1 | <a href="#">1196</a> | bi | 1 | <a href="#">679</a>  | bi | 1 | <a href="#">569</a> | bi | 1 | <a href="#">683</a>  |
| 1 | <a href="#">785</a> | 889 | bi  | 1 | <a href="#">1197</a> | bi | 1 | <a href="#">680</a>  | bi | 1 | <a href="#">570</a> | bi | 1 | <a href="#">684</a>  |
| 1 | <a href="#">786</a> | 390 | bi  | 1 | <a href="#">1198</a> | bi | 1 | <a href="#">681</a>  | bi | 1 | <a href="#">571</a> | bi | 1 | <a href="#">685</a>  |
| 1 | <a href="#">787</a> | 608 | bi  | 1 | <a href="#">1199</a> | bi | 1 | <a href="#">682</a>  | bi | 1 | <a href="#">572</a> | bi | 1 | <a href="#">686</a>  |
| 1 | <a href="#">788</a> | 155 | bi  | 1 | <a href="#">1202</a> | bi | 1 | <a href="#">683</a>  | bi | 1 | <a href="#">573</a> | bi | 1 | <a href="#">687</a>  |
| 1 | <a href="#">789</a> | 221 | bi  | 1 | <a href="#">1203</a> | bi | 1 | <a href="#">684</a>  | bi | 1 | <a href="#">574</a> | bi | 1 | <a href="#">688</a>  |
| 1 | <a href="#">790</a> | 308 | bi  | 1 | <a href="#">1204</a> | bi | 1 | <a href="#">685</a>  | bi | 1 | <a href="#">575</a> | bi | 1 | <a href="#">689</a>  |
| 1 | <a href="#">791</a> | 212 | bi  | 1 | <a href="#">1205</a> | bi | 1 | <a href="#">686</a>  | bi | 1 | <a href="#">576</a> | bi | 1 | <a href="#">690</a>  |
| 1 | <a href="#">792</a> | 398 | bi  | 1 | <a href="#">1206</a> | bi | 1 | <a href="#">687</a>  | bi | 1 | <a href="#">577</a> | bi | 1 | <a href="#">691</a>  |
| 1 | <a href="#">793</a> | 297 | bi  | 1 | <a href="#">1208</a> | bi | 1 | <a href="#">689</a>  | bi | 1 | <a href="#">579</a> | bi | 1 | <a href="#">693</a>  |
| 1 | <a href="#">794</a> | 344 | bi  | 1 | <a href="#">1209</a> | bi | 1 | <a href="#">690</a>  | bi | 1 | <a href="#">580</a> | bi | 1 | <a href="#">694</a>  |
| 1 | <a href="#">795</a> | 83  | bi  | 1 | <a href="#">1210</a> | bi | 1 | <a href="#">691</a>  | bi | 1 | <a href="#">581</a> | bi | 1 | <a href="#">695</a>  |
| 1 | <a href="#">796</a> | 882 | bi  | 1 | <a href="#">1212</a> | bi | 1 | <a href="#">692</a>  | bi | 1 | <a href="#">582</a> | bi | 1 | <a href="#">696</a>  |
| 1 | <a href="#">797</a> | 669 | bi  | 1 | <a href="#">1213</a> | bi | 1 | <a href="#">693</a>  | bi | 1 | <a href="#">583</a> | bi | 1 | <a href="#">697</a>  |
| 1 | <a href="#">798</a> | 233 | bi  | 1 | <a href="#">1214</a> | bi | 1 | <a href="#">694</a>  | bi | 1 | <a href="#">584</a> | bi | 1 | <a href="#">698</a>  |
| 1 | <a href="#">799</a> | 702 | bi  | 1 | <a href="#">1215</a> | bi | 1 | <a href="#">695</a>  | bi | 1 | <a href="#">585</a> | bi | 1 | <a href="#">699</a>  |
| 1 | <a href="#">800</a> | 475 | bi  | 1 | <a href="#">1216</a> | bi | 1 | <a href="#">696</a>  | bi | 1 | <a href="#">586</a> | bi | 1 | <a href="#">701</a>  |
| 1 | <a href="#">801</a> | 304 | bi  | 1 | <a href="#">1217</a> | bi | 1 | <a href="#">697</a>  | bi | 1 | <a href="#">587</a> | bi | 1 | <a href="#">702</a>  |
| 1 | <a href="#">802</a> | 883 | bi  | 1 | <a href="#">1218</a> | bi | 1 | <a href="#">698</a>  | bi | 1 | <a href="#">588</a> | bi | 1 | <a href="#">703</a>  |
| 1 | <a href="#">803</a> | 281 | bi  | 1 | <a href="#">1219</a> | bi | 1 | <a href="#">699</a>  | bi | 1 | <a href="#">589</a> | bi | 1 | <a href="#">704</a>  |
| 1 | <a href="#">804</a> | 200 | bi  | 1 | <a href="#">1220</a> | bi | 1 | <a href="#">700</a>  | bi | 1 | <a href="#">590</a> | bi | 1 | <a href="#">705</a>  |
| 1 | <a href="#">805</a> | 161 | bi  | 1 | <a href="#">1221</a> | bi | 1 | <a href="#">701</a>  | bi | 1 | <a href="#">591</a> | bi | 1 | <a href="#">706</a>  |
| 1 | <a href="#">806</a> | 470 | bi  | 1 | <a href="#">1222</a> | bi | 1 | <a href="#">702</a>  | bi | 1 | <a href="#">592</a> | bi | 1 | <a href="#">707</a>  |
| 1 | <a href="#">807</a> | 311 | bi  | 1 | <a href="#">1223</a> | bi | 1 | <a href="#">703</a>  | bi | 1 | <a href="#">593</a> | bi | 1 | <a href="#">708</a>  |
| 1 | <a href="#">808</a> | 358 | bi  | 1 | <a href="#">1224</a> | bi | 1 | <a href="#">704</a>  | bi | 1 | <a href="#">594</a> | bi | 1 | <a href="#">709</a>  |
| 1 | <a href="#">809</a> | 507 | bi  | 1 | <a href="#">1225</a> | bi | 1 | <a href="#">705</a>  | bi | 1 | <a href="#">595</a> | bi | 1 | <a href="#">710</a>  |
| 1 | <a href="#">810</a> | 528 | bi  | 1 | <a href="#">1226</a> | bi | 1 | <a href="#">706</a>  | bi | 1 | <a href="#">596</a> | bi | 1 | <a href="#">711</a>  |



|   |                     |     |     |   |                      |    |   |                     |    |   |                     |    |   |                      |
|---|---------------------|-----|-----|---|----------------------|----|---|---------------------|----|---|---------------------|----|---|----------------------|
| 1 | <a href="#">811</a> | 421 | bi  | 1 | <a href="#">1227</a> | bi | 1 | <a href="#">708</a> | bi | 1 | <a href="#">597</a> | bi | 1 | <a href="#">712</a>  |
| 1 | <a href="#">812</a> | 689 | bi  | 1 | <a href="#">1228</a> | bi | 1 | <a href="#">709</a> | bi | 1 | <a href="#">598</a> | bi | 1 | <a href="#">714</a>  |
| 1 | <a href="#">813</a> | 283 | bi  | 1 | <a href="#">1229</a> | bi | 1 | <a href="#">710</a> | bi | 1 | <a href="#">599</a> | bi | 1 | <a href="#">715</a>  |
| 1 | <a href="#">814</a> | 104 | bi  | 1 | <a href="#">1230</a> | bi | 1 | <a href="#">711</a> | bi | 1 | <a href="#">600</a> | bi | 1 | <a href="#">716</a>  |
| 1 | <a href="#">815</a> | 385 | bi  | 1 | <a href="#">1231</a> | bi | 1 | <a href="#">712</a> | bi | 1 | <a href="#">601</a> | bi | 1 | <a href="#">717</a>  |
| 1 | <a href="#">816</a> | 241 | bi  | 1 | <a href="#">1232</a> | bi | 1 | <a href="#">713</a> | bi | 1 | <a href="#">602</a> | bi | 1 | <a href="#">718</a>  |
| 1 | <a href="#">817</a> | 488 | bi  | 1 | <a href="#">1233</a> | bi | 1 | <a href="#">714</a> | bi | 1 | <a href="#">603</a> | bi | 1 | <a href="#">719</a>  |
| 1 | <a href="#">818</a> | 363 | bi  | 1 | <a href="#">1235</a> | bi | 1 | <a href="#">716</a> | bi | 1 | <a href="#">605</a> | bi | 1 | <a href="#">721</a>  |
| 1 | <a href="#">819</a> | 382 | bi  | 1 | <a href="#">1236</a> | bi | 1 | <a href="#">717</a> | bi | 1 | <a href="#">606</a> | bi | 1 | <a href="#">722</a>  |
| 1 | <a href="#">820</a> | 126 | bi  | 1 | <a href="#">1237</a> | bi | 1 | <a href="#">718</a> | bi | 1 | <a href="#">607</a> | bi | 1 | <a href="#">723</a>  |
| 1 | <a href="#">821</a> | 80  | uni | 1 | <a href="#">2129</a> | -  |   |                     | -  |   |                     | bi | 1 | <a href="#">2654</a> |
| 1 | <a href="#">822</a> | 96  | bi  | 1 | <a href="#">1238</a> | bi | 1 | <a href="#">719</a> | bi | 1 | <a href="#">608</a> | bi | 1 | <a href="#">724</a>  |
| 1 | <a href="#">823</a> | 849 | bi  | 1 | <a href="#">1239</a> | bi | 1 | <a href="#">720</a> | bi | 1 | <a href="#">609</a> | bi | 1 | <a href="#">725</a>  |
| 1 | <a href="#">824</a> | 348 | bi  | 1 | <a href="#">1240</a> | bi | 1 | <a href="#">721</a> | bi | 1 | <a href="#">610</a> | bi | 1 | <a href="#">726</a>  |
| 1 | <a href="#">825</a> | 369 | bi  | 1 | <a href="#">1241</a> | bi | 1 | <a href="#">722</a> | bi | 1 | <a href="#">611</a> | bi | 1 | <a href="#">727</a>  |
| 1 | <a href="#">826</a> | 332 | bi  | 1 | <a href="#">1242</a> | bi | 1 | <a href="#">723</a> | bi | 1 | <a href="#">612</a> | bi | 1 | <a href="#">728</a>  |
| 1 | <a href="#">827</a> | 315 | bi  | 1 | <a href="#">1243</a> | bi | 1 | <a href="#">724</a> | bi | 1 | <a href="#">613</a> | bi | 1 | <a href="#">729</a>  |
| 1 | <a href="#">828</a> | 212 | bi  | 1 | <a href="#">1244</a> | bi | 1 | <a href="#">725</a> | bi | 1 | <a href="#">614</a> | bi | 1 | <a href="#">730</a>  |
| 1 | <a href="#">829</a> | 358 | bi  | 1 | <a href="#">1245</a> | bi | 1 | <a href="#">726</a> | bi | 1 | <a href="#">615</a> | bi | 1 | <a href="#">731</a>  |
| 1 | <a href="#">830</a> | 557 | bi  | 1 | <a href="#">1246</a> | bi | 1 | <a href="#">727</a> | bi | 1 | <a href="#">616</a> | bi | 1 | <a href="#">732</a>  |
| 1 | <a href="#">831</a> | 117 | bi  | 1 | <a href="#">1247</a> | bi | 1 | <a href="#">728</a> | bi | 1 | <a href="#">617</a> | bi | 1 | <a href="#">733</a>  |
| 1 | <a href="#">832</a> | 314 | bi  | 1 | <a href="#">1248</a> | bi | 1 | <a href="#">729</a> | bi | 1 | <a href="#">618</a> | bi | 1 | <a href="#">734</a>  |
| 1 | <a href="#">833</a> | 351 | bi  | 1 | <a href="#">1249</a> | bi | 1 | <a href="#">730</a> | bi | 1 | <a href="#">619</a> | bi | 1 | <a href="#">735</a>  |
| 1 | <a href="#">834</a> | 353 | bi  | 1 | <a href="#">1250</a> | bi | 1 | <a href="#">731</a> | bi | 1 | <a href="#">620</a> | bi | 1 | <a href="#">736</a>  |
| 1 | <a href="#">835</a> | 319 | bi  | 1 | <a href="#">1251</a> | bi | 1 | <a href="#">732</a> | bi | 1 | <a href="#">621</a> | bi | 1 | <a href="#">737</a>  |
| 1 | <a href="#">836</a> | 357 | bi  | 1 | <a href="#">1252</a> | bi | 1 | <a href="#">733</a> | bi | 1 | <a href="#">622</a> | bi | 1 | <a href="#">738</a>  |
| 1 | <a href="#">837</a> | 174 | bi  | 1 | <a href="#">1253</a> | bi | 1 | <a href="#">734</a> | bi | 1 | <a href="#">623</a> | bi | 1 | <a href="#">739</a>  |
| 1 | <a href="#">838</a> | 67  | bi  | 1 | <a href="#">1254</a> | bi | 1 | <a href="#">735</a> | bi | 1 | <a href="#">624</a> | bi | 1 | <a href="#">740</a>  |
| 1 | <a href="#">839</a> | 120 | bi  | 1 | <a href="#">1255</a> | bi | 1 | <a href="#">736</a> | bi | 1 | <a href="#">625</a> | bi | 1 | <a href="#">741</a>  |
| 1 | <a href="#">840</a> | 117 | bi  | 1 | <a href="#">1256</a> | bi | 1 | <a href="#">737</a> | bi | 1 | <a href="#">626</a> | bi | 1 | <a href="#">742</a>  |
| 1 | <a href="#">841</a> | 120 | bi  | 1 | <a href="#">1257</a> | bi | 1 | <a href="#">738</a> | bi | 1 | <a href="#">627</a> | bi | 1 | <a href="#">743</a>  |
| 1 | <a href="#">842</a> | 145 | bi  | 1 | <a href="#">1258</a> | bi | 1 | <a href="#">739</a> | bi | 1 | <a href="#">628</a> | bi | 1 | <a href="#">744</a>  |
| 1 | <a href="#">843</a> | 172 | bi  | 1 | <a href="#">1259</a> | bi | 1 | <a href="#">740</a> | bi | 1 | <a href="#">629</a> | bi | 1 | <a href="#">745</a>  |
| 1 | <a href="#">844</a> | 392 | bi  | 1 | <a href="#">1260</a> | bi | 1 | <a href="#">741</a> | bi | 1 | <a href="#">630</a> | bi | 1 | <a href="#">746</a>  |
| 1 | <a href="#">845</a> | 343 | bi  | 1 | <a href="#">1261</a> | bi | 1 | <a href="#">742</a> | bi | 1 | <a href="#">631</a> | bi | 1 | <a href="#">747</a>  |
| 1 | <a href="#">846</a> | 277 | bi  | 1 | <a href="#">1262</a> | bi | 1 | <a href="#">743</a> | bi | 1 | <a href="#">632</a> | bi | 1 | <a href="#">748</a>  |
| 1 | <a href="#">847</a> | 291 | bi  | 1 | <a href="#">1263</a> | bi | 1 | <a href="#">744</a> | bi | 1 | <a href="#">633</a> | bi | 1 | <a href="#">749</a>  |
| 1 | <a href="#">848</a> | 75  | bi  | 1 | <a href="#">1264</a> | bi | 1 | <a href="#">745</a> | bi | 1 | <a href="#">634</a> | bi | 1 | <a href="#">750</a>  |
| 1 | <a href="#">849</a> | 225 | bi  | 1 | <a href="#">1265</a> | bi | 1 | <a href="#">746</a> | bi | 1 | <a href="#">635</a> | bi | 1 | <a href="#">751</a>  |
| 1 | <a href="#">850</a> | 342 | bi  | 1 | <a href="#">1266</a> | bi | 1 | <a href="#">747</a> | bi | 1 | <a href="#">636</a> | bi | 1 | <a href="#">752</a>  |
| 1 | <a href="#">851</a> | 288 | bi  | 1 | <a href="#">1267</a> | bi | 1 | <a href="#">748</a> | bi | 1 | <a href="#">637</a> | bi | 1 | <a href="#">753</a>  |
| 1 | <a href="#">852</a> | 464 | bi  | 1 | <a href="#">1268</a> | bi | 1 | <a href="#">749</a> | bi | 1 | <a href="#">638</a> | bi | 1 | <a href="#">754</a>  |
| 1 | <a href="#">853</a> | 670 | bi  | 1 | <a href="#">1269</a> | bi | 1 | <a href="#">750</a> | bi | 1 | <a href="#">639</a> | bi | 1 | <a href="#">755</a>  |
| 1 | <a href="#">854</a> | 92  | bi  | 1 | <a href="#">1270</a> | bi | 1 | <a href="#">751</a> | -  |   |                     | -  |   |                      |
| 1 | <a href="#">855</a> | 202 | bi  | 1 | <a href="#">1271</a> | bi | 1 | <a href="#">752</a> | bi | 1 | <a href="#">640</a> | bi | 1 | <a href="#">757</a>  |
| 1 | <a href="#">856</a> | 733 | bi  | 1 | <a href="#">1272</a> | bi | 1 | <a href="#">753</a> | bi | 1 | <a href="#">641</a> | bi | 1 | <a href="#">758</a>  |
| 1 | <a href="#">857</a> | 257 | bi  | 1 | <a href="#">1273</a> | bi | 1 | <a href="#">754</a> | bi | 1 | <a href="#">642</a> | bi | 1 | <a href="#">759</a>  |
| 1 | <a href="#">858</a> | 191 | bi  | 1 | <a href="#">1274</a> | bi | 1 | <a href="#">755</a> | bi | 1 | <a href="#">643</a> | bi | 1 | <a href="#">760</a>  |
| 1 | <a href="#">859</a> | 296 | bi  | 1 | <a href="#">1275</a> | bi | 1 | <a href="#">756</a> | bi | 1 | <a href="#">644</a> | bi | 1 | <a href="#">761</a>  |
| 1 | <a href="#">860</a> | 206 | bi  | 1 | <a href="#">1276</a> | bi | 1 | <a href="#">757</a> | bi | 1 | <a href="#">645</a> | bi | 1 | <a href="#">762</a>  |
| 1 | <a href="#">861</a> | 368 | bi  | 1 | <a href="#">1277</a> | bi | 1 | <a href="#">758</a> | bi | 1 | <a href="#">646</a> | bi | 1 | <a href="#">763</a>  |
| 1 | <a href="#">862</a> | 141 | bi  | 1 | <a href="#">1278</a> | bi | 1 | <a href="#">759</a> | bi | 1 | <a href="#">647</a> | bi | 1 | <a href="#">764</a>  |
| 1 | <a href="#">863</a> | 180 | bi  | 1 | <a href="#">1279</a> | bi | 1 | <a href="#">760</a> | bi | 1 | <a href="#">648</a> | bi | 1 | <a href="#">765</a>  |
| 1 | <a href="#">864</a> | 589 | bi  | 1 | <a href="#">1280</a> | bi | 1 | <a href="#">761</a> | bi | 1 | <a href="#">649</a> | bi | 1 | <a href="#">766</a>  |
| 1 | <a href="#">865</a> | 576 | bi  | 1 | <a href="#">1281</a> | bi | 1 | <a href="#">762</a> | bi | 1 | <a href="#">650</a> | bi | 1 | <a href="#">767</a>  |
| 1 | <a href="#">866</a> | 262 | bi  | 1 | <a href="#">1282</a> | bi | 1 | <a href="#">763</a> | bi | 1 | <a href="#">651</a> | bi | 1 | <a href="#">768</a>  |
| 1 | <a href="#">867</a> | 403 | bi  | 1 | <a href="#">1283</a> | bi | 1 | <a href="#">764</a> | bi | 1 | <a href="#">652</a> | bi | 1 | <a href="#">769</a>  |

|   |                     |     |     |   |                      |     |   |                     |     |   |                     |     |   |                     |
|---|---------------------|-----|-----|---|----------------------|-----|---|---------------------|-----|---|---------------------|-----|---|---------------------|
| 1 | <a href="#">868</a> | 188 | bi  | 1 | <a href="#">1284</a> | bi  | 1 | <a href="#">765</a> | bi  | 1 | <a href="#">653</a> | bi  | 1 | <a href="#">770</a> |
| 1 | <a href="#">869</a> | 175 | bi  | 1 | <a href="#">1285</a> | bi  | 1 | <a href="#">766</a> | bi  | 1 | <a href="#">654</a> | bi  | 1 | <a href="#">771</a> |
| 1 | <a href="#">870</a> | 290 | bi  | 1 | <a href="#">1286</a> | bi  | 1 | <a href="#">767</a> | bi  | 1 | <a href="#">655</a> | bi  | 1 | <a href="#">772</a> |
| 1 | <a href="#">871</a> | 227 | bi  | 1 | <a href="#">1287</a> | bi  | 1 | <a href="#">768</a> | bi  | 1 | <a href="#">656</a> | bi  | 1 | <a href="#">773</a> |
| 1 | <a href="#">872</a> | 328 | bi  | 1 | <a href="#">1288</a> | bi  | 1 | <a href="#">769</a> | bi  | 1 | <a href="#">657</a> | bi  | 1 | <a href="#">774</a> |
| 1 | <a href="#">873</a> | 160 | bi  | 1 | <a href="#">1289</a> | bi  | 1 | <a href="#">770</a> | bi  | 1 | <a href="#">658</a> | bi  | 1 | <a href="#">775</a> |
| 1 | <a href="#">874</a> | 174 | bi  | 1 | <a href="#">1290</a> | bi  | 1 | <a href="#">771</a> | bi  | 1 | <a href="#">659</a> | bi  | 1 | <a href="#">776</a> |
| 1 | <a href="#">875</a> | 70  | bi  | 1 | <a href="#">1291</a> | bi  | 1 | <a href="#">772</a> | bi  | 1 | <a href="#">660</a> | bi  | 1 | <a href="#">777</a> |
| 1 | <a href="#">876</a> | 337 | bi  | 1 | <a href="#">1292</a> | bi  | 1 | <a href="#">773</a> | bi  | 1 | <a href="#">661</a> | bi  | 1 | <a href="#">778</a> |
| 1 | <a href="#">877</a> | 336 | bi  | 1 | <a href="#">1293</a> | bi  | 1 | <a href="#">774</a> | bi  | 1 | <a href="#">662</a> | bi  | 1 | <a href="#">779</a> |
| 1 | <a href="#">878</a> | 223 | bi  | 1 | <a href="#">1294</a> | bi  | 1 | <a href="#">775</a> | bi  | 1 | <a href="#">663</a> | bi  | 1 | <a href="#">780</a> |
| 1 | <a href="#">879</a> | 765 | bi  | 1 | <a href="#">1295</a> | bi  | 1 | <a href="#">776</a> | bi  | 1 | <a href="#">664</a> | bi  | 1 | <a href="#">781</a> |
| 1 | <a href="#">880</a> | 723 | bi  | 1 | <a href="#">1296</a> | bi  | 1 | <a href="#">777</a> | bi  | 1 | <a href="#">665</a> | bi  | 1 | <a href="#">782</a> |
| 1 | <a href="#">881</a> | 45  | -   |   |                      | -   |   |                     | uni | 1 | <a href="#">225</a> | -   |   |                     |
| 1 | <a href="#">882</a> | 275 | bi  | 1 | <a href="#">1297</a> | bi  | 1 | <a href="#">778</a> | bi  | 1 | <a href="#">666</a> | bi  | 1 | <a href="#">783</a> |
| 1 | <a href="#">883</a> | 272 | bi  | 1 | <a href="#">1298</a> | bi  | 1 | <a href="#">779</a> | bi  | 1 | <a href="#">667</a> | bi  | 1 | <a href="#">784</a> |
| 1 | <a href="#">884</a> | 321 | bi  | 1 | <a href="#">1299</a> | bi  | 1 | <a href="#">780</a> | bi  | 1 | <a href="#">668</a> | bi  | 1 | <a href="#">785</a> |
| 1 | <a href="#">885</a> | 100 | bi  | 1 | <a href="#">1300</a> | bi  | 1 | <a href="#">781</a> | bi  | 1 | <a href="#">669</a> | bi  | 1 | <a href="#">786</a> |
| 1 | <a href="#">886</a> | 97  | bi  | 1 | <a href="#">1301</a> | bi  | 1 | <a href="#">782</a> | bi  | 1 | <a href="#">670</a> | bi  | 1 | <a href="#">787</a> |
| 1 | <a href="#">887</a> | 238 | -   |   |                      | -   |   |                     | -   |   |                     | -   |   |                     |
| 1 | <a href="#">888</a> | 259 | bi  | 1 | <a href="#">1302</a> | bi  | 1 | <a href="#">783</a> | bi  | 1 | <a href="#">671</a> | bi  | 1 | <a href="#">788</a> |
| 1 | <a href="#">889</a> | 631 | uni | 1 | <a href="#">765</a>  | uni | 1 | <a href="#">403</a> | uni | 1 | <a href="#">347</a> | uni | 1 | <a href="#">349</a> |
| 1 | <a href="#">890</a> | 103 | bi  | 1 | <a href="#">1311</a> | bi  | 1 | <a href="#">792</a> | bi  | 1 | <a href="#">683</a> | bi  | 1 | <a href="#">795</a> |
| 1 | <a href="#">891</a> | 115 | bi  | 1 | <a href="#">1312</a> | bi  | 1 | <a href="#">793</a> | bi  | 1 | <a href="#">684</a> | bi  | 1 | <a href="#">796</a> |
| 1 | <a href="#">892</a> | 96  | bi  | 1 | <a href="#">1313</a> | bi  | 1 | <a href="#">794</a> | bi  | 1 | <a href="#">685</a> | bi  | 1 | <a href="#">797</a> |
| 1 | <a href="#">893</a> | 151 | bi  | 1 | <a href="#">1368</a> | bi  | 1 | <a href="#">795</a> | bi  | 1 | <a href="#">686</a> | bi  | 1 | <a href="#">798</a> |
| 1 | <a href="#">894</a> | 272 | bi  | 1 | <a href="#">1369</a> | bi  | 1 | <a href="#">796</a> | bi  | 1 | <a href="#">687</a> | bi  | 1 | <a href="#">799</a> |
| 1 | <a href="#">895</a> | 355 | bi  | 1 | <a href="#">1370</a> | bi  | 1 | <a href="#">797</a> | bi  | 1 | <a href="#">688</a> | bi  | 1 | <a href="#">800</a> |
| 1 | <a href="#">896</a> | 107 | bi  | 1 | <a href="#">1371</a> | bi  | 1 | <a href="#">798</a> | bi  | 1 | <a href="#">689</a> | bi  | 1 | <a href="#">801</a> |
| 1 | <a href="#">897</a> | 144 | bi  | 1 | <a href="#">1372</a> | bi  | 1 | <a href="#">799</a> | bi  | 1 | <a href="#">690</a> | bi  | 1 | <a href="#">802</a> |
| 1 | <a href="#">898</a> | 155 | bi  | 1 | <a href="#">1373</a> | bi  | 1 | <a href="#">800</a> | bi  | 1 | <a href="#">691</a> | bi  | 1 | <a href="#">803</a> |
| 1 | <a href="#">899</a> | 282 | bi  | 1 | <a href="#">1374</a> | bi  | 1 | <a href="#">801</a> | bi  | 1 | <a href="#">692</a> | bi  | 1 | <a href="#">804</a> |
| 1 | <a href="#">900</a> | 449 | bi  | 1 | <a href="#">1375</a> | bi  | 1 | <a href="#">802</a> | bi  | 1 | <a href="#">693</a> | bi  | 1 | <a href="#">805</a> |
| 1 | <a href="#">901</a> | 77  | bi  | 1 | <a href="#">1376</a> | bi  | 1 | <a href="#">803</a> | bi  | 1 | <a href="#">694</a> | bi  | 1 | <a href="#">806</a> |
| 1 | <a href="#">902</a> | 294 | bi  | 1 | <a href="#">1377</a> | bi  | 1 | <a href="#">804</a> | bi  | 1 | <a href="#">695</a> | bi  | 1 | <a href="#">807</a> |
| 1 | <a href="#">903</a> | 272 | bi  | 1 | <a href="#">1378</a> | bi  | 1 | <a href="#">805</a> | bi  | 1 | <a href="#">696</a> | bi  | 1 | <a href="#">808</a> |
| 1 | <a href="#">904</a> | 150 | bi  | 1 | <a href="#">1379</a> | bi  | 1 | <a href="#">806</a> | bi  | 1 | <a href="#">697</a> | bi  | 1 | <a href="#">811</a> |
| 1 | <a href="#">905</a> | 558 | bi  | 1 | <a href="#">1380</a> | bi  | 1 | <a href="#">807</a> | bi  | 1 | <a href="#">698</a> | bi  | 1 | <a href="#">812</a> |
| 1 | <a href="#">906</a> | 57  | bi  | 1 | <a href="#">1381</a> | bi  | 1 | <a href="#">808</a> | bi  | 1 | <a href="#">699</a> | bi  | 1 | <a href="#">813</a> |
| 1 | <a href="#">907</a> | 322 | bi  | 1 | <a href="#">1382</a> | bi  | 1 | <a href="#">809</a> | bi  | 1 | <a href="#">700</a> | bi  | 1 | <a href="#">814</a> |
| 1 | <a href="#">908</a> | 131 | -   |   |                      | -   |   |                     | bi  | 1 | <a href="#">701</a> | -   |   |                     |
| 1 | <a href="#">909</a> | 144 | bi  | 1 | <a href="#">1383</a> | bi  | 1 | <a href="#">810</a> | bi  | 1 | <a href="#">702</a> | bi  | 1 | <a href="#">815</a> |
| 1 | <a href="#">910</a> | 320 | bi  | 1 | <a href="#">1384</a> | bi  | 1 | <a href="#">811</a> | bi  | 1 | <a href="#">703</a> | bi  | 1 | <a href="#">816</a> |
| 1 | <a href="#">911</a> | 136 | bi  | 1 | <a href="#">1385</a> | bi  | 1 | <a href="#">812</a> | bi  | 1 | <a href="#">704</a> | bi  | 1 | <a href="#">817</a> |
| 1 | <a href="#">912</a> | 743 | bi  | 1 | <a href="#">1386</a> | bi  | 1 | <a href="#">813</a> | bi  | 1 | <a href="#">705</a> | bi  | 1 | <a href="#">818</a> |
| 1 | <a href="#">913</a> | 322 | bi  | 1 | <a href="#">1387</a> | bi  | 1 | <a href="#">814</a> | bi  | 1 | <a href="#">706</a> | bi  | 1 | <a href="#">819</a> |
| 1 | <a href="#">914</a> | 457 | bi  | 1 | <a href="#">1388</a> | bi  | 1 | <a href="#">815</a> | bi  | 1 | <a href="#">707</a> | bi  | 1 | <a href="#">820</a> |
| 1 | <a href="#">915</a> | 364 | bi  | 1 | <a href="#">1389</a> | bi  | 1 | <a href="#">816</a> | bi  | 1 | <a href="#">708</a> | bi  | 1 | <a href="#">821</a> |
| 1 | <a href="#">916</a> | 375 | bi  | 1 | <a href="#">1390</a> | bi  | 1 | <a href="#">817</a> | bi  | 1 | <a href="#">709</a> | bi  | 1 | <a href="#">822</a> |
| 1 | <a href="#">917</a> | 441 | bi  | 1 | <a href="#">1391</a> | bi  | 1 | <a href="#">818</a> | bi  | 1 | <a href="#">710</a> | bi  | 1 | <a href="#">823</a> |
| 1 | <a href="#">918</a> | 411 | bi  | 1 | <a href="#">1392</a> | bi  | 1 | <a href="#">819</a> | bi  | 1 | <a href="#">711</a> | bi  | 1 | <a href="#">824</a> |
| 1 | <a href="#">919</a> | 226 | bi  | 1 | <a href="#">1393</a> | bi  | 1 | <a href="#">820</a> | bi  | 1 | <a href="#">712</a> | bi  | 1 | <a href="#">825</a> |
| 1 | <a href="#">920</a> | 215 | bi  | 1 | <a href="#">1394</a> | bi  | 1 | <a href="#">821</a> | bi  | 1 | <a href="#">713</a> | bi  | 1 | <a href="#">826</a> |
| 1 | <a href="#">921</a> | 70  | bi  | 1 | <a href="#">1395</a> | bi  | 1 | <a href="#">822</a> | bi  | 1 | <a href="#">714</a> | bi  | 1 | <a href="#">827</a> |
| 1 | <a href="#">922</a> | 261 | bi  | 1 | <a href="#">1396</a> | bi  | 1 | <a href="#">823</a> | bi  | 1 | <a href="#">715</a> | bi  | 1 | <a href="#">828</a> |
| 1 | <a href="#">923</a> | 234 | bi  | 1 | <a href="#">1397</a> | bi  | 1 | <a href="#">824</a> | bi  | 1 | <a href="#">716</a> | bi  | 1 | <a href="#">829</a> |
| 1 | <a href="#">924</a> | 927 | bi  | 1 | <a href="#">1398</a> | bi  | 1 | <a href="#">825</a> | bi  | 1 | <a href="#">717</a> | bi  | 1 | <a href="#">830</a> |

|   |                      |      |     |   |                      |     |   |                      |    |   |                     |    |   |                     |
|---|----------------------|------|-----|---|----------------------|-----|---|----------------------|----|---|---------------------|----|---|---------------------|
| 1 | <a href="#">925</a>  | 508  | bi  | 1 | <a href="#">1399</a> | bi  | 1 | <a href="#">826</a>  | bi | 1 | <a href="#">718</a> | bi | 1 | <a href="#">831</a> |
| 1 | <a href="#">926</a>  | 223  | bi  | 1 | <a href="#">1400</a> | bi  | 1 | <a href="#">827</a>  | bi | 1 | <a href="#">719</a> | bi | 1 | <a href="#">832</a> |
| 1 | <a href="#">927</a>  | 123  | bi  | 1 | <a href="#">1401</a> | bi  | 1 | <a href="#">828</a>  | bi | 1 | <a href="#">720</a> | bi | 1 | <a href="#">833</a> |
| 1 | <a href="#">3296</a> | 194  | bi  | 1 | <a href="#">1402</a> | bi  | 1 | <a href="#">829</a>  | bi | 1 | <a href="#">721</a> | bi | 1 | <a href="#">834</a> |
| 1 | <a href="#">928</a>  | 333  | bi  | 1 | <a href="#">1403</a> | bi  | 1 | <a href="#">830</a>  | bi | 1 | <a href="#">722</a> | bi | 1 | <a href="#">835</a> |
| 1 | <a href="#">929</a>  | 434  | bi  | 1 | <a href="#">1404</a> | bi  | 1 | <a href="#">831</a>  | bi | 1 | <a href="#">723</a> | bi | 1 | <a href="#">836</a> |
| 1 | <a href="#">930</a>  | 902  | bi  | 1 | <a href="#">1405</a> | bi  | 1 | <a href="#">832</a>  | bi | 1 | <a href="#">724</a> | bi | 1 | <a href="#">837</a> |
| 1 | <a href="#">931</a>  | 106  | bi  | 1 | <a href="#">1406</a> | bi  | 1 | <a href="#">833</a>  | bi | 1 | <a href="#">725</a> | bi | 1 | <a href="#">839</a> |
| 1 | <a href="#">932</a>  | 488  | bi  | 1 | <a href="#">1407</a> | bi  | 1 | <a href="#">834</a>  | bi | 1 | <a href="#">726</a> | bi | 1 | <a href="#">840</a> |
| 1 | <a href="#">933</a>  | 73   | bi  | 1 | <a href="#">1408</a> | bi  | 1 | <a href="#">835</a>  | bi | 1 | <a href="#">727</a> | bi | 1 | <a href="#">841</a> |
| 1 | <a href="#">934</a>  | 65   | bi  | 1 | <a href="#">1409</a> | bi  | 1 | <a href="#">836</a>  | bi | 1 | <a href="#">728</a> | bi | 1 | <a href="#">842</a> |
| 1 | <a href="#">935</a>  | 137  | bi  | 1 | <a href="#">1410</a> | bi  | 1 | <a href="#">837</a>  | bi | 1 | <a href="#">729</a> | bi | 1 | <a href="#">843</a> |
| 1 | <a href="#">936</a>  | 109  | bi  | 1 | <a href="#">1411</a> | bi  | 1 | <a href="#">838</a>  | bi | 1 | <a href="#">730</a> | bi | 1 | <a href="#">844</a> |
| 1 | <a href="#">937</a>  | 107  | bi  | 1 | <a href="#">1412</a> | bi  | 1 | <a href="#">839</a>  | bi | 1 | <a href="#">731</a> | bi | 1 | <a href="#">845</a> |
| 1 | <a href="#">938</a>  | 426  | bi  | 1 | <a href="#">1413</a> | bi  | 1 | <a href="#">840</a>  | bi | 1 | <a href="#">732</a> | bi | 1 | <a href="#">846</a> |
| 1 | <a href="#">939</a>  | 465  | bi  | 1 | <a href="#">1414</a> | bi  | 1 | <a href="#">841</a>  | bi | 1 | <a href="#">733</a> | bi | 1 | <a href="#">847</a> |
| 1 | <a href="#">940</a>  | 398  | bi  | 1 | <a href="#">1415</a> | bi  | 1 | <a href="#">842</a>  | bi | 1 | <a href="#">734</a> | bi | 1 | <a href="#">848</a> |
| 1 | <a href="#">941</a>  | 40   | bi  | 1 | <a href="#">1416</a> | bi  | 1 | <a href="#">843</a>  | bi | 1 | <a href="#">735</a> | bi | 1 | <a href="#">849</a> |
| 1 | <a href="#">942</a>  | 111  | bi  | 1 | <a href="#">1417</a> | bi  | 1 | <a href="#">844</a>  | bi | 1 | <a href="#">736</a> | bi | 1 | <a href="#">850</a> |
| 1 | <a href="#">943</a>  | 882  | bi  | 1 | <a href="#">1418</a> | bi  | 1 | <a href="#">845</a>  | bi | 1 | <a href="#">737</a> | bi | 1 | <a href="#">851</a> |
| 1 | <a href="#">944</a>  | 210  | bi  | 1 | <a href="#">1419</a> | bi  | 1 | <a href="#">846</a>  | bi | 1 | <a href="#">738</a> | bi | 1 | <a href="#">852</a> |
| 1 | <a href="#">945</a>  | 271  | bi  | 1 | <a href="#">1420</a> | bi  | 1 | <a href="#">847</a>  | bi | 1 | <a href="#">739</a> | bi | 1 | <a href="#">853</a> |
| 1 | <a href="#">3297</a> | 844  | bi  | 1 | <a href="#">1421</a> | bi  | 1 | <a href="#">848</a>  | bi | 1 | <a href="#">740</a> | bi | 1 | <a href="#">854</a> |
| 1 | <a href="#">946</a>  | 245  | bi  | 1 | <a href="#">1422</a> | bi  | 1 | <a href="#">849</a>  | bi | 1 | <a href="#">741</a> | bi | 1 | <a href="#">855</a> |
| 1 | <a href="#">947</a>  | 195  | bi  | 1 | <a href="#">1423</a> | bi  | 1 | <a href="#">850</a>  | bi | 1 | <a href="#">742</a> | bi | 1 | <a href="#">856</a> |
| 1 | <a href="#">948</a>  | 352  | bi  | 1 | <a href="#">1424</a> | bi  | 1 | <a href="#">851</a>  | bi | 1 | <a href="#">743</a> | bi | 1 | <a href="#">857</a> |
| 1 | <a href="#">949</a>  | 219  | uni | 1 | <a href="#">2791</a> | uni | 1 | <a href="#">2335</a> | bi | 1 | <a href="#">744</a> | bi | 1 | <a href="#">858</a> |
| 1 | <a href="#">950</a>  | 746  | bi  | 1 | <a href="#">1425</a> | bi  | 1 | <a href="#">852</a>  | bi | 1 | <a href="#">745</a> | bi | 1 | <a href="#">860</a> |
| 1 | <a href="#">951</a>  | 730  | bi  | 1 | <a href="#">1426</a> | bi  | 1 | <a href="#">853</a>  | bi | 1 | <a href="#">746</a> | bi | 1 | <a href="#">861</a> |
| 1 | <a href="#">952</a>  | 310  | bi  | 1 | <a href="#">1427</a> | bi  | 1 | <a href="#">854</a>  | bi | 1 | <a href="#">747</a> | bi | 1 | <a href="#">862</a> |
| 1 | <a href="#">953</a>  | 218  | bi  | 1 | <a href="#">1432</a> | bi  | 1 | <a href="#">855</a>  | bi | 1 | <a href="#">748</a> | bi | 1 | <a href="#">863</a> |
| 1 | <a href="#">954</a>  | 134  | bi  | 1 | <a href="#">1433</a> | bi  | 1 | <a href="#">856</a>  | bi | 1 | <a href="#">749</a> | bi | 1 | <a href="#">864</a> |
| 1 | <a href="#">955</a>  | 537  | bi  | 1 | <a href="#">1434</a> | bi  | 1 | <a href="#">857</a>  | bi | 1 | <a href="#">750</a> | bi | 1 | <a href="#">865</a> |
| 1 | <a href="#">956</a>  | 362  | bi  | 1 | <a href="#">1435</a> | bi  | 1 | <a href="#">858</a>  | bi | 1 | <a href="#">751</a> | bi | 1 | <a href="#">866</a> |
| 1 | <a href="#">957</a>  | 268  | bi  | 1 | <a href="#">1436</a> | bi  | 1 | <a href="#">859</a>  | bi | 1 | <a href="#">752</a> | bi | 1 | <a href="#">867</a> |
| 1 | <a href="#">958</a>  | 210  | bi  | 1 | <a href="#">1438</a> | bi  | 1 | <a href="#">861</a>  | bi | 1 | <a href="#">753</a> | bi | 1 | <a href="#">868</a> |
| 1 | <a href="#">959</a>  | 469  | bi  | 1 | <a href="#">1439</a> | bi  | 1 | <a href="#">862</a>  | bi | 1 | <a href="#">754</a> | bi | 1 | <a href="#">869</a> |
| 1 | <a href="#">960</a>  | 399  | bi  | 1 | <a href="#">1440</a> | bi  | 1 | <a href="#">863</a>  | bi | 1 | <a href="#">755</a> | bi | 1 | <a href="#">870</a> |
| 1 | <a href="#">961</a>  | 62   | bi  | 1 | <a href="#">1441</a> | bi  | 1 | <a href="#">864</a>  | bi | 1 | <a href="#">756</a> | bi | 1 | <a href="#">871</a> |
| 1 | <a href="#">962</a>  | 1110 | bi  | 1 | <a href="#">1442</a> | bi  | 1 | <a href="#">865</a>  | bi | 1 | <a href="#">757</a> | bi | 1 | <a href="#">872</a> |
| 1 | <a href="#">963</a>  | 321  | bi  | 1 | <a href="#">1443</a> | bi  | 1 | <a href="#">866</a>  | bi | 1 | <a href="#">758</a> | bi | 1 | <a href="#">873</a> |
| 1 | <a href="#">964</a>  | 586  | bi  | 1 | <a href="#">1444</a> | bi  | 1 | <a href="#">867</a>  | bi | 1 | <a href="#">759</a> | bi | 1 | <a href="#">874</a> |
| 1 | <a href="#">965</a>  | 190  | bi  | 1 | <a href="#">1445</a> | bi  | 1 | <a href="#">868</a>  | bi | 1 | <a href="#">760</a> | bi | 1 | <a href="#">875</a> |
| 1 | <a href="#">966</a>  | 60   | bi  | 1 | <a href="#">1446</a> | bi  | 1 | <a href="#">869</a>  | bi | 1 | <a href="#">761</a> | bi | 1 | <a href="#">876</a> |
| 1 | <a href="#">967</a>  | 474  | bi  | 1 | <a href="#">1447</a> | bi  | 1 | <a href="#">870</a>  | bi | 1 | <a href="#">762</a> | bi | 1 | <a href="#">877</a> |
| 1 | <a href="#">968</a>  | 229  | bi  | 1 | <a href="#">1448</a> | bi  | 1 | <a href="#">871</a>  | bi | 1 | <a href="#">763</a> | bi | 1 | <a href="#">878</a> |
| 1 | <a href="#">969</a>  | 503  | bi  | 1 | <a href="#">1449</a> | bi  | 1 | <a href="#">872</a>  | bi | 1 | <a href="#">764</a> | bi | 1 | <a href="#">879</a> |
| 1 | <a href="#">970</a>  | 55   | -   |   |                      | -   |   |                      | -  |   |                     | -  |   |                     |
| 1 | <a href="#">971</a>  | 270  | bi  | 1 | <a href="#">1451</a> | bi  | 1 | <a href="#">874</a>  | bi | 1 | <a href="#">808</a> | bi | 1 | <a href="#">880</a> |
| 1 | <a href="#">972</a>  | 586  | bi  | 1 | <a href="#">1452</a> | bi  | 1 | <a href="#">875</a>  | bi | 1 | <a href="#">809</a> | bi | 1 | <a href="#">881</a> |
| 1 | <a href="#">973</a>  | 171  | bi  | 1 | <a href="#">1454</a> | bi  | 1 | <a href="#">877</a>  | bi | 1 | <a href="#">810</a> | bi | 1 | <a href="#">882</a> |
| 1 | <a href="#">974</a>  | 32   | -   |   |                      | -   |   |                      | -  |   |                     | -  |   |                     |
| 1 | <a href="#">975</a>  | 533  | bi  | 1 | <a href="#">1455</a> | bi  | 1 | <a href="#">878</a>  | bi | 1 | <a href="#">811</a> | bi | 1 | <a href="#">883</a> |
| 1 | <a href="#">976</a>  | 142  | bi  | 1 | <a href="#">1456</a> | bi  | 1 | <a href="#">879</a>  | bi | 1 | <a href="#">812</a> | bi | 1 | <a href="#">884</a> |
| 1 | <a href="#">977</a>  | 557  | bi  | 1 | <a href="#">1457</a> | bi  | 1 | <a href="#">880</a>  | bi | 1 | <a href="#">813</a> | bi | 1 | <a href="#">885</a> |
| 1 | <a href="#">978</a>  | 554  | bi  | 1 | <a href="#">1458</a> | bi  | 1 | <a href="#">881</a>  | bi | 1 | <a href="#">814</a> | bi | 1 | <a href="#">887</a> |
| 1 | <a href="#">979</a>  | 408  | bi  | 1 | <a href="#">1459</a> | bi  | 1 | <a href="#">882</a>  | bi | 1 | <a href="#">815</a> | bi | 1 | <a href="#">888</a> |

|   |                      |      |    |   |                      |    |   |                     |    |   |                     |    |   |                     |
|---|----------------------|------|----|---|----------------------|----|---|---------------------|----|---|---------------------|----|---|---------------------|
| 1 | <a href="#">980</a>  | 406  | bi | 1 | <a href="#">1460</a> | bi | 1 | <a href="#">883</a> | bi | 1 | <a href="#">816</a> | bi | 1 | <a href="#">889</a> |
| 1 | <a href="#">981</a>  | 160  | bi | 1 | <a href="#">1461</a> | bi | 1 | <a href="#">884</a> | bi | 1 | <a href="#">817</a> | bi | 1 | <a href="#">890</a> |
| 1 | <a href="#">3298</a> | 124  | bi | 1 | <a href="#">1462</a> | bi | 1 | <a href="#">885</a> | bi | 1 | <a href="#">818</a> | bi | 1 | <a href="#">891</a> |
| 1 | <a href="#">982</a>  | 36   | -  |   |                      | -  |   |                     | -  |   |                     | -  |   |                     |
| 1 | <a href="#">983</a>  | 213  | bi | 1 | <a href="#">1463</a> | bi | 1 | <a href="#">886</a> | bi | 1 | <a href="#">819</a> | bi | 1 | <a href="#">892</a> |
| 1 | <a href="#">984</a>  | 68   | bi | 1 | <a href="#">1464</a> | bi | 1 | <a href="#">887</a> | bi | 1 | <a href="#">820</a> | bi | 1 | <a href="#">893</a> |
| 1 | <a href="#">985</a>  | 346  | bi | 1 | <a href="#">1465</a> | bi | 1 | <a href="#">888</a> | bi | 1 | <a href="#">821</a> | bi | 1 | <a href="#">894</a> |
| 1 | <a href="#">986</a>  | 388  | bi | 1 | <a href="#">1466</a> | bi | 1 | <a href="#">889</a> | bi | 1 | <a href="#">822</a> | bi | 1 | <a href="#">895</a> |
| 1 | <a href="#">987</a>  | 330  | bi | 1 | <a href="#">1467</a> | bi | 1 | <a href="#">890</a> | bi | 1 | <a href="#">823</a> | bi | 1 | <a href="#">896</a> |
| 1 | <a href="#">988</a>  | 498  | bi | 1 | <a href="#">1468</a> | bi | 1 | <a href="#">891</a> | bi | 1 | <a href="#">824</a> | bi | 1 | <a href="#">897</a> |
| 1 | <a href="#">989</a>  | 335  | bi | 1 | <a href="#">1469</a> | bi | 1 | <a href="#">892</a> | bi | 1 | <a href="#">825</a> | bi | 1 | <a href="#">898</a> |
| 1 | <a href="#">990</a>  | 165  | bi | 1 | <a href="#">1470</a> | bi | 1 | <a href="#">893</a> | bi | 1 | <a href="#">826</a> | bi | 1 | <a href="#">899</a> |
| 1 | <a href="#">991</a>  | 91   | bi | 1 | <a href="#">1471</a> | bi | 1 | <a href="#">894</a> | bi | 1 | <a href="#">827</a> | bi | 1 | <a href="#">900</a> |
| 1 | <a href="#">992</a>  | 169  | bi | 1 | <a href="#">1472</a> | bi | 1 | <a href="#">895</a> | bi | 1 | <a href="#">828</a> | bi | 1 | <a href="#">901</a> |
| 1 | <a href="#">993</a>  | 262  | -  |   |                      | -  |   |                     | bi | 1 | <a href="#">829</a> | bi | 1 | <a href="#">902</a> |
| 1 | <a href="#">994</a>  | 150  | bi | 1 | <a href="#">1473</a> | bi | 1 | <a href="#">896</a> | bi | 1 | <a href="#">830</a> | bi | 1 | <a href="#">903</a> |
| 1 | <a href="#">995</a>  | 385  | bi | 1 | <a href="#">1474</a> | bi | 1 | <a href="#">897</a> | bi | 1 | <a href="#">831</a> | bi | 1 | <a href="#">904</a> |
| 1 | <a href="#">996</a>  | 439  | bi | 1 | <a href="#">1476</a> | bi | 1 | <a href="#">898</a> | bi | 1 | <a href="#">832</a> | bi | 1 | <a href="#">905</a> |
| 1 | <a href="#">997</a>  | 130  | bi | 1 | <a href="#">1477</a> | bi | 1 | <a href="#">899</a> | bi | 1 | <a href="#">833</a> | bi | 1 | <a href="#">906</a> |
| 1 | <a href="#">998</a>  | 61   | bi | 1 | <a href="#">1478</a> | bi | 1 | <a href="#">900</a> | bi | 1 | <a href="#">834</a> | bi | 1 | <a href="#">907</a> |
| 1 | <a href="#">999</a>  | 102  | bi | 1 | <a href="#">1479</a> | bi | 1 | <a href="#">901</a> | bi | 1 | <a href="#">835</a> | bi | 1 | <a href="#">908</a> |
| 1 | <a href="#">1000</a> | 144  | bi | 1 | <a href="#">1480</a> | bi | 1 | <a href="#">902</a> | bi | 1 | <a href="#">836</a> | bi | 1 | <a href="#">909</a> |
| 1 | <a href="#">1001</a> | 81   | bi | 1 | <a href="#">1481</a> | bi | 1 | <a href="#">903</a> | bi | 1 | <a href="#">837</a> | bi | 1 | <a href="#">910</a> |
| 1 | <a href="#">1002</a> | 149  | bi | 1 | <a href="#">1482</a> | bi | 1 | <a href="#">904</a> | bi | 1 | <a href="#">838</a> | bi | 1 | <a href="#">911</a> |
| 1 | <a href="#">1003</a> | 238  | bi | 1 | <a href="#">1483</a> | bi | 1 | <a href="#">906</a> | bi | 1 | <a href="#">839</a> | bi | 1 | <a href="#">913</a> |
| 1 | <a href="#">1004</a> | 132  | bi | 1 | <a href="#">1484</a> | bi | 1 | <a href="#">907</a> | bi | 1 | <a href="#">840</a> | bi | 1 | <a href="#">914</a> |
| 1 | <a href="#">1005</a> | 474  | bi | 1 | <a href="#">1485</a> | bi | 1 | <a href="#">908</a> | bi | 1 | <a href="#">841</a> | bi | 1 | <a href="#">915</a> |
| 1 | <a href="#">1006</a> | 1104 | bi | 1 | <a href="#">1486</a> | bi | 1 | <a href="#">909</a> | bi | 1 | <a href="#">842</a> | bi | 1 | <a href="#">916</a> |
| 1 | <a href="#">1007</a> | 477  | bi | 1 | <a href="#">1487</a> | bi | 1 | <a href="#">910</a> | bi | 1 | <a href="#">843</a> | bi | 1 | <a href="#">917</a> |
| 1 | <a href="#">1008</a> | 626  | bi | 1 | <a href="#">1488</a> | bi | 1 | <a href="#">911</a> | bi | 1 | <a href="#">844</a> | bi | 1 | <a href="#">919</a> |
| 1 | <a href="#">1009</a> | 285  | bi | 1 | <a href="#">1489</a> | bi | 1 | <a href="#">912</a> | bi | 1 | <a href="#">845</a> | bi | 1 | <a href="#">920</a> |
| 1 | <a href="#">1010</a> | 98   | -  |   |                      | bi | 1 | <a href="#">913</a> | -  |   |                     | bi | 1 | <a href="#">922</a> |
| 1 | <a href="#">1011</a> | 68   | bi | 1 | <a href="#">1490</a> | bi | 1 | <a href="#">914</a> | bi | 1 | <a href="#">846</a> | bi | 1 | <a href="#">923</a> |
| 1 | <a href="#">1012</a> | 171  | bi | 1 | <a href="#">1491</a> | bi | 1 | <a href="#">915</a> | bi | 1 | <a href="#">847</a> | bi | 1 | <a href="#">924</a> |
| 1 | <a href="#">1013</a> | 102  | bi | 1 | <a href="#">1493</a> | bi | 1 | <a href="#">921</a> | bi | 1 | <a href="#">848</a> | bi | 1 | <a href="#">926</a> |
| 1 | <a href="#">1014</a> | 675  | bi | 1 | <a href="#">1494</a> | bi | 1 | <a href="#">922</a> | bi | 1 | <a href="#">849</a> | bi | 1 | <a href="#">927</a> |
| 1 | <a href="#">1015</a> | 532  | bi | 1 | <a href="#">1495</a> | bi | 1 | <a href="#">923</a> | bi | 1 | <a href="#">850</a> | bi | 1 | <a href="#">928</a> |
| 1 | <a href="#">1016</a> | 245  | bi | 1 | <a href="#">1496</a> | bi | 1 | <a href="#">924</a> | bi | 1 | <a href="#">851</a> | bi | 1 | <a href="#">929</a> |
| 1 | <a href="#">1017</a> | 134  | bi | 1 | <a href="#">1497</a> | bi | 1 | <a href="#">925</a> | bi | 1 | <a href="#">852</a> | bi | 1 | <a href="#">930</a> |
| 1 | <a href="#">1018</a> | 451  | bi | 1 | <a href="#">1498</a> | bi | 1 | <a href="#">926</a> | bi | 1 | <a href="#">853</a> | bi | 1 | <a href="#">931</a> |
| 1 | <a href="#">1019</a> | 62   | bi | 1 | <a href="#">1499</a> | bi | 1 | <a href="#">927</a> | bi | 1 | <a href="#">854</a> | bi | 1 | <a href="#">932</a> |
| 1 | <a href="#">1020</a> | 102  | bi | 1 | <a href="#">1500</a> | bi | 1 | <a href="#">928</a> | bi | 1 | <a href="#">855</a> | bi | 1 | <a href="#">933</a> |
| 1 | <a href="#">1021</a> | 43   | bi | 1 | <a href="#">1501</a> | bi | 1 | <a href="#">929</a> | bi | 1 | <a href="#">856</a> | bi | 1 | <a href="#">934</a> |
| 1 | <a href="#">1022</a> | 52   | -  |   |                      | -  |   |                     | -  |   |                     | -  |   |                     |
| 1 | <a href="#">1023</a> | 254  | bi | 1 | <a href="#">1502</a> | bi | 1 | <a href="#">930</a> | bi | 1 | <a href="#">857</a> | bi | 1 | <a href="#">935</a> |
| 1 | <a href="#">1024</a> | 491  | bi | 1 | <a href="#">1503</a> | bi | 1 | <a href="#">931</a> | bi | 1 | <a href="#">858</a> | bi | 1 | <a href="#">936</a> |
| 1 | <a href="#">1025</a> | 240  | bi | 1 | <a href="#">1504</a> | bi | 1 | <a href="#">932</a> | bi | 1 | <a href="#">859</a> | bi | 1 | <a href="#">937</a> |
| 1 | <a href="#">1026</a> | 183  | bi | 1 | <a href="#">1506</a> | bi | 1 | <a href="#">934</a> | bi | 1 | <a href="#">860</a> | bi | 1 | <a href="#">939</a> |
| 1 | <a href="#">1027</a> | 1197 | bi | 1 | <a href="#">1507</a> | bi | 1 | <a href="#">935</a> | bi | 1 | <a href="#">861</a> | bi | 1 | <a href="#">940</a> |
| 1 | <a href="#">1028</a> | 1265 | bi | 1 | <a href="#">1508</a> | bi | 1 | <a href="#">936</a> | bi | 1 | <a href="#">862</a> | bi | 1 | <a href="#">941</a> |
| 1 | <a href="#">1029</a> | 115  | bi | 1 | <a href="#">1509</a> | bi | 1 | <a href="#">937</a> | bi | 1 | <a href="#">863</a> | bi | 1 | <a href="#">942</a> |
| 1 | <a href="#">1030</a> | 349  | bi | 1 | <a href="#">1510</a> | bi | 1 | <a href="#">938</a> | bi | 1 | <a href="#">864</a> | bi | 1 | <a href="#">943</a> |
| 1 | <a href="#">1031</a> | 808  | bi | 1 | <a href="#">1511</a> | bi | 1 | <a href="#">939</a> | bi | 1 | <a href="#">865</a> | bi | 1 | <a href="#">944</a> |
| 1 | <a href="#">1032</a> | 222  | bi | 1 | <a href="#">1512</a> | bi | 1 | <a href="#">940</a> | bi | 1 | <a href="#">866</a> | bi | 1 | <a href="#">945</a> |
| 1 | <a href="#">1033</a> | 238  | bi | 1 | <a href="#">1513</a> | bi | 1 | <a href="#">941</a> | bi | 1 | <a href="#">867</a> | bi | 1 | <a href="#">946</a> |
| 1 | <a href="#">1034</a> | 276  | bi | 1 | <a href="#">1514</a> | bi | 1 | <a href="#">942</a> | bi | 1 | <a href="#">868</a> | bi | 1 | <a href="#">947</a> |
| 1 | <a href="#">1035</a> | 244  | bi | 1 | <a href="#">1515</a> | bi | 1 | <a href="#">943</a> | bi | 1 | <a href="#">869</a> | bi | 1 | <a href="#">948</a> |

|   |                      |     |    |   |                      |    |   |                     |     |   |                      |    |   |                      |
|---|----------------------|-----|----|---|----------------------|----|---|---------------------|-----|---|----------------------|----|---|----------------------|
| 1 | <a href="#">1036</a> | 274 | bi | 1 | <a href="#">1516</a> | bi | 1 | <a href="#">944</a> | bi  | 1 | <a href="#">870</a>  | bi | 1 | <a href="#">949</a>  |
| 1 | <a href="#">1037</a> | 452 | bi | 1 | <a href="#">1517</a> | bi | 1 | <a href="#">945</a> | bi  | 1 | <a href="#">871</a>  | bi | 1 | <a href="#">950</a>  |
| 1 | <a href="#">1038</a> | 171 | bi | 1 | <a href="#">1518</a> | bi | 1 | <a href="#">946</a> | bi  | 1 | <a href="#">872</a>  | bi | 1 | <a href="#">951</a>  |
| 1 | <a href="#">1039</a> | 255 | bi | 1 | <a href="#">1519</a> | bi | 1 | <a href="#">947</a> | bi  | 1 | <a href="#">873</a>  | bi | 1 | <a href="#">952</a>  |
| 1 | <a href="#">1040</a> | 356 | bi | 1 | <a href="#">1520</a> | bi | 1 | <a href="#">948</a> | bi  | 1 | <a href="#">874</a>  | bi | 1 | <a href="#">953</a>  |
| 1 | <a href="#">1041</a> | 153 | bi | 1 | <a href="#">1521</a> | bi | 1 | <a href="#">949</a> | bi  | 1 | <a href="#">875</a>  | bi | 1 | <a href="#">954</a>  |
| 1 | <a href="#">1042</a> | 496 | bi | 1 | <a href="#">1522</a> | bi | 1 | <a href="#">950</a> | bi  | 1 | <a href="#">876</a>  | bi | 1 | <a href="#">955</a>  |
| 1 | <a href="#">1043</a> | 100 | bi | 1 | <a href="#">1523</a> | bi | 1 | <a href="#">951</a> | bi  | 1 | <a href="#">877</a>  | bi | 1 | <a href="#">956</a>  |
| 1 | <a href="#">1044</a> | 213 | bi | 1 | <a href="#">1524</a> | bi | 1 | <a href="#">952</a> | bi  | 1 | <a href="#">878</a>  | bi | 1 | <a href="#">957</a>  |
| 1 | <a href="#">1045</a> | 287 | bi | 1 | <a href="#">1525</a> | bi | 1 | <a href="#">953</a> | bi  | 1 | <a href="#">879</a>  | bi | 1 | <a href="#">958</a>  |
| 1 | <a href="#">1046</a> | 237 | bi | 1 | <a href="#">1526</a> | bi | 1 | <a href="#">954</a> | bi  | 1 | <a href="#">880</a>  | bi | 1 | <a href="#">959</a>  |
| 1 | <a href="#">1047</a> | 163 | bi | 1 | <a href="#">1527</a> | bi | 1 | <a href="#">955</a> | bi  | 1 | <a href="#">881</a>  | bi | 1 | <a href="#">960</a>  |
| 1 | <a href="#">1048</a> | 234 | bi | 1 | <a href="#">1528</a> | bi | 1 | <a href="#">956</a> | bi  | 1 | <a href="#">882</a>  | bi | 1 | <a href="#">961</a>  |
| 1 | <a href="#">1049</a> | 390 | bi | 1 | <a href="#">1529</a> | bi | 1 | <a href="#">957</a> | bi  | 1 | <a href="#">883</a>  | bi | 1 | <a href="#">962</a>  |
| 1 | <a href="#">1050</a> | 307 | bi | 1 | <a href="#">1530</a> | bi | 1 | <a href="#">958</a> | bi  | 1 | <a href="#">884</a>  | bi | 1 | <a href="#">963</a>  |
| 1 | <a href="#">1051</a> | 49  | bi | 1 | <a href="#">1531</a> | -  |   |                     | bi  | 1 | <a href="#">885</a>  | -  |   |                      |
| 1 | <a href="#">1052</a> | 92  | -  |   |                      | bi | 1 | <a href="#">959</a> | -   |   |                      | bi | 1 | <a href="#">964</a>  |
| 1 | <a href="#">1053</a> | 275 | bi | 1 | <a href="#">1532</a> | bi | 1 | <a href="#">960</a> | bi  | 1 | <a href="#">886</a>  | bi | 1 | <a href="#">965</a>  |
| 1 | <a href="#">1054</a> | 241 | bi | 1 | <a href="#">1533</a> | bi | 1 | <a href="#">961</a> | bi  | 1 | <a href="#">887</a>  | bi | 1 | <a href="#">966</a>  |
| 1 | <a href="#">1055</a> | 125 | bi | 1 | <a href="#">1534</a> | bi | 1 | <a href="#">962</a> | bi  | 1 | <a href="#">888</a>  | bi | 1 | <a href="#">967</a>  |
| 1 | <a href="#">1056</a> | 149 | bi | 1 | <a href="#">1535</a> | bi | 1 | <a href="#">963</a> | bi  | 1 | <a href="#">889</a>  | bi | 1 | <a href="#">968</a>  |
| 1 | <a href="#">1057</a> | 271 | bi | 1 | <a href="#">1536</a> | bi | 1 | <a href="#">964</a> | bi  | 1 | <a href="#">890</a>  | bi | 1 | <a href="#">969</a>  |
| 1 | <a href="#">1058</a> | 457 | bi | 1 | <a href="#">1537</a> | bi | 1 | <a href="#">965</a> | bi  | 1 | <a href="#">891</a>  | bi | 1 | <a href="#">970</a>  |
| 1 | <a href="#">1059</a> | 284 | bi | 1 | <a href="#">1538</a> | bi | 1 | <a href="#">966</a> | bi  | 1 | <a href="#">892</a>  | bi | 1 | <a href="#">971</a>  |
| 1 | <a href="#">1060</a> | 146 | bi | 1 | <a href="#">1539</a> | bi | 1 | <a href="#">967</a> | bi  | 1 | <a href="#">893</a>  | bi | 1 | <a href="#">972</a>  |
| 1 | <a href="#">1061</a> | 209 | bi | 1 | <a href="#">1540</a> | bi | 1 | <a href="#">968</a> | bi  | 1 | <a href="#">894</a>  | bi | 1 | <a href="#">973</a>  |
| 1 | <a href="#">1062</a> | 537 | bi | 1 | <a href="#">1541</a> | bi | 1 | <a href="#">969</a> | bi  | 1 | <a href="#">895</a>  | bi | 1 | <a href="#">974</a>  |
| 1 | <a href="#">1063</a> | 779 | bi | 1 | <a href="#">1542</a> | bi | 1 | <a href="#">970</a> | bi  | 1 | <a href="#">896</a>  | bi | 1 | <a href="#">975</a>  |
| 1 | <a href="#">1064</a> | 206 | bi | 1 | <a href="#">1543</a> | bi | 1 | <a href="#">971</a> | bi  | 1 | <a href="#">897</a>  | bi | 1 | <a href="#">976</a>  |
| 1 | <a href="#">1065</a> | 181 | bi | 1 | <a href="#">1544</a> | bi | 1 | <a href="#">972</a> | bi  | 1 | <a href="#">898</a>  | bi | 1 | <a href="#">977</a>  |
| 1 | <a href="#">1066</a> | 137 | bi | 1 | <a href="#">1545</a> | bi | 1 | <a href="#">973</a> | bi  | 1 | <a href="#">899</a>  | bi | 1 | <a href="#">978</a>  |
| 1 | <a href="#">1067</a> | 388 | bi | 1 | <a href="#">1547</a> | bi | 1 | <a href="#">974</a> | bi  | 1 | <a href="#">900</a>  | bi | 1 | <a href="#">980</a>  |
| 1 | <a href="#">1068</a> | 499 | bi | 1 | <a href="#">1548</a> | bi | 1 | <a href="#">975</a> | bi  | 1 | <a href="#">901</a>  | bi | 1 | <a href="#">981</a>  |
| 1 | <a href="#">1069</a> | 239 | bi | 1 | <a href="#">1549</a> | bi | 1 | <a href="#">976</a> | bi  | 1 | <a href="#">902</a>  | bi | 1 | <a href="#">982</a>  |
| 1 | <a href="#">1070</a> | 216 | bi | 1 | <a href="#">1550</a> | bi | 1 | <a href="#">977</a> | bi  | 1 | <a href="#">903</a>  | bi | 1 | <a href="#">983</a>  |
| 1 | <a href="#">1071</a> | 255 | bi | 1 | <a href="#">1551</a> | bi | 1 | <a href="#">978</a> | bi  | 1 | <a href="#">904</a>  | bi | 1 | <a href="#">984</a>  |
| 1 | <a href="#">1072</a> | 433 | bi | 1 | <a href="#">1552</a> | bi | 1 | <a href="#">979</a> | bi  | 1 | <a href="#">905</a>  | bi | 1 | <a href="#">985</a>  |
| 1 | <a href="#">1073</a> | 308 | bi | 1 | <a href="#">1553</a> | bi | 1 | <a href="#">980</a> | bi  | 1 | <a href="#">906</a>  | bi | 1 | <a href="#">986</a>  |
| 1 | <a href="#">1074</a> | 110 | bi | 1 | <a href="#">1554</a> | bi | 1 | <a href="#">981</a> | bi  | 1 | <a href="#">907</a>  | bi | 1 | <a href="#">987</a>  |
| 1 | <a href="#">1075</a> | 452 | bi | 1 | <a href="#">1555</a> | bi | 1 | <a href="#">982</a> | bi  | 1 | <a href="#">908</a>  | bi | 1 | <a href="#">988</a>  |
| 1 | <a href="#">1076</a> | 173 | bi | 1 | <a href="#">1556</a> | bi | 1 | <a href="#">983</a> | bi  | 1 | <a href="#">910</a>  | bi | 1 | <a href="#">989</a>  |
| 1 | <a href="#">1077</a> | 794 | bi | 1 | <a href="#">1557</a> | bi | 1 | <a href="#">984</a> | bi  | 1 | <a href="#">911</a>  | bi | 1 | <a href="#">990</a>  |
| 1 | <a href="#">1078</a> | 322 | bi | 1 | <a href="#">1558</a> | bi | 1 | <a href="#">985</a> | bi  | 1 | <a href="#">912</a>  | bi | 1 | <a href="#">991</a>  |
| 1 | <a href="#">1079</a> | 228 | bi | 1 | <a href="#">1559</a> | bi | 1 | <a href="#">986</a> | bi  | 1 | <a href="#">913</a>  | bi | 1 | <a href="#">992</a>  |
| 1 | <a href="#">1080</a> | 165 | bi | 1 | <a href="#">1560</a> | bi | 1 | <a href="#">987</a> | bi  | 1 | <a href="#">914</a>  | bi | 1 | <a href="#">993</a>  |
| 1 | <a href="#">1081</a> | 319 | bi | 1 | <a href="#">1561</a> | bi | 1 | <a href="#">988</a> | bi  | 1 | <a href="#">915</a>  | bi | 1 | <a href="#">994</a>  |
| 1 | <a href="#">1082</a> | 290 | bi | 1 | <a href="#">1562</a> | bi | 1 | <a href="#">989</a> | bi  | 1 | <a href="#">916</a>  | bi | 1 | <a href="#">995</a>  |
| 1 | <a href="#">1083</a> | 52  | bi | 1 | <a href="#">1563</a> | bi | 1 | <a href="#">990</a> | -   |   |                      | bi | 1 | <a href="#">996</a>  |
| 1 | <a href="#">1084</a> | 431 | bi | 1 | <a href="#">1564</a> | bi | 1 | <a href="#">991</a> | bi  | 1 | <a href="#">917</a>  | bi | 1 | <a href="#">997</a>  |
| 1 | <a href="#">1085</a> | 431 | bi | 1 | <a href="#">1565</a> | bi | 1 | <a href="#">992</a> | bi  | 1 | <a href="#">918</a>  | bi | 1 | <a href="#">998</a>  |
| 1 | <a href="#">1086</a> | 90  | bi | 1 | <a href="#">1566</a> | bi | 1 | <a href="#">993</a> | bi  | 1 | <a href="#">919</a>  | bi | 1 | <a href="#">999</a>  |
| 1 | <a href="#">1087</a> | 371 | -  |   |                      | -  |   |                     | uni | 1 | <a href="#">1664</a> | -  |   |                      |
| 1 | <a href="#">1088</a> | 249 | -  |   |                      | -  |   |                     | -   |   |                      | -  |   |                      |
| 1 | <a href="#">1089</a> | 198 | -  |   |                      | -  |   |                     | -   |   |                      | -  |   |                      |
| 1 | <a href="#">1090</a> | 133 | -  |   |                      | -  |   |                     | bi  | 1 | <a href="#">1663</a> | -  |   |                      |
| 1 | <a href="#">1091</a> | 355 | bi | 1 | <a href="#">1567</a> | bi | 1 | <a href="#">994</a> | bi  | 1 | <a href="#">920</a>  | bi | 1 | <a href="#">1000</a> |
| 1 | <a href="#">1092</a> | 71  | bi | 1 | <a href="#">1568</a> | bi | 1 | <a href="#">995</a> | bi  | 1 | <a href="#">921</a>  | bi | 1 | <a href="#">1001</a> |

|   |                      |     |     |   |                      |     |   |                      |     |   |                     |     |   |                      |
|---|----------------------|-----|-----|---|----------------------|-----|---|----------------------|-----|---|---------------------|-----|---|----------------------|
| 1 | <a href="#">1093</a> | 293 | bi  | 1 | <a href="#">1569</a> | bi  | 1 | <a href="#">996</a>  | bi  | 1 | <a href="#">922</a> | bi  | 1 | <a href="#">1002</a> |
| 1 | <a href="#">1094</a> | 83  | bi  | 1 | <a href="#">1570</a> | bi  | 1 | <a href="#">997</a>  | bi  | 1 | <a href="#">923</a> | bi  | 1 | <a href="#">1003</a> |
| 1 | <a href="#">1095</a> | 245 | bi  | 1 | <a href="#">1571</a> | bi  | 1 | <a href="#">998</a>  | bi  | 1 | <a href="#">924</a> | bi  | 1 | <a href="#">1004</a> |
| 1 | <a href="#">1096</a> | 153 | bi  | 1 | <a href="#">1572</a> | bi  | 1 | <a href="#">999</a>  | bi  | 1 | <a href="#">925</a> | bi  | 1 | <a href="#">1005</a> |
| 1 | <a href="#">1097</a> | 356 | bi  | 1 | <a href="#">1573</a> | bi  | 1 | <a href="#">1000</a> | bi  | 1 | <a href="#">926</a> | bi  | 1 | <a href="#">1008</a> |
| 1 | <a href="#">1098</a> | 291 | bi  | 1 | <a href="#">1574</a> | bi  | 1 | <a href="#">1001</a> | bi  | 1 | <a href="#">927</a> | bi  | 1 | <a href="#">1009</a> |
| 1 | <a href="#">1099</a> | 563 | bi  | 1 | <a href="#">1575</a> | bi  | 1 | <a href="#">1002</a> | bi  | 1 | <a href="#">928</a> | bi  | 1 | <a href="#">1010</a> |
| 1 | <a href="#">1100</a> | 461 | bi  | 1 | <a href="#">1576</a> | bi  | 1 | <a href="#">1003</a> | bi  | 1 | <a href="#">929</a> | bi  | 1 | <a href="#">1011</a> |
| 1 | <a href="#">1101</a> | 210 | bi  | 1 | <a href="#">1577</a> | bi  | 1 | <a href="#">1004</a> | bi  | 1 | <a href="#">930</a> | bi  | 1 | <a href="#">1012</a> |
| 1 | <a href="#">1102</a> | 257 | bi  | 1 | <a href="#">1578</a> | bi  | 1 | <a href="#">1005</a> | bi  | 1 | <a href="#">931</a> | bi  | 1 | <a href="#">1013</a> |
| 1 | <a href="#">1103</a> | 218 | bi  | 1 | <a href="#">1579</a> | bi  | 1 | <a href="#">1006</a> | bi  | 1 | <a href="#">932</a> | bi  | 1 | <a href="#">1014</a> |
| 1 | <a href="#">1104</a> | 190 | bi  | 1 | <a href="#">1580</a> | bi  | 1 | <a href="#">1007</a> | bi  | 1 | <a href="#">933</a> | bi  | 1 | <a href="#">1015</a> |
| 1 | <a href="#">1105</a> | 287 | bi  | 1 | <a href="#">1581</a> | bi  | 1 | <a href="#">1008</a> | bi  | 1 | <a href="#">934</a> | bi  | 1 | <a href="#">1016</a> |
| 1 | <a href="#">1106</a> | 222 | bi  | 1 | <a href="#">1582</a> | bi  | 1 | <a href="#">1009</a> | bi  | 1 | <a href="#">935</a> | bi  | 1 | <a href="#">1017</a> |
| 1 | <a href="#">1107</a> | 235 | bi  | 1 | <a href="#">1583</a> | bi  | 1 | <a href="#">1010</a> | bi  | 1 | <a href="#">936</a> | bi  | 1 | <a href="#">1018</a> |
| 1 | <a href="#">1108</a> | 610 | bi  | 1 | <a href="#">1584</a> | bi  | 1 | <a href="#">1011</a> | bi  | 1 | <a href="#">937</a> | bi  | 1 | <a href="#">1019</a> |
| 1 | <a href="#">1109</a> | 437 | bi  | 1 | <a href="#">1585</a> | bi  | 1 | <a href="#">1012</a> | bi  | 1 | <a href="#">938</a> | bi  | 1 | <a href="#">1020</a> |
| 1 | <a href="#">1110</a> | 285 | bi  | 1 | <a href="#">1586</a> | bi  | 1 | <a href="#">1013</a> | bi  | 1 | <a href="#">939</a> | bi  | 1 | <a href="#">1021</a> |
| 1 | <a href="#">1111</a> | 269 | bi  | 1 | <a href="#">1587</a> | bi  | 1 | <a href="#">1014</a> | bi  | 1 | <a href="#">940</a> | bi  | 1 | <a href="#">1022</a> |
| 1 | <a href="#">1112</a> | 305 | bi  | 1 | <a href="#">1588</a> | bi  | 1 | <a href="#">1015</a> | bi  | 1 | <a href="#">941</a> | bi  | 1 | <a href="#">1023</a> |
| 1 | <a href="#">1113</a> | 289 | bi  | 1 | <a href="#">1589</a> | bi  | 1 | <a href="#">1016</a> | bi  | 1 | <a href="#">942</a> | bi  | 1 | <a href="#">1024</a> |
| 1 | <a href="#">1114</a> | 164 | bi  | 1 | <a href="#">1590</a> | bi  | 1 | <a href="#">1017</a> | bi  | 1 | <a href="#">943</a> | bi  | 1 | <a href="#">1025</a> |
| 1 | <a href="#">1115</a> | 251 | bi  | 1 | <a href="#">1591</a> | bi  | 1 | <a href="#">1018</a> | bi  | 1 | <a href="#">944</a> | bi  | 1 | <a href="#">1026</a> |
| 1 | <a href="#">1116</a> | 90  | bi  | 1 | <a href="#">1592</a> | bi  | 1 | <a href="#">1019</a> | bi  | 1 | <a href="#">945</a> | bi  | 1 | <a href="#">1027</a> |
| 1 | <a href="#">1117</a> | 141 | bi  | 1 | <a href="#">1593</a> | bi  | 1 | <a href="#">1020</a> | bi  | 1 | <a href="#">946</a> | bi  | 1 | <a href="#">1028</a> |
| 1 | <a href="#">1118</a> | 102 | bi  | 1 | <a href="#">1594</a> | bi  | 1 | <a href="#">1021</a> | bi  | 1 | <a href="#">947</a> | bi  | 1 | <a href="#">1029</a> |
| 1 | <a href="#">3299</a> | 121 | uni | 1 | <a href="#">1595</a> | uni | 1 | <a href="#">1022</a> | uni | 1 | <a href="#">948</a> | uni | 1 | <a href="#">1030</a> |
| 1 | <a href="#">3300</a> | 154 | bi  | 1 | <a href="#">1595</a> | bi  | 1 | <a href="#">1022</a> | bi  | 1 | <a href="#">948</a> | bi  | 1 | <a href="#">1030</a> |
| 1 | <a href="#">1119</a> | 390 | bi  | 1 | <a href="#">1596</a> | bi  | 1 | <a href="#">1023</a> | bi  | 1 | <a href="#">949</a> | bi  | 1 | <a href="#">1031</a> |
| 1 | <a href="#">1120</a> | 442 | bi  | 1 | <a href="#">1597</a> | bi  | 1 | <a href="#">1024</a> | bi  | 1 | <a href="#">950</a> | bi  | 1 | <a href="#">1032</a> |
| 1 | <a href="#">1121</a> | 517 | bi  | 1 | <a href="#">1598</a> | bi  | 1 | <a href="#">1025</a> | bi  | 1 | <a href="#">951</a> | bi  | 1 | <a href="#">1033</a> |
| 1 | <a href="#">1122</a> | 231 | bi  | 1 | <a href="#">1599</a> | bi  | 1 | <a href="#">1026</a> | bi  | 1 | <a href="#">952</a> | bi  | 1 | <a href="#">1034</a> |
| 1 | <a href="#">1123</a> | 448 | bi  | 1 | <a href="#">1600</a> | bi  | 1 | <a href="#">1027</a> | bi  | 1 | <a href="#">953</a> | bi  | 1 | <a href="#">1035</a> |
| 1 | <a href="#">1124</a> | 304 | bi  | 1 | <a href="#">1601</a> | bi  | 1 | <a href="#">1028</a> | bi  | 1 | <a href="#">954</a> | bi  | 1 | <a href="#">1036</a> |
| 1 | <a href="#">1125</a> | 551 | bi  | 1 | <a href="#">1602</a> | bi  | 1 | <a href="#">1029</a> | bi  | 1 | <a href="#">955</a> | bi  | 1 | <a href="#">1037</a> |
| 1 | <a href="#">1126</a> | 235 | bi  | 1 | <a href="#">1603</a> | bi  | 1 | <a href="#">1030</a> | bi  | 1 | <a href="#">956</a> | bi  | 1 | <a href="#">1038</a> |
| 1 | <a href="#">1127</a> | 361 | bi  | 1 | <a href="#">1605</a> | bi  | 1 | <a href="#">1031</a> | bi  | 1 | <a href="#">957</a> | bi  | 1 | <a href="#">1039</a> |
| 1 | <a href="#">1128</a> | 240 | bi  | 1 | <a href="#">1606</a> | bi  | 1 | <a href="#">1032</a> | bi  | 1 | <a href="#">958</a> | bi  | 1 | <a href="#">1040</a> |
| 1 | <a href="#">1129</a> | 135 | bi  | 1 | <a href="#">1607</a> | bi  | 1 | <a href="#">1033</a> | bi  | 1 | <a href="#">959</a> | bi  | 1 | <a href="#">1041</a> |
| 1 | <a href="#">1130</a> | 279 | bi  | 1 | <a href="#">1608</a> | bi  | 1 | <a href="#">1034</a> | bi  | 1 | <a href="#">960</a> | bi  | 1 | <a href="#">1042</a> |
| 1 | <a href="#">1131</a> | 260 | bi  | 1 | <a href="#">1609</a> | bi  | 1 | <a href="#">1035</a> | bi  | 1 | <a href="#">961</a> | bi  | 1 | <a href="#">1043</a> |
| 1 | <a href="#">1132</a> | 347 | bi  | 1 | <a href="#">1610</a> | bi  | 1 | <a href="#">1036</a> | bi  | 1 | <a href="#">962</a> | bi  | 1 | <a href="#">1044</a> |
| 1 | <a href="#">1133</a> | 355 | bi  | 1 | <a href="#">1611</a> | bi  | 1 | <a href="#">1037</a> | bi  | 1 | <a href="#">963</a> | bi  | 1 | <a href="#">1045</a> |
| 1 | <a href="#">1134</a> | 580 | bi  | 1 | <a href="#">1612</a> | bi  | 1 | <a href="#">1038</a> | bi  | 1 | <a href="#">964</a> | bi  | 1 | <a href="#">1046</a> |
| 1 | <a href="#">1135</a> | 443 | bi  | 1 | <a href="#">1613</a> | bi  | 1 | <a href="#">1039</a> | bi  | 1 | <a href="#">965</a> | bi  | 1 | <a href="#">1047</a> |
| 1 | <a href="#">1136</a> | 295 | bi  | 1 | <a href="#">1614</a> | bi  | 1 | <a href="#">1040</a> | bi  | 1 | <a href="#">966</a> | bi  | 1 | <a href="#">1048</a> |
| 1 | <a href="#">1137</a> | 312 | bi  | 1 | <a href="#">1615</a> | bi  | 1 | <a href="#">1041</a> | bi  | 1 | <a href="#">967</a> | bi  | 1 | <a href="#">1049</a> |
| 1 | <a href="#">1138</a> | 203 | bi  | 1 | <a href="#">1616</a> | bi  | 1 | <a href="#">1042</a> | bi  | 1 | <a href="#">968</a> | bi  | 1 | <a href="#">1050</a> |
| 1 | <a href="#">1139</a> | 419 | bi  | 1 | <a href="#">1617</a> | bi  | 1 | <a href="#">1043</a> | bi  | 1 | <a href="#">969</a> | bi  | 1 | <a href="#">1051</a> |
| 1 | <a href="#">1140</a> | 497 | bi  | 1 | <a href="#">1618</a> | bi  | 1 | <a href="#">1044</a> | bi  | 1 | <a href="#">970</a> | bi  | 1 | <a href="#">1052</a> |
| 1 | <a href="#">1141</a> | 228 | bi  | 1 | <a href="#">1619</a> | bi  | 1 | <a href="#">1045</a> | bi  | 1 | <a href="#">971</a> | bi  | 1 | <a href="#">1053</a> |
| 1 | <a href="#">1142</a> | 35  | -   |   |                      | -   |   |                      | -   |   |                     | -   |   |                      |
| 1 | <a href="#">1143</a> | 275 | bi  | 1 | <a href="#">1620</a> | bi  | 1 | <a href="#">1046</a> | bi  | 1 | <a href="#">972</a> | bi  | 1 | <a href="#">1054</a> |
| 1 | <a href="#">1144</a> | 304 | bi  | 1 | <a href="#">1621</a> | bi  | 1 | <a href="#">1047</a> | bi  | 1 | <a href="#">973</a> | bi  | 1 | <a href="#">1055</a> |
| 1 | <a href="#">1145</a> | 294 | bi  | 1 | <a href="#">1622</a> | bi  | 1 | <a href="#">1048</a> | bi  | 1 | <a href="#">974</a> | bi  | 1 | <a href="#">1056</a> |
| 1 | <a href="#">1146</a> | 533 | bi  | 1 | <a href="#">1623</a> | bi  | 1 | <a href="#">1049</a> | bi  | 1 | <a href="#">975</a> | bi  | 1 | <a href="#">1057</a> |
| 1 | <a href="#">1147</a> | 198 | bi  | 1 | <a href="#">1624</a> | bi  | 1 | <a href="#">1050</a> | bi  | 1 | <a href="#">976</a> | bi  | 1 | <a href="#">1058</a> |



|   |                      |      |    |   |                      |    |   |                      |    |   |                      |    |   |                      |
|---|----------------------|------|----|---|----------------------|----|---|----------------------|----|---|----------------------|----|---|----------------------|
| 1 | <a href="#">1148</a> | 306  | bi | 1 | <a href="#">1625</a> | bi | 1 | <a href="#">1051</a> | bi | 1 | <a href="#">977</a>  | bi | 1 | <a href="#">1059</a> |
| 1 | <a href="#">1149</a> | 255  | bi | 1 | <a href="#">1626</a> | bi | 1 | <a href="#">1052</a> | bi | 1 | <a href="#">978</a>  | bi | 1 | <a href="#">1060</a> |
| 1 | <a href="#">1150</a> | 717  | bi | 1 | <a href="#">1627</a> | bi | 1 | <a href="#">1053</a> | bi | 1 | <a href="#">979</a>  | bi | 1 | <a href="#">1061</a> |
| 1 | <a href="#">1151</a> | 1092 | bi | 1 | <a href="#">1628</a> | bi | 1 | <a href="#">1054</a> | bi | 1 | <a href="#">980</a>  | bi | 1 | <a href="#">1062</a> |
| 1 | <a href="#">1152</a> | 322  | bi | 1 | <a href="#">1629</a> | bi | 1 | <a href="#">1055</a> | bi | 1 | <a href="#">981</a>  | bi | 1 | <a href="#">1063</a> |
| 1 | <a href="#">1153</a> | 177  | bi | 1 | <a href="#">1630</a> | bi | 1 | <a href="#">1056</a> | bi | 1 | <a href="#">982</a>  | bi | 1 | <a href="#">1064</a> |
| 1 | <a href="#">1154</a> | 238  | bi | 1 | <a href="#">1631</a> | bi | 1 | <a href="#">1057</a> | bi | 1 | <a href="#">983</a>  | bi | 1 | <a href="#">1065</a> |
| 1 | <a href="#">1155</a> | 478  | bi | 1 | <a href="#">1632</a> | bi | 1 | <a href="#">1058</a> | bi | 1 | <a href="#">984</a>  | bi | 1 | <a href="#">1066</a> |
| 1 | <a href="#">1156</a> | 350  | bi | 1 | <a href="#">1633</a> | bi | 1 | <a href="#">1059</a> | bi | 1 | <a href="#">985</a>  | bi | 1 | <a href="#">1067</a> |
| 1 | <a href="#">1157</a> | 153  | bi | 1 | <a href="#">1634</a> | bi | 1 | <a href="#">1060</a> | bi | 1 | <a href="#">986</a>  | bi | 1 | <a href="#">1068</a> |
| 1 | <a href="#">1158</a> | 114  | bi | 1 | <a href="#">1635</a> | bi | 1 | <a href="#">1061</a> | bi | 1 | <a href="#">987</a>  | bi | 1 | <a href="#">1069</a> |
| 1 | <a href="#">1159</a> | 88   | bi | 1 | <a href="#">1636</a> | bi | 1 | <a href="#">1062</a> | bi | 1 | <a href="#">988</a>  | bi | 1 | <a href="#">1070</a> |
| 1 | <a href="#">1160</a> | 571  | bi | 1 | <a href="#">1637</a> | bi | 1 | <a href="#">1063</a> | bi | 1 | <a href="#">989</a>  | bi | 1 | <a href="#">1071</a> |
| 1 | <a href="#">1161</a> | 224  | bi | 1 | <a href="#">1638</a> | bi | 1 | <a href="#">1064</a> | bi | 1 | <a href="#">990</a>  | bi | 1 | <a href="#">1072</a> |
| 1 | <a href="#">1162</a> | 36   | -  |   |                      | -  |   |                      | -  |   |                      | -  |   |                      |
| 1 | <a href="#">1163</a> | 330  | bi | 1 | <a href="#">1640</a> | bi | 1 | <a href="#">1066</a> | bi | 1 | <a href="#">992</a>  | bi | 1 | <a href="#">1073</a> |
| 1 | <a href="#">1164</a> | 296  | bi | 1 | <a href="#">1641</a> | bi | 1 | <a href="#">1067</a> | bi | 1 | <a href="#">993</a>  | bi | 1 | <a href="#">1074</a> |
| 1 | <a href="#">1165</a> | 256  | bi | 1 | <a href="#">1642</a> | bi | 1 | <a href="#">1068</a> | bi | 1 | <a href="#">994</a>  | bi | 1 | <a href="#">1075</a> |
| 1 | <a href="#">3301</a> | 154  | bi | 1 | <a href="#">1645</a> | bi | 1 | <a href="#">1071</a> | bi | 1 | <a href="#">995</a>  | bi | 1 | <a href="#">1076</a> |
| 1 | <a href="#">3302</a> | 259  | bi | 1 | <a href="#">1646</a> | bi | 1 | <a href="#">1072</a> | bi | 1 | <a href="#">996</a>  | bi | 1 | <a href="#">1077</a> |
| 1 | <a href="#">1166</a> | 69   | bi | 1 | <a href="#">1647</a> | bi | 1 | <a href="#">1073</a> | bi | 1 | <a href="#">997</a>  | bi | 1 | <a href="#">1078</a> |
| 1 | <a href="#">1167</a> | 260  | bi | 1 | <a href="#">1648</a> | bi | 1 | <a href="#">1074</a> | bi | 1 | <a href="#">998</a>  | bi | 1 | <a href="#">1079</a> |
| 1 | <a href="#">1168</a> | 240  | bi | 1 | <a href="#">1649</a> | bi | 1 | <a href="#">1075</a> | bi | 1 | <a href="#">999</a>  | bi | 1 | <a href="#">1080</a> |
| 1 | <a href="#">1169</a> | 490  | bi | 1 | <a href="#">1650</a> | bi | 1 | <a href="#">1076</a> | bi | 1 | <a href="#">1000</a> | bi | 1 | <a href="#">1081</a> |
| 1 | <a href="#">1170</a> | 184  | bi | 1 | <a href="#">1651</a> | bi | 1 | <a href="#">1077</a> | bi | 1 | <a href="#">1001</a> | bi | 1 | <a href="#">1082</a> |
| 1 | <a href="#">1171</a> | 234  | bi | 1 | <a href="#">1652</a> | bi | 1 | <a href="#">1078</a> | bi | 1 | <a href="#">1002</a> | bi | 1 | <a href="#">1083</a> |
| 1 | <a href="#">1172</a> | 703  | bi | 1 | <a href="#">1653</a> | bi | 1 | <a href="#">1079</a> | bi | 1 | <a href="#">1003</a> | bi | 1 | <a href="#">1084</a> |
| 1 | <a href="#">1173</a> | 391  | bi | 1 | <a href="#">1654</a> | bi | 1 | <a href="#">1080</a> | bi | 1 | <a href="#">1004</a> | bi | 1 | <a href="#">1085</a> |
| 1 | <a href="#">1174</a> | 34   | -  |   |                      | -  |   |                      | -  |   |                      | -  |   |                      |
| 1 | <a href="#">1175</a> | 306  | bi | 1 | <a href="#">1655</a> | bi | 1 | <a href="#">1081</a> | bi | 1 | <a href="#">1005</a> | bi | 1 | <a href="#">1086</a> |
| 1 | <a href="#">1176</a> | 807  | bi | 1 | <a href="#">1656</a> | bi | 1 | <a href="#">1082</a> | bi | 1 | <a href="#">1006</a> | bi | 1 | <a href="#">1087</a> |
| 1 | <a href="#">1177</a> | 629  | bi | 1 | <a href="#">1657</a> | bi | 1 | <a href="#">1083</a> | bi | 1 | <a href="#">1007</a> | bi | 1 | <a href="#">1088</a> |
| 1 | <a href="#">1178</a> | 158  | bi | 1 | <a href="#">1658</a> | bi | 1 | <a href="#">1084</a> | bi | 1 | <a href="#">1008</a> | bi | 1 | <a href="#">1089</a> |
| 1 | <a href="#">1179</a> | 400  | bi | 1 | <a href="#">1659</a> | bi | 1 | <a href="#">1085</a> | bi | 1 | <a href="#">1009</a> | bi | 1 | <a href="#">1090</a> |
| 1 | <a href="#">1180</a> | 100  | bi | 1 | <a href="#">1660</a> | bi | 1 | <a href="#">1086</a> | bi | 1 | <a href="#">1010</a> | bi | 1 | <a href="#">1091</a> |
| 1 | <a href="#">1181</a> | 102  | bi | 1 | <a href="#">1661</a> | bi | 1 | <a href="#">1087</a> | bi | 1 | <a href="#">1011</a> | bi | 1 | <a href="#">1092</a> |
| 1 | <a href="#">1182</a> | 799  | bi | 1 | <a href="#">1662</a> | bi | 1 | <a href="#">1088</a> | bi | 1 | <a href="#">1012</a> | bi | 1 | <a href="#">1093</a> |
| 1 | <a href="#">1183</a> | 117  | bi | 1 | <a href="#">1663</a> | bi | 1 | <a href="#">1089</a> | bi | 1 | <a href="#">1013</a> | bi | 1 | <a href="#">1094</a> |
| 1 | <a href="#">1184</a> | 158  | bi | 1 | <a href="#">1664</a> | bi | 1 | <a href="#">1090</a> | bi | 1 | <a href="#">1014</a> | bi | 1 | <a href="#">1095</a> |
| 1 | <a href="#">1185</a> | 161  | bi | 1 | <a href="#">1665</a> | bi | 1 | <a href="#">1091</a> | bi | 1 | <a href="#">1015</a> | bi | 1 | <a href="#">1096</a> |
| 1 | <a href="#">1186</a> | 61   | bi | 1 | <a href="#">1666</a> | bi | 1 | <a href="#">1092</a> | bi | 1 | <a href="#">1016</a> | bi | 1 | <a href="#">1097</a> |
| 1 | <a href="#">1187</a> | 257  | bi | 1 | <a href="#">1667</a> | bi | 1 | <a href="#">1093</a> | bi | 1 | <a href="#">1017</a> | bi | 1 | <a href="#">1098</a> |
| 1 | <a href="#">1188</a> | 281  | bi | 1 | <a href="#">1668</a> | bi | 1 | <a href="#">1094</a> | bi | 1 | <a href="#">1018</a> | bi | 1 | <a href="#">1099</a> |
| 1 | <a href="#">1189</a> | 31   | -  |   |                      | -  |   |                      | -  |   |                      | -  |   |                      |
| 1 | <a href="#">1190</a> | 124  | bi | 1 | <a href="#">1669</a> | bi | 1 | <a href="#">1095</a> | bi | 1 | <a href="#">1019</a> | bi | 1 | <a href="#">1100</a> |
| 1 | <a href="#">1191</a> | 136  | bi | 1 | <a href="#">1670</a> | bi | 1 | <a href="#">1096</a> | bi | 1 | <a href="#">1020</a> | bi | 1 | <a href="#">1101</a> |
| 1 | <a href="#">1192</a> | 131  | bi | 1 | <a href="#">1671</a> | bi | 1 | <a href="#">1097</a> | bi | 1 | <a href="#">1021</a> | bi | 1 | <a href="#">1102</a> |
| 1 | <a href="#">1193</a> | 171  | bi | 1 | <a href="#">1672</a> | bi | 1 | <a href="#">1098</a> | bi | 1 | <a href="#">1022</a> | bi | 1 | <a href="#">1103</a> |
| 1 | <a href="#">1194</a> | 120  | bi | 1 | <a href="#">1673</a> | bi | 1 | <a href="#">1099</a> | bi | 1 | <a href="#">1023</a> | bi | 1 | <a href="#">1104</a> |
| 1 | <a href="#">1195</a> | 123  | bi | 1 | <a href="#">1674</a> | bi | 1 | <a href="#">1100</a> | bi | 1 | <a href="#">1024</a> | bi | 1 | <a href="#">1105</a> |
| 1 | <a href="#">1196</a> | 978  | bi | 1 | <a href="#">1675</a> | bi | 1 | <a href="#">1101</a> | bi | 1 | <a href="#">1025</a> | bi | 1 | <a href="#">1106</a> |
| 1 | <a href="#">1197</a> | 309  | bi | 1 | <a href="#">1676</a> | bi | 1 | <a href="#">1102</a> | bi | 1 | <a href="#">1026</a> | bi | 1 | <a href="#">1107</a> |
| 1 | <a href="#">1198</a> | 486  | bi | 1 | <a href="#">1677</a> | bi | 1 | <a href="#">1103</a> | bi | 1 | <a href="#">1027</a> | bi | 1 | <a href="#">1108</a> |
| 1 | <a href="#">1199</a> | 590  | bi | 1 | <a href="#">1678</a> | bi | 1 | <a href="#">1104</a> | bi | 1 | <a href="#">1028</a> | bi | 1 | <a href="#">1109</a> |
| 1 | <a href="#">1200</a> | 132  | bi | 1 | <a href="#">1679</a> | bi | 1 | <a href="#">1105</a> | bi | 1 | <a href="#">1029</a> | bi | 1 | <a href="#">1110</a> |
| 1 | <a href="#">1201</a> | 366  | bi | 1 | <a href="#">1680</a> | bi | 1 | <a href="#">1106</a> | bi | 1 | <a href="#">1030</a> | bi | 1 | <a href="#">1111</a> |
| 1 | <a href="#">3303</a> | 307  | bi | 1 | <a href="#">1681</a> | bi | 1 | <a href="#">1107</a> | bi | 1 | <a href="#">1031</a> | bi | 1 | <a href="#">1112</a> |

|   |                      |      |     |   |                      |     |   |                      |     |   |                      |     |   |                      |
|---|----------------------|------|-----|---|----------------------|-----|---|----------------------|-----|---|----------------------|-----|---|----------------------|
| 1 | <a href="#">1202</a> | 319  | bi  | 1 | <a href="#">1682</a> | bi  | 1 | <a href="#">1108</a> | bi  | 1 | <a href="#">1032</a> | bi  | 1 | <a href="#">1113</a> |
| 1 | <a href="#">1203</a> | 199  | bi  | 1 | <a href="#">1683</a> | bi  | 1 | <a href="#">1109</a> | bi  | 1 | <a href="#">1033</a> | bi  | 1 | <a href="#">1114</a> |
| 1 | <a href="#">1204</a> | 114  | bi  | 1 | <a href="#">1684</a> | bi  | 1 | <a href="#">1110</a> | bi  | 1 | <a href="#">1034</a> | bi  | 1 | <a href="#">1115</a> |
| 1 | <a href="#">1205</a> | 114  | bi  | 1 | <a href="#">1685</a> | bi  | 1 | <a href="#">1111</a> | bi  | 1 | <a href="#">1035</a> | bi  | 1 | <a href="#">1116</a> |
| 1 | <a href="#">1206</a> | 87   | bi  | 1 | <a href="#">1686</a> | bi  | 1 | <a href="#">1112</a> | bi  | 1 | <a href="#">1036</a> | bi  | 1 | <a href="#">1117</a> |
| 1 | <a href="#">1207</a> | 392  | bi  | 1 | <a href="#">1687</a> | bi  | 1 | <a href="#">1113</a> | bi  | 1 | <a href="#">1037</a> | bi  | 1 | <a href="#">1118</a> |
| 1 | <a href="#">1208</a> | 383  | bi  | 1 | <a href="#">1688</a> | bi  | 1 | <a href="#">1114</a> | bi  | 1 | <a href="#">1038</a> | bi  | 1 | <a href="#">1119</a> |
| 1 | <a href="#">1209</a> | 296  | bi  | 1 | <a href="#">1689</a> | bi  | 1 | <a href="#">1115</a> | bi  | 1 | <a href="#">1039</a> | bi  | 1 | <a href="#">1120</a> |
| 1 | <a href="#">1210</a> | 292  | bi  | 1 | <a href="#">1690</a> | bi  | 1 | <a href="#">1116</a> | bi  | 1 | <a href="#">1040</a> | bi  | 1 | <a href="#">1121</a> |
| 1 | <a href="#">1211</a> | 887  | bi  | 1 | <a href="#">1691</a> | bi  | 1 | <a href="#">1118</a> | bi  | 1 | <a href="#">1041</a> | bi  | 1 | <a href="#">1122</a> |
| 1 | <a href="#">1212</a> | 395  | bi  | 1 | <a href="#">1692</a> | bi  | 1 | <a href="#">1119</a> | bi  | 1 | <a href="#">1042</a> | bi  | 1 | <a href="#">1123</a> |
| 1 | <a href="#">1213</a> | 348  | bi  | 1 | <a href="#">1693</a> | bi  | 1 | <a href="#">1120</a> | bi  | 1 | <a href="#">1043</a> | bi  | 1 | <a href="#">1124</a> |
| 1 | <a href="#">1214</a> | 180  | bi  | 1 | <a href="#">1694</a> | bi  | 1 | <a href="#">1121</a> | bi  | 1 | <a href="#">1044</a> | bi  | 1 | <a href="#">1125</a> |
| 1 | <a href="#">1215</a> | 610  | bi  | 1 | <a href="#">1695</a> | bi  | 1 | <a href="#">1122</a> | bi  | 1 | <a href="#">1045</a> | bi  | 1 | <a href="#">1126</a> |
| 1 | <a href="#">1216</a> | 41   | bi  | 1 | <a href="#">1696</a> | bi  | 1 | <a href="#">1123</a> | bi  | 1 | <a href="#">1046</a> | bi  | 1 | <a href="#">1127</a> |
| 1 | <a href="#">1217</a> | 390  | bi  | 1 | <a href="#">1697</a> | bi  | 1 | <a href="#">1124</a> | bi  | 1 | <a href="#">1047</a> | bi  | 1 | <a href="#">1128</a> |
| 1 | <a href="#">1218</a> | 245  | bi  | 1 | <a href="#">1698</a> | bi  | 1 | <a href="#">1125</a> | bi  | 1 | <a href="#">1048</a> | bi  | 1 | <a href="#">1129</a> |
| 1 | <a href="#">1219</a> | 731  | bi  | 1 | <a href="#">1699</a> | bi  | 1 | <a href="#">1126</a> | bi  | 1 | <a href="#">1049</a> | bi  | 1 | <a href="#">1130</a> |
| 1 | <a href="#">1220</a> | 154  | bi  | 1 | <a href="#">1700</a> | bi  | 1 | <a href="#">1127</a> | bi  | 1 | <a href="#">1050</a> | bi  | 1 | <a href="#">1131</a> |
| 1 | <a href="#">1221</a> | 406  | bi  | 1 | <a href="#">1701</a> | bi  | 1 | <a href="#">1128</a> | bi  | 1 | <a href="#">1051</a> | bi  | 1 | <a href="#">1132</a> |
| 1 | <a href="#">1222</a> | 59   | bi  | 1 | <a href="#">1702</a> | bi  | 1 | <a href="#">1129</a> | bi  | 1 | <a href="#">1052</a> | bi  | 1 | <a href="#">1133</a> |
| 1 | <a href="#">1223</a> | 276  | bi  | 1 | <a href="#">1703</a> | bi  | 1 | <a href="#">1130</a> | bi  | 1 | <a href="#">1053</a> | bi  | 1 | <a href="#">1134</a> |
| 1 | <a href="#">1224</a> | 383  | bi  | 1 | <a href="#">1704</a> | bi  | 1 | <a href="#">1131</a> | bi  | 1 | <a href="#">1054</a> | bi  | 1 | <a href="#">1135</a> |
| 1 | <a href="#">1225</a> | 129  | bi  | 1 | <a href="#">1705</a> | bi  | 1 | <a href="#">1132</a> | bi  | 1 | <a href="#">1055</a> | bi  | 1 | <a href="#">1136</a> |
| 1 | <a href="#">1226</a> | 220  | bi  | 1 | <a href="#">1706</a> | bi  | 1 | <a href="#">1133</a> | bi  | 1 | <a href="#">1056</a> | bi  | 1 | <a href="#">1137</a> |
| 1 | <a href="#">1227</a> | 234  | bi  | 1 | <a href="#">1707</a> | bi  | 1 | <a href="#">1134</a> | bi  | 1 | <a href="#">1057</a> | bi  | 1 | <a href="#">1138</a> |
| 1 | <a href="#">1228</a> | 879  | bi  | 1 | <a href="#">1708</a> | bi  | 1 | <a href="#">1135</a> | bi  | 1 | <a href="#">1058</a> | bi  | 1 | <a href="#">1139</a> |
| 1 | <a href="#">1229</a> | 175  | bi  | 1 | <a href="#">1709</a> | bi  | 1 | <a href="#">1136</a> | bi  | 1 | <a href="#">1059</a> | bi  | 1 | <a href="#">1140</a> |
| 1 | <a href="#">3304</a> | 159  | uni | 1 | <a href="#">1710</a> | bi  | 1 | <a href="#">1137</a> | uni | 1 | <a href="#">1060</a> | uni | 1 | <a href="#">1141</a> |
| 1 | <a href="#">3305</a> | 316  | bi  | 1 | <a href="#">1710</a> | uni | 1 | <a href="#">1137</a> | bi  | 1 | <a href="#">1060</a> | bi  | 1 | <a href="#">1141</a> |
| 1 | <a href="#">1230</a> | 78   | bi  | 1 | <a href="#">1711</a> | bi  | 1 | <a href="#">1138</a> | bi  | 1 | <a href="#">1061</a> | bi  | 1 | <a href="#">1142</a> |
| 1 | <a href="#">1231</a> | 60   | bi  | 1 | <a href="#">1712</a> | bi  | 1 | <a href="#">1139</a> | bi  | 1 | <a href="#">1062</a> | bi  | 1 | <a href="#">1143</a> |
| 1 | <a href="#">1232</a> | 203  | bi  | 1 | <a href="#">1713</a> | bi  | 1 | <a href="#">1140</a> | bi  | 1 | <a href="#">1063</a> | bi  | 1 | <a href="#">1144</a> |
| 1 | <a href="#">1233</a> | 1416 | bi  | 1 | <a href="#">1714</a> | bi  | 1 | <a href="#">1141</a> | bi  | 1 | <a href="#">1064</a> | bi  | 1 | <a href="#">1145</a> |
| 1 | <a href="#">1234</a> | 236  | bi  | 1 | <a href="#">1715</a> | bi  | 1 | <a href="#">1142</a> | bi  | 1 | <a href="#">1065</a> | bi  | 1 | <a href="#">1146</a> |
| 1 | <a href="#">1235</a> | 378  | -   |   |                      | -   |   |                      | -   |   |                      | bi  | 1 | <a href="#">1148</a> |
| 1 | <a href="#">1236</a> | 267  | -   |   |                      | -   |   |                      | -   |   |                      | bi  | 1 | <a href="#">1149</a> |
| 1 | <a href="#">1237</a> | 315  | uni | 1 | <a href="#">723</a>  | uni | 1 | <a href="#">352</a>  | uni | 1 | <a href="#">297</a>  | bi  | 1 | <a href="#">1150</a> |
| 1 | <a href="#">1238</a> | 198  | -   |   |                      | -   |   |                      | -   |   |                      | bi  | 1 | <a href="#">1152</a> |
| 1 | <a href="#">1239</a> | 238  | bi  | 1 | <a href="#">2061</a> | bi  | 1 | <a href="#">1486</a> | bi  | 1 | <a href="#">1411</a> | bi  | 1 | <a href="#">1153</a> |
| 1 | <a href="#">1240</a> | 244  | -   |   |                      | -   |   |                      | -   |   |                      | bi  | 1 | <a href="#">1154</a> |
| 1 | <a href="#">1241</a> | 437  | -   |   |                      | -   |   |                      | -   |   |                      | bi  | 1 | <a href="#">1155</a> |
| 1 | <a href="#">1242</a> | 235  | uni | 1 | <a href="#">2451</a> | uni | 1 | <a href="#">1562</a> | uni | 1 | <a href="#">1374</a> | bi  | 1 | <a href="#">1156</a> |
| 1 | <a href="#">1243</a> | 144  | -   |   |                      | -   |   |                      | -   |   |                      | bi  | 1 | <a href="#">1157</a> |
| 1 | <a href="#">1244</a> | 305  | bi  | 1 | <a href="#">1733</a> | bi  | 1 | <a href="#">1166</a> | bi  | 1 | <a href="#">1093</a> | bi  | 1 | <a href="#">1158</a> |
| 1 | <a href="#">1245</a> | 154  | bi  | 1 | <a href="#">1734</a> | bi  | 1 | <a href="#">1167</a> | bi  | 1 | <a href="#">1094</a> | bi  | 1 | <a href="#">1159</a> |
| 1 | <a href="#">1246</a> | 167  | bi  | 1 | <a href="#">1735</a> | bi  | 1 | <a href="#">1168</a> | bi  | 1 | <a href="#">1095</a> | bi  | 1 | <a href="#">1160</a> |
| 1 | <a href="#">1247</a> | 780  | bi  | 1 | <a href="#">1736</a> | bi  | 1 | <a href="#">1169</a> | bi  | 1 | <a href="#">1096</a> | bi  | 1 | <a href="#">1161</a> |
| 1 | <a href="#">1248</a> | 163  | bi  | 1 | <a href="#">1737</a> | bi  | 1 | <a href="#">1170</a> | bi  | 1 | <a href="#">1097</a> | bi  | 1 | <a href="#">1162</a> |
| 1 | <a href="#">1249</a> | 288  | bi  | 1 | <a href="#">1738</a> | bi  | 1 | <a href="#">1171</a> | bi  | 1 | <a href="#">1098</a> | bi  | 1 | <a href="#">1163</a> |
| 1 | <a href="#">1250</a> | 448  | bi  | 1 | <a href="#">1739</a> | bi  | 1 | <a href="#">1172</a> | bi  | 1 | <a href="#">1099</a> | bi  | 1 | <a href="#">1164</a> |
| 1 | <a href="#">1251</a> | 417  | bi  | 1 | <a href="#">1740</a> | bi  | 1 | <a href="#">1173</a> | bi  | 1 | <a href="#">1100</a> | bi  | 1 | <a href="#">1165</a> |
| 1 | <a href="#">1252</a> | 38   | -   |   |                      | -   |   |                      | -   |   |                      | bi  | 1 | <a href="#">1166</a> |
| 1 | <a href="#">1253</a> | 589  | bi  | 1 | <a href="#">1741</a> | bi  | 1 | <a href="#">1174</a> | bi  | 1 | <a href="#">1101</a> | bi  | 1 | <a href="#">1167</a> |
| 1 | <a href="#">1254</a> | 542  | bi  | 1 | <a href="#">1742</a> | bi  | 1 | <a href="#">1175</a> | bi  | 1 | <a href="#">1102</a> | bi  | 1 | <a href="#">1168</a> |
| 1 | <a href="#">1255</a> | 538  | bi  | 1 | <a href="#">1743</a> | bi  | 1 | <a href="#">1176</a> | bi  | 1 | <a href="#">1103</a> | bi  | 1 | <a href="#">1169</a> |
| 1 | <a href="#">1256</a> | 194  | bi  | 1 | <a href="#">1744</a> | bi  | 1 | <a href="#">1177</a> | bi  | 1 | <a href="#">1104</a> | bi  | 1 | <a href="#">1170</a> |

|   |                      |     |    |   |                      |    |   |                      |    |   |                      |    |   |                      |
|---|----------------------|-----|----|---|----------------------|----|---|----------------------|----|---|----------------------|----|---|----------------------|
| 1 | <a href="#">1257</a> | 31  | -  |   |                      | -  |   |                      | -  |   |                      | -  |   |                      |
| 1 | <a href="#">1258</a> | 871 | bi | 1 | <a href="#">1745</a> | bi | 1 | <a href="#">1178</a> | bi | 1 | <a href="#">1105</a> | bi | 1 | <a href="#">1171</a> |
| 1 | <a href="#">1259</a> | 372 | bi | 1 | <a href="#">1746</a> | bi | 1 | <a href="#">1179</a> | bi | 1 | <a href="#">1106</a> | bi | 1 | <a href="#">1172</a> |
| 1 | <a href="#">1260</a> | 326 | bi | 1 | <a href="#">1747</a> | bi | 1 | <a href="#">1180</a> | bi | 1 | <a href="#">1107</a> | bi | 1 | <a href="#">1173</a> |
| 1 | <a href="#">1261</a> | 540 | bi | 1 | <a href="#">1748</a> | bi | 1 | <a href="#">1181</a> | bi | 1 | <a href="#">1108</a> | bi | 1 | <a href="#">1174</a> |
| 1 | <a href="#">1262</a> | 469 | bi | 1 | <a href="#">1749</a> | bi | 1 | <a href="#">1182</a> | bi | 1 | <a href="#">1109</a> | bi | 1 | <a href="#">1175</a> |
| 1 | <a href="#">1263</a> | 329 | bi | 1 | <a href="#">1750</a> | bi | 1 | <a href="#">1183</a> | bi | 1 | <a href="#">1110</a> | bi | 1 | <a href="#">1177</a> |
| 1 | <a href="#">1264</a> | 380 | bi | 1 | <a href="#">1751</a> | bi | 1 | <a href="#">1184</a> | bi | 1 | <a href="#">1111</a> | bi | 1 | <a href="#">1178</a> |
| 1 | <a href="#">1265</a> | 133 | bi | 1 | <a href="#">1752</a> | bi | 1 | <a href="#">1185</a> | bi | 1 | <a href="#">1112</a> | bi | 1 | <a href="#">1179</a> |
| 1 | <a href="#">1266</a> | 328 | bi | 1 | <a href="#">1753</a> | bi | 1 | <a href="#">1186</a> | bi | 1 | <a href="#">1113</a> | bi | 1 | <a href="#">1180</a> |
| 1 | <a href="#">1267</a> | 201 | bi | 1 | <a href="#">1754</a> | bi | 1 | <a href="#">1187</a> | bi | 1 | <a href="#">1114</a> | bi | 1 | <a href="#">1181</a> |
| 1 | <a href="#">1268</a> | 256 | bi | 1 | <a href="#">1755</a> | bi | 1 | <a href="#">1188</a> | bi | 1 | <a href="#">1115</a> | bi | 1 | <a href="#">1182</a> |
| 1 | <a href="#">1269</a> | 384 | bi | 1 | <a href="#">1756</a> | bi | 1 | <a href="#">1189</a> | bi | 1 | <a href="#">1116</a> | bi | 1 | <a href="#">1183</a> |
| 1 | <a href="#">1270</a> | 804 | bi | 1 | <a href="#">1758</a> | bi | 1 | <a href="#">1191</a> | bi | 1 | <a href="#">1117</a> | bi | 1 | <a href="#">1184</a> |
| 1 | <a href="#">1271</a> | 351 | bi | 1 | <a href="#">1759</a> | bi | 1 | <a href="#">1192</a> | bi | 1 | <a href="#">1118</a> | bi | 1 | <a href="#">1185</a> |
| 1 | <a href="#">1272</a> | 360 | bi | 1 | <a href="#">1760</a> | bi | 1 | <a href="#">1193</a> | bi | 1 | <a href="#">1119</a> | bi | 1 | <a href="#">1186</a> |
| 1 | <a href="#">1273</a> | 67  | bi | 1 | <a href="#">1761</a> | bi | 1 | <a href="#">1194</a> | bi | 1 | <a href="#">1120</a> | bi | 1 | <a href="#">1187</a> |
| 1 | <a href="#">1274</a> | 374 | bi | 1 | <a href="#">1762</a> | bi | 1 | <a href="#">1195</a> | bi | 1 | <a href="#">1121</a> | bi | 1 | <a href="#">1188</a> |
| 1 | <a href="#">1275</a> | 117 | bi | 1 | <a href="#">1764</a> | bi | 1 | <a href="#">1197</a> | bi | 1 | <a href="#">1122</a> | bi | 1 | <a href="#">1193</a> |
| 1 | <a href="#">1276</a> | 478 | bi | 1 | <a href="#">1765</a> | bi | 1 | <a href="#">1198</a> | bi | 1 | <a href="#">1123</a> | bi | 1 | <a href="#">1194</a> |
| 1 | <a href="#">1277</a> | 225 | bi | 1 | <a href="#">1766</a> | bi | 1 | <a href="#">1199</a> | bi | 1 | <a href="#">1124</a> | bi | 1 | <a href="#">1195</a> |
| 1 | <a href="#">1278</a> | 440 | bi | 1 | <a href="#">1767</a> | bi | 1 | <a href="#">1200</a> | bi | 1 | <a href="#">1125</a> | bi | 1 | <a href="#">1196</a> |
| 1 | <a href="#">1279</a> | 318 | bi | 1 | <a href="#">1768</a> | bi | 1 | <a href="#">1201</a> | bi | 1 | <a href="#">1126</a> | bi | 1 | <a href="#">1197</a> |
| 1 | <a href="#">1280</a> | 113 | bi | 1 | <a href="#">1769</a> | bi | 1 | <a href="#">1202</a> | bi | 1 | <a href="#">1127</a> | bi | 1 | <a href="#">1198</a> |
| 1 | <a href="#">1281</a> | 104 | bi | 1 | <a href="#">1770</a> | bi | 1 | <a href="#">1203</a> | bi | 1 | <a href="#">1128</a> | bi | 1 | <a href="#">1199</a> |
| 1 | <a href="#">1282</a> | 394 | bi | 1 | <a href="#">1771</a> | bi | 1 | <a href="#">1204</a> | bi | 1 | <a href="#">1129</a> | bi | 1 | <a href="#">1200</a> |
| 1 | <a href="#">1283</a> | 450 | bi | 1 | <a href="#">1772</a> | bi | 1 | <a href="#">1205</a> | bi | 1 | <a href="#">1130</a> | bi | 1 | <a href="#">1201</a> |
| 1 | <a href="#">1284</a> | 228 | bi | 1 | <a href="#">1773</a> | bi | 1 | <a href="#">1206</a> | bi | 1 | <a href="#">1131</a> | bi | 1 | <a href="#">1202</a> |
| 1 | <a href="#">1285</a> | 881 | bi | 1 | <a href="#">1774</a> | bi | 1 | <a href="#">1207</a> | bi | 1 | <a href="#">1132</a> | bi | 1 | <a href="#">1203</a> |
| 1 | <a href="#">1286</a> | 239 | bi | 1 | <a href="#">1775</a> | bi | 1 | <a href="#">1208</a> | bi | 1 | <a href="#">1133</a> | bi | 1 | <a href="#">1204</a> |
| 1 | <a href="#">1287</a> | 373 | bi | 1 | <a href="#">1776</a> | bi | 1 | <a href="#">1209</a> | bi | 1 | <a href="#">1134</a> | bi | 1 | <a href="#">1205</a> |
| 1 | <a href="#">1288</a> | 410 | bi | 1 | <a href="#">1777</a> | bi | 1 | <a href="#">1210</a> | bi | 1 | <a href="#">1135</a> | bi | 1 | <a href="#">1206</a> |
| 1 | <a href="#">1289</a> | 89  | bi | 1 | <a href="#">1778</a> | bi | 1 | <a href="#">1211</a> | bi | 1 | <a href="#">1136</a> | bi | 1 | <a href="#">1207</a> |
| 1 | <a href="#">1290</a> | 343 | bi | 1 | <a href="#">1779</a> | bi | 1 | <a href="#">1212</a> | bi | 1 | <a href="#">1137</a> | bi | 1 | <a href="#">1208</a> |
| 1 | <a href="#">1291</a> | 182 | bi | 1 | <a href="#">1780</a> | bi | 1 | <a href="#">1213</a> | bi | 1 | <a href="#">1138</a> | bi | 1 | <a href="#">1209</a> |
| 1 | <a href="#">1292</a> | 275 | bi | 1 | <a href="#">1781</a> | bi | 1 | <a href="#">1214</a> | bi | 1 | <a href="#">1139</a> | bi | 1 | <a href="#">1210</a> |
| 1 | <a href="#">1293</a> | 194 | bi | 1 | <a href="#">1782</a> | bi | 1 | <a href="#">1215</a> | bi | 1 | <a href="#">1140</a> | bi | 1 | <a href="#">1211</a> |
| 1 | <a href="#">1294</a> | 163 | bi | 1 | <a href="#">1783</a> | bi | 1 | <a href="#">1216</a> | bi | 1 | <a href="#">1141</a> | bi | 1 | <a href="#">1212</a> |
| 1 | <a href="#">1295</a> | 418 | bi | 1 | <a href="#">1784</a> | bi | 1 | <a href="#">1217</a> | bi | 1 | <a href="#">1142</a> | bi | 1 | <a href="#">1214</a> |
| 1 | <a href="#">1296</a> | 907 | bi | 1 | <a href="#">1785</a> | bi | 1 | <a href="#">1218</a> | bi | 1 | <a href="#">1143</a> | bi | 1 | <a href="#">1216</a> |
| 1 | <a href="#">1297</a> | 391 | bi | 1 | <a href="#">1786</a> | bi | 1 | <a href="#">1219</a> | bi | 1 | <a href="#">1144</a> | bi | 1 | <a href="#">1217</a> |
| 1 | <a href="#">1298</a> | 170 | bi | 1 | <a href="#">1787</a> | bi | 1 | <a href="#">1220</a> | bi | 1 | <a href="#">1145</a> | bi | 1 | <a href="#">1218</a> |
| 1 | <a href="#">1299</a> | 325 | bi | 1 | <a href="#">1788</a> | bi | 1 | <a href="#">1221</a> | bi | 1 | <a href="#">1146</a> | bi | 1 | <a href="#">1219</a> |
| 1 | <a href="#">1300</a> | 145 | bi | 1 | <a href="#">1789</a> | bi | 1 | <a href="#">1222</a> | bi | 1 | <a href="#">1147</a> | bi | 1 | <a href="#">1220</a> |
| 1 | <a href="#">1301</a> | 161 | bi | 1 | <a href="#">1790</a> | bi | 1 | <a href="#">1223</a> | bi | 1 | <a href="#">1148</a> | bi | 1 | <a href="#">1221</a> |
| 1 | <a href="#">1302</a> | 324 | bi | 1 | <a href="#">1791</a> | bi | 1 | <a href="#">1224</a> | bi | 1 | <a href="#">1149</a> | bi | 1 | <a href="#">1222</a> |
| 1 | <a href="#">1303</a> | 267 | bi | 1 | <a href="#">1792</a> | bi | 1 | <a href="#">1225</a> | bi | 1 | <a href="#">1150</a> | bi | 1 | <a href="#">1223</a> |
| 1 | <a href="#">1304</a> | 224 | bi | 1 | <a href="#">1793</a> | bi | 1 | <a href="#">1226</a> | bi | 1 | <a href="#">1151</a> | bi | 1 | <a href="#">1224</a> |
| 1 | <a href="#">1305</a> | 335 | bi | 1 | <a href="#">1794</a> | bi | 1 | <a href="#">1227</a> | bi | 1 | <a href="#">1152</a> | bi | 1 | <a href="#">1225</a> |
| 1 | <a href="#">1306</a> | 701 | bi | 1 | <a href="#">1795</a> | bi | 1 | <a href="#">1228</a> | bi | 1 | <a href="#">1153</a> | bi | 1 | <a href="#">1226</a> |
| 1 | <a href="#">1307</a> | 31  | -  |   |                      | -  |   |                      | -  |   |                      | -  |   |                      |
| 1 | <a href="#">1308</a> | 148 | bi | 1 | <a href="#">1796</a> | bi | 1 | <a href="#">1229</a> | bi | 1 | <a href="#">1154</a> | bi | 1 | <a href="#">1227</a> |
| 1 | <a href="#">1309</a> | 183 | bi | 1 | <a href="#">1797</a> | bi | 1 | <a href="#">1230</a> | bi | 1 | <a href="#">1155</a> | bi | 1 | <a href="#">1228</a> |
| 1 | <a href="#">1310</a> | 789 | bi | 1 | <a href="#">1798</a> | bi | 1 | <a href="#">1231</a> | bi | 1 | <a href="#">1156</a> | bi | 1 | <a href="#">1229</a> |
| 1 | <a href="#">1311</a> | 105 | bi | 1 | <a href="#">1799</a> | bi | 1 | <a href="#">1232</a> | bi | 1 | <a href="#">1157</a> | bi | 1 | <a href="#">1230</a> |
| 1 | <a href="#">1312</a> | 599 | bi | 1 | <a href="#">1800</a> | bi | 1 | <a href="#">1233</a> | bi | 1 | <a href="#">1158</a> | bi | 1 | <a href="#">1231</a> |
| 1 | <a href="#">1313</a> | 86  | bi | 1 | <a href="#">1801</a> | bi | 1 | <a href="#">1234</a> | bi | 1 | <a href="#">1159</a> | bi | 1 | <a href="#">1232</a> |

|   |                      |     |     |   |                      |     |   |                      |     |   |                      |     |   |                      |
|---|----------------------|-----|-----|---|----------------------|-----|---|----------------------|-----|---|----------------------|-----|---|----------------------|
| 1 | <a href="#">1314</a> | 300 | bi  | 1 | <a href="#">1802</a> | bi  | 1 | <a href="#">1235</a> | bi  | 1 | <a href="#">1160</a> | bi  | 1 | <a href="#">1233</a> |
| 1 | <a href="#">1315</a> | 421 | bi  | 1 | <a href="#">1803</a> | bi  | 1 | <a href="#">1236</a> | bi  | 1 | <a href="#">1161</a> | bi  | 1 | <a href="#">1234</a> |
| 1 | <a href="#">1316</a> | 333 | bi  | 1 | <a href="#">1804</a> | bi  | 1 | <a href="#">1237</a> | bi  | 1 | <a href="#">1162</a> | bi  | 1 | <a href="#">1235</a> |
| 1 | <a href="#">1317</a> | 465 | bi  | 1 | <a href="#">1805</a> | bi  | 1 | <a href="#">1238</a> | bi  | 1 | <a href="#">1163</a> | bi  | 1 | <a href="#">1236</a> |
| 1 | <a href="#">1318</a> | 145 | bi  | 1 | <a href="#">1806</a> | bi  | 1 | <a href="#">1239</a> | bi  | 1 | <a href="#">1164</a> | bi  | 1 | <a href="#">1237</a> |
| 1 | <a href="#">1319</a> | 483 | bi  | 1 | <a href="#">1807</a> | bi  | 1 | <a href="#">1240</a> | bi  | 1 | <a href="#">1165</a> | bi  | 1 | <a href="#">1238</a> |
| 1 | <a href="#">1320</a> | 388 | bi  | 1 | <a href="#">1808</a> | bi  | 1 | <a href="#">1241</a> | bi  | 1 | <a href="#">1166</a> | bi  | 1 | <a href="#">1239</a> |
| 1 | <a href="#">1321</a> | 449 | bi  | 1 | <a href="#">1809</a> | bi  | 1 | <a href="#">1242</a> | bi  | 1 | <a href="#">1167</a> | bi  | 1 | <a href="#">1240</a> |
| 1 | <a href="#">1322</a> | 450 | bi  | 1 | <a href="#">1810</a> | bi  | 1 | <a href="#">1243</a> | bi  | 1 | <a href="#">1168</a> | bi  | 1 | <a href="#">1241</a> |
| 1 | <a href="#">1323</a> | 409 | uni | 1 | <a href="#">2550</a> | uni | 1 | <a href="#">1710</a> | uni | 1 | <a href="#">1321</a> | uni | 1 | <a href="#">1546</a> |
| 1 | <a href="#">1324</a> | 94  | -   |   |                      | -   |   |                      | -   |   |                      | -   |   |                      |
| 1 | <a href="#">1325</a> | 198 | -   |   |                      | -   |   |                      | -   |   |                      | -   |   |                      |
| 1 | <a href="#">1326</a> | 251 | uni | 1 | <a href="#">2886</a> | uni | 1 | <a href="#">2431</a> | uni | 1 | <a href="#">2102</a> | uni | 1 | <a href="#">2259</a> |
| 1 | <a href="#">1327</a> | 155 | uni | 1 | <a href="#">1664</a> | bi  | 1 | <a href="#">2316</a> | uni | 1 | <a href="#">1014</a> | uni | 1 | <a href="#">1860</a> |
| 1 | <a href="#">1328</a> | 108 | uni | 1 | <a href="#">2343</a> | uni | 1 | <a href="#">248</a>  | uni | 1 | <a href="#">1122</a> | uni | 1 | <a href="#">2024</a> |
| 1 | <a href="#">1329</a> | 62  | -   |   |                      | -   |   |                      | -   |   |                      | -   |   |                      |
| 1 | <a href="#">1330</a> | 49  | -   |   |                      | -   |   |                      | -   |   |                      | -   |   |                      |
| 1 | <a href="#">1331</a> | 187 | -   |   |                      | -   |   |                      | -   |   |                      | -   |   |                      |
| 1 | <a href="#">1332</a> | 77  | -   |   |                      | -   |   |                      | -   |   |                      | -   |   |                      |
| 1 | <a href="#">1333</a> | 56  | -   |   |                      | -   |   |                      | -   |   |                      | -   |   |                      |
| 1 | <a href="#">1334</a> | 72  | bi  | 1 | <a href="#">1321</a> | bi  | 1 | <a href="#">1701</a> | -   |   |                      | -   |   |                      |
| 1 | <a href="#">1335</a> | 97  | -   |   |                      | -   |   |                      | -   |   |                      | -   |   |                      |
| 1 | <a href="#">1336</a> | 708 | -   |   |                      | -   |   |                      | -   |   |                      | -   |   |                      |
| 1 | <a href="#">1337</a> | 85  | -   |   |                      | -   |   |                      | -   |   |                      | -   |   |                      |
| 1 | <a href="#">1338</a> | 396 | -   |   |                      | -   |   |                      | -   |   |                      | -   |   |                      |
| 1 | <a href="#">1339</a> | 234 | uni | 1 | <a href="#">1587</a> | uni | 1 | <a href="#">1014</a> | uni | 1 | <a href="#">940</a>  | uni | 1 | <a href="#">1022</a> |
| 1 | <a href="#">1340</a> | 255 | uni | 1 | <a href="#">1549</a> | uni | 1 | <a href="#">976</a>  | uni | 1 | <a href="#">902</a>  | uni | 1 | <a href="#">982</a>  |
| 1 | <a href="#">1341</a> | 167 | uni | 1 | <a href="#">1543</a> | uni | 1 | <a href="#">971</a>  | uni | 1 | <a href="#">897</a>  | uni | 1 | <a href="#">976</a>  |
| 1 | <a href="#">1342</a> | 105 | -   |   |                      | -   |   |                      | -   |   |                      | -   |   |                      |
| 1 | <a href="#">1343</a> | 250 | uni | 3 | <a href="#">2938</a> | bi  | 1 | <a href="#">1690</a> | -   |   |                      | -   |   |                      |
| 1 | <a href="#">1344</a> | 76  | -   |   |                      | -   |   |                      | -   |   |                      | bi  | 1 | <a href="#">1525</a> |
| 1 | <a href="#">1345</a> | 76  | -   |   |                      | -   |   |                      | -   |   |                      | -   |   |                      |
| 1 | <a href="#">3306</a> | 142 | -   |   |                      | uni | 1 | <a href="#">2467</a> | -   |   |                      | bi  | 1 | <a href="#">1520</a> |
| 1 | <a href="#">1346</a> | 146 | -   |   |                      | bi  | 1 | <a href="#">2291</a> | -   |   |                      | uni | 1 | <a href="#">1520</a> |
| 1 | <a href="#">1347</a> | 113 | -   |   |                      | bi  | 1 | <a href="#">2290</a> | -   |   |                      | bi  | 1 | <a href="#">1519</a> |
| 1 | <a href="#">1348</a> | 118 | -   |   |                      | -   |   |                      | -   |   |                      | -   |   |                      |
| 1 | <a href="#">1349</a> | 196 | bi  | 1 | <a href="#">1338</a> | bi  | 1 | <a href="#">2287</a> | -   |   |                      | bi  | 1 | <a href="#">1518</a> |
| 1 | <a href="#">1350</a> | 162 | -   |   |                      | -   |   |                      | -   |   |                      | bi  | 1 | <a href="#">1841</a> |
| 1 | <a href="#">1351</a> | 106 | -   |   |                      | -   |   |                      | -   |   |                      | -   |   |                      |
| 1 | <a href="#">1352</a> | 69  | -   |   |                      | -   |   |                      | -   |   |                      | bi  | 1 | <a href="#">1517</a> |
| 1 | <a href="#">1353</a> | 60  | -   |   |                      | -   |   |                      | -   |   |                      | -   |   |                      |
| 1 | <a href="#">1354</a> | 37  | -   |   |                      | -   |   |                      | -   |   |                      | -   |   |                      |
| 1 | <a href="#">1355</a> | 60  | -   |   |                      | -   |   |                      | -   |   |                      | -   |   |                      |
| 1 | <a href="#">1356</a> | 195 | -   |   |                      | -   |   |                      | -   |   |                      | -   |   |                      |
| 1 | <a href="#">1357</a> | 90  | -   |   |                      | -   |   |                      | -   |   |                      | -   |   |                      |
| 1 | <a href="#">1358</a> | 423 | bi  | 1 | <a href="#">1341</a> | uni | 3 | <a href="#">3006</a> | -   |   |                      | bi  | 1 | <a href="#">1835</a> |
| 1 | <a href="#">1359</a> | 77  | bi  | 1 | <a href="#">1343</a> | -   |   |                      | -   |   |                      | bi  | 1 | <a href="#">1833</a> |
| 1 | <a href="#">1360</a> | 242 | -   |   |                      | -   |   |                      | -   |   |                      | -   |   |                      |
| 1 | <a href="#">1361</a> | 479 | -   |   |                      | -   |   |                      | -   |   |                      | -   |   |                      |
| 1 | <a href="#">1362</a> | 465 | -   |   |                      | -   |   |                      | -   |   |                      | -   |   |                      |
| 1 | <a href="#">1363</a> | 415 | -   |   |                      | -   |   |                      | -   |   |                      | -   |   |                      |
| 1 | <a href="#">1364</a> | 55  | -   |   |                      | -   |   |                      | -   |   |                      | -   |   |                      |
| 1 | <a href="#">1365</a> | 96  | -   |   |                      | -   |   |                      | -   |   |                      | -   |   |                      |
| 1 | <a href="#">1366</a> | 70  | -   |   |                      | -   |   |                      | -   |   |                      | -   |   |                      |
| 1 | <a href="#">1367</a> | 367 | -   |   |                      | -   |   |                      | -   |   |                      | -   |   |                      |
| 1 | <a href="#">1368</a> | 157 | -   |   |                      | -   |   |                      | -   |   |                      | -   |   |                      |
| 1 | <a href="#">1369</a> | 294 | -   |   |                      | -   |   |                      | -   |   |                      | -   |   |                      |

|   |                      |      |     |   |                      |     |   |                      |     |   |                      |     |   |                      |
|---|----------------------|------|-----|---|----------------------|-----|---|----------------------|-----|---|----------------------|-----|---|----------------------|
| 1 | <a href="#">1370</a> | 129  | -   |   |                      | -   |   |                      | -   |   |                      | -   |   |                      |
| 1 | <a href="#">1371</a> | 114  | -   |   |                      | -   |   |                      | -   |   |                      | -   |   |                      |
| 1 | <a href="#">1372</a> | 202  | -   |   |                      | -   |   |                      | -   |   |                      | -   |   |                      |
| 1 | <a href="#">1373</a> | 120  | -   |   |                      | -   |   |                      | -   |   |                      | -   |   |                      |
| 1 | <a href="#">1374</a> | 159  | -   |   |                      | -   |   |                      | -   |   |                      | -   |   |                      |
| 1 | <a href="#">1375</a> | 346  | -   |   |                      | -   |   |                      | -   |   |                      | -   |   |                      |
| 1 | <a href="#">1376</a> | 133  | -   |   |                      | -   |   |                      | -   |   |                      | -   |   |                      |
| 1 | <a href="#">1377</a> | 111  | -   |   |                      | -   |   |                      | -   |   |                      | -   |   |                      |
| 1 | <a href="#">1378</a> | 67   | -   |   |                      | -   |   |                      | -   |   |                      | -   |   |                      |
| 1 | <a href="#">1379</a> | 1722 | -   |   |                      | -   |   |                      | -   |   |                      | -   |   |                      |
| 1 | <a href="#">1380</a> | 186  | -   |   |                      | -   |   |                      | -   |   |                      | -   |   |                      |
| 1 | <a href="#">1381</a> | 121  | -   |   |                      | -   |   |                      | -   |   |                      | -   |   |                      |
| 1 | <a href="#">1382</a> | 277  | -   |   |                      | -   |   |                      | -   |   |                      | -   |   |                      |
| 1 | <a href="#">1383</a> | 111  | -   |   |                      | -   |   |                      | -   |   |                      | -   |   |                      |
| 1 | <a href="#">1384</a> | 116  | -   |   |                      | -   |   |                      | -   |   |                      | -   |   |                      |
| 1 | <a href="#">1385</a> | 385  | -   |   |                      | -   |   |                      | -   |   |                      | -   |   |                      |
| 1 | <a href="#">1386</a> | 210  | -   |   |                      | -   |   |                      | -   |   |                      | -   |   |                      |
| 1 | <a href="#">1387</a> | 548  | uni | 1 | <a href="#">1678</a> | uni | 1 | <a href="#">1104</a> | uni | 1 | <a href="#">1028</a> | uni | 1 | <a href="#">1109</a> |
| 1 | <a href="#">1388</a> | 145  | uni | 1 | <a href="#">1364</a> | uni | 1 | <a href="#">1660</a> | -   |   |                      | -   |   |                      |
| 1 | <a href="#">1389</a> | 43   | bi  | 1 | <a href="#">1365</a> | uni | 1 | <a href="#">1659</a> | -   |   |                      | -   |   |                      |
| 1 | <a href="#">1390</a> | 119  | -   |   |                      | -   |   |                      | -   |   |                      | -   |   |                      |
| 1 | <a href="#">1391</a> | 66   | -   |   |                      | -   |   |                      | -   |   |                      | -   |   |                      |
| 1 | <a href="#">1392</a> | 369  | bi  | 1 | <a href="#">1367</a> | bi  | 1 | <a href="#">2261</a> | uni | 1 | <a href="#">1030</a> | uni | 1 | <a href="#">1111</a> |
| 1 | <a href="#">1393</a> | 135  | -   |   |                      | -   |   |                      | -   |   |                      | -   |   |                      |
| 1 | <a href="#">1394</a> | 388  | -   |   |                      | -   |   |                      | -   |   |                      | -   |   |                      |
| 1 | <a href="#">1395</a> | 83   | -   |   |                      | bi  | 1 | <a href="#">2257</a> | -   |   |                      | -   |   |                      |
| 1 | <a href="#">1396</a> | 60   | bi  | 1 | <a href="#">1811</a> | bi  | 1 | <a href="#">1244</a> | bi  | 1 | <a href="#">1169</a> | bi  | 1 | <a href="#">1242</a> |
| 1 | <a href="#">1397</a> | 148  | bi  | 1 | <a href="#">1812</a> | bi  | 1 | <a href="#">1245</a> | bi  | 1 | <a href="#">1170</a> | bi  | 1 | <a href="#">1243</a> |
| 1 | <a href="#">1398</a> | 108  | bi  | 1 | <a href="#">1813</a> | bi  | 1 | <a href="#">1246</a> | bi  | 1 | <a href="#">1171</a> | bi  | 1 | <a href="#">1244</a> |
| 1 | <a href="#">1399</a> | 660  | bi  | 1 | <a href="#">1814</a> | bi  | 1 | <a href="#">1247</a> | bi  | 1 | <a href="#">1172</a> | bi  | 1 | <a href="#">1245</a> |
| 1 | <a href="#">1400</a> | 158  | bi  | 1 | <a href="#">1815</a> | bi  | 1 | <a href="#">1248</a> | bi  | 1 | <a href="#">1173</a> | bi  | 1 | <a href="#">1246</a> |
| 1 | <a href="#">1401</a> | 194  | bi  | 1 | <a href="#">1816</a> | bi  | 1 | <a href="#">1249</a> | bi  | 1 | <a href="#">1174</a> | bi  | 1 | <a href="#">1247</a> |
| 1 | <a href="#">1402</a> | 334  | bi  | 1 | <a href="#">1817</a> | bi  | 1 | <a href="#">1250</a> | bi  | 1 | <a href="#">1175</a> | bi  | 1 | <a href="#">1248</a> |
| 1 | <a href="#">1403</a> | 104  | bi  | 1 | <a href="#">1818</a> | bi  | 1 | <a href="#">1251</a> | bi  | 1 | <a href="#">1176</a> | bi  | 1 | <a href="#">1249</a> |
| 1 | <a href="#">1404</a> | 596  | bi  | 1 | <a href="#">1819</a> | bi  | 1 | <a href="#">1252</a> | bi  | 1 | <a href="#">1177</a> | bi  | 1 | <a href="#">1250</a> |
| 1 | <a href="#">1405</a> | 459  | bi  | 1 | <a href="#">1820</a> | bi  | 1 | <a href="#">1253</a> | bi  | 1 | <a href="#">1178</a> | bi  | 1 | <a href="#">1251</a> |
| 1 | <a href="#">1406</a> | 212  | bi  | 1 | <a href="#">1821</a> | bi  | 1 | <a href="#">1254</a> | bi  | 1 | <a href="#">1179</a> | bi  | 1 | <a href="#">1252</a> |
| 1 | <a href="#">1407</a> | 107  | bi  | 1 | <a href="#">1822</a> | bi  | 1 | <a href="#">1255</a> | bi  | 1 | <a href="#">1180</a> | bi  | 1 | <a href="#">1253</a> |
| 1 | <a href="#">1408</a> | 314  | bi  | 1 | <a href="#">1825</a> | bi  | 1 | <a href="#">1258</a> | bi  | 1 | <a href="#">1183</a> | bi  | 1 | <a href="#">1256</a> |
| 1 | <a href="#">1409</a> | 627  | bi  | 1 | <a href="#">1826</a> | bi  | 1 | <a href="#">1259</a> | bi  | 1 | <a href="#">1184</a> | bi  | 1 | <a href="#">1257</a> |
| 1 | <a href="#">1410</a> | 431  | bi  | 1 | <a href="#">1827</a> | bi  | 1 | <a href="#">1260</a> | bi  | 1 | <a href="#">1185</a> | bi  | 1 | <a href="#">1258</a> |
| 1 | <a href="#">1411</a> | 333  | bi  | 1 | <a href="#">1828</a> | bi  | 1 | <a href="#">1261</a> | bi  | 1 | <a href="#">1186</a> | bi  | 1 | <a href="#">1259</a> |
| 1 | <a href="#">1412</a> | 178  | bi  | 1 | <a href="#">1829</a> | bi  | 1 | <a href="#">1262</a> | bi  | 1 | <a href="#">1187</a> | bi  | 1 | <a href="#">1260</a> |
| 1 | <a href="#">1413</a> | 128  | uni | 1 | <a href="#">1830</a> | uni | 1 | <a href="#">1263</a> | uni | 1 | <a href="#">1188</a> | bi  | 1 | <a href="#">1261</a> |
| 1 | <a href="#">1414</a> | 161  | bi  | 1 | <a href="#">1830</a> | bi  | 1 | <a href="#">1263</a> | bi  | 1 | <a href="#">1188</a> | uni | 1 | <a href="#">1261</a> |
| 1 | <a href="#">1415</a> | 180  | bi  | 1 | <a href="#">1831</a> | bi  | 1 | <a href="#">1264</a> | bi  | 1 | <a href="#">1189</a> | bi  | 1 | <a href="#">1262</a> |
| 1 | <a href="#">1416</a> | 115  | bi  | 1 | <a href="#">1832</a> | bi  | 1 | <a href="#">1265</a> | bi  | 1 | <a href="#">1190</a> | bi  | 1 | <a href="#">1263</a> |
| 1 | <a href="#">1417</a> | 355  | bi  | 1 | <a href="#">1833</a> | bi  | 1 | <a href="#">1266</a> | bi  | 1 | <a href="#">1191</a> | bi  | 1 | <a href="#">1264</a> |
| 1 | <a href="#">1418</a> | 459  | bi  | 1 | <a href="#">1834</a> | bi  | 1 | <a href="#">1267</a> | bi  | 1 | <a href="#">1192</a> | bi  | 1 | <a href="#">1265</a> |
| 1 | <a href="#">1419</a> | 551  | bi  | 1 | <a href="#">1835</a> | bi  | 1 | <a href="#">1268</a> | bi  | 1 | <a href="#">1193</a> | bi  | 1 | <a href="#">1266</a> |
| 1 | <a href="#">1420</a> | 278  | bi  | 1 | <a href="#">1836</a> | bi  | 1 | <a href="#">1269</a> | bi  | 1 | <a href="#">1194</a> | bi  | 1 | <a href="#">1267</a> |
| 1 | <a href="#">1421</a> | 666  | bi  | 1 | <a href="#">1837</a> | bi  | 1 | <a href="#">1270</a> | bi  | 1 | <a href="#">1195</a> | bi  | 1 | <a href="#">1268</a> |
| 1 | <a href="#">1422</a> | 49   | bi  | 1 | <a href="#">1844</a> | bi  | 1 | <a href="#">1277</a> | bi  | 1 | <a href="#">1202</a> | bi  | 1 | <a href="#">1275</a> |
| 1 | <a href="#">1423</a> | 210  | bi  | 1 | <a href="#">1845</a> | bi  | 1 | <a href="#">1278</a> | bi  | 1 | <a href="#">1203</a> | bi  | 1 | <a href="#">1276</a> |
| 1 | <a href="#">1424</a> | 779  | bi  | 1 | <a href="#">1846</a> | bi  | 1 | <a href="#">1279</a> | bi  | 1 | <a href="#">1204</a> | bi  | 1 | <a href="#">1277</a> |
| 1 | <a href="#">1425</a> | 629  | bi  | 1 | <a href="#">1847</a> | bi  | 1 | <a href="#">1280</a> | bi  | 1 | <a href="#">1205</a> | bi  | 1 | <a href="#">1278</a> |
| 1 | <a href="#">1426</a> | 369  | bi  | 1 | <a href="#">1848</a> | bi  | 1 | <a href="#">1281</a> | bi  | 1 | <a href="#">1206</a> | bi  | 1 | <a href="#">1279</a> |

|   |                      |     |    |   |                      |    |   |                      |    |   |                      |    |   |                      |
|---|----------------------|-----|----|---|----------------------|----|---|----------------------|----|---|----------------------|----|---|----------------------|
| 1 | <a href="#">1427</a> | 692 | bi | 1 | <a href="#">1849</a> | bi | 1 | <a href="#">1282</a> | bi | 1 | <a href="#">1207</a> | bi | 1 | <a href="#">1280</a> |
| 1 | <a href="#">1428</a> | 294 | bi | 1 | <a href="#">1850</a> | bi | 1 | <a href="#">1283</a> | bi | 1 | <a href="#">1208</a> | bi | 1 | <a href="#">1281</a> |
| 1 | <a href="#">1429</a> | 150 | bi | 1 | <a href="#">1851</a> | bi | 1 | <a href="#">1284</a> | bi | 1 | <a href="#">1209</a> | bi | 1 | <a href="#">1282</a> |
| 1 | <a href="#">1430</a> | 337 | bi | 1 | <a href="#">1852</a> | bi | 1 | <a href="#">1285</a> | bi | 1 | <a href="#">1210</a> | bi | 1 | <a href="#">1283</a> |
| 1 | <a href="#">1431</a> | 439 | bi | 1 | <a href="#">1853</a> | bi | 1 | <a href="#">1286</a> | bi | 1 | <a href="#">1211</a> | bi | 1 | <a href="#">1284</a> |
| 1 | <a href="#">1432</a> | 101 | bi | 1 | <a href="#">1854</a> | bi | 1 | <a href="#">1287</a> | bi | 1 | <a href="#">1212</a> | bi | 1 | <a href="#">1285</a> |
| 1 | <a href="#">1433</a> | 433 | bi | 1 | <a href="#">1855</a> | bi | 1 | <a href="#">1288</a> | bi | 1 | <a href="#">1213</a> | bi | 1 | <a href="#">1286</a> |
| 1 | <a href="#">1434</a> | 180 | bi | 1 | <a href="#">1856</a> | bi | 1 | <a href="#">1289</a> | bi | 1 | <a href="#">1214</a> | bi | 1 | <a href="#">1287</a> |
| 1 | <a href="#">1435</a> | 48  | -  |   |                      | -  |   |                      | -  |   |                      | -  |   |                      |
| 1 | <a href="#">1436</a> | 126 | bi | 1 | <a href="#">1857</a> | bi | 1 | <a href="#">1290</a> | bi | 1 | <a href="#">1215</a> | bi | 1 | <a href="#">1290</a> |
| 1 | <a href="#">1437</a> | 250 | bi | 1 | <a href="#">1858</a> | bi | 1 | <a href="#">1291</a> | bi | 1 | <a href="#">1216</a> | bi | 1 | <a href="#">1291</a> |
| 1 | <a href="#">1438</a> | 364 | bi | 1 | <a href="#">1859</a> | bi | 1 | <a href="#">1292</a> | bi | 1 | <a href="#">1217</a> | bi | 1 | <a href="#">1292</a> |
| 1 | <a href="#">1439</a> | 310 | bi | 1 | <a href="#">1860</a> | bi | 1 | <a href="#">1293</a> | bi | 1 | <a href="#">1218</a> | bi | 1 | <a href="#">1293</a> |
| 1 | <a href="#">1440</a> | 297 | bi | 1 | <a href="#">1861</a> | bi | 1 | <a href="#">1294</a> | bi | 1 | <a href="#">1219</a> | bi | 1 | <a href="#">1294</a> |
| 1 | <a href="#">1441</a> | 265 | bi | 1 | <a href="#">1862</a> | bi | 1 | <a href="#">1295</a> | bi | 1 | <a href="#">1220</a> | bi | 1 | <a href="#">1295</a> |
| 1 | <a href="#">1442</a> | 202 | bi | 1 | <a href="#">1863</a> | bi | 1 | <a href="#">1296</a> | bi | 1 | <a href="#">1221</a> | bi | 1 | <a href="#">1296</a> |
| 1 | <a href="#">3307</a> | 239 | bi | 1 | <a href="#">1864</a> | bi | 1 | <a href="#">1297</a> | bi | 1 | <a href="#">1222</a> | bi | 1 | <a href="#">1297</a> |
| 1 | <a href="#">1443</a> | 202 | bi | 1 | <a href="#">1865</a> | bi | 1 | <a href="#">1298</a> | bi | 1 | <a href="#">1223</a> | bi | 1 | <a href="#">1298</a> |
| 1 | <a href="#">1444</a> | 469 | bi | 1 | <a href="#">1866</a> | bi | 1 | <a href="#">1299</a> | bi | 1 | <a href="#">1224</a> | bi | 1 | <a href="#">1299</a> |
| 1 | <a href="#">1445</a> | 77  | bi | 1 | <a href="#">1867</a> | -  |   |                      | bi | 1 | <a href="#">1225</a> | bi | 1 | <a href="#">1300</a> |
| 1 | <a href="#">1446</a> | 345 | bi | 1 | <a href="#">1868</a> | bi | 1 | <a href="#">1300</a> | bi | 1 | <a href="#">1226</a> | bi | 1 | <a href="#">1301</a> |
| 1 | <a href="#">1447</a> | 481 | bi | 1 | <a href="#">1869</a> | bi | 1 | <a href="#">1301</a> | bi | 1 | <a href="#">1227</a> | bi | 1 | <a href="#">1302</a> |
| 1 | <a href="#">1448</a> | 209 | bi | 1 | <a href="#">1870</a> | bi | 1 | <a href="#">1302</a> | bi | 1 | <a href="#">1228</a> | bi | 1 | <a href="#">1303</a> |
| 1 | <a href="#">1449</a> | 227 | bi | 1 | <a href="#">1871</a> | bi | 1 | <a href="#">1303</a> | bi | 1 | <a href="#">1229</a> | bi | 1 | <a href="#">1304</a> |
| 1 | <a href="#">1450</a> | 404 | bi | 1 | <a href="#">1872</a> | bi | 1 | <a href="#">1304</a> | bi | 1 | <a href="#">1230</a> | bi | 1 | <a href="#">1305</a> |
| 1 | <a href="#">1451</a> | 437 | bi | 1 | <a href="#">1873</a> | bi | 1 | <a href="#">1305</a> | bi | 1 | <a href="#">1231</a> | bi | 1 | <a href="#">1306</a> |
| 1 | <a href="#">1452</a> | 92  | bi | 1 | <a href="#">1874</a> | bi | 1 | <a href="#">1306</a> | bi | 1 | <a href="#">1232</a> | bi | 1 | <a href="#">1307</a> |
| 1 | <a href="#">1453</a> | 37  | -  |   |                      | -  |   |                      | -  |   |                      | -  |   |                      |
| 1 | <a href="#">1454</a> | 347 | bi | 1 | <a href="#">1875</a> | bi | 1 | <a href="#">1307</a> | bi | 1 | <a href="#">1233</a> | bi | 1 | <a href="#">1308</a> |
| 1 | <a href="#">1455</a> | 398 | bi | 1 | <a href="#">1876</a> | bi | 1 | <a href="#">1308</a> | bi | 1 | <a href="#">1234</a> | bi | 1 | <a href="#">1309</a> |
| 1 | <a href="#">1456</a> | 180 | bi | 1 | <a href="#">1877</a> | bi | 1 | <a href="#">1309</a> | bi | 1 | <a href="#">1235</a> | bi | 1 | <a href="#">1310</a> |
| 1 | <a href="#">1457</a> | 295 | bi | 1 | <a href="#">1878</a> | bi | 1 | <a href="#">1310</a> | bi | 1 | <a href="#">1236</a> | bi | 1 | <a href="#">1311</a> |
| 1 | <a href="#">1458</a> | 117 | bi | 1 | <a href="#">1879</a> | bi | 1 | <a href="#">1311</a> | bi | 1 | <a href="#">1237</a> | bi | 1 | <a href="#">1312</a> |
| 1 | <a href="#">1459</a> | 260 | bi | 1 | <a href="#">1880</a> | bi | 1 | <a href="#">1312</a> | bi | 1 | <a href="#">1238</a> | bi | 1 | <a href="#">1313</a> |
| 1 | <a href="#">1460</a> | 407 | bi | 1 | <a href="#">1881</a> | bi | 1 | <a href="#">1313</a> | bi | 1 | <a href="#">1239</a> | bi | 1 | <a href="#">1314</a> |
| 1 | <a href="#">1461</a> | 125 | bi | 1 | <a href="#">1883</a> | bi | 1 | <a href="#">1315</a> | bi | 1 | <a href="#">1240</a> | bi | 1 | <a href="#">1315</a> |
| 1 | <a href="#">1462</a> | 152 | bi | 1 | <a href="#">1884</a> | bi | 1 | <a href="#">1316</a> | bi | 1 | <a href="#">1241</a> | bi | 1 | <a href="#">1316</a> |
| 1 | <a href="#">1463</a> | 289 | bi | 1 | <a href="#">1885</a> | bi | 1 | <a href="#">1317</a> | bi | 1 | <a href="#">1242</a> | bi | 1 | <a href="#">1317</a> |
| 1 | <a href="#">1464</a> | 342 | bi | 1 | <a href="#">1886</a> | bi | 1 | <a href="#">1318</a> | bi | 1 | <a href="#">1243</a> | bi | 1 | <a href="#">1318</a> |
| 1 | <a href="#">1465</a> | 359 | bi | 1 | <a href="#">1887</a> | bi | 1 | <a href="#">1319</a> | bi | 1 | <a href="#">1244</a> | bi | 1 | <a href="#">1319</a> |
| 1 | <a href="#">1466</a> | 389 | bi | 1 | <a href="#">1888</a> | bi | 1 | <a href="#">1320</a> | bi | 1 | <a href="#">1245</a> | bi | 1 | <a href="#">1320</a> |
| 1 | <a href="#">1467</a> | 365 | bi | 1 | <a href="#">1889</a> | bi | 1 | <a href="#">1321</a> | bi | 1 | <a href="#">1246</a> | bi | 1 | <a href="#">1321</a> |
| 1 | <a href="#">1468</a> | 429 | bi | 1 | <a href="#">1890</a> | bi | 1 | <a href="#">1322</a> | bi | 1 | <a href="#">1247</a> | bi | 1 | <a href="#">1322</a> |
| 1 | <a href="#">1469</a> | 169 | bi | 1 | <a href="#">1891</a> | bi | 1 | <a href="#">1323</a> | bi | 1 | <a href="#">1248</a> | bi | 1 | <a href="#">1323</a> |
| 1 | <a href="#">1470</a> | 283 | bi | 1 | <a href="#">1892</a> | bi | 1 | <a href="#">1324</a> | bi | 1 | <a href="#">1249</a> | bi | 1 | <a href="#">1324</a> |
| 1 | <a href="#">1471</a> | 391 | bi | 1 | <a href="#">1893</a> | bi | 1 | <a href="#">1325</a> | bi | 1 | <a href="#">1250</a> | bi | 1 | <a href="#">1325</a> |
| 1 | <a href="#">1472</a> | 283 | bi | 1 | <a href="#">1894</a> | bi | 1 | <a href="#">1326</a> | bi | 1 | <a href="#">1251</a> | bi | 1 | <a href="#">1326</a> |
| 1 | <a href="#">1473</a> | 65  | bi | 1 | <a href="#">1895</a> | bi | 1 | <a href="#">1327</a> | bi | 1 | <a href="#">1252</a> | bi | 1 | <a href="#">1327</a> |
| 1 | <a href="#">1474</a> | 159 | bi | 1 | <a href="#">1896</a> | bi | 1 | <a href="#">1328</a> | bi | 1 | <a href="#">1253</a> | bi | 1 | <a href="#">1328</a> |
| 1 | <a href="#">1475</a> | 111 | bi | 1 | <a href="#">1897</a> | bi | 1 | <a href="#">1329</a> | bi | 1 | <a href="#">1254</a> | bi | 1 | <a href="#">1329</a> |
| 1 | <a href="#">1476</a> | 685 | bi | 1 | <a href="#">1898</a> | bi | 1 | <a href="#">1330</a> | bi | 1 | <a href="#">1255</a> | bi | 1 | <a href="#">1330</a> |
| 1 | <a href="#">1477</a> | 632 | bi | 1 | <a href="#">1899</a> | bi | 1 | <a href="#">1331</a> | bi | 1 | <a href="#">1256</a> | bi | 1 | <a href="#">1331</a> |
| 1 | <a href="#">1478</a> | 316 | bi | 1 | <a href="#">1900</a> | bi | 1 | <a href="#">1332</a> | bi | 1 | <a href="#">1257</a> | bi | 1 | <a href="#">1332</a> |
| 1 | <a href="#">1479</a> | 165 | bi | 1 | <a href="#">1901</a> | bi | 1 | <a href="#">1333</a> | bi | 1 | <a href="#">1258</a> | bi | 1 | <a href="#">1333</a> |
| 1 | <a href="#">1480</a> | 390 | bi | 1 | <a href="#">1902</a> | bi | 1 | <a href="#">1334</a> | bi | 1 | <a href="#">1259</a> | bi | 1 | <a href="#">1334</a> |
| 1 | <a href="#">1481</a> | 210 | bi | 1 | <a href="#">1903</a> | bi | 1 | <a href="#">1335</a> | bi | 1 | <a href="#">1260</a> | bi | 1 | <a href="#">1335</a> |
| 1 | <a href="#">1482</a> | 81  | bi | 1 | <a href="#">1904</a> | bi | 1 | <a href="#">1336</a> | bi | 1 | <a href="#">1261</a> | bi | 1 | <a href="#">1336</a> |



|   |                      |     |     |   |                      |     |   |                      |     |   |                      |     |   |                      |
|---|----------------------|-----|-----|---|----------------------|-----|---|----------------------|-----|---|----------------------|-----|---|----------------------|
| 1 | <a href="#">3308</a> | 592 | bi  | 1 | <a href="#">1905</a> | bi  | 1 | <a href="#">1337</a> | bi  | 1 | <a href="#">1262</a> | bi  | 1 | <a href="#">1337</a> |
| 1 | <a href="#">3309</a> | 64  | -   |   |                      | -   |   |                      | -   |   |                      | -   |   |                      |
| 1 | <a href="#">1483</a> | 397 | bi  | 1 | <a href="#">1906</a> | bi  | 1 | <a href="#">1338</a> | bi  | 1 | <a href="#">1263</a> | bi  | 1 | <a href="#">1338</a> |
| 1 | <a href="#">1484</a> | 287 | bi  | 1 | <a href="#">1907</a> | bi  | 1 | <a href="#">1339</a> | bi  | 1 | <a href="#">1264</a> | bi  | 1 | <a href="#">1339</a> |
| 1 | <a href="#">1485</a> | 311 | bi  | 1 | <a href="#">1908</a> | bi  | 1 | <a href="#">1340</a> | bi  | 1 | <a href="#">1265</a> | bi  | 1 | <a href="#">1340</a> |
| 1 | <a href="#">1486</a> | 148 | bi  | 1 | <a href="#">1909</a> | bi  | 1 | <a href="#">1341</a> | bi  | 1 | <a href="#">1266</a> | bi  | 1 | <a href="#">1341</a> |
| 1 | <a href="#">1487</a> | 447 | bi  | 1 | <a href="#">1910</a> | bi  | 1 | <a href="#">1342</a> | bi  | 1 | <a href="#">1267</a> | bi  | 1 | <a href="#">1342</a> |
| 1 | <a href="#">1488</a> | 191 | bi  | 1 | <a href="#">1911</a> | bi  | 1 | <a href="#">1343</a> | bi  | 1 | <a href="#">1268</a> | bi  | 1 | <a href="#">1343</a> |
| 1 | <a href="#">1489</a> | 167 | -   |   |                      | -   |   |                      | bi  | 1 | <a href="#">1269</a> | bi  | 1 | <a href="#">1344</a> |
| 1 | <a href="#">1490</a> | 176 | bi  | 1 | <a href="#">1912</a> | bi  | 1 | <a href="#">1344</a> | bi  | 1 | <a href="#">1270</a> | bi  | 1 | <a href="#">1345</a> |
| 1 | <a href="#">1491</a> | 273 | bi  | 1 | <a href="#">1913</a> | bi  | 1 | <a href="#">1345</a> | bi  | 1 | <a href="#">1271</a> | bi  | 1 | <a href="#">1346</a> |
| 1 | <a href="#">1492</a> | 583 | bi  | 1 | <a href="#">1914</a> | bi  | 1 | <a href="#">1346</a> | bi  | 1 | <a href="#">1272</a> | bi  | 1 | <a href="#">1347</a> |
| 1 | <a href="#">1493</a> | 593 | bi  | 1 | <a href="#">1915</a> | bi  | 1 | <a href="#">1347</a> | bi  | 1 | <a href="#">1273</a> | bi  | 1 | <a href="#">1348</a> |
| 1 | <a href="#">1494</a> | 35  | -   |   |                      | -   |   |                      | -   |   |                      | -   |   |                      |
| 1 | <a href="#">1495</a> | 142 | bi  | 1 | <a href="#">1916</a> | bi  | 1 | <a href="#">1348</a> | bi  | 1 | <a href="#">1274</a> | bi  | 1 | <a href="#">1349</a> |
| 1 | <a href="#">1496</a> | 337 | bi  | 1 | <a href="#">1917</a> | bi  | 1 | <a href="#">1349</a> | bi  | 1 | <a href="#">1275</a> | bi  | 1 | <a href="#">1350</a> |
| 1 | <a href="#">1497</a> | 479 | bi  | 1 | <a href="#">1918</a> | bi  | 1 | <a href="#">1350</a> | bi  | 1 | <a href="#">1276</a> | bi  | 1 | <a href="#">1352</a> |
| 1 | <a href="#">1498</a> | 478 | bi  | 1 | <a href="#">1919</a> | bi  | 1 | <a href="#">1351</a> | bi  | 1 | <a href="#">1277</a> | bi  | 1 | <a href="#">1353</a> |
| 1 | <a href="#">1499</a> | 282 | bi  | 1 | <a href="#">1920</a> | bi  | 1 | <a href="#">1352</a> | bi  | 1 | <a href="#">1278</a> | bi  | 1 | <a href="#">1354</a> |
| 1 | <a href="#">1500</a> | 643 | bi  | 1 | <a href="#">1921</a> | bi  | 1 | <a href="#">1353</a> | bi  | 1 | <a href="#">1279</a> | bi  | 1 | <a href="#">1355</a> |
| 1 | <a href="#">1501</a> | 558 | bi  | 1 | <a href="#">1922</a> | bi  | 1 | <a href="#">1354</a> | bi  | 1 | <a href="#">1280</a> | bi  | 1 | <a href="#">1356</a> |
| 1 | <a href="#">1502</a> | 487 | bi  | 1 | <a href="#">1923</a> | bi  | 1 | <a href="#">1355</a> | bi  | 1 | <a href="#">1281</a> | bi  | 1 | <a href="#">1357</a> |
| 1 | <a href="#">1503</a> | 327 | bi  | 1 | <a href="#">1924</a> | bi  | 1 | <a href="#">1356</a> | bi  | 1 | <a href="#">1282</a> | bi  | 1 | <a href="#">1358</a> |
| 1 | <a href="#">1504</a> | 54  | bi  | 1 | <a href="#">1925</a> | bi  | 1 | <a href="#">1357</a> | -   |   |                      | bi  | 1 | <a href="#">1359</a> |
| 1 | <a href="#">1505</a> | 470 | bi  | 1 | <a href="#">1926</a> | bi  | 1 | <a href="#">1358</a> | bi  | 1 | <a href="#">1283</a> | bi  | 1 | <a href="#">1360</a> |
| 1 | <a href="#">3310</a> | 200 | uni | 1 | <a href="#">1927</a> | uni | 1 | <a href="#">1359</a> | uni | 1 | <a href="#">1284</a> | uni | 1 | <a href="#">1361</a> |
| 1 | <a href="#">3311</a> | 443 | bi  | 1 | <a href="#">1927</a> | bi  | 1 | <a href="#">1359</a> | bi  | 1 | <a href="#">1284</a> | bi  | 1 | <a href="#">1361</a> |
| 1 | <a href="#">1506</a> | 487 | bi  | 1 | <a href="#">1935</a> | bi  | 1 | <a href="#">1360</a> | bi  | 1 | <a href="#">1285</a> | bi  | 1 | <a href="#">1368</a> |
| 1 | <a href="#">1507</a> | 184 | bi  | 1 | <a href="#">1936</a> | bi  | 1 | <a href="#">1361</a> | bi  | 1 | <a href="#">1286</a> | bi  | 1 | <a href="#">1369</a> |
| 1 | <a href="#">1508</a> | 295 | bi  | 1 | <a href="#">1937</a> | bi  | 1 | <a href="#">1362</a> | bi  | 1 | <a href="#">1287</a> | bi  | 1 | <a href="#">1370</a> |
| 1 | <a href="#">1509</a> | 309 | bi  | 1 | <a href="#">1938</a> | bi  | 1 | <a href="#">1363</a> | bi  | 1 | <a href="#">1288</a> | bi  | 1 | <a href="#">1371</a> |
| 1 | <a href="#">1510</a> | 255 | bi  | 1 | <a href="#">1939</a> | bi  | 1 | <a href="#">1364</a> | bi  | 1 | <a href="#">1289</a> | bi  | 1 | <a href="#">1372</a> |
| 1 | <a href="#">1511</a> | 749 | bi  | 1 | <a href="#">1940</a> | bi  | 1 | <a href="#">1365</a> | bi  | 1 | <a href="#">1290</a> | bi  | 1 | <a href="#">1373</a> |
| 1 | <a href="#">1512</a> | 821 | bi  | 1 | <a href="#">1941</a> | bi  | 1 | <a href="#">1366</a> | bi  | 1 | <a href="#">1291</a> | bi  | 1 | <a href="#">1374</a> |
| 1 | <a href="#">1513</a> | 686 | bi  | 1 | <a href="#">1942</a> | bi  | 1 | <a href="#">1367</a> | bi  | 1 | <a href="#">1292</a> | bi  | 1 | <a href="#">1375</a> |
| 1 | <a href="#">1514</a> | 143 | bi  | 1 | <a href="#">1943</a> | bi  | 1 | <a href="#">1368</a> | bi  | 1 | <a href="#">1293</a> | bi  | 1 | <a href="#">1376</a> |
| 1 | <a href="#">1515</a> | 148 | bi  | 1 | <a href="#">1944</a> | bi  | 1 | <a href="#">1369</a> | bi  | 1 | <a href="#">1294</a> | bi  | 1 | <a href="#">1377</a> |
| 1 | <a href="#">1516</a> | 367 | bi  | 1 | <a href="#">1945</a> | bi  | 1 | <a href="#">1370</a> | bi  | 1 | <a href="#">1295</a> | bi  | 1 | <a href="#">1378</a> |
| 1 | <a href="#">1517</a> | 88  | bi  | 1 | <a href="#">1946</a> | bi  | 1 | <a href="#">1371</a> | bi  | 1 | <a href="#">1296</a> | bi  | 1 | <a href="#">1379</a> |
| 1 | <a href="#">1518</a> | 200 | bi  | 1 | <a href="#">1947</a> | bi  | 1 | <a href="#">1372</a> | bi  | 1 | <a href="#">1297</a> | bi  | 1 | <a href="#">1380</a> |
| 1 | <a href="#">1519</a> | 212 | bi  | 1 | <a href="#">1948</a> | bi  | 1 | <a href="#">1373</a> | bi  | 1 | <a href="#">1298</a> | bi  | 1 | <a href="#">1381</a> |
| 1 | <a href="#">1520</a> | 181 | bi  | 1 | <a href="#">1949</a> | bi  | 1 | <a href="#">1374</a> | bi  | 1 | <a href="#">1299</a> | bi  | 1 | <a href="#">1382</a> |
| 1 | <a href="#">1521</a> | 97  | bi  | 1 | <a href="#">1950</a> | bi  | 1 | <a href="#">1375</a> | bi  | 1 | <a href="#">1300</a> | bi  | 1 | <a href="#">1383</a> |
| 1 | <a href="#">1522</a> | 493 | bi  | 1 | <a href="#">1951</a> | bi  | 1 | <a href="#">1376</a> | bi  | 1 | <a href="#">1301</a> | bi  | 1 | <a href="#">1384</a> |
| 1 | <a href="#">1523</a> | 173 | bi  | 1 | <a href="#">1952</a> | bi  | 1 | <a href="#">1377</a> | bi  | 1 | <a href="#">1302</a> | bi  | 1 | <a href="#">1385</a> |
| 1 | <a href="#">1524</a> | 218 | bi  | 1 | <a href="#">1953</a> | bi  | 1 | <a href="#">1378</a> | bi  | 1 | <a href="#">1303</a> | bi  | 1 | <a href="#">1386</a> |
| 1 | <a href="#">1525</a> | 304 | bi  | 1 | <a href="#">1954</a> | bi  | 1 | <a href="#">1379</a> | bi  | 1 | <a href="#">1304</a> | bi  | 1 | <a href="#">1387</a> |
| 1 | <a href="#">1526</a> | 455 | bi  | 1 | <a href="#">1955</a> | bi  | 1 | <a href="#">1380</a> | bi  | 1 | <a href="#">1305</a> | bi  | 1 | <a href="#">1388</a> |
| 1 | <a href="#">3312</a> | 475 | bi  | 1 | <a href="#">1956</a> | bi  | 1 | <a href="#">1381</a> | bi  | 1 | <a href="#">1306</a> | bi  | 1 | <a href="#">1389</a> |
| 1 | <a href="#">1527</a> | 478 | bi  | 1 | <a href="#">1957</a> | bi  | 1 | <a href="#">1382</a> | bi  | 1 | <a href="#">1307</a> | bi  | 1 | <a href="#">1390</a> |
| 1 | <a href="#">1528</a> | 191 | bi  | 1 | <a href="#">1958</a> | bi  | 1 | <a href="#">1383</a> | bi  | 1 | <a href="#">1308</a> | bi  | 1 | <a href="#">1391</a> |
| 1 | <a href="#">1529</a> | 116 | bi  | 1 | <a href="#">1959</a> | bi  | 1 | <a href="#">1384</a> | bi  | 1 | <a href="#">1309</a> | bi  | 1 | <a href="#">1392</a> |
| 1 | <a href="#">1530</a> | 377 | bi  | 1 | <a href="#">1960</a> | bi  | 1 | <a href="#">1385</a> | bi  | 1 | <a href="#">1310</a> | bi  | 1 | <a href="#">1393</a> |
| 1 | <a href="#">1531</a> | 194 | bi  | 1 | <a href="#">1961</a> | bi  | 1 | <a href="#">1386</a> | bi  | 1 | <a href="#">1311</a> | bi  | 1 | <a href="#">1394</a> |
| 1 | <a href="#">1532</a> | 148 | bi  | 1 | <a href="#">1962</a> | bi  | 1 | <a href="#">1387</a> | bi  | 1 | <a href="#">1312</a> | bi  | 1 | <a href="#">1395</a> |
| 1 | <a href="#">1533</a> | 256 | bi  | 1 | <a href="#">1963</a> | bi  | 1 | <a href="#">1388</a> | bi  | 1 | <a href="#">1313</a> | bi  | 1 | <a href="#">1396</a> |
| 1 | <a href="#">1534</a> | 336 | bi  | 1 | <a href="#">1964</a> | bi  | 1 | <a href="#">1389</a> | bi  | 1 | <a href="#">1314</a> | bi  | 1 | <a href="#">1397</a> |

|   |                      |     |    |   |                      |    |   |                      |    |   |                      |    |   |                      |
|---|----------------------|-----|----|---|----------------------|----|---|----------------------|----|---|----------------------|----|---|----------------------|
| 1 | <a href="#">1535</a> | 320 | bi | 1 | <a href="#">1965</a> | bi | 1 | <a href="#">1390</a> | bi | 1 | <a href="#">1315</a> | bi | 1 | <a href="#">1398</a> |
| 1 | <a href="#">1536</a> | 218 | bi | 1 | <a href="#">1966</a> | bi | 1 | <a href="#">1391</a> | bi | 1 | <a href="#">1316</a> | bi | 1 | <a href="#">1399</a> |
| 1 | <a href="#">1537</a> | 292 | bi | 1 | <a href="#">1967</a> | bi | 1 | <a href="#">1392</a> | bi | 1 | <a href="#">1317</a> | bi | 1 | <a href="#">1400</a> |
| 1 | <a href="#">1538</a> | 261 | bi | 1 | <a href="#">1968</a> | bi | 1 | <a href="#">1393</a> | bi | 1 | <a href="#">1318</a> | bi | 1 | <a href="#">1401</a> |
| 1 | <a href="#">1539</a> | 468 | bi | 1 | <a href="#">1969</a> | bi | 1 | <a href="#">1394</a> | bi | 1 | <a href="#">1319</a> | bi | 1 | <a href="#">1402</a> |
| 1 | <a href="#">1540</a> | 183 | bi | 1 | <a href="#">1970</a> | bi | 1 | <a href="#">1395</a> | bi | 1 | <a href="#">1320</a> | bi | 1 | <a href="#">1403</a> |
| 1 | <a href="#">1541</a> | 300 | bi | 1 | <a href="#">1971</a> | bi | 1 | <a href="#">1396</a> | bi | 1 | <a href="#">1321</a> | bi | 1 | <a href="#">1404</a> |
| 1 | <a href="#">1542</a> | 436 | bi | 1 | <a href="#">1972</a> | bi | 1 | <a href="#">1397</a> | bi | 1 | <a href="#">1322</a> | bi | 1 | <a href="#">1405</a> |
| 1 | <a href="#">1543</a> | 693 | bi | 1 | <a href="#">1973</a> | bi | 1 | <a href="#">1398</a> | bi | 1 | <a href="#">1323</a> | bi | 1 | <a href="#">1406</a> |
| 1 | <a href="#">1544</a> | 218 | bi | 1 | <a href="#">1974</a> | bi | 1 | <a href="#">1399</a> | bi | 1 | <a href="#">1324</a> | bi | 1 | <a href="#">1407</a> |
| 1 | <a href="#">1545</a> | 288 | bi | 1 | <a href="#">1975</a> | bi | 1 | <a href="#">1400</a> | bi | 1 | <a href="#">1325</a> | bi | 1 | <a href="#">1408</a> |
| 1 | <a href="#">1546</a> | 256 | bi | 1 | <a href="#">1976</a> | bi | 1 | <a href="#">1401</a> | bi | 1 | <a href="#">1326</a> | bi | 1 | <a href="#">1409</a> |
| 1 | <a href="#">1547</a> | 284 | bi | 1 | <a href="#">1977</a> | bi | 1 | <a href="#">1402</a> | bi | 1 | <a href="#">1327</a> | bi | 1 | <a href="#">1410</a> |
| 1 | <a href="#">1548</a> | 314 | bi | 1 | <a href="#">1978</a> | bi | 1 | <a href="#">1403</a> | bi | 1 | <a href="#">1328</a> | bi | 1 | <a href="#">1411</a> |
| 1 | <a href="#">1549</a> | 297 | bi | 1 | <a href="#">1979</a> | bi | 1 | <a href="#">1404</a> | bi | 1 | <a href="#">1329</a> | bi | 1 | <a href="#">1412</a> |
| 1 | <a href="#">1550</a> | 351 | bi | 1 | <a href="#">1980</a> | bi | 1 | <a href="#">1405</a> | bi | 1 | <a href="#">1330</a> | bi | 1 | <a href="#">1413</a> |
| 1 | <a href="#">1551</a> | 433 | bi | 1 | <a href="#">1981</a> | bi | 1 | <a href="#">1406</a> | bi | 1 | <a href="#">1331</a> | bi | 1 | <a href="#">1414</a> |
| 1 | <a href="#">1552</a> | 329 | bi | 1 | <a href="#">1982</a> | bi | 1 | <a href="#">1407</a> | bi | 1 | <a href="#">1332</a> | bi | 1 | <a href="#">1415</a> |
| 1 | <a href="#">1553</a> | 331 | bi | 1 | <a href="#">1983</a> | bi | 1 | <a href="#">1408</a> | bi | 1 | <a href="#">1333</a> | bi | 1 | <a href="#">1416</a> |
| 1 | <a href="#">1554</a> | 470 | bi | 1 | <a href="#">1984</a> | bi | 1 | <a href="#">1409</a> | bi | 1 | <a href="#">1334</a> | bi | 1 | <a href="#">1417</a> |
| 1 | <a href="#">1555</a> | 361 | bi | 1 | <a href="#">1985</a> | bi | 1 | <a href="#">1410</a> | bi | 1 | <a href="#">1335</a> | bi | 1 | <a href="#">1418</a> |
| 1 | <a href="#">1556</a> | 274 | bi | 1 | <a href="#">1986</a> | bi | 1 | <a href="#">1411</a> | bi | 1 | <a href="#">1336</a> | bi | 1 | <a href="#">1419</a> |
| 1 | <a href="#">1557</a> | 345 | bi | 1 | <a href="#">1987</a> | bi | 1 | <a href="#">1412</a> | bi | 1 | <a href="#">1337</a> | bi | 1 | <a href="#">1420</a> |
| 1 | <a href="#">1558</a> | 241 | bi | 1 | <a href="#">1988</a> | bi | 1 | <a href="#">1413</a> | bi | 1 | <a href="#">1338</a> | bi | 1 | <a href="#">1421</a> |
| 1 | <a href="#">1559</a> | 233 | bi | 1 | <a href="#">1989</a> | bi | 1 | <a href="#">1414</a> | bi | 1 | <a href="#">1339</a> | bi | 1 | <a href="#">1422</a> |
| 1 | <a href="#">1560</a> | 265 | bi | 1 | <a href="#">1990</a> | bi | 1 | <a href="#">1415</a> | bi | 1 | <a href="#">1340</a> | bi | 1 | <a href="#">1423</a> |
| 1 | <a href="#">1561</a> | 143 | bi | 1 | <a href="#">1991</a> | bi | 1 | <a href="#">1416</a> | bi | 1 | <a href="#">1341</a> | bi | 1 | <a href="#">1424</a> |
| 1 | <a href="#">1562</a> | 321 | bi | 1 | <a href="#">1992</a> | bi | 1 | <a href="#">1417</a> | bi | 1 | <a href="#">1342</a> | bi | 1 | <a href="#">1425</a> |
| 1 | <a href="#">1563</a> | 201 | bi | 1 | <a href="#">1993</a> | bi | 1 | <a href="#">1418</a> | bi | 1 | <a href="#">1343</a> | bi | 1 | <a href="#">1426</a> |
| 1 | <a href="#">1564</a> | 314 | bi | 1 | <a href="#">1994</a> | bi | 1 | <a href="#">1419</a> | bi | 1 | <a href="#">1344</a> | bi | 1 | <a href="#">1427</a> |
| 1 | <a href="#">1565</a> | 428 | bi | 1 | <a href="#">1995</a> | bi | 1 | <a href="#">1420</a> | bi | 1 | <a href="#">1345</a> | bi | 1 | <a href="#">1428</a> |
| 1 | <a href="#">1566</a> | 227 | bi | 1 | <a href="#">1996</a> | bi | 1 | <a href="#">1421</a> | bi | 1 | <a href="#">1346</a> | bi | 1 | <a href="#">1429</a> |
| 1 | <a href="#">1567</a> | 244 | bi | 1 | <a href="#">1997</a> | bi | 1 | <a href="#">1422</a> | bi | 1 | <a href="#">1347</a> | bi | 1 | <a href="#">1431</a> |
| 1 | <a href="#">1568</a> | 285 | bi | 1 | <a href="#">1998</a> | bi | 1 | <a href="#">1423</a> | bi | 1 | <a href="#">1348</a> | bi | 1 | <a href="#">1432</a> |
| 1 | <a href="#">1569</a> | 123 | bi | 1 | <a href="#">1999</a> | bi | 1 | <a href="#">1424</a> | bi | 1 | <a href="#">1349</a> | bi | 1 | <a href="#">1433</a> |
| 1 | <a href="#">1570</a> | 148 | bi | 1 | <a href="#">2000</a> | bi | 1 | <a href="#">1425</a> | bi | 1 | <a href="#">1350</a> | bi | 1 | <a href="#">1434</a> |
| 1 | <a href="#">1571</a> | 185 | bi | 1 | <a href="#">2001</a> | bi | 1 | <a href="#">1426</a> | bi | 1 | <a href="#">1351</a> | bi | 1 | <a href="#">1435</a> |
| 1 | <a href="#">1572</a> | 478 | bi | 1 | <a href="#">2002</a> | bi | 1 | <a href="#">1427</a> | bi | 1 | <a href="#">1352</a> | bi | 1 | <a href="#">1436</a> |
| 1 | <a href="#">1573</a> | 73  | bi | 1 | <a href="#">2003</a> | bi | 1 | <a href="#">1428</a> | bi | 1 | <a href="#">1353</a> | bi | 1 | <a href="#">1437</a> |
| 1 | <a href="#">1574</a> | 172 | bi | 1 | <a href="#">2004</a> | bi | 1 | <a href="#">1429</a> | bi | 1 | <a href="#">1354</a> | bi | 1 | <a href="#">1438</a> |
| 1 | <a href="#">1575</a> | 215 | bi | 1 | <a href="#">2005</a> | bi | 1 | <a href="#">1430</a> | bi | 1 | <a href="#">1355</a> | bi | 1 | <a href="#">1439</a> |
| 1 | <a href="#">1576</a> | 276 | bi | 1 | <a href="#">2006</a> | bi | 1 | <a href="#">1431</a> | bi | 1 | <a href="#">1356</a> | bi | 1 | <a href="#">1440</a> |
| 1 | <a href="#">1577</a> | 281 | bi | 1 | <a href="#">2007</a> | bi | 1 | <a href="#">1432</a> | bi | 1 | <a href="#">1357</a> | bi | 1 | <a href="#">1441</a> |
| 1 | <a href="#">1578</a> | 221 | bi | 1 | <a href="#">2008</a> | bi | 1 | <a href="#">1433</a> | bi | 1 | <a href="#">1358</a> | bi | 1 | <a href="#">1442</a> |
| 1 | <a href="#">1579</a> | 66  | bi | 1 | <a href="#">2009</a> | bi | 1 | <a href="#">1434</a> | bi | 1 | <a href="#">1359</a> | bi | 1 | <a href="#">1443</a> |
| 1 | <a href="#">1580</a> | 171 | bi | 1 | <a href="#">2010</a> | bi | 1 | <a href="#">1435</a> | bi | 1 | <a href="#">1360</a> | bi | 1 | <a href="#">1444</a> |
| 1 | <a href="#">1581</a> | 771 | bi | 1 | <a href="#">2011</a> | bi | 1 | <a href="#">1436</a> | bi | 1 | <a href="#">1361</a> | bi | 1 | <a href="#">1445</a> |
| 1 | <a href="#">1582</a> | 156 | bi | 1 | <a href="#">2012</a> | bi | 1 | <a href="#">1437</a> | bi | 1 | <a href="#">1362</a> | bi | 1 | <a href="#">1446</a> |
| 1 | <a href="#">1583</a> | 263 | bi | 1 | <a href="#">2013</a> | bi | 1 | <a href="#">1438</a> | bi | 1 | <a href="#">1363</a> | bi | 1 | <a href="#">1447</a> |
| 1 | <a href="#">1584</a> | 314 | bi | 1 | <a href="#">2014</a> | bi | 1 | <a href="#">1439</a> | bi | 1 | <a href="#">1364</a> | bi | 1 | <a href="#">1448</a> |
| 1 | <a href="#">1585</a> | 189 | bi | 1 | <a href="#">2015</a> | bi | 1 | <a href="#">1440</a> | bi | 1 | <a href="#">1365</a> | bi | 1 | <a href="#">1449</a> |
| 1 | <a href="#">1586</a> | 79  | bi | 1 | <a href="#">2016</a> | bi | 1 | <a href="#">1441</a> | bi | 1 | <a href="#">1366</a> | bi | 1 | <a href="#">1450</a> |
| 1 | <a href="#">1587</a> | 92  | bi | 1 | <a href="#">2017</a> | bi | 1 | <a href="#">1442</a> | bi | 1 | <a href="#">1367</a> | bi | 1 | <a href="#">1451</a> |
| 1 | <a href="#">1588</a> | 242 | bi | 1 | <a href="#">2018</a> | bi | 1 | <a href="#">1443</a> | bi | 1 | <a href="#">1368</a> | bi | 1 | <a href="#">1452</a> |
| 1 | <a href="#">1589</a> | 161 | bi | 1 | <a href="#">2019</a> | bi | 1 | <a href="#">1444</a> | bi | 1 | <a href="#">1369</a> | bi | 1 | <a href="#">1453</a> |
| 1 | <a href="#">1590</a> | 251 | bi | 1 | <a href="#">2020</a> | bi | 1 | <a href="#">1445</a> | bi | 1 | <a href="#">1370</a> | bi | 1 | <a href="#">1454</a> |
| 1 | <a href="#">1591</a> | 473 | bi | 1 | <a href="#">2021</a> | bi | 1 | <a href="#">1446</a> | bi | 1 | <a href="#">1371</a> | bi | 1 | <a href="#">1455</a> |

|   |                      |      |    |   |                      |    |   |                      |    |   |                      |    |   |                      |
|---|----------------------|------|----|---|----------------------|----|---|----------------------|----|---|----------------------|----|---|----------------------|
| 1 | <a href="#">1592</a> | 113  | bi | 1 | <a href="#">2022</a> | bi | 1 | <a href="#">1447</a> | bi | 1 | <a href="#">1372</a> | bi | 1 | <a href="#">1456</a> |
| 1 | <a href="#">1593</a> | 155  | bi | 1 | <a href="#">2023</a> | bi | 1 | <a href="#">1448</a> | bi | 1 | <a href="#">1373</a> | bi | 1 | <a href="#">1457</a> |
| 1 | <a href="#">1594</a> | 237  | bi | 1 | <a href="#">2024</a> | bi | 1 | <a href="#">1449</a> | bi | 1 | <a href="#">1374</a> | bi | 1 | <a href="#">1458</a> |
| 1 | <a href="#">1595</a> | 592  | bi | 1 | <a href="#">2025</a> | bi | 1 | <a href="#">1450</a> | bi | 1 | <a href="#">1375</a> | bi | 1 | <a href="#">1459</a> |
| 1 | <a href="#">1596</a> | 297  | bi | 1 | <a href="#">2026</a> | bi | 1 | <a href="#">1451</a> | bi | 1 | <a href="#">1376</a> | bi | 1 | <a href="#">1460</a> |
| 1 | <a href="#">1597</a> | 393  | bi | 1 | <a href="#">2027</a> | bi | 1 | <a href="#">1452</a> | bi | 1 | <a href="#">1377</a> | bi | 1 | <a href="#">1461</a> |
| 1 | <a href="#">1598</a> | 897  | bi | 1 | <a href="#">2028</a> | bi | 1 | <a href="#">1453</a> | bi | 1 | <a href="#">1378</a> | bi | 1 | <a href="#">1462</a> |
| 1 | <a href="#">1599</a> | 430  | bi | 1 | <a href="#">2029</a> | bi | 1 | <a href="#">1454</a> | bi | 1 | <a href="#">1379</a> | bi | 1 | <a href="#">1463</a> |
| 1 | <a href="#">1600</a> | 349  | bi | 1 | <a href="#">2030</a> | bi | 1 | <a href="#">1455</a> | bi | 1 | <a href="#">1380</a> | bi | 1 | <a href="#">1464</a> |
| 1 | <a href="#">1601</a> | 310  | bi | 1 | <a href="#">2031</a> | bi | 1 | <a href="#">1456</a> | bi | 1 | <a href="#">1381</a> | bi | 1 | <a href="#">1465</a> |
| 1 | <a href="#">1602</a> | 233  | bi | 1 | <a href="#">2032</a> | bi | 1 | <a href="#">1457</a> | bi | 1 | <a href="#">1382</a> | bi | 1 | <a href="#">1466</a> |
| 1 | <a href="#">1603</a> | 211  | bi | 1 | <a href="#">2033</a> | bi | 1 | <a href="#">1458</a> | bi | 1 | <a href="#">1383</a> | bi | 1 | <a href="#">1467</a> |
| 1 | <a href="#">1604</a> | 238  | bi | 1 | <a href="#">2034</a> | bi | 1 | <a href="#">1459</a> | bi | 1 | <a href="#">1384</a> | bi | 1 | <a href="#">1468</a> |
| 1 | <a href="#">1605</a> | 313  | bi | 1 | <a href="#">2035</a> | bi | 1 | <a href="#">1460</a> | bi | 1 | <a href="#">1385</a> | bi | 1 | <a href="#">1469</a> |
| 1 | <a href="#">1606</a> | 264  | bi | 1 | <a href="#">2036</a> | bi | 1 | <a href="#">1461</a> | bi | 1 | <a href="#">1386</a> | bi | 1 | <a href="#">1470</a> |
| 1 | <a href="#">1607</a> | 1061 | bi | 1 | <a href="#">2037</a> | bi | 1 | <a href="#">1462</a> | bi | 1 | <a href="#">1387</a> | bi | 1 | <a href="#">1471</a> |
| 1 | <a href="#">1608</a> | 360  | bi | 1 | <a href="#">2038</a> | bi | 1 | <a href="#">1463</a> | bi | 1 | <a href="#">1388</a> | bi | 1 | <a href="#">1472</a> |
| 1 | <a href="#">1609</a> | 428  | bi | 1 | <a href="#">2039</a> | bi | 1 | <a href="#">1464</a> | bi | 1 | <a href="#">1389</a> | bi | 1 | <a href="#">1473</a> |
| 1 | <a href="#">1610</a> | 309  | bi | 1 | <a href="#">2040</a> | bi | 1 | <a href="#">1465</a> | bi | 1 | <a href="#">1390</a> | bi | 1 | <a href="#">1474</a> |
| 1 | <a href="#">1611</a> | 427  | bi | 1 | <a href="#">2041</a> | bi | 1 | <a href="#">1466</a> | bi | 1 | <a href="#">1391</a> | bi | 1 | <a href="#">1475</a> |
| 1 | <a href="#">1612</a> | 179  | bi | 1 | <a href="#">2042</a> | bi | 1 | <a href="#">1467</a> | bi | 1 | <a href="#">1392</a> | bi | 1 | <a href="#">1476</a> |
| 1 | <a href="#">3313</a> | 302  | bi | 1 | <a href="#">2043</a> | bi | 1 | <a href="#">1468</a> | bi | 1 | <a href="#">1393</a> | bi | 1 | <a href="#">1477</a> |
| 1 | <a href="#">1613</a> | 162  | bi | 1 | <a href="#">2044</a> | bi | 1 | <a href="#">1469</a> | bi | 1 | <a href="#">1394</a> | bi | 1 | <a href="#">1478</a> |
| 1 | <a href="#">1614</a> | 235  | bi | 1 | <a href="#">2045</a> | bi | 1 | <a href="#">1470</a> | bi | 1 | <a href="#">1395</a> | bi | 1 | <a href="#">1479</a> |
| 1 | <a href="#">1615</a> | 557  | bi | 1 | <a href="#">2046</a> | bi | 1 | <a href="#">1471</a> | bi | 1 | <a href="#">1396</a> | bi | 1 | <a href="#">1480</a> |
| 1 | <a href="#">1616</a> | 69   | bi | 1 | <a href="#">2047</a> | bi | 1 | <a href="#">1472</a> | bi | 1 | <a href="#">1397</a> | bi | 1 | <a href="#">1481</a> |
| 1 | <a href="#">1617</a> | 154  | bi | 1 | <a href="#">2048</a> | bi | 1 | <a href="#">1473</a> | bi | 1 | <a href="#">1398</a> | bi | 1 | <a href="#">1482</a> |
| 1 | <a href="#">1618</a> | 136  | bi | 1 | <a href="#">2049</a> | bi | 1 | <a href="#">1474</a> | bi | 1 | <a href="#">1399</a> | bi | 1 | <a href="#">1483</a> |
| 1 | <a href="#">1619</a> | 165  | bi | 1 | <a href="#">2050</a> | bi | 1 | <a href="#">1475</a> | bi | 1 | <a href="#">1400</a> | bi | 1 | <a href="#">1484</a> |
| 1 | <a href="#">1620</a> | 254  | bi | 1 | <a href="#">2051</a> | bi | 1 | <a href="#">1476</a> | bi | 1 | <a href="#">1401</a> | bi | 1 | <a href="#">1485</a> |
| 1 | <a href="#">1621</a> | 595  | bi | 1 | <a href="#">2052</a> | bi | 1 | <a href="#">1477</a> | bi | 1 | <a href="#">1402</a> | bi | 1 | <a href="#">1486</a> |
| 1 | <a href="#">1622</a> | 584  | bi | 1 | <a href="#">2053</a> | bi | 1 | <a href="#">1478</a> | bi | 1 | <a href="#">1403</a> | bi | 1 | <a href="#">1487</a> |
| 1 | <a href="#">1623</a> | 73   | bi | 1 | <a href="#">2054</a> | bi | 1 | <a href="#">1479</a> | bi | 1 | <a href="#">1404</a> | bi | 1 | <a href="#">1488</a> |
| 1 | <a href="#">1624</a> | 32   | -  |   |                      | -  |   |                      | -  |   |                      | -  |   |                      |
| 1 | <a href="#">1625</a> | 298  | bi | 1 | <a href="#">2055</a> | bi | 1 | <a href="#">1480</a> | bi | 1 | <a href="#">1405</a> | bi | 1 | <a href="#">1489</a> |
| 1 | <a href="#">1626</a> | 156  | bi | 1 | <a href="#">2056</a> | bi | 1 | <a href="#">1481</a> | bi | 1 | <a href="#">1406</a> | bi | 1 | <a href="#">1490</a> |
| 1 | <a href="#">1627</a> | 221  | bi | 1 | <a href="#">2057</a> | bi | 1 | <a href="#">1482</a> | bi | 1 | <a href="#">1407</a> | bi | 1 | <a href="#">1491</a> |
| 1 | <a href="#">1628</a> | 421  | bi | 1 | <a href="#">2058</a> | bi | 1 | <a href="#">1483</a> | bi | 1 | <a href="#">1408</a> | bi | 1 | <a href="#">1547</a> |
| 1 | <a href="#">1629</a> | 804  | bi | 1 | <a href="#">2059</a> | bi | 1 | <a href="#">1484</a> | bi | 1 | <a href="#">1409</a> | bi | 1 | <a href="#">1548</a> |
| 1 | <a href="#">1630</a> | 334  | bi | 1 | <a href="#">2062</a> | bi | 1 | <a href="#">1487</a> | bi | 1 | <a href="#">1412</a> | bi | 1 | <a href="#">1552</a> |
| 1 | <a href="#">1631</a> | 368  | bi | 1 | <a href="#">2063</a> | bi | 1 | <a href="#">1488</a> | bi | 1 | <a href="#">1413</a> | bi | 1 | <a href="#">1553</a> |
| 1 | <a href="#">1632</a> | 196  | bi | 1 | <a href="#">2064</a> | bi | 1 | <a href="#">1489</a> | bi | 1 | <a href="#">1414</a> | bi | 1 | <a href="#">1554</a> |
| 1 | <a href="#">1633</a> | 144  | bi | 1 | <a href="#">2065</a> | bi | 1 | <a href="#">1490</a> | bi | 1 | <a href="#">1415</a> | bi | 1 | <a href="#">1555</a> |
| 1 | <a href="#">1634</a> | 299  | bi | 1 | <a href="#">2066</a> | bi | 1 | <a href="#">1491</a> | bi | 1 | <a href="#">1416</a> | bi | 1 | <a href="#">1556</a> |
| 1 | <a href="#">1635</a> | 341  | bi | 1 | <a href="#">2067</a> | bi | 1 | <a href="#">1492</a> | bi | 1 | <a href="#">1417</a> | bi | 1 | <a href="#">1557</a> |
| 1 | <a href="#">1636</a> | 279  | bi | 1 | <a href="#">2068</a> | bi | 1 | <a href="#">1493</a> | bi | 1 | <a href="#">1418</a> | bi | 1 | <a href="#">1558</a> |
| 1 | <a href="#">1637</a> | 312  | bi | 1 | <a href="#">2069</a> | bi | 1 | <a href="#">1494</a> | bi | 1 | <a href="#">1419</a> | bi | 1 | <a href="#">1559</a> |
| 1 | <a href="#">1638</a> | 321  | bi | 1 | <a href="#">2070</a> | bi | 1 | <a href="#">1495</a> | bi | 1 | <a href="#">1420</a> | bi | 1 | <a href="#">1560</a> |
| 1 | <a href="#">1639</a> | 119  | bi | 1 | <a href="#">2071</a> | bi | 1 | <a href="#">1496</a> | bi | 1 | <a href="#">1421</a> | bi | 1 | <a href="#">1561</a> |
| 1 | <a href="#">1640</a> | 108  | bi | 1 | <a href="#">2072</a> | bi | 1 | <a href="#">1497</a> | bi | 1 | <a href="#">1422</a> | bi | 1 | <a href="#">1562</a> |
| 1 | <a href="#">1641</a> | 534  | bi | 1 | <a href="#">2073</a> | bi | 1 | <a href="#">1498</a> | bi | 1 | <a href="#">1423</a> | bi | 1 | <a href="#">1563</a> |
| 1 | <a href="#">1642</a> | 226  | bi | 1 | <a href="#">2074</a> | bi | 1 | <a href="#">1499</a> | bi | 1 | <a href="#">1424</a> | bi | 1 | <a href="#">1564</a> |
| 1 | <a href="#">1643</a> | 253  | bi | 1 | <a href="#">2075</a> | bi | 1 | <a href="#">1500</a> | bi | 1 | <a href="#">1425</a> | bi | 1 | <a href="#">1565</a> |
| 1 | <a href="#">1644</a> | 270  | bi | 1 | <a href="#">2076</a> | bi | 1 | <a href="#">1501</a> | bi | 1 | <a href="#">1426</a> | bi | 1 | <a href="#">1566</a> |
| 1 | <a href="#">1645</a> | 295  | bi | 1 | <a href="#">2077</a> | bi | 1 | <a href="#">1502</a> | bi | 1 | <a href="#">1427</a> | bi | 1 | <a href="#">1567</a> |
| 1 | <a href="#">1646</a> | 307  | bi | 1 | <a href="#">2078</a> | bi | 1 | <a href="#">1503</a> | bi | 1 | <a href="#">1428</a> | bi | 1 | <a href="#">1568</a> |
| 1 | <a href="#">1647</a> | 285  | bi | 1 | <a href="#">2079</a> | bi | 1 | <a href="#">1504</a> | bi | 1 | <a href="#">1429</a> | bi | 1 | <a href="#">1569</a> |

|   |                      |      |     |   |                      |     |   |                      |     |   |                      |     |   |                      |
|---|----------------------|------|-----|---|----------------------|-----|---|----------------------|-----|---|----------------------|-----|---|----------------------|
| 1 | <a href="#">1648</a> | 295  | bi  | 1 | <a href="#">2080</a> | bi  | 1 | <a href="#">1505</a> | bi  | 1 | <a href="#">1430</a> | bi  | 1 | <a href="#">1570</a> |
| 1 | <a href="#">1649</a> | 229  | bi  | 1 | <a href="#">2081</a> | bi  | 1 | <a href="#">1506</a> | bi  | 1 | <a href="#">1431</a> | bi  | 1 | <a href="#">1571</a> |
| 1 | <a href="#">3362</a> | 367  | uni | 1 | <a href="#">2082</a> | uni | 1 | <a href="#">1507</a> | uni | 1 | <a href="#">1432</a> | uni | 1 | <a href="#">1572</a> |
| 1 | <a href="#">3363</a> | 25   | bi  | 1 | <a href="#">2083</a> | -   |   |                      | -   |   |                      | bi  | 1 | <a href="#">1573</a> |
| 1 | <a href="#">1650</a> | 846  | bi  | 1 | <a href="#">2084</a> | bi  | 1 | <a href="#">1508</a> | bi  | 1 | <a href="#">1433</a> | bi  | 1 | <a href="#">1574</a> |
| 1 | <a href="#">1651</a> | 184  | bi  | 1 | <a href="#">2085</a> | bi  | 1 | <a href="#">1509</a> | bi  | 1 | <a href="#">1434</a> | bi  | 1 | <a href="#">1575</a> |
| 1 | <a href="#">1652</a> | 229  | bi  | 1 | <a href="#">2086</a> | bi  | 1 | <a href="#">1510</a> | bi  | 1 | <a href="#">1435</a> | bi  | 1 | <a href="#">1576</a> |
| 1 | <a href="#">1653</a> | 439  | bi  | 1 | <a href="#">2087</a> | bi  | 1 | <a href="#">1511</a> | bi  | 1 | <a href="#">1436</a> | bi  | 1 | <a href="#">1577</a> |
| 1 | <a href="#">1654</a> | 239  | uni | 1 | <a href="#">542</a>  | bi  | 1 | <a href="#">1512</a> | bi  | 1 | <a href="#">1437</a> | bi  | 1 | <a href="#">1578</a> |
| 1 | <a href="#">1655</a> | 112  | bi  | 1 | <a href="#">2088</a> | bi  | 1 | <a href="#">1513</a> | bi  | 1 | <a href="#">1438</a> | bi  | 1 | <a href="#">1579</a> |
| 1 | <a href="#">1656</a> | 96   | bi  | 1 | <a href="#">2089</a> | bi  | 1 | <a href="#">1514</a> | bi  | 1 | <a href="#">1439</a> | bi  | 1 | <a href="#">1580</a> |
| 1 | <a href="#">1657</a> | 221  | bi  | 1 | <a href="#">2090</a> | bi  | 1 | <a href="#">1515</a> | bi  | 1 | <a href="#">1440</a> | bi  | 1 | <a href="#">1581</a> |
| 1 | <a href="#">1658</a> | 78   | bi  | 1 | <a href="#">2091</a> | bi  | 1 | <a href="#">1516</a> | bi  | 1 | <a href="#">1441</a> | bi  | 1 | <a href="#">1582</a> |
| 1 | <a href="#">1659</a> | 255  | bi  | 1 | <a href="#">2092</a> | bi  | 1 | <a href="#">1517</a> | bi  | 1 | <a href="#">1442</a> | bi  | 1 | <a href="#">1583</a> |
| 1 | <a href="#">1660</a> | 174  | bi  | 1 | <a href="#">2093</a> | bi  | 1 | <a href="#">1518</a> | bi  | 1 | <a href="#">1443</a> | bi  | 1 | <a href="#">1584</a> |
| 1 | <a href="#">1661</a> | 245  | bi  | 1 | <a href="#">2095</a> | bi  | 1 | <a href="#">1519</a> | bi  | 1 | <a href="#">1444</a> | bi  | 1 | <a href="#">1585</a> |
| 1 | <a href="#">1662</a> | 110  | bi  | 1 | <a href="#">2096</a> | bi  | 1 | <a href="#">1521</a> | -   |   |                      | bi  | 1 | <a href="#">1586</a> |
| 1 | <a href="#">1663</a> | 416  | bi  | 1 | <a href="#">2097</a> | bi  | 1 | <a href="#">1522</a> | bi  | 1 | <a href="#">1445</a> | bi  | 1 | <a href="#">1587</a> |
| 1 | <a href="#">1664</a> | 514  | bi  | 1 | <a href="#">2098</a> | bi  | 1 | <a href="#">1523</a> | bi  | 1 | <a href="#">1446</a> | bi  | 1 | <a href="#">1588</a> |
| 1 | <a href="#">1665</a> | 191  | bi  | 1 | <a href="#">2099</a> | bi  | 1 | <a href="#">1524</a> | bi  | 1 | <a href="#">1447</a> | bi  | 1 | <a href="#">1589</a> |
| 1 | <a href="#">1666</a> | 344  | bi  | 1 | <a href="#">2100</a> | bi  | 1 | <a href="#">1525</a> | bi  | 1 | <a href="#">1448</a> | bi  | 1 | <a href="#">1590</a> |
| 1 | <a href="#">1667</a> | 480  | bi  | 1 | <a href="#">2101</a> | bi  | 1 | <a href="#">1526</a> | bi  | 1 | <a href="#">1449</a> | bi  | 1 | <a href="#">1591</a> |
| 1 | <a href="#">1668</a> | 740  | bi  | 1 | <a href="#">2102</a> | bi  | 1 | <a href="#">1527</a> | bi  | 1 | <a href="#">1450</a> | bi  | 1 | <a href="#">1592</a> |
| 1 | <a href="#">1669</a> | 225  | bi  | 1 | <a href="#">2103</a> | bi  | 1 | <a href="#">1528</a> | bi  | 1 | <a href="#">1451</a> | bi  | 1 | <a href="#">1593</a> |
| 1 | <a href="#">1670</a> | 84   | bi  | 1 | <a href="#">2104</a> | bi  | 1 | <a href="#">1529</a> | bi  | 1 | <a href="#">1452</a> | bi  | 1 | <a href="#">1594</a> |
| 1 | <a href="#">1671</a> | 238  | bi  | 1 | <a href="#">2105</a> | bi  | 1 | <a href="#">1530</a> | bi  | 1 | <a href="#">1453</a> | bi  | 1 | <a href="#">1595</a> |
| 1 | <a href="#">1672</a> | 375  | bi  | 1 | <a href="#">2106</a> | bi  | 1 | <a href="#">1531</a> | bi  | 1 | <a href="#">1454</a> | bi  | 1 | <a href="#">1596</a> |
| 1 | <a href="#">1673</a> | 163  | bi  | 1 | <a href="#">2107</a> | bi  | 1 | <a href="#">1532</a> | bi  | 1 | <a href="#">1455</a> | bi  | 1 | <a href="#">1597</a> |
| 1 | <a href="#">1674</a> | 289  | bi  | 1 | <a href="#">2108</a> | bi  | 1 | <a href="#">1533</a> | bi  | 1 | <a href="#">1456</a> | bi  | 1 | <a href="#">1599</a> |
| 1 | <a href="#">1675</a> | 292  | bi  | 1 | <a href="#">2109</a> | bi  | 1 | <a href="#">1534</a> | bi  | 1 | <a href="#">1457</a> | bi  | 1 | <a href="#">1600</a> |
| 1 | <a href="#">1676</a> | 547  | bi  | 1 | <a href="#">2110</a> | bi  | 1 | <a href="#">1535</a> | bi  | 1 | <a href="#">1458</a> | bi  | 1 | <a href="#">1601</a> |
| 1 | <a href="#">1677</a> | 81   | bi  | 1 | <a href="#">2111</a> | bi  | 1 | <a href="#">1536</a> | bi  | 1 | <a href="#">1459</a> | bi  | 1 | <a href="#">1602</a> |
| 1 | <a href="#">1678</a> | 340  | bi  | 1 | <a href="#">2112</a> | bi  | 1 | <a href="#">1537</a> | bi  | 1 | <a href="#">1460</a> | bi  | 1 | <a href="#">1603</a> |
| 1 | <a href="#">1679</a> | 151  | bi  | 1 | <a href="#">2113</a> | bi  | 1 | <a href="#">1538</a> | bi  | 1 | <a href="#">1461</a> | bi  | 1 | <a href="#">1604</a> |
| 1 | <a href="#">1680</a> | 204  | bi  | 1 | <a href="#">2114</a> | bi  | 1 | <a href="#">1539</a> | bi  | 1 | <a href="#">1462</a> | bi  | 1 | <a href="#">1605</a> |
| 1 | <a href="#">1681</a> | 215  | bi  | 1 | <a href="#">2115</a> | bi  | 1 | <a href="#">1540</a> | bi  | 1 | <a href="#">1463</a> | bi  | 1 | <a href="#">1606</a> |
| 1 | <a href="#">1682</a> | 385  | bi  | 1 | <a href="#">2116</a> | bi  | 1 | <a href="#">1541</a> | bi  | 1 | <a href="#">1464</a> | bi  | 1 | <a href="#">1607</a> |
| 1 | <a href="#">1683</a> | 1325 | bi  | 1 | <a href="#">2117</a> | bi  | 1 | <a href="#">1542</a> | bi  | 1 | <a href="#">1465</a> | bi  | 1 | <a href="#">1608</a> |
| 1 | <a href="#">1684</a> | 136  | bi  | 1 | <a href="#">2118</a> | bi  | 1 | <a href="#">1543</a> | bi  | 1 | <a href="#">1466</a> | bi  | 1 | <a href="#">1609</a> |
| 1 | <a href="#">1685</a> | 270  | bi  | 1 | <a href="#">2119</a> | bi  | 1 | <a href="#">1544</a> | bi  | 1 | <a href="#">1467</a> | bi  | 1 | <a href="#">1610</a> |
| 1 | <a href="#">1686</a> | 300  | bi  | 1 | <a href="#">2120</a> | bi  | 1 | <a href="#">1545</a> | bi  | 1 | <a href="#">1468</a> | bi  | 1 | <a href="#">1611</a> |
| 1 | <a href="#">1687</a> | 160  | bi  | 1 | <a href="#">2121</a> | bi  | 1 | <a href="#">1546</a> | bi  | 1 | <a href="#">1469</a> | bi  | 1 | <a href="#">1612</a> |
| 1 | <a href="#">1688</a> | 595  | bi  | 1 | <a href="#">2122</a> | bi  | 1 | <a href="#">1547</a> | bi  | 1 | <a href="#">1470</a> | bi  | 1 | <a href="#">1613</a> |
| 1 | <a href="#">1689</a> | 314  | bi  | 1 | <a href="#">2123</a> | bi  | 1 | <a href="#">1548</a> | bi  | 1 | <a href="#">1471</a> | bi  | 1 | <a href="#">1614</a> |
| 1 | <a href="#">1690</a> | 332  | bi  | 1 | <a href="#">2124</a> | bi  | 1 | <a href="#">1549</a> | bi  | 1 | <a href="#">1472</a> | bi  | 1 | <a href="#">1615</a> |
| 1 | <a href="#">1691</a> | 391  | bi  | 1 | <a href="#">2125</a> | bi  | 1 | <a href="#">1550</a> | bi  | 1 | <a href="#">1473</a> | bi  | 1 | <a href="#">1616</a> |
| 1 | <a href="#">1692</a> | 244  | bi  | 1 | <a href="#">2126</a> | bi  | 1 | <a href="#">1551</a> | bi  | 1 | <a href="#">1474</a> | bi  | 1 | <a href="#">1617</a> |
| 1 | <a href="#">1693</a> | 301  | bi  | 1 | <a href="#">2127</a> | bi  | 1 | <a href="#">1552</a> | bi  | 1 | <a href="#">1475</a> | bi  | 1 | <a href="#">1618</a> |
| 1 | <a href="#">1694</a> | 282  | bi  | 1 | <a href="#">2128</a> | bi  | 1 | <a href="#">1553</a> | bi  | 1 | <a href="#">1476</a> | bi  | 1 | <a href="#">1619</a> |
| 1 | <a href="#">1695</a> | 80   | bi  | 1 | <a href="#">2129</a> | -   |   |                      | -   |   |                      | -   |   |                      |
| 1 | <a href="#">1696</a> | 687  | bi  | 1 | <a href="#">2130</a> | bi  | 1 | <a href="#">1554</a> | bi  | 1 | <a href="#">1477</a> | uni | 1 | <a href="#">1084</a> |
| 1 | <a href="#">1697</a> | 470  | bi  | 1 | <a href="#">2131</a> | bi  | 1 | <a href="#">1555</a> | bi  | 1 | <a href="#">1478</a> | uni | 1 | <a href="#">1669</a> |
| 1 | <a href="#">1698</a> | 285  | bi  | 1 | <a href="#">2132</a> | bi  | 1 | <a href="#">1556</a> | bi  | 1 | <a href="#">1479</a> | uni | 1 | <a href="#">1412</a> |
| 1 | <a href="#">1699</a> | 277  | bi  | 1 | <a href="#">2133</a> | bi  | 1 | <a href="#">1557</a> | bi  | 1 | <a href="#">1480</a> | -   |   |                      |
| 1 | <a href="#">1700</a> | 285  | bi  | 1 | <a href="#">2134</a> | bi  | 1 | <a href="#">1558</a> | bi  | 1 | <a href="#">1481</a> | -   |   |                      |
| 1 | <a href="#">1701</a> | 511  | bi  | 1 | <a href="#">2135</a> | bi  | 1 | <a href="#">1559</a> | bi  | 1 | <a href="#">1482</a> | -   |   |                      |
| 1 | <a href="#">1702</a> | 448  | bi  | 1 | <a href="#">2136</a> | bi  | 1 | <a href="#">1560</a> | bi  | 1 | <a href="#">1483</a> | bi  | 1 | <a href="#">2541</a> |

|   |                      |      |     |   |                      |     |   |                      |     |   |                      |     |   |                      |
|---|----------------------|------|-----|---|----------------------|-----|---|----------------------|-----|---|----------------------|-----|---|----------------------|
| 1 | <a href="#">1703</a> | 243  | -   |   |                      | bi  | 1 | <a href="#">1561</a> | bi  | 1 | <a href="#">1484</a> | -   |   |                      |
| 1 | <a href="#">1704</a> | 244  | bi  | 1 | <a href="#">181</a>  | bi  | 1 | <a href="#">1562</a> | bi  | 1 | <a href="#">1485</a> | uni | 1 | <a href="#">1156</a> |
| 1 | <a href="#">1705</a> | 653  | uni | 1 | <a href="#">2730</a> | bi  | 1 | <a href="#">1563</a> | bi  | 1 | <a href="#">1486</a> | uni | 1 | <a href="#">2100</a> |
| 1 | <a href="#">1706</a> | 1867 | uni | 1 | <a href="#">892</a>  | uni | 1 | <a href="#">2637</a> | bi  | 1 | <a href="#">1487</a> | uni | 1 | <a href="#">2467</a> |
| 1 | <a href="#">1707</a> | 129  | -   |   |                      | -   |   |                      | -   |   |                      | -   |   |                      |
| 1 | <a href="#">1708</a> | 339  | uni | 1 | <a href="#">1994</a> | uni | 1 | <a href="#">1419</a> | bi  | 1 | <a href="#">1488</a> | uni | 1 | <a href="#">1427</a> |
| 1 | <a href="#">1709</a> | 327  | -   |   |                      | -   |   |                      | bi  | 1 | <a href="#">1502</a> | -   |   |                      |
| 1 | <a href="#">1710</a> | 237  | uni | 1 | <a href="#">2237</a> | uni | 1 | <a href="#">1599</a> | bi  | 1 | <a href="#">1503</a> | uni | 1 | <a href="#">1653</a> |
| 1 | <a href="#">1711</a> | 281  | uni | 1 | <a href="#">894</a>  | uni | 1 | <a href="#">2642</a> | bi  | 1 | <a href="#">1504</a> | uni | 1 | <a href="#">2477</a> |
| 1 | <a href="#">1712</a> | 284  | uni | 1 | <a href="#">120</a>  | uni | 1 | <a href="#">1621</a> | bi  | 1 | <a href="#">1505</a> | uni | 1 | <a href="#">2478</a> |
| 1 | <a href="#">3315</a> | 166  | uni | 1 | <a href="#">279</a>  | uni | 1 | <a href="#">2813</a> | bi  | 1 | <a href="#">1506</a> | uni | 1 | <a href="#">2633</a> |
| 1 | <a href="#">3316</a> | 144  | uni | 1 | <a href="#">2118</a> | bi  | 1 | <a href="#">1564</a> | bi  | 1 | <a href="#">1507</a> | bi  | 1 | <a href="#">1620</a> |
| 1 | <a href="#">1713</a> | 96   | uni | 1 | <a href="#">496</a>  | uni | 1 | <a href="#">116</a>  | bi  | 1 | <a href="#">1508</a> | uni | 1 | <a href="#">114</a>  |
| 1 | <a href="#">1714</a> | 172  | bi  | 1 | <a href="#">834</a>  | bi  | 1 | <a href="#">431</a>  | bi  | 1 | <a href="#">1509</a> | bi  | 1 | <a href="#">447</a>  |
| 1 | <a href="#">1715</a> | 143  | bi  | 1 | <a href="#">833</a>  | bi  | 1 | <a href="#">430</a>  | bi  | 1 | <a href="#">1510</a> | bi  | 1 | <a href="#">446</a>  |
| 1 | <a href="#">1716</a> | 165  | bi  | 1 | <a href="#">905</a>  | -   |   |                      | bi  | 1 | <a href="#">1511</a> | -   |   |                      |
| 1 | <a href="#">1717</a> | 101  | -   |   |                      | -   |   |                      | bi  | 1 | <a href="#">1512</a> | -   |   |                      |
| 1 | <a href="#">1718</a> | 468  | bi  | 1 | <a href="#">907</a>  | -   |   |                      | bi  | 1 | <a href="#">1513</a> | -   |   |                      |
| 1 | <a href="#">1719</a> | 251  | bi  | 1 | <a href="#">831</a>  | bi  | 1 | <a href="#">428</a>  | bi  | 1 | <a href="#">1514</a> | bi  | 1 | <a href="#">444</a>  |
| 1 | <a href="#">3317</a> | 282  | uni | 1 | <a href="#">1432</a> | uni | 1 | <a href="#">855</a>  | bi  | 1 | <a href="#">1515</a> | uni | 1 | <a href="#">863</a>  |
| 1 | <a href="#">1720</a> | 195  | bi  | 1 | <a href="#">2137</a> | uni | 1 | <a href="#">2504</a> | bi  | 1 | <a href="#">1516</a> | uni | 1 | <a href="#">2279</a> |
| 1 | <a href="#">1721</a> | 302  | bi  | 1 | <a href="#">2139</a> | -   |   |                      | bi  | 1 | <a href="#">1517</a> | -   |   |                      |
| 1 | <a href="#">1722</a> | 139  | bi  | 1 | <a href="#">2140</a> | -   |   |                      | -   |   |                      | -   |   |                      |
| 1 | <a href="#">1723</a> | 34   | -   |   |                      | -   |   |                      | -   |   |                      | -   |   |                      |
| 1 | <a href="#">1724</a> | 393  | bi  | 1 | <a href="#">2141</a> | uni | 1 | <a href="#">2294</a> | uni | 1 | <a href="#">1321</a> | bi  | 1 | <a href="#">1864</a> |
| 1 | <a href="#">1725</a> | 104  | bi  | 1 | <a href="#">2142</a> | -   |   |                      | -   |   |                      | -   |   |                      |
| 1 | <a href="#">1726</a> | 82   | bi  | 1 | <a href="#">528</a>  | uni | 1 | <a href="#">414</a>  | bi  | 1 | <a href="#">794</a>  | -   |   |                      |
| 1 | <a href="#">1727</a> | 134  | bi  | 1 | <a href="#">2143</a> | uni | 1 | <a href="#">415</a>  | bi  | 1 | <a href="#">793</a>  | uni | 1 | <a href="#">360</a>  |
| 1 | <a href="#">1728</a> | 612  | bi  | 1 | <a href="#">2144</a> | uni | 1 | <a href="#">631</a>  | uni | 1 | <a href="#">530</a>  | uni | 1 | <a href="#">1613</a> |
| 1 | <a href="#">3318</a> | 421  | bi  | 1 | <a href="#">2145</a> | uni | 1 | <a href="#">834</a>  | uni | 1 | <a href="#">726</a>  | uni | 1 | <a href="#">840</a>  |
| 1 | <a href="#">1729</a> | 75   | -   |   |                      | -   |   |                      | -   |   |                      | -   |   |                      |
| 1 | <a href="#">1730</a> | 431  | bi  | 1 | <a href="#">2146</a> | -   |   |                      | -   |   |                      | uni | 1 | <a href="#">424</a>  |
| 1 | <a href="#">3319</a> | 110  | bi  | 1 | <a href="#">2164</a> | bi  | 1 | <a href="#">1928</a> | -   |   |                      | bi  | 1 | <a href="#">363</a>  |
| 1 | <a href="#">3320</a> | 279  | bi  | 1 | <a href="#">2165</a> | bi  | 1 | <a href="#">421</a>  | -   |   |                      | bi  | 1 | <a href="#">437</a>  |
| 1 | <a href="#">1731</a> | 132  | bi  | 1 | <a href="#">2168</a> | -   |   |                      | -   |   |                      | -   |   |                      |
| 1 | <a href="#">1732</a> | 283  | bi  | 1 | <a href="#">2169</a> | -   |   |                      | -   |   |                      | -   |   |                      |
| 1 | <a href="#">1733</a> | 276  | bi  | 1 | <a href="#">2170</a> | -   |   |                      | -   |   |                      | -   |   |                      |
| 1 | <a href="#">1734</a> | 282  | bi  | 1 | <a href="#">2171</a> | -   |   |                      | -   |   |                      | -   |   |                      |
| 1 | <a href="#">3321</a> | 49   | bi  | 1 | <a href="#">2172</a> | -   |   |                      | -   |   |                      | uni | 1 | <a href="#">424</a>  |
| 1 | <a href="#">3322</a> | 318  | bi  | 1 | <a href="#">2173</a> | -   |   |                      | -   |   |                      | uni | 1 | <a href="#">424</a>  |
| 1 | <a href="#">1735</a> | 440  | bi  | 1 | <a href="#">2174</a> | uni | 1 | <a href="#">1450</a> | uni | 1 | <a href="#">1375</a> | uni | 1 | <a href="#">1459</a> |
| 1 | <a href="#">1736</a> | 218  | bi  | 1 | <a href="#">2175</a> | uni | 1 | <a href="#">2877</a> | uni | 1 | <a href="#">2474</a> | uni | 1 | <a href="#">2690</a> |
| 1 | <a href="#">3323</a> | 130  | bi  | 1 | <a href="#">2176</a> | -   |   |                      | bi  | 1 | <a href="#">1667</a> | -   |   |                      |
| 1 | <a href="#">3324</a> | 207  | bi  | 1 | <a href="#">2177</a> | bi  | 1 | <a href="#">2031</a> | -   |   |                      | bi  | 1 | <a href="#">420</a>  |
| 1 | <a href="#">1737</a> | 459  | bi  | 1 | <a href="#">2178</a> | uni | 1 | <a href="#">1937</a> | -   |   |                      | -   |   |                      |
| 1 | <a href="#">1738</a> | 219  | bi  | 1 | <a href="#">2179</a> | bi  | 1 | <a href="#">1936</a> | uni | 1 | <a href="#">2215</a> | uni | 1 | <a href="#">2421</a> |
| 1 | <a href="#">1739</a> | 426  | bi  | 1 | <a href="#">2180</a> | bi  | 1 | <a href="#">1937</a> | uni | 1 | <a href="#">298</a>  | uni | 1 | <a href="#">299</a>  |
| 1 | <a href="#">1740</a> | 162  | bi  | 1 | <a href="#">2181</a> | -   |   |                      | -   |   |                      | -   |   |                      |
| 1 | <a href="#">1741</a> | 137  | bi  | 1 | <a href="#">2182</a> | -   |   |                      | -   |   |                      | -   |   |                      |
| 1 | <a href="#">1742</a> | 397  | bi  | 1 | <a href="#">1025</a> | -   |   |                      | -   |   |                      | bi  | 1 | <a href="#">424</a>  |
| 1 | <a href="#">1743</a> | 304  | bi  | 1 | <a href="#">2185</a> | -   |   |                      | bi  | 1 | <a href="#">783</a>  | -   |   |                      |
| 1 | <a href="#">1744</a> | 335  | bi  | 1 | <a href="#">2186</a> | uni | 1 | <a href="#">1962</a> | uni | 1 | <a href="#">782</a>  | uni | 1 | <a href="#">1276</a> |
| 1 | <a href="#">1745</a> | 708  | bi  | 1 | <a href="#">2187</a> | -   |   |                      | uni | 1 | <a href="#">781</a>  | -   |   |                      |
| 1 | <a href="#">1746</a> | 816  | bi  | 1 | <a href="#">2188</a> | -   |   |                      | bi  | 1 | <a href="#">780</a>  | -   |   |                      |
| 1 | <a href="#">1747</a> | 130  | bi  | 1 | <a href="#">2189</a> | -   |   |                      | bi  | 1 | <a href="#">778</a>  | -   |   |                      |
| 1 | <a href="#">1748</a> | 243  | bi  | 1 | <a href="#">2190</a> | -   |   |                      | -   |   |                      | -   |   |                      |
| 1 | <a href="#">1749</a> | 276  | bi  | 1 | <a href="#">2191</a> | -   |   |                      | -   |   |                      | -   |   |                      |

|   |                      |      |    |   |                      |     |   |                      |     |   |                      |    |   |                      |
|---|----------------------|------|----|---|----------------------|-----|---|----------------------|-----|---|----------------------|----|---|----------------------|
| 1 | <a href="#">1750</a> | 168  | bi | 1 | <a href="#">2192</a> | -   |   |                      | bi  | 1 | <a href="#">774</a>  | -  |   |                      |
| 1 | <a href="#">1751</a> | 74   | bi | 1 | <a href="#">2193</a> | -   |   |                      | bi  | 1 | <a href="#">773</a>  | -  |   |                      |
| 1 | <a href="#">1752</a> | 417  | bi | 1 | <a href="#">2194</a> | -   |   |                      | -   |   |                      | -  |   |                      |
| 1 | <a href="#">1753</a> | 45   | bi | 1 | <a href="#">2196</a> | -   |   |                      | -   |   |                      | -  |   |                      |
| 1 | <a href="#">1754</a> | 395  | bi | 1 | <a href="#">2197</a> | -   |   |                      | bi  | 1 | <a href="#">772</a>  | -  |   |                      |
| 1 | <a href="#">1755</a> | 56   | bi | 1 | <a href="#">2198</a> | -   |   |                      | -   |   |                      | -  |   |                      |
| 1 | <a href="#">1756</a> | 44   | bi | 1 | <a href="#">2199</a> | -   |   |                      | -   |   |                      | -  |   |                      |
| 1 | <a href="#">1757</a> | 147  | bi | 1 | <a href="#">2201</a> | -   |   |                      | -   |   |                      | bi | 1 | <a href="#">364</a>  |
| 1 | <a href="#">1758</a> | 119  | bi | 1 | <a href="#">2202</a> | -   |   |                      | bi  | 1 | <a href="#">769</a>  | -  |   |                      |
| 1 | <a href="#">3325</a> | 269  | bi | 1 | <a href="#">2203</a> | -   |   |                      | -   |   |                      | -  |   |                      |
| 1 | <a href="#">3326</a> | 405  | bi | 1 | <a href="#">2204</a> | -   |   |                      | -   |   |                      | -  |   |                      |
| 1 | <a href="#">1759</a> | 339  | bi | 1 | <a href="#">2205</a> | -   |   |                      | uni | 1 | <a href="#">769</a>  | -  |   |                      |
| 1 | <a href="#">1760</a> | 118  | bi | 1 | <a href="#">2206</a> | -   |   |                      | -   |   |                      | -  |   |                      |
| 1 | <a href="#">1761</a> | 125  | bi | 1 | <a href="#">2207</a> | -   |   |                      | bi  | 1 | <a href="#">768</a>  | -  |   |                      |
| 1 | <a href="#">1762</a> | 105  | bi | 1 | <a href="#">2208</a> | -   |   |                      | uni | 1 | <a href="#">767</a>  | -  |   |                      |
| 1 | <a href="#">1763</a> | 1076 | bi | 1 | <a href="#">2209</a> | uni | 1 | <a href="#">1985</a> | bi  | 1 | <a href="#">765</a>  | bi | 1 | <a href="#">1623</a> |
| 1 | <a href="#">1764</a> | 221  | bi | 1 | <a href="#">2210</a> | -   |   |                      | -   |   |                      | bi | 1 | <a href="#">1625</a> |
| 1 | <a href="#">1765</a> | 116  | bi | 1 | <a href="#">2211</a> | bi  | 1 | <a href="#">1573</a> | bi  | 1 | <a href="#">1518</a> | bi | 1 | <a href="#">1626</a> |
| 1 | <a href="#">1766</a> | 247  | bi | 1 | <a href="#">2212</a> | bi  | 1 | <a href="#">1574</a> | bi  | 1 | <a href="#">1519</a> | bi | 1 | <a href="#">1627</a> |
| 1 | <a href="#">1767</a> | 175  | bi | 1 | <a href="#">2213</a> | bi  | 1 | <a href="#">1575</a> | bi  | 1 | <a href="#">1520</a> | bi | 1 | <a href="#">1628</a> |
| 1 | <a href="#">1768</a> | 454  | bi | 1 | <a href="#">2214</a> | bi  | 1 | <a href="#">1576</a> | bi  | 1 | <a href="#">1521</a> | bi | 1 | <a href="#">1629</a> |
| 1 | <a href="#">1769</a> | 125  | bi | 1 | <a href="#">2215</a> | bi  | 1 | <a href="#">1577</a> | bi  | 1 | <a href="#">1522</a> | bi | 1 | <a href="#">1630</a> |
| 1 | <a href="#">1770</a> | 203  | bi | 1 | <a href="#">2216</a> | bi  | 1 | <a href="#">1578</a> | bi  | 1 | <a href="#">1523</a> | bi | 1 | <a href="#">1631</a> |
| 1 | <a href="#">1771</a> | 601  | bi | 1 | <a href="#">2217</a> | bi  | 1 | <a href="#">1579</a> | bi  | 1 | <a href="#">1524</a> | bi | 1 | <a href="#">1632</a> |
| 1 | <a href="#">1772</a> | 42   | -  |   |                      | -   |   |                      | bi  | 1 | <a href="#">2167</a> | -  |   |                      |
| 1 | <a href="#">1773</a> | 229  | bi | 1 | <a href="#">2218</a> | bi  | 1 | <a href="#">1580</a> | bi  | 1 | <a href="#">1525</a> | bi | 1 | <a href="#">1633</a> |
| 1 | <a href="#">1774</a> | 162  | bi | 1 | <a href="#">2219</a> | bi  | 1 | <a href="#">1581</a> | bi  | 1 | <a href="#">1526</a> | bi | 1 | <a href="#">1634</a> |
| 1 | <a href="#">1775</a> | 446  | bi | 1 | <a href="#">2220</a> | bi  | 1 | <a href="#">1582</a> | bi  | 1 | <a href="#">1527</a> | bi | 1 | <a href="#">1636</a> |
| 1 | <a href="#">1776</a> | 315  | bi | 1 | <a href="#">2221</a> | bi  | 1 | <a href="#">1583</a> | bi  | 1 | <a href="#">1528</a> | bi | 1 | <a href="#">1637</a> |
| 1 | <a href="#">1777</a> | 320  | bi | 1 | <a href="#">2222</a> | bi  | 1 | <a href="#">1584</a> | bi  | 1 | <a href="#">1529</a> | bi | 1 | <a href="#">1638</a> |
| 1 | <a href="#">1778</a> | 204  | bi | 1 | <a href="#">2223</a> | bi  | 1 | <a href="#">1585</a> | bi  | 1 | <a href="#">1530</a> | bi | 1 | <a href="#">1639</a> |
| 1 | <a href="#">1779</a> | 294  | bi | 1 | <a href="#">2224</a> | bi  | 1 | <a href="#">1586</a> | bi  | 1 | <a href="#">1531</a> | bi | 1 | <a href="#">1640</a> |
| 1 | <a href="#">1780</a> | 101  | bi | 1 | <a href="#">2225</a> | bi  | 1 | <a href="#">1587</a> | bi  | 1 | <a href="#">1532</a> | bi | 1 | <a href="#">1641</a> |
| 1 | <a href="#">1781</a> | 33   | -  |   |                      | -   |   |                      | -   |   |                      | -  |   |                      |
| 1 | <a href="#">1782</a> | 51   | -  |   |                      | bi  | 1 | <a href="#">1588</a> | bi  | 1 | <a href="#">1533</a> | bi | 1 | <a href="#">1642</a> |
| 1 | <a href="#">1783</a> | 194  | bi | 1 | <a href="#">2226</a> | bi  | 1 | <a href="#">1589</a> | bi  | 1 | <a href="#">1534</a> | bi | 1 | <a href="#">1643</a> |
| 1 | <a href="#">1784</a> | 418  | bi | 1 | <a href="#">2227</a> | bi  | 1 | <a href="#">1590</a> | bi  | 1 | <a href="#">1535</a> | bi | 1 | <a href="#">1644</a> |
| 1 | <a href="#">1785</a> | 343  | bi | 1 | <a href="#">2228</a> | bi  | 1 | <a href="#">1591</a> | bi  | 1 | <a href="#">1536</a> | bi | 1 | <a href="#">1645</a> |
| 1 | <a href="#">1786</a> | 163  | bi | 1 | <a href="#">2229</a> | bi  | 1 | <a href="#">1592</a> | bi  | 1 | <a href="#">1537</a> | bi | 1 | <a href="#">1646</a> |
| 1 | <a href="#">1787</a> | 458  | bi | 1 | <a href="#">2230</a> | bi  | 1 | <a href="#">1593</a> | bi  | 1 | <a href="#">1538</a> | bi | 1 | <a href="#">1647</a> |
| 1 | <a href="#">1788</a> | 307  | bi | 1 | <a href="#">2231</a> | bi  | 1 | <a href="#">1594</a> | bi  | 1 | <a href="#">1539</a> | bi | 1 | <a href="#">1648</a> |
| 1 | <a href="#">1789</a> | 637  | bi | 1 | <a href="#">2232</a> | bi  | 1 | <a href="#">1595</a> | bi  | 1 | <a href="#">1540</a> | bi | 1 | <a href="#">1649</a> |
| 1 | <a href="#">1790</a> | 481  | bi | 1 | <a href="#">2233</a> | bi  | 1 | <a href="#">1596</a> | bi  | 1 | <a href="#">1541</a> | bi | 1 | <a href="#">1650</a> |
| 1 | <a href="#">1791</a> | 282  | bi | 1 | <a href="#">2235</a> | bi  | 1 | <a href="#">1597</a> | bi  | 1 | <a href="#">1542</a> | bi | 1 | <a href="#">1651</a> |
| 1 | <a href="#">1792</a> | 180  | bi | 1 | <a href="#">2236</a> | bi  | 1 | <a href="#">1598</a> | bi  | 1 | <a href="#">1543</a> | bi | 1 | <a href="#">1652</a> |
| 1 | <a href="#">1793</a> | 235  | bi | 1 | <a href="#">2237</a> | bi  | 1 | <a href="#">1599</a> | bi  | 1 | <a href="#">1544</a> | bi | 1 | <a href="#">1653</a> |
| 1 | <a href="#">1794</a> | 610  | bi | 1 | <a href="#">2238</a> | bi  | 1 | <a href="#">1600</a> | bi  | 1 | <a href="#">1545</a> | bi | 1 | <a href="#">1654</a> |
| 1 | <a href="#">1795</a> | 502  | bi | 1 | <a href="#">2239</a> | bi  | 1 | <a href="#">1601</a> | bi  | 1 | <a href="#">1546</a> | bi | 1 | <a href="#">1655</a> |
| 1 | <a href="#">1796</a> | 489  | bi | 1 | <a href="#">2241</a> | bi  | 1 | <a href="#">1602</a> | bi  | 1 | <a href="#">1547</a> | bi | 1 | <a href="#">1656</a> |
| 1 | <a href="#">1797</a> | 445  | bi | 1 | <a href="#">2242</a> | bi  | 1 | <a href="#">1603</a> | bi  | 1 | <a href="#">1548</a> | bi | 1 | <a href="#">1657</a> |
| 1 | <a href="#">1798</a> | 119  | bi | 1 | <a href="#">2243</a> | bi  | 1 | <a href="#">1604</a> | bi  | 1 | <a href="#">1549</a> | bi | 1 | <a href="#">1660</a> |
| 1 | <a href="#">1799</a> | 54   | bi | 1 | <a href="#">2244</a> | bi  | 1 | <a href="#">1605</a> | bi  | 1 | <a href="#">1550</a> | bi | 1 | <a href="#">1661</a> |
| 1 | <a href="#">1800</a> | 50   | bi | 1 | <a href="#">2245</a> | bi  | 1 | <a href="#">1606</a> | -   |   |                      | bi | 1 | <a href="#">1662</a> |
| 1 | <a href="#">1801</a> | 145  | bi | 1 | <a href="#">2246</a> | bi  | 1 | <a href="#">1607</a> | bi  | 1 | <a href="#">1554</a> | bi | 1 | <a href="#">1663</a> |
| 1 | <a href="#">1802</a> | 179  | bi | 1 | <a href="#">2247</a> | bi  | 1 | <a href="#">1608</a> | bi  | 1 | <a href="#">1555</a> | bi | 1 | <a href="#">1664</a> |
| 1 | <a href="#">1803</a> | 902  | bi | 1 | <a href="#">2249</a> | bi  | 1 | <a href="#">1609</a> | bi  | 1 | <a href="#">1556</a> | bi | 1 | <a href="#">1665</a> |
| 1 | <a href="#">1804</a> | 217  | bi | 1 | <a href="#">2250</a> | bi  | 1 | <a href="#">1610</a> | bi  | 1 | <a href="#">1557</a> | bi | 1 | <a href="#">1666</a> |



|   |                      |     |     |   |                      |     |   |                      |     |   |                      |     |   |                      |
|---|----------------------|-----|-----|---|----------------------|-----|---|----------------------|-----|---|----------------------|-----|---|----------------------|
| 1 | <a href="#">1805</a> | 222 | bi  | 1 | <a href="#">2251</a> | bi  | 1 | <a href="#">1611</a> | bi  | 1 | <a href="#">1558</a> | bi  | 1 | <a href="#">1667</a> |
| 1 | <a href="#">1806</a> | 132 | bi  | 1 | <a href="#">2252</a> | bi  | 1 | <a href="#">1612</a> | bi  | 1 | <a href="#">1559</a> | bi  | 1 | <a href="#">1668</a> |
| 1 | <a href="#">1807</a> | 394 | bi  | 1 | <a href="#">2253</a> | bi  | 1 | <a href="#">1613</a> | bi  | 1 | <a href="#">1560</a> | bi  | 1 | <a href="#">1669</a> |
| 1 | <a href="#">1808</a> | 48  | -   |   |                      | -   |   |                      | bi  | 1 | <a href="#">105</a>  | -   |   |                      |
| 1 | <a href="#">1809</a> | 612 | bi  | 1 | <a href="#">2254</a> | bi  | 1 | <a href="#">1614</a> | bi  | 1 | <a href="#">1561</a> | bi  | 1 | <a href="#">1670</a> |
| 1 | <a href="#">1810</a> | 34  | -   |   |                      | -   |   |                      | -   |   |                      | -   |   |                      |
| 1 | <a href="#">1811</a> | 50  | bi  | 1 | <a href="#">2255</a> | bi  | 1 | <a href="#">1615</a> | bi  | 1 | <a href="#">1562</a> | bi  | 1 | <a href="#">1671</a> |
| 1 | <a href="#">1812</a> | 117 | bi  | 1 | <a href="#">2256</a> | bi  | 1 | <a href="#">1616</a> | bi  | 1 | <a href="#">1563</a> | bi  | 1 | <a href="#">1672</a> |
| 1 | <a href="#">1813</a> | 117 | bi  | 1 | <a href="#">2257</a> | bi  | 1 | <a href="#">1617</a> | bi  | 1 | <a href="#">1564</a> | bi  | 1 | <a href="#">1673</a> |
| 1 | <a href="#">1814</a> | 335 | bi  | 1 | <a href="#">2258</a> | bi  | 1 | <a href="#">1618</a> | bi  | 1 | <a href="#">1565</a> | bi  | 1 | <a href="#">1674</a> |
| 1 | <a href="#">1815</a> | 359 | bi  | 1 | <a href="#">2259</a> | bi  | 1 | <a href="#">1619</a> | bi  | 1 | <a href="#">1566</a> | bi  | 1 | <a href="#">1675</a> |
| 1 | <a href="#">1816</a> | 277 | bi  | 1 | <a href="#">2260</a> | bi  | 1 | <a href="#">1620</a> | bi  | 1 | <a href="#">1567</a> | bi  | 1 | <a href="#">1676</a> |
| 1 | <a href="#">1817</a> | 264 | bi  | 1 | <a href="#">2261</a> | bi  | 1 | <a href="#">1621</a> | bi  | 1 | <a href="#">1568</a> | bi  | 1 | <a href="#">1677</a> |
| 1 | <a href="#">3327</a> | 157 | bi  | 1 | <a href="#">2262</a> | bi  | 1 | <a href="#">1622</a> | bi  | 1 | <a href="#">1569</a> | bi  | 1 | <a href="#">1679</a> |
| 1 | <a href="#">3328</a> | 140 | bi  | 1 | <a href="#">2263</a> | bi  | 1 | <a href="#">1623</a> | bi  | 1 | <a href="#">1570</a> | bi  | 1 | <a href="#">1680</a> |
| 1 | <a href="#">1818</a> | 924 | bi  | 1 | <a href="#">2264</a> | bi  | 1 | <a href="#">1624</a> | bi  | 1 | <a href="#">1571</a> | bi  | 1 | <a href="#">1681</a> |
| 1 | <a href="#">1819</a> | 72  | -   |   |                      | -   |   |                      | -   |   |                      | -   |   |                      |
| 1 | <a href="#">1820</a> | 454 | bi  | 1 | <a href="#">2265</a> | bi  | 1 | <a href="#">1625</a> | -   |   |                      | bi  | 1 | <a href="#">1682</a> |
| 1 | <a href="#">1821</a> | 275 | bi  | 1 | <a href="#">2266</a> | bi  | 1 | <a href="#">1626</a> | -   |   |                      | bi  | 1 | <a href="#">1683</a> |
| 1 | <a href="#">1822</a> | 433 | bi  | 1 | <a href="#">2267</a> | bi  | 1 | <a href="#">1627</a> | bi  | 1 | <a href="#">1576</a> | bi  | 1 | <a href="#">1684</a> |
| 1 | <a href="#">1823</a> | 252 | bi  | 1 | <a href="#">2268</a> | bi  | 1 | <a href="#">1628</a> | bi  | 1 | <a href="#">1577</a> | bi  | 1 | <a href="#">1685</a> |
| 1 | <a href="#">1824</a> | 398 | bi  | 1 | <a href="#">2269</a> | bi  | 1 | <a href="#">1629</a> | bi  | 1 | <a href="#">1578</a> | bi  | 1 | <a href="#">1686</a> |
| 1 | <a href="#">1825</a> | 334 | bi  | 1 | <a href="#">2270</a> | bi  | 1 | <a href="#">1630</a> | bi  | 1 | <a href="#">1579</a> | bi  | 1 | <a href="#">1687</a> |
| 1 | <a href="#">1826</a> | 346 | bi  | 1 | <a href="#">2271</a> | bi  | 1 | <a href="#">1631</a> | bi  | 1 | <a href="#">1580</a> | bi  | 1 | <a href="#">1688</a> |
| 1 | <a href="#">1827</a> | 293 | bi  | 1 | <a href="#">2272</a> | bi  | 1 | <a href="#">1632</a> | bi  | 1 | <a href="#">1581</a> | bi  | 1 | <a href="#">1689</a> |
| 1 | <a href="#">1828</a> | 190 | bi  | 1 | <a href="#">2273</a> | bi  | 1 | <a href="#">1633</a> | bi  | 1 | <a href="#">1582</a> | bi  | 1 | <a href="#">1690</a> |
| 1 | <a href="#">1829</a> | 173 | bi  | 1 | <a href="#">2274</a> | bi  | 1 | <a href="#">1634</a> | bi  | 1 | <a href="#">1583</a> | bi  | 1 | <a href="#">1691</a> |
| 1 | <a href="#">1830</a> | 272 | bi  | 1 | <a href="#">2275</a> | bi  | 1 | <a href="#">1635</a> | bi  | 1 | <a href="#">1584</a> | bi  | 1 | <a href="#">1692</a> |
| 1 | <a href="#">1831</a> | 590 | bi  | 1 | <a href="#">2276</a> | bi  | 1 | <a href="#">1636</a> | bi  | 1 | <a href="#">1585</a> | bi  | 1 | <a href="#">1693</a> |
| 1 | <a href="#">1832</a> | 434 | bi  | 1 | <a href="#">2277</a> | bi  | 1 | <a href="#">1637</a> | bi  | 1 | <a href="#">1586</a> | bi  | 1 | <a href="#">1694</a> |
| 1 | <a href="#">1833</a> | 83  | -   |   |                      | -   |   |                      | -   |   |                      | -   |   |                      |
| 1 | <a href="#">1834</a> | 149 | bi  | 1 | <a href="#">2278</a> | bi  | 1 | <a href="#">1638</a> | bi  | 1 | <a href="#">1587</a> | bi  | 1 | <a href="#">1695</a> |
| 1 | <a href="#">1835</a> | 738 | bi  | 1 | <a href="#">2279</a> | bi  | 1 | <a href="#">1639</a> | bi  | 1 | <a href="#">1588</a> | bi  | 1 | <a href="#">1696</a> |
| 1 | <a href="#">1836</a> | 251 | bi  | 1 | <a href="#">2280</a> | bi  | 1 | <a href="#">1640</a> | bi  | 1 | <a href="#">1589</a> | bi  | 1 | <a href="#">1697</a> |
| 1 | <a href="#">1837</a> | 316 | bi  | 1 | <a href="#">2281</a> | bi  | 1 | <a href="#">1641</a> | bi  | 1 | <a href="#">1590</a> | bi  | 1 | <a href="#">1698</a> |
| 1 | <a href="#">1838</a> | 162 | bi  | 1 | <a href="#">2282</a> | bi  | 1 | <a href="#">1642</a> | bi  | 1 | <a href="#">1591</a> | bi  | 1 | <a href="#">1699</a> |
| 1 | <a href="#">1839</a> | 230 | bi  | 1 | <a href="#">2283</a> | bi  | 1 | <a href="#">1643</a> | bi  | 1 | <a href="#">1592</a> | bi  | 1 | <a href="#">1700</a> |
| 1 | <a href="#">1840</a> | 426 | bi  | 1 | <a href="#">2284</a> | bi  | 1 | <a href="#">1644</a> | bi  | 1 | <a href="#">1593</a> | bi  | 1 | <a href="#">1701</a> |
| 1 | <a href="#">1841</a> | 111 | bi  | 1 | <a href="#">2285</a> | bi  | 1 | <a href="#">1645</a> | bi  | 1 | <a href="#">1594</a> | bi  | 1 | <a href="#">1702</a> |
| 1 | <a href="#">1842</a> | 98  | -   |   |                      | -   |   |                      | uni | 1 | <a href="#">672</a>  | -   |   |                      |
| 1 | <a href="#">1843</a> | 158 | bi  | 1 | <a href="#">2286</a> | bi  | 1 | <a href="#">1646</a> | bi  | 1 | <a href="#">1595</a> | bi  | 1 | <a href="#">1704</a> |
| 1 | <a href="#">1844</a> | 396 | bi  | 1 | <a href="#">2287</a> | bi  | 1 | <a href="#">1647</a> | bi  | 1 | <a href="#">1596</a> | bi  | 1 | <a href="#">1705</a> |
| 1 | <a href="#">3329</a> | 65  | uni | 1 | <a href="#">2288</a> | bi  | 1 | <a href="#">1648</a> | uni | 1 | <a href="#">1597</a> | uni | 1 | <a href="#">1706</a> |
| 1 | <a href="#">3330</a> | 262 | bi  | 1 | <a href="#">2288</a> | uni | 1 | <a href="#">1648</a> | bi  | 1 | <a href="#">1597</a> | bi  | 1 | <a href="#">1706</a> |
| 1 | <a href="#">1845</a> | 118 | bi  | 1 | <a href="#">2289</a> | bi  | 1 | <a href="#">1649</a> | bi  | 1 | <a href="#">1598</a> | bi  | 1 | <a href="#">1707</a> |
| 1 | <a href="#">1846</a> | 145 | bi  | 1 | <a href="#">2290</a> | bi  | 1 | <a href="#">1650</a> | bi  | 1 | <a href="#">1599</a> | bi  | 1 | <a href="#">1708</a> |
| 1 | <a href="#">1847</a> | 156 | bi  | 1 | <a href="#">2291</a> | bi  | 1 | <a href="#">1651</a> | -   |   |                      | -   |   |                      |
| 1 | <a href="#">1848</a> | 42  | bi  | 1 | <a href="#">2292</a> | bi  | 1 | <a href="#">1652</a> | -   |   |                      | -   |   |                      |
| 1 | <a href="#">1849</a> | 314 | bi  | 1 | <a href="#">2293</a> | bi  | 1 | <a href="#">1653</a> | -   |   |                      | -   |   |                      |
| 1 | <a href="#">1850</a> | 74  | bi  | 1 | <a href="#">2294</a> | bi  | 1 | <a href="#">1654</a> | -   |   |                      | -   |   |                      |
| 1 | <a href="#">1851</a> | 67  | bi  | 1 | <a href="#">2295</a> | bi  | 1 | <a href="#">1656</a> | uni | 1 | <a href="#">501</a>  | uni | 1 | <a href="#">622</a>  |
| 1 | <a href="#">1852</a> | 414 | bi  | 1 | <a href="#">2296</a> | bi  | 1 | <a href="#">1657</a> | uni | 1 | <a href="#">518</a>  | uni | 1 | <a href="#">2335</a> |
| 1 | <a href="#">1853</a> | 78  | bi  | 1 | <a href="#">2297</a> | -   |   |                      | -   |   |                      | -   |   |                      |
| 1 | <a href="#">3331</a> | 74  | bi  | 1 | <a href="#">2298</a> | -   |   |                      | -   |   |                      | -   |   |                      |
| 1 | <a href="#">1854</a> | 52  | bi  | 1 | <a href="#">2299</a> | bi  | 1 | <a href="#">2437</a> | -   |   |                      | bi  | 1 | <a href="#">2338</a> |
| 1 | <a href="#">1855</a> | 107 | bi  | 1 | <a href="#">2300</a> | bi  | 1 | <a href="#">2438</a> | -   |   |                      | bi  | 1 | <a href="#">2339</a> |
| 1 | <a href="#">3332</a> | 164 | bi  | 1 | <a href="#">2301</a> | bi  | 1 | <a href="#">2439</a> | -   |   |                      | bi  | 1 | <a href="#">2340</a> |

|   |                      |     |    |   |                      |     |   |                      |     |   |                      |     |   |                      |
|---|----------------------|-----|----|---|----------------------|-----|---|----------------------|-----|---|----------------------|-----|---|----------------------|
| 1 | <a href="#">3333</a> | 96  | bi | 1 | <a href="#">2302</a> | bi  | 1 | <a href="#">1662</a> | -   |   |                      | uni | 1 | <a href="#">2341</a> |
| 1 | <a href="#">3334</a> | 199 | bi | 1 | <a href="#">2303</a> | bi  | 1 | <a href="#">1663</a> | -   |   |                      | uni | 1 | <a href="#">2342</a> |
| 1 | <a href="#">3335</a> | 226 | bi | 1 | <a href="#">2304</a> | bi  | 1 | <a href="#">1664</a> | -   |   |                      | uni | 1 | <a href="#">2343</a> |
| 1 | <a href="#">1856</a> | 931 | bi | 1 | <a href="#">2305</a> | bi  | 1 | <a href="#">1665</a> | -   |   |                      | uni | 1 | <a href="#">2344</a> |
| 1 | <a href="#">1857</a> | 245 | bi | 1 | <a href="#">2306</a> | bi  | 1 | <a href="#">1666</a> | -   |   |                      | bi  | 1 | <a href="#">1497</a> |
| 1 | <a href="#">1858</a> | 975 | bi | 1 | <a href="#">2307</a> | bi  | 1 | <a href="#">1667</a> | uni | 1 | <a href="#">1025</a> | uni | 1 | <a href="#">1813</a> |
| 1 | <a href="#">1859</a> | 117 | bi | 1 | <a href="#">2308</a> | bi  | 1 | <a href="#">1668</a> | -   |   |                      | -   |   |                      |
| 1 | <a href="#">1860</a> | 283 | bi | 1 | <a href="#">2309</a> | bi  | 1 | <a href="#">1669</a> | -   |   |                      | -   |   |                      |
| 1 | <a href="#">1861</a> | 125 | bi | 1 | <a href="#">2310</a> | bi  | 1 | <a href="#">1670</a> | -   |   |                      | -   |   |                      |
| 1 | <a href="#">1862</a> | 133 | bi | 1 | <a href="#">2311</a> | bi  | 1 | <a href="#">1671</a> | -   |   |                      | -   |   |                      |
| 1 | <a href="#">1863</a> | 100 | bi | 1 | <a href="#">2312</a> | bi  | 1 | <a href="#">1672</a> | -   |   |                      | -   |   |                      |
| 1 | <a href="#">3336</a> | 115 | bi | 1 | <a href="#">2313</a> | bi  | 1 | <a href="#">1673</a> | -   |   |                      | -   |   |                      |
| 1 | <a href="#">1864</a> | 61  | bi | 1 | <a href="#">2314</a> | bi  | 1 | <a href="#">1674</a> | -   |   |                      | -   |   |                      |
| 1 | <a href="#">1865</a> | 296 | bi | 1 | <a href="#">2315</a> | bi  | 1 | <a href="#">1675</a> | -   |   |                      | -   |   |                      |
| 1 | <a href="#">1866</a> | 208 | bi | 1 | <a href="#">2316</a> | bi  | 1 | <a href="#">1676</a> | -   |   |                      | -   |   |                      |
| 1 | <a href="#">1867</a> | 107 | bi | 1 | <a href="#">2317</a> | bi  | 1 | <a href="#">1677</a> | -   |   |                      | -   |   |                      |
| 1 | <a href="#">1868</a> | 77  | bi | 1 | <a href="#">2318</a> | -   |   |                      | -   |   |                      | -   |   |                      |
| 1 | <a href="#">1869</a> | 635 | bi | 1 | <a href="#">2319</a> | bi  | 1 | <a href="#">1679</a> | -   |   |                      | -   |   |                      |
| 1 | <a href="#">1870</a> | 491 | bi | 1 | <a href="#">2320</a> | bi  | 1 | <a href="#">1680</a> | -   |   |                      | -   |   |                      |
| 1 | <a href="#">1871</a> | 464 | -  |   |                      | -   |   |                      | -   |   |                      | -   |   |                      |
| 1 | <a href="#">1872</a> | 154 | -  |   |                      | uni | 1 | <a href="#">271</a>  | -   |   |                      | -   |   |                      |
| 1 | <a href="#">1873</a> | 65  | -  |   |                      | -   |   |                      | -   |   |                      | -   |   |                      |
| 1 | <a href="#">1874</a> | 271 | -  |   |                      | -   |   |                      | -   |   |                      | -   |   |                      |
| 1 | <a href="#">1875</a> | 56  | bi | 1 | <a href="#">1340</a> | -   |   |                      | -   |   |                      | -   |   |                      |
| 1 | <a href="#">1876</a> | 308 | -  |   |                      | -   |   |                      | -   |   |                      | -   |   |                      |
| 1 | <a href="#">1877</a> | 97  | -  |   |                      | -   |   |                      | -   |   |                      | -   |   |                      |
| 1 | <a href="#">1878</a> | 139 | bi | 1 | <a href="#">1339</a> | bi  | 1 | <a href="#">1684</a> | -   |   |                      | bi  | 1 | <a href="#">1516</a> |
| 1 | <a href="#">1879</a> | 87  | -  |   |                      | -   |   |                      | -   |   |                      | -   |   |                      |
| 1 | <a href="#">3337</a> | 86  | bi | 1 | <a href="#">2328</a> | bi  | 1 | <a href="#">1691</a> | -   |   |                      | -   |   |                      |
| 1 | <a href="#">1880</a> | 286 | bi | 1 | <a href="#">1330</a> | bi  | 1 | <a href="#">1694</a> | -   |   |                      | bi  | 1 | <a href="#">1848</a> |
| 1 | <a href="#">1881</a> | 67  | -  |   |                      | -   |   |                      | -   |   |                      | -   |   |                      |
| 1 | <a href="#">3338</a> | 128 | bi | 1 | <a href="#">1329</a> | -   |   |                      | -   |   |                      | bi  | 1 | <a href="#">1849</a> |
| 1 | <a href="#">1882</a> | 245 | bi | 1 | <a href="#">1327</a> | -   |   |                      | -   |   |                      | bi  | 1 | <a href="#">1531</a> |
| 1 | <a href="#">1883</a> | 106 | -  |   |                      | -   |   |                      | -   |   |                      | -   |   |                      |
| 1 | <a href="#">1884</a> | 38  | bi | 1 | <a href="#">1325</a> | -   |   |                      | -   |   |                      | bi  | 1 | <a href="#">1534</a> |
| 1 | <a href="#">1885</a> | 113 | bi | 1 | <a href="#">1324</a> | bi  | 1 | <a href="#">1699</a> | -   |   |                      | uni | 1 | <a href="#">2374</a> |
| 1 | <a href="#">1886</a> | 63  | bi | 1 | <a href="#">1320</a> | bi  | 1 | <a href="#">1702</a> | -   |   |                      | -   |   |                      |
| 1 | <a href="#">1887</a> | 241 | bi | 1 | <a href="#">1319</a> | bi  | 1 | <a href="#">1703</a> | -   |   |                      | bi  | 1 | <a href="#">1537</a> |
| 1 | <a href="#">1888</a> | 104 | bi | 1 | <a href="#">2341</a> | bi  | 1 | <a href="#">1704</a> | -   |   |                      | -   |   |                      |
| 1 | <a href="#">1889</a> | 64  | bi | 1 | <a href="#">2342</a> | bi  | 1 | <a href="#">1705</a> | -   |   |                      | -   |   |                      |
| 1 | <a href="#">1890</a> | 114 | bi | 1 | <a href="#">2343</a> | bi  | 1 | <a href="#">1706</a> | uni | 1 | <a href="#">1122</a> | uni | 1 | <a href="#">2378</a> |
| 1 | <a href="#">1891</a> | 217 | bi | 1 | <a href="#">2344</a> | bi  | 1 | <a href="#">1707</a> | -   |   |                      | -   |   |                      |
| 1 | <a href="#">1892</a> | 205 | -  |   |                      | -   |   |                      | -   |   |                      | -   |   |                      |
| 1 | <a href="#">1893</a> | 383 | bi | 1 | <a href="#">2347</a> | bi  | 1 | <a href="#">1710</a> | uni | 1 | <a href="#">1219</a> | uni | 1 | <a href="#">1546</a> |
| 1 | <a href="#">3339</a> | 168 | bi | 1 | <a href="#">2348</a> | bi  | 1 | <a href="#">1711</a> | bi  | 1 | <a href="#">1600</a> | bi  | 1 | <a href="#">1709</a> |
| 1 | <a href="#">1894</a> | 92  | bi | 1 | <a href="#">2349</a> | bi  | 1 | <a href="#">1712</a> | bi  | 1 | <a href="#">1601</a> | bi  | 1 | <a href="#">1710</a> |
| 1 | <a href="#">1895</a> | 349 | bi | 1 | <a href="#">2350</a> | bi  | 1 | <a href="#">1713</a> | bi  | 1 | <a href="#">1602</a> | bi  | 1 | <a href="#">1711</a> |
| 1 | <a href="#">1896</a> | 323 | bi | 1 | <a href="#">2351</a> | bi  | 1 | <a href="#">1714</a> | bi  | 1 | <a href="#">1603</a> | bi  | 1 | <a href="#">1712</a> |
| 1 | <a href="#">1897</a> | 500 | bi | 1 | <a href="#">2352</a> | bi  | 1 | <a href="#">1715</a> | bi  | 1 | <a href="#">1604</a> | bi  | 1 | <a href="#">1713</a> |
| 1 | <a href="#">1898</a> | 358 | bi | 1 | <a href="#">2353</a> | bi  | 1 | <a href="#">1716</a> | bi  | 1 | <a href="#">1605</a> | bi  | 1 | <a href="#">1714</a> |
| 1 | <a href="#">1899</a> | 610 | bi | 1 | <a href="#">2354</a> | bi  | 1 | <a href="#">1717</a> | bi  | 1 | <a href="#">1606</a> | bi  | 1 | <a href="#">1715</a> |
| 1 | <a href="#">1900</a> | 250 | bi | 1 | <a href="#">2355</a> | bi  | 1 | <a href="#">1718</a> | bi  | 1 | <a href="#">1607</a> | bi  | 1 | <a href="#">1716</a> |
| 1 | <a href="#">1901</a> | 234 | bi | 1 | <a href="#">2356</a> | bi  | 1 | <a href="#">1719</a> | bi  | 1 | <a href="#">1608</a> | bi  | 1 | <a href="#">1717</a> |
| 1 | <a href="#">1902</a> | 808 | bi | 1 | <a href="#">2357</a> | bi  | 1 | <a href="#">1720</a> | bi  | 1 | <a href="#">1609</a> | bi  | 1 | <a href="#">1718</a> |
| 1 | <a href="#">1903</a> | 404 | bi | 1 | <a href="#">2358</a> | bi  | 1 | <a href="#">1722</a> | bi  | 1 | <a href="#">1611</a> | bi  | 1 | <a href="#">1719</a> |
| 1 | <a href="#">1904</a> | 302 | bi | 1 | <a href="#">2359</a> | bi  | 1 | <a href="#">1723</a> | bi  | 1 | <a href="#">1612</a> | bi  | 1 | <a href="#">1720</a> |
| 1 | <a href="#">1905</a> | 327 | bi | 1 | <a href="#">2360</a> | bi  | 1 | <a href="#">1724</a> | bi  | 1 | <a href="#">1613</a> | bi  | 1 | <a href="#">1721</a> |

|   |                      |      |     |   |                      |     |   |                      |    |   |                      |     |   |                      |
|---|----------------------|------|-----|---|----------------------|-----|---|----------------------|----|---|----------------------|-----|---|----------------------|
| 1 | <a href="#">1906</a> | 589  | bi  | 1 | <a href="#">2361</a> | bi  | 1 | <a href="#">1725</a> | bi | 1 | <a href="#">1614</a> | bi  | 1 | <a href="#">1722</a> |
| 1 | <a href="#">1907</a> | 578  | bi  | 1 | <a href="#">2362</a> | bi  | 1 | <a href="#">1726</a> | bi | 1 | <a href="#">1615</a> | bi  | 1 | <a href="#">1723</a> |
| 1 | <a href="#">1908</a> | 338  | bi  | 1 | <a href="#">2363</a> | bi  | 1 | <a href="#">1727</a> | bi | 1 | <a href="#">1616</a> | bi  | 1 | <a href="#">1724</a> |
| 1 | <a href="#">1909</a> | 473  | bi  | 1 | <a href="#">2364</a> | bi  | 1 | <a href="#">1728</a> | bi | 1 | <a href="#">1617</a> | bi  | 1 | <a href="#">1725</a> |
| 1 | <a href="#">1910</a> | 33   | -   |   |                      | -   |   |                      | -  |   |                      | -   |   |                      |
| 1 | <a href="#">1911</a> | 288  | bi  | 1 | <a href="#">2365</a> | bi  | 1 | <a href="#">1730</a> | bi | 1 | <a href="#">1619</a> | bi  | 1 | <a href="#">1726</a> |
| 1 | <a href="#">1912</a> | 694  | bi  | 1 | <a href="#">2366</a> | bi  | 1 | <a href="#">1731</a> | bi | 1 | <a href="#">1620</a> | bi  | 1 | <a href="#">1727</a> |
| 1 | <a href="#">1913</a> | 122  | bi  | 1 | <a href="#">2367</a> | bi  | 1 | <a href="#">1732</a> | bi | 1 | <a href="#">1621</a> | bi  | 1 | <a href="#">1728</a> |
| 1 | <a href="#">1914</a> | 190  | bi  | 1 | <a href="#">2368</a> | bi  | 1 | <a href="#">1733</a> | bi | 1 | <a href="#">1622</a> | bi  | 1 | <a href="#">1729</a> |
| 1 | <a href="#">1915</a> | 172  | bi  | 1 | <a href="#">2369</a> | bi  | 1 | <a href="#">1734</a> | bi | 1 | <a href="#">1623</a> | bi  | 1 | <a href="#">1730</a> |
| 1 | <a href="#">1916</a> | 413  | bi  | 1 | <a href="#">2370</a> | bi  | 1 | <a href="#">1735</a> | bi | 1 | <a href="#">1624</a> | bi  | 1 | <a href="#">1731</a> |
| 1 | <a href="#">1917</a> | 50   | -   |   |                      | -   |   |                      | -  |   |                      | -   |   |                      |
| 1 | <a href="#">1918</a> | 375  | bi  | 1 | <a href="#">2372</a> | bi  | 1 | <a href="#">1736</a> | bi | 1 | <a href="#">1625</a> | bi  | 1 | <a href="#">1732</a> |
| 1 | <a href="#">1919</a> | 115  | bi  | 1 | <a href="#">2373</a> | bi  | 1 | <a href="#">1737</a> | bi | 1 | <a href="#">1626</a> | bi  | 1 | <a href="#">1733</a> |
| 1 | <a href="#">1920</a> | 382  | bi  | 1 | <a href="#">2374</a> | bi  | 1 | <a href="#">1738</a> | bi | 1 | <a href="#">1627</a> | bi  | 1 | <a href="#">1734</a> |
| 1 | <a href="#">1921</a> | 325  | bi  | 1 | <a href="#">2375</a> | bi  | 1 | <a href="#">1739</a> | bi | 1 | <a href="#">1628</a> | bi  | 1 | <a href="#">1735</a> |
| 1 | <a href="#">1922</a> | 250  | bi  | 1 | <a href="#">2376</a> | bi  | 1 | <a href="#">1740</a> | bi | 1 | <a href="#">1629</a> | bi  | 1 | <a href="#">1736</a> |
| 1 | <a href="#">1923</a> | 290  | bi  | 1 | <a href="#">2377</a> | bi  | 1 | <a href="#">1741</a> | bi | 1 | <a href="#">1630</a> | bi  | 1 | <a href="#">1737</a> |
| 1 | <a href="#">1924</a> | 309  | bi  | 1 | <a href="#">2378</a> | bi  | 1 | <a href="#">1742</a> | bi | 1 | <a href="#">1631</a> | bi  | 1 | <a href="#">1738</a> |
| 1 | <a href="#">1925</a> | 513  | bi  | 1 | <a href="#">2379</a> | bi  | 1 | <a href="#">1743</a> | bi | 1 | <a href="#">1632</a> | bi  | 1 | <a href="#">1739</a> |
| 1 | <a href="#">1926</a> | 36   | bi  | 1 | <a href="#">2380</a> | bi  | 1 | <a href="#">1744</a> | bi | 1 | <a href="#">1633</a> | bi  | 1 | <a href="#">1740</a> |
| 1 | <a href="#">1927</a> | 398  | bi  | 1 | <a href="#">2381</a> | bi  | 1 | <a href="#">1745</a> | bi | 1 | <a href="#">1634</a> | bi  | 1 | <a href="#">1741</a> |
| 1 | <a href="#">1928</a> | 278  | bi  | 1 | <a href="#">2382</a> | bi  | 1 | <a href="#">1746</a> | bi | 1 | <a href="#">1635</a> | bi  | 1 | <a href="#">1742</a> |
| 1 | <a href="#">1929</a> | 227  | bi  | 1 | <a href="#">2383</a> | bi  | 1 | <a href="#">1747</a> | bi | 1 | <a href="#">1636</a> | bi  | 1 | <a href="#">1743</a> |
| 1 | <a href="#">1930</a> | 357  | bi  | 1 | <a href="#">2384</a> | bi  | 1 | <a href="#">1748</a> | bi | 1 | <a href="#">1637</a> | bi  | 1 | <a href="#">1744</a> |
| 1 | <a href="#">1931</a> | 69   | -   |   |                      | -   |   |                      | -  |   |                      | -   |   |                      |
| 1 | <a href="#">1932</a> | 83   | -   |   |                      | uni | 1 | <a href="#">2257</a> | -  |   |                      | -   |   |                      |
| 1 | <a href="#">1933</a> | 323  | -   |   |                      | -   |   |                      | -  |   |                      | -   |   |                      |
| 1 | <a href="#">1934</a> | 329  | uni | 1 | <a href="#">2412</a> | uni | 1 | <a href="#">1657</a> | -  |   |                      | bi  | 1 | <a href="#">1492</a> |
| 1 | <a href="#">1935</a> | 93   | -   |   |                      | -   |   |                      | -  |   |                      | -   |   |                      |
| 1 | <a href="#">1936</a> | 85   | -   |   |                      | -   |   |                      | -  |   |                      | -   |   |                      |
| 1 | <a href="#">1937</a> | 140  | -   |   |                      | -   |   |                      | -  |   |                      | -   |   |                      |
| 1 | <a href="#">1938</a> | 286  | -   |   |                      | -   |   |                      | -  |   |                      | -   |   |                      |
| 1 | <a href="#">1939</a> | 163  | -   |   |                      | -   |   |                      | -  |   |                      | -   |   |                      |
| 1 | <a href="#">1940</a> | 230  | -   |   |                      | -   |   |                      | -  |   |                      | -   |   |                      |
| 1 | <a href="#">1941</a> | 859  | uni | 1 | <a href="#">2305</a> | uni | 1 | <a href="#">2443</a> | -  |   |                      | uni | 1 | <a href="#">2344</a> |
| 1 | <a href="#">1942</a> | 301  | -   |   |                      | -   |   |                      | -  |   |                      | -   |   |                      |
| 1 | <a href="#">1943</a> | 372  | -   |   |                      | -   |   |                      | -  |   |                      | -   |   |                      |
| 1 | <a href="#">1944</a> | 1721 | uni | 1 | <a href="#">2307</a> | uni | 1 | <a href="#">1667</a> | -  |   |                      | bi  | 1 | <a href="#">1813</a> |
| 1 | <a href="#">1945</a> | 102  | -   |   |                      | -   |   |                      | -  |   |                      | -   |   |                      |
| 1 | <a href="#">1946</a> | 187  | -   |   |                      | -   |   |                      | -  |   |                      | -   |   |                      |
| 1 | <a href="#">1947</a> | 445  | -   |   |                      | -   |   |                      | -  |   |                      | -   |   |                      |
| 1 | <a href="#">1948</a> | 147  | -   |   |                      | -   |   |                      | -  |   |                      | -   |   |                      |
| 1 | <a href="#">1949</a> | 130  | -   |   |                      | -   |   |                      | -  |   |                      | -   |   |                      |
| 1 | <a href="#">1950</a> | 72   | -   |   |                      | -   |   |                      | -  |   |                      | -   |   |                      |
| 1 | <a href="#">1951</a> | 236  | -   |   |                      | -   |   |                      | -  |   |                      | -   |   |                      |
| 1 | <a href="#">1952</a> | 393  | -   |   |                      | -   |   |                      | -  |   |                      | -   |   |                      |
| 1 | <a href="#">1953</a> | 344  | -   |   |                      | -   |   |                      | -  |   |                      | -   |   |                      |
| 1 | <a href="#">1954</a> | 103  | -   |   |                      | -   |   |                      | -  |   |                      | -   |   |                      |
| 1 | <a href="#">1955</a> | 60   | -   |   |                      | -   |   |                      | -  |   |                      | -   |   |                      |
| 1 | <a href="#">1956</a> | 110  | -   |   |                      | -   |   |                      | -  |   |                      | -   |   |                      |
| 1 | <a href="#">1957</a> | 194  | -   |   |                      | -   |   |                      | -  |   |                      | -   |   |                      |
| 1 | <a href="#">1958</a> | 177  | -   |   |                      | -   |   |                      | -  |   |                      | -   |   |                      |
| 1 | <a href="#">1959</a> | 427  | -   |   |                      | -   |   |                      | -  |   |                      | -   |   |                      |
| 1 | <a href="#">1960</a> | 520  | -   |   |                      | -   |   |                      | -  |   |                      | -   |   |                      |
| 1 | <a href="#">1961</a> | 140  | -   |   |                      | -   |   |                      | -  |   |                      | -   |   |                      |
| 1 | <a href="#">1962</a> | 401  | uni | 1 | <a href="#">1341</a> | bi  | 3 | <a href="#">3006</a> | -  |   |                      | uni | 1 | <a href="#">1835</a> |

|   |                      |      |     |   |                      |     |   |                      |     |   |                      |     |   |                      |
|---|----------------------|------|-----|---|----------------------|-----|---|----------------------|-----|---|----------------------|-----|---|----------------------|
| 1 | <a href="#">1963</a> | 142  | uni | 1 | <a href="#">1339</a> | uni | 1 | <a href="#">1684</a> | -   |   |                      | uni | 1 | <a href="#">1837</a> |
| 1 | <a href="#">1964</a> | 42   | -   |   |                      | -   |   |                      | -   |   |                      | -   |   |                      |
| 1 | <a href="#">1965</a> | 67   | bi  | 3 | <a href="#">2940</a> | -   |   |                      | -   |   |                      | -   |   |                      |
| 1 | <a href="#">1966</a> | 185  | uni | 4 | <a href="#">3018</a> | bi  | 1 | <a href="#">1686</a> | -   |   |                      | uni | 1 | <a href="#">1842</a> |
| 1 | <a href="#">1967</a> | 106  | -   |   |                      | -   |   |                      | -   |   |                      | -   |   |                      |
| 1 | <a href="#">1968</a> | 181  | -   |   |                      | bi  | 1 | <a href="#">2465</a> | -   |   |                      | -   |   |                      |
| 1 | <a href="#">1969</a> | 75   | -   |   |                      | bi  | 3 | <a href="#">2949</a> | -   |   |                      | -   |   |                      |
| 1 | <a href="#">1970</a> | 40   | -   |   |                      | bi  | 3 | <a href="#">2948</a> | -   |   |                      | -   |   |                      |
| 1 | <a href="#">1971</a> | 71   | -   |   |                      | bi  | 3 | <a href="#">2947</a> | -   |   |                      | -   |   |                      |
| 1 | <a href="#">1972</a> | 161  | -   |   |                      | -   |   |                      | -   |   |                      | bi  | 1 | <a href="#">1845</a> |
| 1 | <a href="#">1973</a> | 57   | -   |   |                      | -   |   |                      | -   |   |                      | -   |   |                      |
| 1 | <a href="#">1974</a> | 117  | -   |   |                      | -   |   |                      | -   |   |                      | -   |   |                      |
| 1 | <a href="#">1975</a> | 111  | -   |   |                      | -   |   |                      | -   |   |                      | bi  | 1 | <a href="#">1526</a> |
| 1 | <a href="#">1976</a> | 142  | uni | 1 | <a href="#">1333</a> | uni | 1 | <a href="#">1691</a> | -   |   |                      | -   |   |                      |
| 1 | <a href="#">1977</a> | 290  | uni | 1 | <a href="#">1668</a> | uni | 1 | <a href="#">2472</a> | uni | 1 | <a href="#">1018</a> | uni | 1 | <a href="#">2367</a> |
| 1 | <a href="#">1978</a> | 284  | uni | 1 | <a href="#">2331</a> | uni | 1 | <a href="#">1694</a> | -   |   |                      | -   |   |                      |
| 1 | <a href="#">1979</a> | 271  | -   |   |                      | uni | 1 | <a href="#">2474</a> | -   |   |                      | uni | 1 | <a href="#">2370</a> |
| 1 | <a href="#">1980</a> | 308  | -   |   |                      | uni | 1 | <a href="#">2475</a> | -   |   |                      | uni | 1 | <a href="#">2371</a> |
| 1 | <a href="#">1981</a> | 111  | -   |   |                      | -   |   |                      | -   |   |                      | -   |   |                      |
| 1 | <a href="#">1982</a> | 97   | -   |   |                      | -   |   |                      | -   |   |                      | -   |   |                      |
| 1 | <a href="#">1983</a> | 109  | -   |   |                      | -   |   |                      | -   |   |                      | uni | 1 | <a href="#">2374</a> |
| 1 | <a href="#">1984</a> | 70   | uni | 1 | <a href="#">1321</a> | bi  | 1 | <a href="#">254</a>  | -   |   |                      | -   |   |                      |
| 1 | <a href="#">1985</a> | 37   | -   |   |                      | bi  | 1 | <a href="#">2309</a> | -   |   |                      | -   |   |                      |
| 1 | <a href="#">1986</a> | 84   | -   |   |                      | -   |   |                      | -   |   |                      | -   |   |                      |
| 1 | <a href="#">1987</a> | 176  | -   |   |                      | -   |   |                      | -   |   |                      | -   |   |                      |
| 1 | <a href="#">1988</a> | 101  | -   |   |                      | -   |   |                      | -   |   |                      | -   |   |                      |
| 1 | <a href="#">1989</a> | 71   | -   |   |                      | -   |   |                      | -   |   |                      | -   |   |                      |
| 1 | <a href="#">1990</a> | 120  | uni | 1 | <a href="#">2343</a> | uni | 1 | <a href="#">1706</a> | -   |   |                      | -   |   |                      |
| 1 | <a href="#">1991</a> | 156  | uni | 1 | <a href="#">1664</a> | uni | 1 | <a href="#">1090</a> | uni | 1 | <a href="#">1014</a> | uni | 1 | <a href="#">1095</a> |
| 1 | <a href="#">1992</a> | 287  | -   |   |                      | -   |   |                      | -   |   |                      | -   |   |                      |
| 1 | <a href="#">1993</a> | 381  | uni | 1 | <a href="#">2347</a> | uni | 1 | <a href="#">1710</a> | uni | 1 | <a href="#">807</a>  | uni | 1 | <a href="#">2447</a> |
| 1 | <a href="#">1994</a> | 497  | bi  | 1 | <a href="#">2385</a> | bi  | 1 | <a href="#">1749</a> | bi  | 1 | <a href="#">1638</a> | bi  | 1 | <a href="#">1746</a> |
| 1 | <a href="#">1995</a> | 64   | bi  | 1 | <a href="#">2386</a> | bi  | 1 | <a href="#">1750</a> | bi  | 1 | <a href="#">1639</a> | bi  | 1 | <a href="#">1747</a> |
| 1 | <a href="#">1996</a> | 322  | bi  | 1 | <a href="#">2387</a> | bi  | 1 | <a href="#">1751</a> | bi  | 1 | <a href="#">1640</a> | bi  | 1 | <a href="#">1748</a> |
| 1 | <a href="#">1997</a> | 97   | bi  | 1 | <a href="#">2388</a> | bi  | 1 | <a href="#">1752</a> | bi  | 1 | <a href="#">1641</a> | bi  | 1 | <a href="#">1749</a> |
| 1 | <a href="#">1998</a> | 427  | bi  | 1 | <a href="#">2389</a> | bi  | 1 | <a href="#">1753</a> | bi  | 1 | <a href="#">1642</a> | bi  | 1 | <a href="#">1750</a> |
| 1 | <a href="#">1999</a> | 603  | bi  | 1 | <a href="#">2390</a> | bi  | 1 | <a href="#">1754</a> | bi  | 1 | <a href="#">1643</a> | bi  | 1 | <a href="#">1751</a> |
| 1 | <a href="#">2000</a> | 278  | bi  | 1 | <a href="#">2391</a> | bi  | 1 | <a href="#">1755</a> | bi  | 1 | <a href="#">1644</a> | bi  | 1 | <a href="#">1752</a> |
| 1 | <a href="#">2001</a> | 569  | bi  | 1 | <a href="#">2392</a> | bi  | 1 | <a href="#">1756</a> | bi  | 1 | <a href="#">1645</a> | bi  | 1 | <a href="#">1753</a> |
| 1 | <a href="#">2002</a> | 184  | bi  | 1 | <a href="#">2393</a> | bi  | 1 | <a href="#">1757</a> | bi  | 1 | <a href="#">1646</a> | bi  | 1 | <a href="#">1754</a> |
| 1 | <a href="#">3340</a> | 131  | bi  | 1 | <a href="#">2394</a> | bi  | 1 | <a href="#">1758</a> | bi  | 1 | <a href="#">1647</a> | bi  | 1 | <a href="#">1755</a> |
| 1 | <a href="#">2003</a> | 388  | bi  | 1 | <a href="#">2395</a> | bi  | 1 | <a href="#">1759</a> | bi  | 1 | <a href="#">1648</a> | bi  | 1 | <a href="#">1756</a> |
| 1 | <a href="#">2004</a> | 295  | bi  | 1 | <a href="#">2396</a> | bi  | 1 | <a href="#">1760</a> | bi  | 1 | <a href="#">1649</a> | bi  | 1 | <a href="#">1757</a> |
| 1 | <a href="#">2005</a> | 1230 | bi  | 1 | <a href="#">2397</a> | bi  | 1 | <a href="#">1761</a> | bi  | 1 | <a href="#">1650</a> | bi  | 1 | <a href="#">1758</a> |
| 1 | <a href="#">2006</a> | 447  | bi  | 1 | <a href="#">2399</a> | bi  | 1 | <a href="#">1762</a> | bi  | 1 | <a href="#">1652</a> | bi  | 1 | <a href="#">1760</a> |
| 1 | <a href="#">2007</a> | 128  | bi  | 1 | <a href="#">2400</a> | bi  | 1 | <a href="#">1763</a> | bi  | 1 | <a href="#">1653</a> | bi  | 1 | <a href="#">1761</a> |
| 1 | <a href="#">2008</a> | 414  | bi  | 1 | <a href="#">2401</a> | bi  | 1 | <a href="#">1764</a> | bi  | 1 | <a href="#">1654</a> | bi  | 1 | <a href="#">1762</a> |
| 1 | <a href="#">2009</a> | 310  | bi  | 1 | <a href="#">2402</a> | bi  | 1 | <a href="#">1765</a> | bi  | 1 | <a href="#">1655</a> | bi  | 1 | <a href="#">1763</a> |
| 1 | <a href="#">2010</a> | 249  | bi  | 1 | <a href="#">2403</a> | bi  | 1 | <a href="#">1766</a> | bi  | 1 | <a href="#">1656</a> | bi  | 1 | <a href="#">1764</a> |
| 1 | <a href="#">2011</a> | 604  | -   |   |                      | -   |   |                      | -   |   |                      | -   |   |                      |
| 1 | <a href="#">2012</a> | 325  | bi  | 1 | <a href="#">2405</a> | bi  | 1 | <a href="#">1767</a> | bi  | 1 | <a href="#">1658</a> | bi  | 1 | <a href="#">1766</a> |
| 1 | <a href="#">2013</a> | 474  | -   |   |                      | bi  | 1 | <a href="#">1768</a> | -   |   |                      | -   |   |                      |
| 1 | <a href="#">2014</a> | 324  | uni | 1 | <a href="#">2429</a> | uni | 1 | <a href="#">1794</a> | uni | 1 | <a href="#">1685</a> | uni | 1 | <a href="#">1790</a> |
| 1 | <a href="#">2015</a> | 275  | uni | 1 | <a href="#">2413</a> | bi  | 1 | <a href="#">1770</a> | -   |   |                      | uni | 1 | <a href="#">1774</a> |
| 1 | <a href="#">2016</a> | 468  | bi  | 1 | <a href="#">2406</a> | bi  | 1 | <a href="#">1771</a> | bi  | 1 | <a href="#">1661</a> | bi  | 1 | <a href="#">1767</a> |
| 1 | <a href="#">2017</a> | 325  | bi  | 1 | <a href="#">2409</a> | bi  | 1 | <a href="#">1773</a> | bi  | 1 | <a href="#">1665</a> | bi  | 1 | <a href="#">1770</a> |
| 1 | <a href="#">2018</a> | 353  | bi  | 1 | <a href="#">2410</a> | bi  | 1 | <a href="#">1774</a> | uni | 1 | <a href="#">1682</a> | bi  | 1 | <a href="#">1771</a> |

|   |                      |      |     |   |                      |     |   |                      |     |   |                      |     |   |                      |
|---|----------------------|------|-----|---|----------------------|-----|---|----------------------|-----|---|----------------------|-----|---|----------------------|
| 1 | <a href="#">2019</a> | 235  | bi  | 1 | <a href="#">2411</a> | bi  | 1 | <a href="#">1775</a> | -   |   |                      | bi  | 1 | <a href="#">1772</a> |
| 1 | <a href="#">2020</a> | 393  | uni | 1 | <a href="#">1025</a> | -   |   |                      | -   |   |                      | uni | 1 | <a href="#">424</a>  |
| 1 | <a href="#">2021</a> | 894  | bi  | 1 | <a href="#">2412</a> | bi  | 1 | <a href="#">1777</a> | bi  | 1 | <a href="#">1668</a> | bi  | 1 | <a href="#">1773</a> |
| 1 | <a href="#">2022</a> | 283  | bi  | 1 | <a href="#">2413</a> | bi  | 1 | <a href="#">1778</a> | bi  | 1 | <a href="#">1669</a> | bi  | 1 | <a href="#">1774</a> |
| 1 | <a href="#">2023</a> | 253  | bi  | 1 | <a href="#">2414</a> | uni | 1 | <a href="#">1783</a> | bi  | 1 | <a href="#">1670</a> | bi  | 1 | <a href="#">1775</a> |
| 1 | <a href="#">2024</a> | 466  | bi  | 1 | <a href="#">2415</a> | bi  | 1 | <a href="#">1780</a> | bi  | 1 | <a href="#">1671</a> | bi  | 1 | <a href="#">1776</a> |
| 1 | <a href="#">2025</a> | 434  | bi  | 1 | <a href="#">2416</a> | bi  | 1 | <a href="#">1781</a> | bi  | 1 | <a href="#">1672</a> | bi  | 1 | <a href="#">1777</a> |
| 1 | <a href="#">2026</a> | 657  | bi  | 1 | <a href="#">2417</a> | bi  | 1 | <a href="#">1782</a> | bi  | 1 | <a href="#">1673</a> | bi  | 1 | <a href="#">1778</a> |
| 1 | <a href="#">2027</a> | 714  | bi  | 1 | <a href="#">2418</a> | bi  | 1 | <a href="#">1783</a> | bi  | 1 | <a href="#">1674</a> | bi  | 1 | <a href="#">1779</a> |
| 1 | <a href="#">2028</a> | 1048 | bi  | 1 | <a href="#">2419</a> | bi  | 1 | <a href="#">1784</a> | bi  | 1 | <a href="#">1675</a> | bi  | 1 | <a href="#">1780</a> |
| 1 | <a href="#">2029</a> | 406  | bi  | 1 | <a href="#">2420</a> | bi  | 1 | <a href="#">1785</a> | bi  | 1 | <a href="#">1676</a> | bi  | 1 | <a href="#">1781</a> |
| 1 | <a href="#">2030</a> | 265  | bi  | 1 | <a href="#">2421</a> | bi  | 1 | <a href="#">1786</a> | bi  | 1 | <a href="#">1677</a> | bi  | 1 | <a href="#">1782</a> |
| 1 | <a href="#">2031</a> | 114  | bi  | 1 | <a href="#">2422</a> | bi  | 1 | <a href="#">1787</a> | bi  | 1 | <a href="#">1678</a> | bi  | 1 | <a href="#">1783</a> |
| 1 | <a href="#">2032</a> | 393  | uni | 1 | <a href="#">1025</a> | -   |   |                      | -   |   |                      | uni | 1 | <a href="#">424</a>  |
| 1 | <a href="#">2033</a> | 84   | -   |   |                      | -   |   |                      | -   |   |                      | -   |   |                      |
| 1 | <a href="#">2034</a> | 391  | uni | 1 | <a href="#">2146</a> | -   |   |                      | -   |   |                      | uni | 1 | <a href="#">1007</a> |
| 1 | <a href="#">2035</a> | 235  | -   |   |                      | -   |   |                      | -   |   |                      | -   |   |                      |
| 1 | <a href="#">2036</a> | 122  | bi  | 1 | <a href="#">2423</a> | bi  | 1 | <a href="#">1788</a> | bi  | 1 | <a href="#">1679</a> | bi  | 1 | <a href="#">1784</a> |
| 1 | <a href="#">2037</a> | 242  | bi  | 1 | <a href="#">2424</a> | bi  | 1 | <a href="#">1789</a> | bi  | 1 | <a href="#">1680</a> | bi  | 1 | <a href="#">1785</a> |
| 1 | <a href="#">2038</a> | 300  | bi  | 1 | <a href="#">2425</a> | bi  | 1 | <a href="#">1790</a> | bi  | 1 | <a href="#">1681</a> | bi  | 1 | <a href="#">1786</a> |
| 1 | <a href="#">2039</a> | 343  | bi  | 1 | <a href="#">2426</a> | bi  | 1 | <a href="#">1791</a> | bi  | 1 | <a href="#">1682</a> | bi  | 1 | <a href="#">1787</a> |
| 1 | <a href="#">2040</a> | 191  | bi  | 1 | <a href="#">2427</a> | bi  | 1 | <a href="#">1792</a> | bi  | 1 | <a href="#">1683</a> | bi  | 1 | <a href="#">1788</a> |
| 1 | <a href="#">2041</a> | 289  | bi  | 1 | <a href="#">2428</a> | bi  | 1 | <a href="#">1793</a> | bi  | 1 | <a href="#">1684</a> | bi  | 1 | <a href="#">1789</a> |
| 1 | <a href="#">2042</a> | 238  | bi  | 1 | <a href="#">2429</a> | bi  | 1 | <a href="#">1794</a> | bi  | 1 | <a href="#">1685</a> | bi  | 1 | <a href="#">1790</a> |
| 1 | <a href="#">2043</a> | 276  | bi  | 1 | <a href="#">2430</a> | bi  | 1 | <a href="#">1795</a> | bi  | 1 | <a href="#">1686</a> | bi  | 1 | <a href="#">1791</a> |
| 1 | <a href="#">2044</a> | 263  | bi  | 1 | <a href="#">2431</a> | bi  | 1 | <a href="#">1796</a> | bi  | 1 | <a href="#">1687</a> | bi  | 1 | <a href="#">1792</a> |
| 1 | <a href="#">2045</a> | 379  | bi  | 1 | <a href="#">2432</a> | bi  | 1 | <a href="#">1797</a> | bi  | 1 | <a href="#">1688</a> | bi  | 1 | <a href="#">1793</a> |
| 1 | <a href="#">2046</a> | 303  | bi  | 1 | <a href="#">2433</a> | bi  | 1 | <a href="#">1798</a> | bi  | 1 | <a href="#">1689</a> | bi  | 1 | <a href="#">1794</a> |
| 1 | <a href="#">2047</a> | 255  | bi  | 1 | <a href="#">2434</a> | bi  | 1 | <a href="#">1799</a> | bi  | 1 | <a href="#">1690</a> | bi  | 1 | <a href="#">1795</a> |
| 1 | <a href="#">2048</a> | 148  | bi  | 1 | <a href="#">2435</a> | bi  | 1 | <a href="#">1800</a> | bi  | 1 | <a href="#">1691</a> | bi  | 1 | <a href="#">1796</a> |
| 1 | <a href="#">2049</a> | 158  | bi  | 1 | <a href="#">2436</a> | bi  | 1 | <a href="#">1801</a> | bi  | 1 | <a href="#">1692</a> | bi  | 1 | <a href="#">1797</a> |
| 1 | <a href="#">2050</a> | 191  | bi  | 1 | <a href="#">2437</a> | bi  | 1 | <a href="#">1802</a> | bi  | 1 | <a href="#">1693</a> | bi  | 1 | <a href="#">1798</a> |
| 1 | <a href="#">3341</a> | 111  | uni | 1 | <a href="#">2438</a> | uni | 1 | <a href="#">1803</a> | uni | 1 | <a href="#">1694</a> | uni | 1 | <a href="#">1799</a> |
| 1 | <a href="#">3342</a> | 311  | bi  | 1 | <a href="#">2438</a> | bi  | 1 | <a href="#">1803</a> | bi  | 1 | <a href="#">1694</a> | bi  | 1 | <a href="#">1799</a> |
| 1 | <a href="#">2051</a> | 127  | -   |   |                      | -   |   |                      | bi  | 1 | <a href="#">1695</a> | bi  | 1 | <a href="#">1800</a> |
| 1 | <a href="#">2052</a> | 174  | bi  | 1 | <a href="#">2439</a> | bi  | 1 | <a href="#">1804</a> | bi  | 1 | <a href="#">1696</a> | bi  | 1 | <a href="#">1865</a> |
| 1 | <a href="#">2053</a> | 284  | bi  | 1 | <a href="#">2440</a> | bi  | 1 | <a href="#">1805</a> | bi  | 1 | <a href="#">1697</a> | bi  | 1 | <a href="#">1866</a> |
| 1 | <a href="#">2054</a> | 282  | bi  | 1 | <a href="#">2441</a> | bi  | 1 | <a href="#">1806</a> | bi  | 1 | <a href="#">1698</a> | bi  | 1 | <a href="#">1867</a> |
| 1 | <a href="#">2055</a> | 113  | bi  | 1 | <a href="#">2442</a> | bi  | 1 | <a href="#">1807</a> | bi  | 1 | <a href="#">1699</a> | bi  | 1 | <a href="#">1868</a> |
| 1 | <a href="#">2056</a> | 235  | bi  | 1 | <a href="#">2443</a> | bi  | 1 | <a href="#">1808</a> | bi  | 1 | <a href="#">1700</a> | bi  | 1 | <a href="#">1869</a> |
| 1 | <a href="#">2057</a> | 118  | bi  | 1 | <a href="#">2444</a> | bi  | 1 | <a href="#">1809</a> | bi  | 1 | <a href="#">1701</a> | bi  | 1 | <a href="#">1870</a> |
| 1 | <a href="#">2058</a> | 335  | bi  | 1 | <a href="#">2445</a> | bi  | 1 | <a href="#">1810</a> | bi  | 1 | <a href="#">1702</a> | bi  | 1 | <a href="#">1871</a> |
| 1 | <a href="#">2059</a> | 489  | bi  | 1 | <a href="#">2446</a> | bi  | 1 | <a href="#">1811</a> | bi  | 1 | <a href="#">1703</a> | bi  | 1 | <a href="#">1872</a> |
| 1 | <a href="#">2060</a> | 127  | bi  | 1 | <a href="#">2447</a> | bi  | 1 | <a href="#">1812</a> | bi  | 1 | <a href="#">1704</a> | bi  | 1 | <a href="#">1873</a> |
| 1 | <a href="#">2061</a> | 161  | bi  | 1 | <a href="#">2448</a> | bi  | 1 | <a href="#">1813</a> | bi  | 1 | <a href="#">1705</a> | bi  | 1 | <a href="#">1874</a> |
| 1 | <a href="#">2062</a> | 371  | bi  | 1 | <a href="#">2449</a> | bi  | 1 | <a href="#">1814</a> | bi  | 1 | <a href="#">1706</a> | bi  | 1 | <a href="#">1875</a> |
| 1 | <a href="#">2063</a> | 714  | bi  | 1 | <a href="#">2450</a> | bi  | 1 | <a href="#">1815</a> | bi  | 1 | <a href="#">1707</a> | bi  | 1 | <a href="#">1876</a> |
| 1 | <a href="#">2064</a> | 494  | bi  | 1 | <a href="#">2451</a> | bi  | 1 | <a href="#">1816</a> | bi  | 1 | <a href="#">1708</a> | bi  | 1 | <a href="#">1877</a> |
| 1 | <a href="#">2065</a> | 571  | bi  | 1 | <a href="#">2452</a> | bi  | 1 | <a href="#">1817</a> | bi  | 1 | <a href="#">1709</a> | bi  | 1 | <a href="#">1878</a> |
| 1 | <a href="#">2066</a> | 212  | bi  | 1 | <a href="#">2453</a> | bi  | 1 | <a href="#">1818</a> | bi  | 1 | <a href="#">1710</a> | bi  | 1 | <a href="#">1879</a> |
| 1 | <a href="#">2067</a> | 489  | bi  | 1 | <a href="#">2454</a> | bi  | 1 | <a href="#">1819</a> | bi  | 1 | <a href="#">1711</a> | bi  | 1 | <a href="#">1880</a> |
| 1 | <a href="#">2068</a> | 308  | bi  | 1 | <a href="#">2455</a> | bi  | 1 | <a href="#">1820</a> | bi  | 1 | <a href="#">1712</a> | bi  | 1 | <a href="#">1881</a> |
| 1 | <a href="#">2069</a> | 313  | bi  | 1 | <a href="#">2456</a> | bi  | 1 | <a href="#">1821</a> | bi  | 1 | <a href="#">1713</a> | bi  | 1 | <a href="#">1882</a> |
| 1 | <a href="#">2070</a> | 1500 | bi  | 1 | <a href="#">2458</a> | bi  | 1 | <a href="#">1823</a> | bi  | 1 | <a href="#">1714</a> | bi  | 1 | <a href="#">1884</a> |
| 1 | <a href="#">2071</a> | 256  | bi  | 1 | <a href="#">2459</a> | bi  | 1 | <a href="#">1824</a> | bi  | 1 | <a href="#">1715</a> | bi  | 1 | <a href="#">1885</a> |
| 1 | <a href="#">2072</a> | 576  | bi  | 1 | <a href="#">2460</a> | bi  | 1 | <a href="#">1825</a> | bi  | 1 | <a href="#">1716</a> | bi  | 1 | <a href="#">1886</a> |
| 1 | <a href="#">2073</a> | 593  | bi  | 1 | <a href="#">2461</a> | bi  | 1 | <a href="#">1826</a> | bi  | 1 | <a href="#">1717</a> | bi  | 1 | <a href="#">1887</a> |

|   |                      |      |     |   |                      |     |   |                      |     |   |                      |     |   |                      |
|---|----------------------|------|-----|---|----------------------|-----|---|----------------------|-----|---|----------------------|-----|---|----------------------|
| 1 | <a href="#">2074</a> | 335  | bi  | 1 | <a href="#">2462</a> | bi  | 1 | <a href="#">1827</a> | bi  | 1 | <a href="#">1718</a> | bi  | 1 | <a href="#">1888</a> |
| 1 | <a href="#">2075</a> | 1260 | bi  | 1 | <a href="#">2464</a> | bi  | 1 | <a href="#">1828</a> | bi  | 1 | <a href="#">1719</a> | -   |   |                      |
| 1 | <a href="#">2076</a> | 323  | bi  | 1 | <a href="#">2465</a> | bi  | 1 | <a href="#">1829</a> | bi  | 1 | <a href="#">1720</a> | -   |   |                      |
| 1 | <a href="#">2077</a> | 224  | bi  | 1 | <a href="#">2466</a> | bi  | 1 | <a href="#">1830</a> | bi  | 1 | <a href="#">1721</a> | -   |   |                      |
| 1 | <a href="#">2078</a> | 293  | bi  | 1 | <a href="#">2467</a> | bi  | 1 | <a href="#">1831</a> | bi  | 1 | <a href="#">1722</a> | uni | 1 | <a href="#">1163</a> |
| 1 | <a href="#">2079</a> | 301  | bi  | 1 | <a href="#">2468</a> | bi  | 1 | <a href="#">1832</a> | bi  | 1 | <a href="#">1723</a> | uni | 1 | <a href="#">2312</a> |
| 1 | <a href="#">2080</a> | 426  | bi  | 1 | <a href="#">2469</a> | bi  | 1 | <a href="#">1833</a> | bi  | 1 | <a href="#">1724</a> | uni | 1 | <a href="#">1165</a> |
| 1 | <a href="#">2081</a> | 381  | bi  | 1 | <a href="#">2470</a> | bi  | 1 | <a href="#">1834</a> | bi  | 1 | <a href="#">1725</a> | -   |   |                      |
| 1 | <a href="#">2082</a> | 600  | bi  | 1 | <a href="#">2471</a> | bi  | 1 | <a href="#">1835</a> | bi  | 1 | <a href="#">1726</a> | -   |   |                      |
| 1 | <a href="#">2083</a> | 129  | bi  | 1 | <a href="#">2472</a> | bi  | 1 | <a href="#">1836</a> | bi  | 1 | <a href="#">1727</a> | -   |   |                      |
| 1 | <a href="#">2084</a> | 354  | bi  | 1 | <a href="#">2473</a> | bi  | 1 | <a href="#">1837</a> | bi  | 1 | <a href="#">1728</a> | uni | 1 | <a href="#">898</a>  |
| 1 | <a href="#">2085</a> | 278  | bi  | 1 | <a href="#">2474</a> | bi  | 1 | <a href="#">1838</a> | bi  | 1 | <a href="#">1729</a> | -   |   |                      |
| 1 | <a href="#">2086</a> | 383  | uni | 1 | <a href="#">530</a>  | bi  | 1 | <a href="#">1841</a> | -   |   |                      | bi  | 1 | <a href="#">1522</a> |
| 1 | <a href="#">2087</a> | 62   | uni | 1 | <a href="#">529</a>  | -   |   |                      | -   |   |                      | -   |   |                      |
| 1 | <a href="#">2088</a> | 73   | -   |   |                      | -   |   |                      | -   |   |                      | -   |   |                      |
| 1 | <a href="#">2089</a> | 136  | -   |   |                      | -   |   |                      | -   |   |                      | -   |   |                      |
| 1 | <a href="#">2090</a> | 137  | -   |   |                      | -   |   |                      | -   |   |                      | -   |   |                      |
| 1 | <a href="#">2091</a> | 245  | uni | 1 | <a href="#">2895</a> | uni | 1 | <a href="#">2493</a> | uni | 1 | <a href="#">2111</a> | uni | 1 | <a href="#">2268</a> |
| 1 | <a href="#">2092</a> | 1005 | bi  | 1 | <a href="#">2487</a> | bi  | 1 | <a href="#">1925</a> | uni | 1 | <a href="#">2443</a> | uni | 1 | <a href="#">2406</a> |
| 1 | <a href="#">2093</a> | 73   | -   |   |                      | -   |   |                      | -   |   |                      | -   |   |                      |
| 1 | <a href="#">2094</a> | 648  | uni | 1 | <a href="#">2487</a> | uni | 1 | <a href="#">2835</a> | uni | 1 | <a href="#">2443</a> | uni | 1 | <a href="#">2661</a> |
| 1 | <a href="#">2095</a> | 56   | -   |   |                      | -   |   |                      | -   |   |                      | -   |   |                      |
| 1 | <a href="#">2096</a> | 110  | -   |   |                      | -   |   |                      | -   |   |                      | -   |   |                      |
| 1 | <a href="#">2097</a> | 350  | bi  | 1 | <a href="#">2488</a> | uni | 1 | <a href="#">2581</a> | uni | 1 | <a href="#">2199</a> | uni | 1 | <a href="#">2405</a> |
| 1 | <a href="#">2098</a> | 223  | uni | 1 | <a href="#">307</a>  | uni | 1 | <a href="#">2835</a> | uni | 1 | <a href="#">2443</a> | uni | 1 | <a href="#">2610</a> |
| 1 | <a href="#">2099</a> | 370  | uni | 1 | <a href="#">1971</a> | uni | 1 | <a href="#">1841</a> | uni | 1 | <a href="#">1321</a> | uni | 1 | <a href="#">1404</a> |
| 1 | <a href="#">2100</a> | 434  | uni | 1 | <a href="#">1855</a> | uni | 1 | <a href="#">1288</a> | uni | 1 | <a href="#">1213</a> | uni | 1 | <a href="#">1286</a> |
| 1 | <a href="#">2101</a> | 206  | uni | 1 | <a href="#">2284</a> | uni | 1 | <a href="#">1644</a> | uni | 1 | <a href="#">1593</a> | uni | 1 | <a href="#">1701</a> |
| 1 | <a href="#">2102</a> | 231  | uni | 1 | <a href="#">2818</a> | uni | 1 | <a href="#">2363</a> | uni | 1 | <a href="#">2037</a> | uni | 1 | <a href="#">2191</a> |
| 1 | <a href="#">2103</a> | 186  | -   |   |                      | -   |   |                      | -   |   |                      | -   |   |                      |
| 1 | <a href="#">2104</a> | 52   | -   |   |                      | -   |   |                      | -   |   |                      | -   |   |                      |
| 1 | <a href="#">2105</a> | 265  | uni | 1 | <a href="#">2474</a> | uni | 1 | <a href="#">1838</a> | uni | 1 | <a href="#">1729</a> | -   |   |                      |
| 1 | <a href="#">2106</a> | 268  | uni | 1 | <a href="#">733</a>  | uni | 1 | <a href="#">362</a>  | uni | 1 | <a href="#">307</a>  | uni | 1 | <a href="#">307</a>  |
| 1 | <a href="#">2107</a> | 277  | uni | 1 | <a href="#">732</a>  | uni | 1 | <a href="#">361</a>  | uni | 1 | <a href="#">306</a>  | uni | 1 | <a href="#">306</a>  |
| 1 | <a href="#">2108</a> | 334  | uni | 1 | <a href="#">731</a>  | uni | 1 | <a href="#">360</a>  | uni | 1 | <a href="#">305</a>  | uni | 1 | <a href="#">305</a>  |
| 1 | <a href="#">2109</a> | 216  | uni | 1 | <a href="#">730</a>  | uni | 1 | <a href="#">359</a>  | uni | 1 | <a href="#">304</a>  | uni | 1 | <a href="#">304</a>  |
| 1 | <a href="#">2110</a> | 139  | uni | 1 | <a href="#">965</a>  | uni | 1 | <a href="#">451</a>  | uni | 1 | <a href="#">2265</a> | uni | 1 | <a href="#">2481</a> |
| 1 | <a href="#">2111</a> | 643  | uni | 1 | <a href="#">963</a>  | -   |   |                      | -   |   |                      | -   |   |                      |
| 1 | <a href="#">2112</a> | 272  | bi  | 1 | <a href="#">961</a>  | uni | 1 | <a href="#">2653</a> | uni | 1 | <a href="#">2260</a> | uni | 1 | <a href="#">2477</a> |
| 1 | <a href="#">2113</a> | 272  | uni | 1 | <a href="#">2261</a> | uni | 1 | <a href="#">1621</a> | uni | 1 | <a href="#">1568</a> | uni | 1 | <a href="#">2478</a> |
| 1 | <a href="#">2114</a> | 167  | uni | 1 | <a href="#">122</a>  | uni | 1 | <a href="#">2656</a> | uni | 1 | <a href="#">2264</a> | uni | 1 | <a href="#">2480</a> |
| 1 | <a href="#">2115</a> | 396  | uni | 1 | <a href="#">2470</a> | uni | 1 | <a href="#">630</a>  | uni | 1 | <a href="#">529</a>  | -   |   |                      |
| 1 | <a href="#">2116</a> | 246  | uni | 1 | <a href="#">2583</a> | uni | 1 | <a href="#">2647</a> | uni | 1 | <a href="#">1805</a> | uni | 1 | <a href="#">1951</a> |
| 1 | <a href="#">2117</a> | 74   | uni | 1 | <a href="#">2449</a> | uni | 1 | <a href="#">1814</a> | uni | 1 | <a href="#">1706</a> | uni | 1 | <a href="#">1875</a> |
| 1 | <a href="#">2118</a> | 584  | uni | 1 | <a href="#">2449</a> | uni | 1 | <a href="#">1814</a> | uni | 1 | <a href="#">1706</a> | uni | 1 | <a href="#">1875</a> |
| 1 | <a href="#">2119</a> | 303  | uni | 1 | <a href="#">2185</a> | -   |   |                      | uni | 1 | <a href="#">783</a>  | -   |   |                      |
| 1 | <a href="#">2120</a> | 341  | uni | 1 | <a href="#">2186</a> | uni | 1 | <a href="#">1962</a> | bi  | 1 | <a href="#">782</a>  | uni | 1 | <a href="#">1276</a> |
| 1 | <a href="#">2121</a> | 705  | uni | 1 | <a href="#">2187</a> | -   |   |                      | bi  | 1 | <a href="#">781</a>  | -   |   |                      |
| 1 | <a href="#">2122</a> | 816  | uni | 1 | <a href="#">2188</a> | -   |   |                      | uni | 1 | <a href="#">780</a>  | -   |   |                      |
| 1 | <a href="#">2123</a> | 130  | uni | 1 | <a href="#">2189</a> | -   |   |                      | uni | 1 | <a href="#">778</a>  | -   |   |                      |
| 1 | <a href="#">2124</a> | 205  | -   |   |                      | -   |   |                      | -   |   |                      | -   |   |                      |
| 1 | <a href="#">2125</a> | 538  | -   |   |                      | bi  | 1 | <a href="#">2860</a> | -   |   |                      | bi  | 1 | <a href="#">2381</a> |
| 1 | <a href="#">2126</a> | 59   | -   |   |                      | -   |   |                      | -   |   |                      | -   |   |                      |
| 1 | <a href="#">2127</a> | 287  | -   |   |                      | -   |   |                      | -   |   |                      | -   |   |                      |
| 1 | <a href="#">2128</a> | 404  | -   |   |                      | -   |   |                      | -   |   |                      | -   |   |                      |
| 1 | <a href="#">2129</a> | 187  | -   |   |                      | -   |   |                      | -   |   |                      | -   |   |                      |
| 1 | <a href="#">2130</a> | 40   | -   |   |                      | -   |   |                      | -   |   |                      | -   |   |                      |

|   |                      |      |     |   |                      |     |   |                      |     |   |                      |     |   |                      |
|---|----------------------|------|-----|---|----------------------|-----|---|----------------------|-----|---|----------------------|-----|---|----------------------|
| 1 | <a href="#">2131</a> | 149  | -   |   |                      | -   |   |                      | -   |   |                      | -   |   |                      |
| 1 | <a href="#">2132</a> | 127  | -   |   |                      | -   |   |                      | uni | 1 | <a href="#">793</a>  | -   |   |                      |
| 1 | <a href="#">2133</a> | 122  | uni | 1 | <a href="#">2752</a> | uni | 1 | <a href="#">2231</a> | uni | 1 | <a href="#">1972</a> | uni | 1 | <a href="#">2124</a> |
| 1 | <a href="#">2134</a> | 115  | -   |   |                      | -   |   |                      | -   |   |                      | -   |   |                      |
| 1 | <a href="#">2135</a> | 203  | -   |   |                      | -   |   |                      | -   |   |                      | -   |   |                      |
| 1 | <a href="#">2136</a> | 343  | uni | 1 | <a href="#">1181</a> | uni | 1 | <a href="#">665</a>  | uni | 1 | <a href="#">558</a>  | uni | 1 | <a href="#">671</a>  |
| 1 | <a href="#">2137</a> | 324  | uni | 1 | <a href="#">210</a>  | uni | 1 | <a href="#">2746</a> | uni | 1 | <a href="#">2351</a> | uni | 1 | <a href="#">2569</a> |
| 1 | <a href="#">2138</a> | 276  | -   |   |                      | -   |   |                      | -   |   |                      | -   |   |                      |
| 1 | <a href="#">2139</a> | 269  | bi  | 1 | <a href="#">2893</a> | bi  | 1 | <a href="#">2491</a> | bi  | 1 | <a href="#">2109</a> | bi  | 1 | <a href="#">2266</a> |
| 1 | <a href="#">2140</a> | 448  | uni | 1 | <a href="#">2025</a> | uni | 1 | <a href="#">1450</a> | uni | 1 | <a href="#">1375</a> | uni | 1 | <a href="#">1459</a> |
| 1 | <a href="#">2141</a> | 221  | uni | 1 | <a href="#">1583</a> | uni | 1 | <a href="#">1010</a> | uni | 1 | <a href="#">936</a>  | uni | 1 | <a href="#">1018</a> |
| 1 | <a href="#">2142</a> | 63   | -   |   |                      | bi  | 1 | <a href="#">2853</a> | -   |   |                      | -   |   |                      |
| 1 | <a href="#">2143</a> | 73   | -   |   |                      | -   |   |                      | -   |   |                      | -   |   |                      |
| 1 | <a href="#">2144</a> | 471  | uni | 3 | <a href="#">2961</a> | -   |   |                      | -   |   |                      | uni | 1 | <a href="#">375</a>  |
| 1 | <a href="#">2145</a> | 92   | -   |   |                      | -   |   |                      | -   |   |                      | -   |   |                      |
| 1 | <a href="#">2146</a> | 317  | -   |   |                      | -   |   |                      | -   |   |                      | -   |   |                      |
| 1 | <a href="#">2147</a> | 113  | uni | 3 | <a href="#">2960</a> | -   |   |                      | -   |   |                      | uni | 1 | <a href="#">376</a>  |
| 1 | <a href="#">2148</a> | 3174 | -   |   |                      | bi  | 1 | <a href="#">1951</a> | -   |   |                      | -   |   |                      |
| 1 | <a href="#">2149</a> | 34   | -   |   |                      | -   |   |                      | -   |   |                      | -   |   |                      |
| 1 | <a href="#">2150</a> | 73   | -   |   |                      | -   |   |                      | -   |   |                      | -   |   |                      |
| 1 | <a href="#">2151</a> | 150  | -   |   |                      | -   |   |                      | -   |   |                      | -   |   |                      |
| 1 | <a href="#">2152</a> | 54   | -   |   |                      | -   |   |                      | -   |   |                      | -   |   |                      |
| 1 | <a href="#">2153</a> | 706  | uni | 1 | <a href="#">2366</a> | uni | 1 | <a href="#">1731</a> | uni | 1 | <a href="#">1620</a> | uni | 1 | <a href="#">1727</a> |
| 1 | <a href="#">2154</a> | 76   | -   |   |                      | -   |   |                      | -   |   |                      | -   |   |                      |
| 1 | <a href="#">2155</a> | 429  | -   |   |                      | -   |   |                      | -   |   |                      | -   |   |                      |
| 1 | <a href="#">2156</a> | 83   | -   |   |                      | -   |   |                      | -   |   |                      | -   |   |                      |
| 1 | <a href="#">2157</a> | 283  | -   |   |                      | -   |   |                      | -   |   |                      | -   |   |                      |
| 1 | <a href="#">2158</a> | 34   | -   |   |                      | -   |   |                      | -   |   |                      | -   |   |                      |
| 1 | <a href="#">2159</a> | 926  | uni | 1 | <a href="#">522</a>  | uni | 1 | <a href="#">2443</a> | uni | 1 | <a href="#">782</a>  | bi  | 1 | <a href="#">1804</a> |
| 1 | <a href="#">2160</a> | 372  | -   |   |                      | -   |   |                      | -   |   |                      | -   |   |                      |
| 1 | <a href="#">2161</a> | 826  | uni | 3 | <a href="#">2951</a> | -   |   |                      | -   |   |                      | uni | 1 | <a href="#">387</a>  |
| 1 | <a href="#">2162</a> | 140  | -   |   |                      | -   |   |                      | -   |   |                      | -   |   |                      |
| 1 | <a href="#">2163</a> | 435  | -   |   |                      | -   |   |                      | -   |   |                      | -   |   |                      |
| 1 | <a href="#">3343</a> | 185  | -   |   |                      | -   |   |                      | -   |   |                      | -   |   |                      |
| 1 | <a href="#">2164</a> | 290  | -   |   |                      | -   |   |                      | -   |   |                      | -   |   |                      |
| 1 | <a href="#">2165</a> | 64   | -   |   |                      | -   |   |                      | -   |   |                      | -   |   |                      |
| 1 | <a href="#">2166</a> | 629  | uni | 1 | <a href="#">2204</a> | -   |   |                      | -   |   |                      | -   |   |                      |
| 1 | <a href="#">2167</a> | 44   | -   |   |                      | -   |   |                      | -   |   |                      | -   |   |                      |
| 1 | <a href="#">2168</a> | 592  | uni | 3 | <a href="#">2957</a> | bi  | 3 | <a href="#">2983</a> | -   |   |                      | uni | 1 | <a href="#">381</a>  |
| 1 | <a href="#">2169</a> | 160  | -   |   |                      | -   |   |                      | -   |   |                      | -   |   |                      |
| 1 | <a href="#">2170</a> | 169  | -   |   |                      | -   |   |                      | -   |   |                      | -   |   |                      |
| 1 | <a href="#">2171</a> | 144  | -   |   |                      | -   |   |                      | -   |   |                      | -   |   |                      |
| 1 | <a href="#">2172</a> | 286  | -   |   |                      | -   |   |                      | -   |   |                      | -   |   |                      |
| 1 | <a href="#">2173</a> | 153  | -   |   |                      | -   |   |                      | -   |   |                      | -   |   |                      |
| 1 | <a href="#">2174</a> | 329  | uni | 3 | <a href="#">2933</a> | uni | 1 | <a href="#">1997</a> | -   |   |                      | -   |   |                      |
| 1 | <a href="#">2175</a> | 167  | uni | 1 | <a href="#">2192</a> | -   |   |                      | uni | 1 | <a href="#">774</a>  | -   |   |                      |
| 1 | <a href="#">2176</a> | 74   | uni | 1 | <a href="#">2193</a> | -   |   |                      | uni | 1 | <a href="#">773</a>  | -   |   |                      |
| 1 | <a href="#">2177</a> | 46   | uni | 1 | <a href="#">2196</a> | -   |   |                      | -   |   |                      | -   |   |                      |
| 1 | <a href="#">2178</a> | 395  | uni | 1 | <a href="#">2197</a> | -   |   |                      | uni | 1 | <a href="#">772</a>  | -   |   |                      |
| 1 | <a href="#">2179</a> | 85   | -   |   |                      | -   |   |                      | bi  | 1 | <a href="#">771</a>  | -   |   |                      |
| 1 | <a href="#">2180</a> | 332  | -   |   |                      | bi  | 3 | <a href="#">3005</a> | bi  | 1 | <a href="#">770</a>  | bi  | 1 | <a href="#">2643</a> |
| 1 | <a href="#">2181</a> | 274  | -   |   |                      | -   |   |                      | -   |   |                      | -   |   |                      |
| 1 | <a href="#">2182</a> | 153  | -   |   |                      | -   |   |                      | -   |   |                      | -   |   |                      |
| 1 | <a href="#">2183</a> | 449  | uni | 1 | <a href="#">2202</a> | uni | 1 | <a href="#">1720</a> | uni | 1 | <a href="#">769</a>  | uni | 1 | <a href="#">1718</a> |
| 1 | <a href="#">2184</a> | 118  | uni | 1 | <a href="#">2206</a> | -   |   |                      | -   |   |                      | -   |   |                      |
| 1 | <a href="#">2185</a> | 124  | uni | 1 | <a href="#">2207</a> | -   |   |                      | uni | 1 | <a href="#">768</a>  | -   |   |                      |
| 1 | <a href="#">2186</a> | 105  | uni | 1 | <a href="#">2208</a> | -   |   |                      | bi  | 1 | <a href="#">767</a>  | -   |   |                      |



|   |                      |      |     |   |                      |     |   |                      |     |   |                      |     |   |                      |
|---|----------------------|------|-----|---|----------------------|-----|---|----------------------|-----|---|----------------------|-----|---|----------------------|
| 1 | <a href="#">2187</a> | 1075 | uni | 1 | <a href="#">2209</a> | uni | 1 | <a href="#">2104</a> | uni | 1 | <a href="#">765</a>  | uni | 1 | <a href="#">1623</a> |
| 1 | <a href="#">2188</a> | 611  | -   |   |                      | bi  | 1 | <a href="#">2923</a> | -   |   |                      | -   |   |                      |
| 1 | <a href="#">2189</a> | 460  | -   |   |                      | -   |   |                      | -   |   |                      | -   |   |                      |
| 1 | <a href="#">2190</a> | 310  | bi  | 1 | <a href="#">2481</a> | bi  | 1 | <a href="#">1999</a> | -   |   |                      | -   |   |                      |
| 1 | <a href="#">2191</a> | 69   | -   |   |                      | -   |   |                      | -   |   |                      | -   |   |                      |
| 1 | <a href="#">2192</a> | 612  | bi  | 1 | <a href="#">2482</a> | bi  | 1 | <a href="#">2000</a> | bi  | 1 | <a href="#">1740</a> | bi  | 1 | <a href="#">1889</a> |
| 1 | <a href="#">2193</a> | 407  | bi  | 1 | <a href="#">2483</a> | bi  | 1 | <a href="#">2001</a> | bi  | 1 | <a href="#">1741</a> | bi  | 1 | <a href="#">1890</a> |
| 1 | <a href="#">2194</a> | 160  | bi  | 1 | <a href="#">2484</a> | bi  | 1 | <a href="#">2002</a> | bi  | 1 | <a href="#">1742</a> | bi  | 1 | <a href="#">1891</a> |
| 1 | <a href="#">2195</a> | 869  | bi  | 1 | <a href="#">2485</a> | bi  | 1 | <a href="#">2003</a> | bi  | 1 | <a href="#">1743</a> | bi  | 1 | <a href="#">1892</a> |
| 1 | <a href="#">2196</a> | 124  | bi  | 1 | <a href="#">2486</a> | bi  | 1 | <a href="#">2004</a> | bi  | 1 | <a href="#">1744</a> | bi  | 1 | <a href="#">1893</a> |
| 1 | <a href="#">3344</a> | 186  | bi  | 1 | <a href="#">1643</a> | bi  | 1 | <a href="#">1069</a> | -   |   |                      | bi  | 1 | <a href="#">414</a>  |
| 1 | <a href="#">3345</a> | 231  | uni | 1 | <a href="#">1644</a> | uni | 1 | <a href="#">2322</a> | -   |   |                      | bi  | 1 | <a href="#">413</a>  |
| 1 | <a href="#">2197</a> | 38   | bi  | 1 | <a href="#">1644</a> | bi  | 1 | <a href="#">1070</a> | -   |   |                      | -   |   |                      |
| 1 | <a href="#">2198</a> | 432  | bi  | 1 | <a href="#">2489</a> | bi  | 1 | <a href="#">2005</a> | bi  | 1 | <a href="#">1745</a> | bi  | 1 | <a href="#">1894</a> |
| 1 | <a href="#">2199</a> | 372  | bi  | 1 | <a href="#">2490</a> | bi  | 1 | <a href="#">2006</a> | bi  | 1 | <a href="#">1746</a> | bi  | 1 | <a href="#">1895</a> |
| 1 | <a href="#">2200</a> | 35   | -   |   |                      | -   |   |                      | -   |   |                      | -   |   |                      |
| 1 | <a href="#">2201</a> | 435  | bi  | 1 | <a href="#">2491</a> | bi  | 1 | <a href="#">2007</a> | bi  | 1 | <a href="#">1747</a> | bi  | 1 | <a href="#">1896</a> |
| 1 | <a href="#">2202</a> | 194  | bi  | 1 | <a href="#">2492</a> | bi  | 1 | <a href="#">2008</a> | bi  | 1 | <a href="#">1748</a> | bi  | 1 | <a href="#">1897</a> |
| 1 | <a href="#">2203</a> | 229  | bi  | 1 | <a href="#">2493</a> | bi  | 1 | <a href="#">2009</a> | bi  | 1 | <a href="#">1749</a> | bi  | 1 | <a href="#">1898</a> |
| 1 | <a href="#">2204</a> | 214  | bi  | 1 | <a href="#">2494</a> | bi  | 1 | <a href="#">2010</a> | bi  | 1 | <a href="#">1750</a> | bi  | 1 | <a href="#">1899</a> |
| 1 | <a href="#">2205</a> | 73   | bi  | 1 | <a href="#">2495</a> | bi  | 1 | <a href="#">2011</a> | bi  | 1 | <a href="#">1751</a> | bi  | 1 | <a href="#">1900</a> |
| 1 | <a href="#">2206</a> | 173  | bi  | 1 | <a href="#">2496</a> | bi  | 1 | <a href="#">2012</a> | bi  | 1 | <a href="#">1752</a> | bi  | 1 | <a href="#">1901</a> |
| 1 | <a href="#">2207</a> | 320  | bi  | 1 | <a href="#">2497</a> | bi  | 1 | <a href="#">2013</a> | bi  | 1 | <a href="#">1753</a> | bi  | 1 | <a href="#">1902</a> |
| 1 | <a href="#">2208</a> | 451  | bi  | 1 | <a href="#">2498</a> | bi  | 1 | <a href="#">2014</a> | bi  | 1 | <a href="#">1754</a> | bi  | 1 | <a href="#">1903</a> |
| 1 | <a href="#">2209</a> | 400  | bi  | 1 | <a href="#">2499</a> | bi  | 1 | <a href="#">2015</a> | bi  | 1 | <a href="#">1755</a> | bi  | 1 | <a href="#">1904</a> |
| 1 | <a href="#">2210</a> | 173  | bi  | 1 | <a href="#">2500</a> | bi  | 1 | <a href="#">2016</a> | bi  | 1 | <a href="#">1756</a> | bi  | 1 | <a href="#">1905</a> |
| 1 | <a href="#">2211</a> | 930  | bi  | 1 | <a href="#">2501</a> | bi  | 1 | <a href="#">2017</a> | bi  | 1 | <a href="#">1757</a> | bi  | 1 | <a href="#">1906</a> |
| 1 | <a href="#">2212</a> | 438  | bi  | 1 | <a href="#">2503</a> | bi  | 1 | <a href="#">2019</a> | bi  | 1 | <a href="#">1758</a> | bi  | 1 | <a href="#">1908</a> |
| 1 | <a href="#">2213</a> | 486  | bi  | 1 | <a href="#">2505</a> | bi  | 1 | <a href="#">2021</a> | bi  | 1 | <a href="#">1759</a> | bi  | 1 | <a href="#">1909</a> |
| 1 | <a href="#">2214</a> | 1452 | bi  | 1 | <a href="#">2506</a> | bi  | 1 | <a href="#">2022</a> | bi  | 1 | <a href="#">1760</a> | bi  | 1 | <a href="#">1910</a> |
| 1 | <a href="#">2215</a> | 573  | bi  | 1 | <a href="#">2514</a> | bi  | 1 | <a href="#">2023</a> | bi  | 1 | <a href="#">1767</a> | bi  | 1 | <a href="#">1917</a> |
| 1 | <a href="#">2216</a> | 423  | bi  | 1 | <a href="#">2515</a> | bi  | 1 | <a href="#">2024</a> | bi  | 1 | <a href="#">1768</a> | bi  | 1 | <a href="#">1918</a> |
| 1 | <a href="#">2217</a> | 32   | -   |   |                      | -   |   |                      | -   |   |                      | -   |   |                      |
| 1 | <a href="#">2218</a> | 260  | bi  | 1 | <a href="#">2516</a> | bi  | 1 | <a href="#">2025</a> | bi  | 1 | <a href="#">1769</a> | uni | 1 | <a href="#">307</a>  |
| 1 | <a href="#">2219</a> | 201  | bi  | 1 | <a href="#">2517</a> | bi  | 1 | <a href="#">2026</a> | bi  | 1 | <a href="#">1770</a> | -   |   |                      |
| 1 | <a href="#">2220</a> | 35   | -   |   |                      | -   |   |                      | -   |   |                      | -   |   |                      |
| 1 | <a href="#">2221</a> | 291  | -   |   |                      | -   |   |                      | -   |   |                      | -   |   |                      |
| 1 | <a href="#">2222</a> | 117  | -   |   |                      | -   |   |                      | -   |   |                      | -   |   |                      |
| 1 | <a href="#">2223</a> | 281  | uni | 1 | <a href="#">350</a>  | uni | 1 | <a href="#">2886</a> | uni | 1 | <a href="#">2483</a> | uni | 1 | <a href="#">2700</a> |
| 1 | <a href="#">2224</a> | 42   | -   |   |                      | -   |   |                      | -   |   |                      | -   |   |                      |
| 1 | <a href="#">2225</a> | 79   | -   |   |                      | -   |   |                      | -   |   |                      | -   |   |                      |
| 1 | <a href="#">2226</a> | 465  | bi  | 1 | <a href="#">2551</a> | bi  | 1 | <a href="#">2032</a> | bi  | 1 | <a href="#">1773</a> | bi  | 1 | <a href="#">1919</a> |
| 1 | <a href="#">2227</a> | 156  | bi  | 1 | <a href="#">2552</a> | bi  | 1 | <a href="#">2033</a> | bi  | 1 | <a href="#">1774</a> | bi  | 1 | <a href="#">1920</a> |
| 1 | <a href="#">2228</a> | 412  | bi  | 1 | <a href="#">2553</a> | bi  | 1 | <a href="#">2034</a> | bi  | 1 | <a href="#">1775</a> | bi  | 1 | <a href="#">1921</a> |
| 1 | <a href="#">2229</a> | 429  | bi  | 1 | <a href="#">2554</a> | bi  | 1 | <a href="#">2035</a> | bi  | 1 | <a href="#">1776</a> | bi  | 1 | <a href="#">1922</a> |
| 1 | <a href="#">2230</a> | 257  | bi  | 1 | <a href="#">2555</a> | bi  | 1 | <a href="#">2036</a> | bi  | 1 | <a href="#">1777</a> | bi  | 1 | <a href="#">1923</a> |
| 1 | <a href="#">2231</a> | 186  | bi  | 1 | <a href="#">2556</a> | bi  | 1 | <a href="#">2037</a> | bi  | 1 | <a href="#">1778</a> | bi  | 1 | <a href="#">1924</a> |
| 1 | <a href="#">2232</a> | 241  | bi  | 1 | <a href="#">2557</a> | bi  | 1 | <a href="#">2038</a> | bi  | 1 | <a href="#">1779</a> | bi  | 1 | <a href="#">1925</a> |
| 1 | <a href="#">2233</a> | 294  | bi  | 1 | <a href="#">2558</a> | bi  | 1 | <a href="#">2039</a> | bi  | 1 | <a href="#">1780</a> | bi  | 1 | <a href="#">1926</a> |
| 1 | <a href="#">2234</a> | 262  | bi  | 1 | <a href="#">2559</a> | bi  | 1 | <a href="#">2040</a> | bi  | 1 | <a href="#">1781</a> | bi  | 1 | <a href="#">1927</a> |
| 1 | <a href="#">2235</a> | 249  | bi  | 1 | <a href="#">2560</a> | bi  | 1 | <a href="#">2041</a> | bi  | 1 | <a href="#">1782</a> | bi  | 1 | <a href="#">1928</a> |
| 1 | <a href="#">2236</a> | 259  | bi  | 1 | <a href="#">2561</a> | bi  | 1 | <a href="#">2042</a> | bi  | 1 | <a href="#">1783</a> | bi  | 1 | <a href="#">1929</a> |
| 1 | <a href="#">2237</a> | 92   | bi  | 1 | <a href="#">2562</a> | bi  | 1 | <a href="#">2043</a> | bi  | 1 | <a href="#">1784</a> | bi  | 1 | <a href="#">1930</a> |
| 1 | <a href="#">2238</a> | 48   | bi  | 1 | <a href="#">2563</a> | bi  | 1 | <a href="#">2044</a> | bi  | 1 | <a href="#">1785</a> | bi  | 1 | <a href="#">1931</a> |
| 1 | <a href="#">2239</a> | 57   | bi  | 1 | <a href="#">2564</a> | bi  | 1 | <a href="#">2045</a> | bi  | 1 | <a href="#">1786</a> | bi  | 1 | <a href="#">1932</a> |
| 1 | <a href="#">2240</a> | 695  | bi  | 1 | <a href="#">2565</a> | bi  | 1 | <a href="#">2046</a> | bi  | 1 | <a href="#">1787</a> | bi  | 1 | <a href="#">1933</a> |
| 1 | <a href="#">2241</a> | 303  | bi  | 1 | <a href="#">2566</a> | bi  | 1 | <a href="#">2047</a> | bi  | 1 | <a href="#">1788</a> | bi  | 1 | <a href="#">1934</a> |

|   |                      |      |    |   |                      |    |   |                      |    |   |                      |     |   |                      |
|---|----------------------|------|----|---|----------------------|----|---|----------------------|----|---|----------------------|-----|---|----------------------|
| 1 | <a href="#">2242</a> | 34   | -  |   |                      | -  |   |                      | -  |   |                      | -   |   |                      |
| 1 | <a href="#">2243</a> | 263  | bi | 1 | <a href="#">2567</a> | bi | 1 | <a href="#">2048</a> | bi | 1 | <a href="#">1789</a> | bi  | 1 | <a href="#">1935</a> |
| 1 | <a href="#">2244</a> | 301  | bi | 1 | <a href="#">2568</a> | bi | 1 | <a href="#">2049</a> | bi | 1 | <a href="#">1790</a> | bi  | 1 | <a href="#">1936</a> |
| 1 | <a href="#">2245</a> | 136  | bi | 1 | <a href="#">2569</a> | bi | 1 | <a href="#">2050</a> | bi | 1 | <a href="#">1791</a> | bi  | 1 | <a href="#">1937</a> |
| 1 | <a href="#">2246</a> | 160  | bi | 1 | <a href="#">2570</a> | bi | 1 | <a href="#">2051</a> | bi | 1 | <a href="#">1792</a> | bi  | 1 | <a href="#">1938</a> |
| 1 | <a href="#">2247</a> | 733  | bi | 1 | <a href="#">2571</a> | bi | 1 | <a href="#">2052</a> | bi | 1 | <a href="#">1793</a> | bi  | 1 | <a href="#">1939</a> |
| 1 | <a href="#">2248</a> | 325  | bi | 1 | <a href="#">2572</a> | bi | 1 | <a href="#">2053</a> | bi | 1 | <a href="#">1794</a> | bi  | 1 | <a href="#">1940</a> |
| 1 | <a href="#">2249</a> | 150  | bi | 1 | <a href="#">2573</a> | bi | 1 | <a href="#">2054</a> | bi | 1 | <a href="#">1795</a> | bi  | 1 | <a href="#">1941</a> |
| 1 | <a href="#">2250</a> | 59   | bi | 1 | <a href="#">2574</a> | bi | 1 | <a href="#">2055</a> | bi | 1 | <a href="#">1796</a> | bi  | 1 | <a href="#">1942</a> |
| 1 | <a href="#">2251</a> | 145  | bi | 1 | <a href="#">2575</a> | bi | 1 | <a href="#">2056</a> | bi | 1 | <a href="#">1797</a> | bi  | 1 | <a href="#">1943</a> |
| 1 | <a href="#">2252</a> | 277  | bi | 1 | <a href="#">2576</a> | bi | 1 | <a href="#">2057</a> | bi | 1 | <a href="#">1798</a> | bi  | 1 | <a href="#">1944</a> |
| 1 | <a href="#">2253</a> | 288  | bi | 1 | <a href="#">2577</a> | bi | 1 | <a href="#">2058</a> | bi | 1 | <a href="#">1799</a> | bi  | 1 | <a href="#">1945</a> |
| 1 | <a href="#">2254</a> | 352  | bi | 1 | <a href="#">2578</a> | bi | 1 | <a href="#">2059</a> | bi | 1 | <a href="#">1800</a> | bi  | 1 | <a href="#">1946</a> |
| 1 | <a href="#">2255</a> | 431  | bi | 1 | <a href="#">2579</a> | bi | 1 | <a href="#">2060</a> | bi | 1 | <a href="#">1801</a> | bi  | 1 | <a href="#">1947</a> |
| 1 | <a href="#">2256</a> | 96   | bi | 1 | <a href="#">2580</a> | bi | 1 | <a href="#">2061</a> | bi | 1 | <a href="#">1802</a> | bi  | 1 | <a href="#">1948</a> |
| 1 | <a href="#">2257</a> | 261  | bi | 1 | <a href="#">2581</a> | bi | 1 | <a href="#">2062</a> | bi | 1 | <a href="#">1803</a> | bi  | 1 | <a href="#">1949</a> |
| 1 | <a href="#">2258</a> | 575  | bi | 1 | <a href="#">2582</a> | bi | 1 | <a href="#">2063</a> | bi | 1 | <a href="#">1804</a> | bi  | 1 | <a href="#">1950</a> |
| 1 | <a href="#">2259</a> | 484  | bi | 1 | <a href="#">2583</a> | bi | 1 | <a href="#">2064</a> | bi | 1 | <a href="#">1805</a> | bi  | 1 | <a href="#">1951</a> |
| 1 | <a href="#">2260</a> | 343  | bi | 1 | <a href="#">2584</a> | bi | 1 | <a href="#">2065</a> | bi | 1 | <a href="#">1806</a> | bi  | 1 | <a href="#">1952</a> |
| 1 | <a href="#">2261</a> | 111  | bi | 1 | <a href="#">2585</a> | bi | 1 | <a href="#">2066</a> | bi | 1 | <a href="#">1807</a> | bi  | 1 | <a href="#">1953</a> |
| 1 | <a href="#">2262</a> | 326  | bi | 1 | <a href="#">2586</a> | bi | 1 | <a href="#">2067</a> | bi | 1 | <a href="#">1808</a> | bi  | 1 | <a href="#">1954</a> |
| 1 | <a href="#">2263</a> | 444  | bi | 1 | <a href="#">2587</a> | bi | 1 | <a href="#">2068</a> | bi | 1 | <a href="#">1809</a> | bi  | 1 | <a href="#">1955</a> |
| 1 | <a href="#">2264</a> | 462  | bi | 1 | <a href="#">2588</a> | bi | 1 | <a href="#">2069</a> | bi | 1 | <a href="#">1810</a> | bi  | 1 | <a href="#">1956</a> |
| 1 | <a href="#">2265</a> | 209  | bi | 1 | <a href="#">2589</a> | bi | 1 | <a href="#">2070</a> | bi | 1 | <a href="#">1811</a> | bi  | 1 | <a href="#">1957</a> |
| 1 | <a href="#">2266</a> | 237  | bi | 1 | <a href="#">2590</a> | bi | 1 | <a href="#">2071</a> | bi | 1 | <a href="#">1812</a> | bi  | 1 | <a href="#">1958</a> |
| 1 | <a href="#">2267</a> | 283  | bi | 1 | <a href="#">2591</a> | bi | 1 | <a href="#">2072</a> | bi | 1 | <a href="#">1813</a> | bi  | 1 | <a href="#">1959</a> |
| 1 | <a href="#">2268</a> | 485  | bi | 1 | <a href="#">2592</a> | bi | 1 | <a href="#">2073</a> | bi | 1 | <a href="#">1814</a> | bi  | 1 | <a href="#">1960</a> |
| 1 | <a href="#">2269</a> | 297  | bi | 1 | <a href="#">2593</a> | bi | 1 | <a href="#">2074</a> | bi | 1 | <a href="#">1815</a> | bi  | 1 | <a href="#">1961</a> |
| 1 | <a href="#">2270</a> | 370  | bi | 1 | <a href="#">2594</a> | bi | 1 | <a href="#">2075</a> | bi | 1 | <a href="#">1816</a> | bi  | 1 | <a href="#">1962</a> |
| 1 | <a href="#">2271</a> | 165  | bi | 1 | <a href="#">2595</a> | bi | 1 | <a href="#">2076</a> | bi | 1 | <a href="#">1818</a> | bi  | 1 | <a href="#">1963</a> |
| 1 | <a href="#">2272</a> | 277  | bi | 1 | <a href="#">2596</a> | bi | 1 | <a href="#">2077</a> | bi | 1 | <a href="#">1819</a> | bi  | 1 | <a href="#">1964</a> |
| 1 | <a href="#">2273</a> | 250  | bi | 1 | <a href="#">2597</a> | bi | 1 | <a href="#">2078</a> | bi | 1 | <a href="#">1820</a> | bi  | 1 | <a href="#">1965</a> |
| 1 | <a href="#">2274</a> | 208  | bi | 1 | <a href="#">2598</a> | bi | 1 | <a href="#">2079</a> | bi | 1 | <a href="#">1821</a> | bi  | 1 | <a href="#">1966</a> |
| 1 | <a href="#">2275</a> | 345  | bi | 1 | <a href="#">2599</a> | bi | 1 | <a href="#">2080</a> | bi | 1 | <a href="#">1822</a> | bi  | 1 | <a href="#">1967</a> |
| 1 | <a href="#">2276</a> | 84   | bi | 1 | <a href="#">2600</a> | bi | 1 | <a href="#">2081</a> | bi | 1 | <a href="#">1823</a> | bi  | 1 | <a href="#">1968</a> |
| 1 | <a href="#">2277</a> | 179  | bi | 1 | <a href="#">2601</a> | bi | 1 | <a href="#">2082</a> | bi | 1 | <a href="#">1824</a> | bi  | 1 | <a href="#">1969</a> |
| 1 | <a href="#">2278</a> | 314  | bi | 1 | <a href="#">2602</a> | bi | 1 | <a href="#">2083</a> | bi | 1 | <a href="#">1825</a> | bi  | 1 | <a href="#">1970</a> |
| 1 | <a href="#">2279</a> | 343  | bi | 1 | <a href="#">2603</a> | bi | 1 | <a href="#">2084</a> | bi | 1 | <a href="#">1826</a> | bi  | 1 | <a href="#">1971</a> |
| 1 | <a href="#">2280</a> | 780  | bi | 1 | <a href="#">2604</a> | bi | 1 | <a href="#">2085</a> | bi | 1 | <a href="#">1827</a> | bi  | 1 | <a href="#">1972</a> |
| 1 | <a href="#">2281</a> | 168  | bi | 1 | <a href="#">2605</a> | bi | 1 | <a href="#">2086</a> | bi | 1 | <a href="#">1828</a> | bi  | 1 | <a href="#">1973</a> |
| 1 | <a href="#">2282</a> | 215  | bi | 1 | <a href="#">2606</a> | bi | 1 | <a href="#">2087</a> | bi | 1 | <a href="#">1829</a> | bi  | 1 | <a href="#">1974</a> |
| 1 | <a href="#">2283</a> | 351  | bi | 1 | <a href="#">2607</a> | bi | 1 | <a href="#">2088</a> | bi | 1 | <a href="#">1831</a> | bi  | 1 | <a href="#">1975</a> |
| 1 | <a href="#">2284</a> | 164  | bi | 1 | <a href="#">2608</a> | bi | 1 | <a href="#">2089</a> | bi | 1 | <a href="#">1832</a> | bi  | 1 | <a href="#">1976</a> |
| 1 | <a href="#">2285</a> | 185  | bi | 1 | <a href="#">2609</a> | bi | 1 | <a href="#">2090</a> | bi | 1 | <a href="#">1833</a> | bi  | 1 | <a href="#">1977</a> |
| 1 | <a href="#">2286</a> | 117  | bi | 1 | <a href="#">2610</a> | bi | 1 | <a href="#">2091</a> | bi | 1 | <a href="#">1834</a> | bi  | 1 | <a href="#">1978</a> |
| 1 | <a href="#">2287</a> | 145  | bi | 1 | <a href="#">2611</a> | bi | 1 | <a href="#">2092</a> | bi | 1 | <a href="#">1835</a> | bi  | 1 | <a href="#">1979</a> |
| 1 | <a href="#">2288</a> | 375  | bi | 1 | <a href="#">2612</a> | bi | 1 | <a href="#">2093</a> | bi | 1 | <a href="#">1836</a> | bi  | 1 | <a href="#">1980</a> |
| 1 | <a href="#">2289</a> | 1143 | bi | 1 | <a href="#">2613</a> | bi | 1 | <a href="#">2094</a> | bi | 1 | <a href="#">1837</a> | bi  | 1 | <a href="#">1981</a> |
| 1 | <a href="#">2290</a> | 403  | bi | 1 | <a href="#">2614</a> | bi | 1 | <a href="#">2095</a> | bi | 1 | <a href="#">1838</a> | bi  | 1 | <a href="#">1982</a> |
| 1 | <a href="#">2291</a> | 102  | bi | 1 | <a href="#">2615</a> | bi | 1 | <a href="#">2096</a> | bi | 1 | <a href="#">1839</a> | bi  | 1 | <a href="#">1983</a> |
| 1 | <a href="#">2292</a> | 590  | bi | 1 | <a href="#">2616</a> | bi | 1 | <a href="#">2097</a> | bi | 1 | <a href="#">1840</a> | bi  | 1 | <a href="#">1984</a> |
| 1 | <a href="#">2293</a> | 612  | bi | 1 | <a href="#">2617</a> | bi | 1 | <a href="#">2098</a> | bi | 1 | <a href="#">1841</a> | bi  | 1 | <a href="#">1985</a> |
| 1 | <a href="#">2294</a> | 261  | bi | 1 | <a href="#">2618</a> | bi | 1 | <a href="#">2099</a> | bi | 1 | <a href="#">1842</a> | bi  | 1 | <a href="#">1986</a> |
| 1 | <a href="#">2295</a> | 93   | bi | 1 | <a href="#">2619</a> | bi | 1 | <a href="#">2100</a> | bi | 1 | <a href="#">1843</a> | bi  | 1 | <a href="#">1987</a> |
| 1 | <a href="#">2296</a> | 422  | bi | 1 | <a href="#">2620</a> | bi | 1 | <a href="#">2101</a> | bi | 1 | <a href="#">1844</a> | bi  | 1 | <a href="#">1988</a> |
| 1 | <a href="#">2297</a> | 330  | bi | 1 | <a href="#">2621</a> | bi | 1 | <a href="#">2102</a> | bi | 1 | <a href="#">1845</a> | uni | 1 | <a href="#">712</a>  |
| 1 | <a href="#">2298</a> | 48   | bi | 1 | <a href="#">2622</a> | bi | 1 | <a href="#">2103</a> | bi | 1 | <a href="#">1846</a> | -   |   |                      |

|   |                      |      |     |   |                      |     |   |                      |     |   |                      |     |   |                      |
|---|----------------------|------|-----|---|----------------------|-----|---|----------------------|-----|---|----------------------|-----|---|----------------------|
| 1 | <a href="#">2299</a> | 1512 | bi  | 1 | <a href="#">2623</a> | bi  | 1 | <a href="#">2104</a> | bi  | 1 | <a href="#">1847</a> | uni | 1 | <a href="#">1088</a> |
| 1 | <a href="#">2300</a> | 93   | bi  | 1 | <a href="#">2624</a> | bi  | 1 | <a href="#">2105</a> | bi  | 1 | <a href="#">1848</a> | bi  | 1 | <a href="#">1989</a> |
| 1 | <a href="#">2301</a> | 108  | bi  | 1 | <a href="#">2626</a> | bi  | 1 | <a href="#">2107</a> | bi  | 1 | <a href="#">1849</a> | bi  | 1 | <a href="#">1990</a> |
| 1 | <a href="#">2302</a> | 172  | bi  | 1 | <a href="#">2627</a> | bi  | 1 | <a href="#">2108</a> | bi  | 1 | <a href="#">1850</a> | bi  | 1 | <a href="#">1991</a> |
| 1 | <a href="#">2303</a> | 564  | bi  | 1 | <a href="#">2628</a> | bi  | 1 | <a href="#">2109</a> | bi  | 1 | <a href="#">1851</a> | bi  | 1 | <a href="#">1992</a> |
| 1 | <a href="#">2304</a> | 349  | bi  | 1 | <a href="#">2629</a> | bi  | 1 | <a href="#">2110</a> | bi  | 1 | <a href="#">1852</a> | bi  | 1 | <a href="#">1993</a> |
| 1 | <a href="#">2305</a> | 155  | bi  | 1 | <a href="#">2630</a> | bi  | 1 | <a href="#">2111</a> | bi  | 1 | <a href="#">1853</a> | bi  | 1 | <a href="#">1994</a> |
| 1 | <a href="#">2306</a> | 156  | bi  | 1 | <a href="#">2631</a> | bi  | 1 | <a href="#">2112</a> | bi  | 1 | <a href="#">1854</a> | bi  | 1 | <a href="#">1995</a> |
| 1 | <a href="#">2307</a> | 252  | bi  | 1 | <a href="#">2632</a> | bi  | 1 | <a href="#">2113</a> | bi  | 1 | <a href="#">1855</a> | bi  | 1 | <a href="#">1996</a> |
| 1 | <a href="#">2308</a> | 681  | bi  | 1 | <a href="#">2633</a> | bi  | 1 | <a href="#">2114</a> | bi  | 1 | <a href="#">1856</a> | bi  | 1 | <a href="#">1997</a> |
| 1 | <a href="#">2309</a> | 411  | bi  | 1 | <a href="#">2634</a> | bi  | 1 | <a href="#">2115</a> | bi  | 1 | <a href="#">1857</a> | bi  | 1 | <a href="#">1999</a> |
| 1 | <a href="#">2310</a> | 382  | bi  | 1 | <a href="#">2635</a> | bi  | 1 | <a href="#">2116</a> | bi  | 1 | <a href="#">1858</a> | bi  | 1 | <a href="#">2000</a> |
| 1 | <a href="#">2311</a> | 270  | bi  | 1 | <a href="#">2636</a> | bi  | 1 | <a href="#">2117</a> | bi  | 1 | <a href="#">1859</a> | bi  | 1 | <a href="#">2001</a> |
| 1 | <a href="#">2312</a> | 248  | -   |   |                      | -   |   |                      | -   |   |                      | bi  | 1 | <a href="#">1544</a> |
| 1 | <a href="#">2313</a> | 244  | bi  | 1 | <a href="#">2638</a> | bi  | 1 | <a href="#">2119</a> | bi  | 1 | <a href="#">1860</a> | bi  | 1 | <a href="#">2006</a> |
| 1 | <a href="#">2314</a> | 76   | bi  | 1 | <a href="#">2639</a> | bi  | 1 | <a href="#">2120</a> | bi  | 1 | <a href="#">1861</a> | bi  | 1 | <a href="#">2007</a> |
| 1 | <a href="#">2315</a> | 217  | bi  | 1 | <a href="#">2640</a> | bi  | 1 | <a href="#">2121</a> | bi  | 1 | <a href="#">1862</a> | bi  | 1 | <a href="#">2008</a> |
| 1 | <a href="#">2316</a> | 271  | uni | 1 | <a href="#">2421</a> | uni | 1 | <a href="#">1786</a> | uni | 1 | <a href="#">1677</a> | uni | 1 | <a href="#">1782</a> |
| 1 | <a href="#">2317</a> | 448  | uni | 1 | <a href="#">2420</a> | uni | 1 | <a href="#">1785</a> | uni | 1 | <a href="#">1676</a> | uni | 1 | <a href="#">1781</a> |
| 1 | <a href="#">2318</a> | 380  | -   |   |                      | -   |   |                      | -   |   |                      | -   |   |                      |
| 1 | <a href="#">2319</a> | 133  | -   |   |                      | -   |   |                      | -   |   |                      | -   |   |                      |
| 1 | <a href="#">2320</a> | 818  | uni | 1 | <a href="#">2825</a> | uni | 1 | <a href="#">2370</a> | uni | 1 | <a href="#">2044</a> | uni | 1 | <a href="#">2198</a> |
| 1 | <a href="#">2321</a> | 284  | -   |   |                      | -   |   |                      | -   |   |                      | -   |   |                      |
| 1 | <a href="#">2322</a> | 837  | uni | 1 | <a href="#">2414</a> | uni | 1 | <a href="#">1783</a> | uni | 1 | <a href="#">1665</a> | uni | 1 | <a href="#">1775</a> |
| 1 | <a href="#">2323</a> | 489  | uni | 1 | <a href="#">2409</a> | uni | 1 | <a href="#">1773</a> | uni | 1 | <a href="#">1685</a> | uni | 1 | <a href="#">1770</a> |
| 1 | <a href="#">2324</a> | 390  | -   |   |                      | -   |   |                      | bi  | 1 | <a href="#">1664</a> | -   |   |                      |
| 1 | <a href="#">2325</a> | 267  | bi  | 1 | <a href="#">2641</a> | bi  | 1 | <a href="#">2122</a> | bi  | 1 | <a href="#">1863</a> | bi  | 1 | <a href="#">2009</a> |
| 1 | <a href="#">2326</a> | 272  | bi  | 1 | <a href="#">2642</a> | bi  | 1 | <a href="#">2123</a> | bi  | 1 | <a href="#">1864</a> | bi  | 1 | <a href="#">2010</a> |
| 1 | <a href="#">2327</a> | 273  | bi  | 1 | <a href="#">2643</a> | bi  | 1 | <a href="#">2124</a> | bi  | 1 | <a href="#">1865</a> | bi  | 1 | <a href="#">2011</a> |
| 1 | <a href="#">2328</a> | 229  | bi  | 1 | <a href="#">2644</a> | bi  | 1 | <a href="#">2125</a> | bi  | 1 | <a href="#">1866</a> | bi  | 1 | <a href="#">2012</a> |
| 1 | <a href="#">2329</a> | 346  | bi  | 1 | <a href="#">2645</a> | bi  | 1 | <a href="#">2126</a> | bi  | 1 | <a href="#">1867</a> | bi  | 1 | <a href="#">2013</a> |
| 1 | <a href="#">2330</a> | 31   | -   |   |                      | -   |   |                      | -   |   |                      | -   |   |                      |
| 1 | <a href="#">2331</a> | 105  | bi  | 1 | <a href="#">2646</a> | bi  | 1 | <a href="#">2127</a> | bi  | 1 | <a href="#">1868</a> | bi  | 1 | <a href="#">2015</a> |
| 1 | <a href="#">2332</a> | 120  | bi  | 1 | <a href="#">2647</a> | bi  | 1 | <a href="#">2128</a> | bi  | 1 | <a href="#">1869</a> | bi  | 1 | <a href="#">2016</a> |
| 1 | <a href="#">2333</a> | 396  | bi  | 1 | <a href="#">2648</a> | bi  | 1 | <a href="#">2129</a> | bi  | 1 | <a href="#">1870</a> | bi  | 1 | <a href="#">2017</a> |
| 1 | <a href="#">2334</a> | 479  | bi  | 1 | <a href="#">2649</a> | bi  | 1 | <a href="#">2130</a> | bi  | 1 | <a href="#">1871</a> | bi  | 1 | <a href="#">2019</a> |
| 1 | <a href="#">2335</a> | 234  | bi  | 1 | <a href="#">2650</a> | bi  | 1 | <a href="#">2131</a> | bi  | 1 | <a href="#">1872</a> | bi  | 1 | <a href="#">2020</a> |
| 1 | <a href="#">2336</a> | 1652 | bi  | 1 | <a href="#">2651</a> | bi  | 1 | <a href="#">2132</a> | bi  | 1 | <a href="#">1873</a> | bi  | 1 | <a href="#">2021</a> |
| 1 | <a href="#">2337</a> | 444  | bi  | 1 | <a href="#">2652</a> | bi  | 1 | <a href="#">2133</a> | bi  | 1 | <a href="#">1874</a> | bi  | 1 | <a href="#">2023</a> |
| 1 | <a href="#">2338</a> | 184  | bi  | 1 | <a href="#">2653</a> | bi  | 1 | <a href="#">2134</a> | bi  | 1 | <a href="#">1875</a> | bi  | 1 | <a href="#">2024</a> |
| 1 | <a href="#">2339</a> | 236  | bi  | 1 | <a href="#">2654</a> | bi  | 1 | <a href="#">2135</a> | bi  | 1 | <a href="#">1876</a> | bi  | 1 | <a href="#">2025</a> |
| 1 | <a href="#">2340</a> | 120  | -   |   |                      | -   |   |                      | -   |   |                      | -   |   |                      |
| 1 | <a href="#">2341</a> | 179  | -   |   |                      | -   |   |                      | -   |   |                      | -   |   |                      |
| 1 | <a href="#">2342</a> | 75   | -   |   |                      | -   |   |                      | -   |   |                      | -   |   |                      |
| 1 | <a href="#">2343</a> | 343  | uni | 1 | <a href="#">2305</a> | bi  | 3 | <a href="#">2989</a> | -   |   |                      | uni | 1 | <a href="#">386</a>  |
| 1 | <a href="#">2344</a> | 682  | -   |   |                      | -   |   |                      | -   |   |                      | -   |   |                      |
| 1 | <a href="#">2345</a> | 835  | uni | 1 | <a href="#">520</a>  | -   |   |                      | uni | 1 | <a href="#">780</a>  | -   |   |                      |
| 1 | <a href="#">2346</a> | 73   | uni | 2 | <a href="#">2927</a> | -   |   |                      | -   |   |                      | -   |   |                      |
| 1 | <a href="#">2347</a> | 130  | -   |   |                      | -   |   |                      | -   |   |                      | -   |   |                      |
| 1 | <a href="#">2348</a> | 75   | -   |   |                      | -   |   |                      | -   |   |                      | -   |   |                      |
| 1 | <a href="#">2349</a> | 329  | uni | 1 | <a href="#">2185</a> | -   |   |                      | uni | 1 | <a href="#">783</a>  | -   |   |                      |
| 1 | <a href="#">2350</a> | 156  | -   |   |                      | -   |   |                      | -   |   |                      | -   |   |                      |
| 1 | <a href="#">2351</a> | 184  | -   |   |                      | -   |   |                      | -   |   |                      | -   |   |                      |
| 1 | <a href="#">2352</a> | 243  | uni | 1 | <a href="#">133</a>  | uni | 1 | <a href="#">2667</a> | uni | 1 | <a href="#">2275</a> | uni | 1 | <a href="#">2491</a> |
| 1 | <a href="#">2353</a> | 658  | uni | 1 | <a href="#">1124</a> | uni | 1 | <a href="#">595</a>  | uni | 1 | <a href="#">496</a>  | -   |   |                      |
| 1 | <a href="#">2354</a> | 189  | -   |   |                      | -   |   |                      | -   |   |                      | -   |   |                      |
| 1 | <a href="#">2355</a> | 205  | -   |   |                      | -   |   |                      | -   |   |                      | -   |   |                      |

|   |                      |      |     |   |                      |     |   |                      |     |   |                      |     |   |                      |
|---|----------------------|------|-----|---|----------------------|-----|---|----------------------|-----|---|----------------------|-----|---|----------------------|
| 1 | <a href="#">2356</a> | 428  | uni | 1 | <a href="#">2481</a> | uni | 1 | <a href="#">1999</a> | uni | 1 | <a href="#">772</a>  | -   |   |                      |
| 1 | <a href="#">2357</a> | 142  | -   |   |                      | -   |   |                      | -   |   |                      | -   |   |                      |
| 1 | <a href="#">2358</a> | 172  | -   |   |                      | -   |   |                      | -   |   |                      | -   |   |                      |
| 1 | <a href="#">2359</a> | 99   | -   |   |                      | -   |   |                      | -   |   |                      | -   |   |                      |
| 1 | <a href="#">2360</a> | 89   | -   |   |                      | -   |   |                      | -   |   |                      | -   |   |                      |
| 1 | <a href="#">2361</a> | 503  | uni | 1 | <a href="#">2202</a> | uni | 1 | <a href="#">1720</a> | uni | 1 | <a href="#">769</a>  | uni | 1 | <a href="#">1718</a> |
| 1 | <a href="#">2362</a> | 123  | -   |   |                      | -   |   |                      | -   |   |                      | -   |   |                      |
| 1 | <a href="#">2363</a> | 111  | -   |   |                      | -   |   |                      | -   |   |                      | -   |   |                      |
| 1 | <a href="#">2364</a> | 108  | -   |   |                      | -   |   |                      | -   |   |                      | -   |   |                      |
| 1 | <a href="#">2365</a> | 80   | -   |   |                      | -   |   |                      | -   |   |                      | -   |   |                      |
| 1 | <a href="#">2366</a> | 51   | -   |   |                      | -   |   |                      | -   |   |                      | -   |   |                      |
| 1 | <a href="#">2367</a> | 75   | -   |   |                      | -   |   |                      | -   |   |                      | -   |   |                      |
| 1 | <a href="#">2368</a> | 135  | -   |   |                      | -   |   |                      | -   |   |                      | -   |   |                      |
| 1 | <a href="#">2369</a> | 109  | -   |   |                      | -   |   |                      | -   |   |                      | -   |   |                      |
| 1 | <a href="#">2370</a> | 84   | -   |   |                      | -   |   |                      | -   |   |                      | -   |   |                      |
| 1 | <a href="#">2371</a> | 60   | -   |   |                      | -   |   |                      | -   |   |                      | -   |   |                      |
| 1 | <a href="#">2372</a> | 127  | bi  | 1 | <a href="#">2771</a> | bi  | 1 | <a href="#">2315</a> | -   |   |                      | bi  | 1 | <a href="#">2143</a> |
| 1 | <a href="#">2373</a> | 172  | bi  | 1 | <a href="#">1315</a> | -   |   |                      | -   |   |                      | -   |   |                      |
| 1 | <a href="#">2374</a> | 380  | uni | 1 | <a href="#">530</a>  | uni | 1 | <a href="#">1841</a> | bi  | 1 | <a href="#">807</a>  | uni | 1 | <a href="#">1522</a> |
| 1 | <a href="#">2375</a> | 79   | bi  | 1 | <a href="#">2656</a> | bi  | 1 | <a href="#">2137</a> | bi  | 1 | <a href="#">1878</a> | bi  | 1 | <a href="#">2027</a> |
| 1 | <a href="#">2376</a> | 91   | bi  | 1 | <a href="#">2657</a> | bi  | 1 | <a href="#">2138</a> | bi  | 1 | <a href="#">1879</a> | bi  | 1 | <a href="#">2028</a> |
| 1 | <a href="#">2377</a> | 210  | bi  | 1 | <a href="#">2658</a> | bi  | 1 | <a href="#">2139</a> | bi  | 1 | <a href="#">1880</a> | bi  | 1 | <a href="#">2029</a> |
| 1 | <a href="#">2378</a> | 413  | bi  | 1 | <a href="#">2659</a> | bi  | 1 | <a href="#">2140</a> | bi  | 1 | <a href="#">1881</a> | bi  | 1 | <a href="#">2030</a> |
| 1 | <a href="#">2379</a> | 341  | bi  | 1 | <a href="#">2660</a> | bi  | 1 | <a href="#">2141</a> | bi  | 1 | <a href="#">1882</a> | bi  | 1 | <a href="#">2031</a> |
| 1 | <a href="#">2380</a> | 278  | bi  | 1 | <a href="#">2661</a> | bi  | 1 | <a href="#">2142</a> | bi  | 1 | <a href="#">1883</a> | bi  | 1 | <a href="#">2032</a> |
| 1 | <a href="#">2381</a> | 358  | bi  | 1 | <a href="#">2662</a> | bi  | 1 | <a href="#">2143</a> | bi  | 1 | <a href="#">1884</a> | bi  | 1 | <a href="#">2033</a> |
| 1 | <a href="#">2382</a> | 195  | bi  | 1 | <a href="#">2663</a> | bi  | 1 | <a href="#">2144</a> | bi  | 1 | <a href="#">1885</a> | bi  | 1 | <a href="#">2034</a> |
| 1 | <a href="#">2383</a> | 506  | bi  | 1 | <a href="#">2665</a> | bi  | 1 | <a href="#">2145</a> | bi  | 1 | <a href="#">1886</a> | bi  | 1 | <a href="#">2035</a> |
| 1 | <a href="#">2384</a> | 472  | bi  | 1 | <a href="#">2666</a> | bi  | 1 | <a href="#">2146</a> | bi  | 1 | <a href="#">1887</a> | bi  | 1 | <a href="#">2036</a> |
| 1 | <a href="#">2385</a> | 1178 | bi  | 1 | <a href="#">2667</a> | bi  | 1 | <a href="#">2147</a> | bi  | 1 | <a href="#">1888</a> | bi  | 1 | <a href="#">2037</a> |
| 1 | <a href="#">2386</a> | 473  | bi  | 1 | <a href="#">2668</a> | bi  | 1 | <a href="#">2148</a> | bi  | 1 | <a href="#">1889</a> | bi  | 1 | <a href="#">2038</a> |
| 1 | <a href="#">2387</a> | 280  | bi  | 1 | <a href="#">2669</a> | bi  | 1 | <a href="#">2149</a> | bi  | 1 | <a href="#">1890</a> | bi  | 1 | <a href="#">2039</a> |
| 1 | <a href="#">2388</a> | 153  | bi  | 1 | <a href="#">2670</a> | bi  | 1 | <a href="#">2150</a> | bi  | 1 | <a href="#">1891</a> | bi  | 1 | <a href="#">2040</a> |
| 1 | <a href="#">2389</a> | 265  | bi  | 1 | <a href="#">2671</a> | bi  | 1 | <a href="#">2151</a> | bi  | 1 | <a href="#">1892</a> | bi  | 1 | <a href="#">2041</a> |
| 1 | <a href="#">2390</a> | 252  | bi  | 1 | <a href="#">2672</a> | bi  | 1 | <a href="#">2152</a> | bi  | 1 | <a href="#">1893</a> | bi  | 1 | <a href="#">2042</a> |
| 1 | <a href="#">2391</a> | 86   | bi  | 1 | <a href="#">2673</a> | bi  | 1 | <a href="#">2153</a> | bi  | 1 | <a href="#">1894</a> | bi  | 1 | <a href="#">2043</a> |
| 1 | <a href="#">2392</a> | 196  | bi  | 1 | <a href="#">2674</a> | bi  | 1 | <a href="#">2154</a> | bi  | 1 | <a href="#">1895</a> | bi  | 1 | <a href="#">2044</a> |
| 1 | <a href="#">2393</a> | 341  | bi  | 1 | <a href="#">2675</a> | bi  | 1 | <a href="#">2155</a> | bi  | 1 | <a href="#">1896</a> | bi  | 1 | <a href="#">2045</a> |
| 1 | <a href="#">2394</a> | 383  | bi  | 1 | <a href="#">2676</a> | bi  | 1 | <a href="#">2156</a> | bi  | 1 | <a href="#">1897</a> | bi  | 1 | <a href="#">2046</a> |
| 1 | <a href="#">2395</a> | 194  | bi  | 1 | <a href="#">2677</a> | bi  | 1 | <a href="#">2157</a> | bi  | 1 | <a href="#">1898</a> | bi  | 1 | <a href="#">2047</a> |
| 1 | <a href="#">2396</a> | 858  | bi  | 1 | <a href="#">2678</a> | bi  | 1 | <a href="#">2158</a> | bi  | 1 | <a href="#">1899</a> | bi  | 1 | <a href="#">2048</a> |
| 1 | <a href="#">2397</a> | 336  | bi  | 1 | <a href="#">2679</a> | bi  | 1 | <a href="#">2159</a> | bi  | 1 | <a href="#">1900</a> | bi  | 1 | <a href="#">2049</a> |
| 1 | <a href="#">2398</a> | 120  | bi  | 1 | <a href="#">2680</a> | bi  | 1 | <a href="#">2160</a> | bi  | 1 | <a href="#">1901</a> | bi  | 1 | <a href="#">2050</a> |
| 1 | <a href="#">2399</a> | 440  | bi  | 1 | <a href="#">2681</a> | bi  | 1 | <a href="#">2161</a> | bi  | 1 | <a href="#">1902</a> | bi  | 1 | <a href="#">2051</a> |
| 1 | <a href="#">2400</a> | 127  | bi  | 1 | <a href="#">2682</a> | bi  | 1 | <a href="#">2162</a> | bi  | 1 | <a href="#">1903</a> | bi  | 1 | <a href="#">2052</a> |
| 1 | <a href="#">2401</a> | 315  | bi  | 1 | <a href="#">2683</a> | bi  | 1 | <a href="#">2163</a> | bi  | 1 | <a href="#">1904</a> | bi  | 1 | <a href="#">2053</a> |
| 1 | <a href="#">2402</a> | 38   | bi  | 1 | <a href="#">2684</a> | -   |   |                      | -   |   |                      | bi  | 1 | <a href="#">2054</a> |
| 1 | <a href="#">2403</a> | 398  | bi  | 1 | <a href="#">2685</a> | bi  | 1 | <a href="#">2164</a> | bi  | 1 | <a href="#">1905</a> | bi  | 1 | <a href="#">2055</a> |
| 1 | <a href="#">2404</a> | 421  | bi  | 1 | <a href="#">2686</a> | bi  | 1 | <a href="#">2165</a> | bi  | 1 | <a href="#">1906</a> | bi  | 1 | <a href="#">2056</a> |
| 1 | <a href="#">2405</a> | 388  | bi  | 1 | <a href="#">2687</a> | bi  | 1 | <a href="#">2166</a> | bi  | 1 | <a href="#">1907</a> | bi  | 1 | <a href="#">2057</a> |
| 1 | <a href="#">2406</a> | 458  | bi  | 1 | <a href="#">2688</a> | bi  | 1 | <a href="#">2167</a> | bi  | 1 | <a href="#">1908</a> | bi  | 1 | <a href="#">2058</a> |
| 1 | <a href="#">2407</a> | 1002 | bi  | 1 | <a href="#">2689</a> | bi  | 1 | <a href="#">2168</a> | bi  | 1 | <a href="#">1909</a> | bi  | 1 | <a href="#">2059</a> |
| 1 | <a href="#">2408</a> | 445  | bi  | 1 | <a href="#">2690</a> | bi  | 1 | <a href="#">2169</a> | bi  | 1 | <a href="#">1910</a> | bi  | 1 | <a href="#">2060</a> |
| 1 | <a href="#">2409</a> | 213  | bi  | 1 | <a href="#">2691</a> | bi  | 1 | <a href="#">2170</a> | bi  | 1 | <a href="#">1911</a> | bi  | 1 | <a href="#">2061</a> |
| 1 | <a href="#">2410</a> | 56   | -   |   |                      | -   |   |                      | -   |   |                      | -   |   |                      |
| 1 | <a href="#">2411</a> | 451  | bi  | 1 | <a href="#">2692</a> | bi  | 1 | <a href="#">2171</a> | bi  | 1 | <a href="#">1912</a> | bi  | 1 | <a href="#">2062</a> |
| 1 | <a href="#">2412</a> | 231  | bi  | 1 | <a href="#">2693</a> | bi  | 1 | <a href="#">2172</a> | bi  | 1 | <a href="#">1913</a> | bi  | 1 | <a href="#">2063</a> |

|   |                      |     |     |   |                      |     |   |                      |     |   |                      |     |   |                      |
|---|----------------------|-----|-----|---|----------------------|-----|---|----------------------|-----|---|----------------------|-----|---|----------------------|
| 1 | <a href="#">2413</a> | 325 | bi  | 1 | <a href="#">2694</a> | bi  | 1 | <a href="#">2173</a> | bi  | 1 | <a href="#">1914</a> | bi  | 1 | <a href="#">2064</a> |
| 1 | <a href="#">2414</a> | 182 | bi  | 1 | <a href="#">2695</a> | bi  | 1 | <a href="#">2174</a> | bi  | 1 | <a href="#">1915</a> | bi  | 1 | <a href="#">2065</a> |
| 1 | <a href="#">2415</a> | 324 | bi  | 1 | <a href="#">2696</a> | bi  | 1 | <a href="#">2175</a> | bi  | 1 | <a href="#">1916</a> | bi  | 1 | <a href="#">2066</a> |
| 1 | <a href="#">2416</a> | 348 | bi  | 1 | <a href="#">2697</a> | bi  | 1 | <a href="#">2176</a> | bi  | 1 | <a href="#">1917</a> | bi  | 1 | <a href="#">2067</a> |
| 1 | <a href="#">2417</a> | 276 | bi  | 1 | <a href="#">2698</a> | bi  | 1 | <a href="#">2177</a> | bi  | 1 | <a href="#">1918</a> | bi  | 1 | <a href="#">2068</a> |
| 1 | <a href="#">2418</a> | 623 | bi  | 1 | <a href="#">2699</a> | bi  | 1 | <a href="#">2178</a> | bi  | 1 | <a href="#">1919</a> | bi  | 1 | <a href="#">2069</a> |
| 1 | <a href="#">2419</a> | 576 | bi  | 1 | <a href="#">2700</a> | bi  | 1 | <a href="#">2179</a> | bi  | 1 | <a href="#">1920</a> | bi  | 1 | <a href="#">2070</a> |
| 1 | <a href="#">2420</a> | 226 | bi  | 1 | <a href="#">2701</a> | bi  | 1 | <a href="#">2180</a> | bi  | 1 | <a href="#">1921</a> | bi  | 1 | <a href="#">2071</a> |
| 1 | <a href="#">2421</a> | 190 | bi  | 1 | <a href="#">2702</a> | bi  | 1 | <a href="#">2181</a> | bi  | 1 | <a href="#">1922</a> | bi  | 1 | <a href="#">2072</a> |
| 1 | <a href="#">2422</a> | 482 | bi  | 1 | <a href="#">2703</a> | bi  | 1 | <a href="#">2182</a> | bi  | 1 | <a href="#">1923</a> | bi  | 1 | <a href="#">2073</a> |
| 1 | <a href="#">2423</a> | 627 | bi  | 1 | <a href="#">2704</a> | bi  | 1 | <a href="#">2183</a> | bi  | 1 | <a href="#">1924</a> | bi  | 1 | <a href="#">2074</a> |
| 1 | <a href="#">2424</a> | 281 | bi  | 1 | <a href="#">2705</a> | bi  | 1 | <a href="#">2184</a> | bi  | 1 | <a href="#">1925</a> | bi  | 1 | <a href="#">2075</a> |
| 1 | <a href="#">2425</a> | 209 | bi  | 1 | <a href="#">2706</a> | bi  | 1 | <a href="#">2185</a> | bi  | 1 | <a href="#">1926</a> | bi  | 1 | <a href="#">2076</a> |
| 1 | <a href="#">2426</a> | 390 | bi  | 1 | <a href="#">2707</a> | bi  | 1 | <a href="#">2186</a> | bi  | 1 | <a href="#">1927</a> | bi  | 1 | <a href="#">2077</a> |
| 1 | <a href="#">2427</a> | 127 | bi  | 1 | <a href="#">2708</a> | bi  | 1 | <a href="#">2187</a> | bi  | 1 | <a href="#">1928</a> | bi  | 1 | <a href="#">2078</a> |
| 1 | <a href="#">2428</a> | 59  | bi  | 1 | <a href="#">2709</a> | bi  | 1 | <a href="#">2188</a> | bi  | 1 | <a href="#">1929</a> | bi  | 1 | <a href="#">2079</a> |
| 1 | <a href="#">2429</a> | 434 | bi  | 1 | <a href="#">2710</a> | bi  | 1 | <a href="#">2189</a> | bi  | 1 | <a href="#">1930</a> | bi  | 1 | <a href="#">2080</a> |
| 1 | <a href="#">2430</a> | 79  | bi  | 1 | <a href="#">2711</a> | bi  | 1 | <a href="#">2190</a> | bi  | 1 | <a href="#">1931</a> | bi  | 1 | <a href="#">2081</a> |
| 1 | <a href="#">2431</a> | 140 | bi  | 1 | <a href="#">2712</a> | bi  | 1 | <a href="#">2191</a> | bi  | 1 | <a href="#">1932</a> | bi  | 1 | <a href="#">2082</a> |
| 1 | <a href="#">2432</a> | 469 | bi  | 1 | <a href="#">2713</a> | bi  | 1 | <a href="#">2192</a> | bi  | 1 | <a href="#">1933</a> | bi  | 1 | <a href="#">2083</a> |
| 1 | <a href="#">2433</a> | 303 | bi  | 1 | <a href="#">2714</a> | bi  | 1 | <a href="#">2193</a> | bi  | 1 | <a href="#">1934</a> | bi  | 1 | <a href="#">2084</a> |
| 1 | <a href="#">2434</a> | 519 | bi  | 1 | <a href="#">2715</a> | bi  | 1 | <a href="#">2194</a> | bi  | 1 | <a href="#">1935</a> | bi  | 1 | <a href="#">2085</a> |
| 1 | <a href="#">2435</a> | 181 | bi  | 1 | <a href="#">2716</a> | bi  | 1 | <a href="#">2195</a> | bi  | 1 | <a href="#">1936</a> | bi  | 1 | <a href="#">2086</a> |
| 1 | <a href="#">2436</a> | 177 | bi  | 1 | <a href="#">2717</a> | bi  | 1 | <a href="#">2196</a> | bi  | 1 | <a href="#">1937</a> | bi  | 1 | <a href="#">2087</a> |
| 1 | <a href="#">2437</a> | 74  | bi  | 1 | <a href="#">2718</a> | bi  | 1 | <a href="#">2197</a> | bi  | 1 | <a href="#">1938</a> | bi  | 1 | <a href="#">2088</a> |
| 1 | <a href="#">2438</a> | 240 | bi  | 1 | <a href="#">2719</a> | bi  | 1 | <a href="#">2198</a> | bi  | 1 | <a href="#">1939</a> | bi  | 1 | <a href="#">2089</a> |
| 1 | <a href="#">2439</a> | 34  | -   |   |                      | -   |   |                      | -   |   |                      | -   |   |                      |
| 1 | <a href="#">2440</a> | 155 | bi  | 1 | <a href="#">2720</a> | bi  | 1 | <a href="#">2199</a> | bi  | 1 | <a href="#">1940</a> | bi  | 1 | <a href="#">2090</a> |
| 1 | <a href="#">2441</a> | 790 | bi  | 1 | <a href="#">2721</a> | bi  | 1 | <a href="#">2200</a> | bi  | 1 | <a href="#">1941</a> | bi  | 1 | <a href="#">2091</a> |
| 1 | <a href="#">2442</a> | 255 | bi  | 1 | <a href="#">2722</a> | bi  | 1 | <a href="#">2201</a> | bi  | 1 | <a href="#">1942</a> | bi  | 1 | <a href="#">2092</a> |
| 1 | <a href="#">2443</a> | 33  | -   |   |                      | -   |   |                      | -   |   |                      | -   |   |                      |
| 1 | <a href="#">2444</a> | 79  | bi  | 1 | <a href="#">2723</a> | bi  | 1 | <a href="#">2202</a> | bi  | 1 | <a href="#">1943</a> | bi  | 1 | <a href="#">2093</a> |
| 1 | <a href="#">2445</a> | 92  | bi  | 1 | <a href="#">2724</a> | bi  | 1 | <a href="#">2203</a> | bi  | 1 | <a href="#">1944</a> | bi  | 1 | <a href="#">2094</a> |
| 1 | <a href="#">2446</a> | 95  | bi  | 1 | <a href="#">2725</a> | bi  | 1 | <a href="#">2204</a> | bi  | 1 | <a href="#">1945</a> | bi  | 1 | <a href="#">2095</a> |
| 1 | <a href="#">2447</a> | 602 | bi  | 1 | <a href="#">2726</a> | bi  | 1 | <a href="#">2205</a> | bi  | 1 | <a href="#">1946</a> | bi  | 1 | <a href="#">2096</a> |
| 1 | <a href="#">2448</a> | 32  | -   |   |                      | -   |   |                      | -   |   |                      | -   |   |                      |
| 1 | <a href="#">2449</a> | 276 | bi  | 1 | <a href="#">2727</a> | bi  | 1 | <a href="#">2206</a> | bi  | 1 | <a href="#">1947</a> | bi  | 1 | <a href="#">2097</a> |
| 1 | <a href="#">2450</a> | 495 | bi  | 1 | <a href="#">2728</a> | bi  | 1 | <a href="#">2207</a> | bi  | 1 | <a href="#">1948</a> | bi  | 1 | <a href="#">2098</a> |
| 1 | <a href="#">2451</a> | 137 | bi  | 1 | <a href="#">2729</a> | bi  | 1 | <a href="#">2208</a> | bi  | 1 | <a href="#">1949</a> | bi  | 1 | <a href="#">2099</a> |
| 1 | <a href="#">2452</a> | 516 | bi  | 1 | <a href="#">2730</a> | bi  | 1 | <a href="#">2209</a> | bi  | 1 | <a href="#">1950</a> | bi  | 1 | <a href="#">2100</a> |
| 1 | <a href="#">2453</a> | 237 | bi  | 1 | <a href="#">2731</a> | bi  | 1 | <a href="#">2210</a> | bi  | 1 | <a href="#">1951</a> | bi  | 1 | <a href="#">2101</a> |
| 1 | <a href="#">2454</a> | 175 | uni | 1 | <a href="#">2732</a> | uni | 1 | <a href="#">2211</a> | uni | 1 | <a href="#">1952</a> | uni | 1 | <a href="#">2102</a> |
| 1 | <a href="#">2455</a> | 57  | bi  | 1 | <a href="#">2732</a> | bi  | 1 | <a href="#">2211</a> | bi  | 1 | <a href="#">1952</a> | bi  | 1 | <a href="#">2102</a> |
| 1 | <a href="#">2456</a> | 391 | uni | 1 | <a href="#">2146</a> | -   |   |                      | -   |   |                      | uni | 1 | <a href="#">1007</a> |
| 1 | <a href="#">2457</a> | 542 | bi  | 1 | <a href="#">2733</a> | bi  | 1 | <a href="#">2212</a> | bi  | 1 | <a href="#">1953</a> | bi  | 1 | <a href="#">2103</a> |
| 1 | <a href="#">2458</a> | 95  | bi  | 1 | <a href="#">2734</a> | bi  | 1 | <a href="#">2213</a> | bi  | 1 | <a href="#">1954</a> | bi  | 1 | <a href="#">2104</a> |
| 1 | <a href="#">2459</a> | 59  | bi  | 1 | <a href="#">2735</a> | bi  | 1 | <a href="#">2214</a> | bi  | 1 | <a href="#">1955</a> | bi  | 1 | <a href="#">2105</a> |
| 1 | <a href="#">2460</a> | 218 | bi  | 1 | <a href="#">2736</a> | bi  | 1 | <a href="#">2215</a> | bi  | 1 | <a href="#">1956</a> | bi  | 1 | <a href="#">2106</a> |
| 1 | <a href="#">2461</a> | 217 | bi  | 1 | <a href="#">2737</a> | bi  | 1 | <a href="#">2216</a> | bi  | 1 | <a href="#">1957</a> | bi  | 1 | <a href="#">2107</a> |
| 1 | <a href="#">2462</a> | 649 | bi  | 1 | <a href="#">2738</a> | bi  | 1 | <a href="#">2217</a> | bi  | 1 | <a href="#">1958</a> | bi  | 1 | <a href="#">2108</a> |
| 1 | <a href="#">2463</a> | 211 | bi  | 1 | <a href="#">2739</a> | bi  | 1 | <a href="#">2218</a> | bi  | 1 | <a href="#">1959</a> | bi  | 1 | <a href="#">2109</a> |
| 1 | <a href="#">2464</a> | 403 | bi  | 1 | <a href="#">2740</a> | bi  | 1 | <a href="#">2219</a> | bi  | 1 | <a href="#">1960</a> | bi  | 1 | <a href="#">2110</a> |
| 1 | <a href="#">2465</a> | 570 | bi  | 1 | <a href="#">2741</a> | bi  | 1 | <a href="#">2220</a> | bi  | 1 | <a href="#">1961</a> | bi  | 1 | <a href="#">2113</a> |
| 1 | <a href="#">2466</a> | 237 | bi  | 1 | <a href="#">2742</a> | bi  | 1 | <a href="#">2221</a> | bi  | 1 | <a href="#">1962</a> | bi  | 1 | <a href="#">2114</a> |
| 1 | <a href="#">2467</a> | 301 | bi  | 1 | <a href="#">2743</a> | bi  | 1 | <a href="#">2222</a> | bi  | 1 | <a href="#">1963</a> | bi  | 1 | <a href="#">2115</a> |
| 1 | <a href="#">2468</a> | 338 | bi  | 1 | <a href="#">2744</a> | bi  | 1 | <a href="#">2223</a> | bi  | 1 | <a href="#">1964</a> | bi  | 1 | <a href="#">2116</a> |
| 1 | <a href="#">2469</a> | 383 | bi  | 1 | <a href="#">2745</a> | bi  | 1 | <a href="#">2224</a> | bi  | 1 | <a href="#">1965</a> | bi  | 1 | <a href="#">2117</a> |

|   |                      |      |    |   |                      |    |   |                      |    |   |                      |    |   |                      |
|---|----------------------|------|----|---|----------------------|----|---|----------------------|----|---|----------------------|----|---|----------------------|
| 1 | <a href="#">2470</a> | 431  | bi | 1 | <a href="#">2746</a> | bi | 1 | <a href="#">2225</a> | bi | 1 | <a href="#">1966</a> | bi | 1 | <a href="#">2118</a> |
| 1 | <a href="#">2471</a> | 228  | -  |   |                      | -  |   |                      | -  |   |                      | -  |   |                      |
| 1 | <a href="#">2472</a> | 358  | bi | 1 | <a href="#">2748</a> | bi | 1 | <a href="#">2227</a> | bi | 1 | <a href="#">1968</a> | bi | 1 | <a href="#">2120</a> |
| 1 | <a href="#">2473</a> | 279  | bi | 1 | <a href="#">2749</a> | bi | 1 | <a href="#">2228</a> | bi | 1 | <a href="#">1969</a> | bi | 1 | <a href="#">2121</a> |
| 1 | <a href="#">2474</a> | 269  | bi | 1 | <a href="#">2750</a> | bi | 1 | <a href="#">2229</a> | bi | 1 | <a href="#">1970</a> | bi | 1 | <a href="#">2122</a> |
| 1 | <a href="#">2475</a> | 362  | bi | 1 | <a href="#">2751</a> | bi | 1 | <a href="#">2230</a> | bi | 1 | <a href="#">1971</a> | bi | 1 | <a href="#">2123</a> |
| 1 | <a href="#">2476</a> | 181  | bi | 1 | <a href="#">2752</a> | bi | 1 | <a href="#">2231</a> | bi | 1 | <a href="#">1972</a> | bi | 1 | <a href="#">2124</a> |
| 1 | <a href="#">2477</a> | 331  | bi | 1 | <a href="#">2753</a> | bi | 1 | <a href="#">2232</a> | bi | 1 | <a href="#">1973</a> | bi | 1 | <a href="#">2125</a> |
| 1 | <a href="#">2478</a> | 258  | bi | 1 | <a href="#">2754</a> | bi | 1 | <a href="#">2233</a> | bi | 1 | <a href="#">1974</a> | bi | 1 | <a href="#">2126</a> |
| 1 | <a href="#">2479</a> | 185  | bi | 1 | <a href="#">2755</a> | bi | 1 | <a href="#">2234</a> | bi | 1 | <a href="#">1975</a> | bi | 1 | <a href="#">2127</a> |
| 1 | <a href="#">2480</a> | 212  | bi | 1 | <a href="#">2756</a> | bi | 1 | <a href="#">2235</a> | bi | 1 | <a href="#">1976</a> | bi | 1 | <a href="#">2128</a> |
| 1 | <a href="#">2481</a> | 402  | bi | 1 | <a href="#">2757</a> | bi | 1 | <a href="#">2236</a> | bi | 1 | <a href="#">1977</a> | bi | 1 | <a href="#">2129</a> |
| 1 | <a href="#">2482</a> | 169  | bi | 1 | <a href="#">2758</a> | bi | 1 | <a href="#">2237</a> | bi | 1 | <a href="#">1978</a> | bi | 1 | <a href="#">2130</a> |
| 1 | <a href="#">2483</a> | 320  | bi | 1 | <a href="#">2759</a> | bi | 1 | <a href="#">2238</a> | bi | 1 | <a href="#">1979</a> | bi | 1 | <a href="#">2131</a> |
| 1 | <a href="#">2484</a> | 374  | bi | 1 | <a href="#">283</a>  | -  |   |                      | bi | 1 | <a href="#">2423</a> | -  |   |                      |
| 1 | <a href="#">2485</a> | 866  | bi | 1 | <a href="#">2760</a> | bi | 1 | <a href="#">2239</a> | bi | 1 | <a href="#">1980</a> | bi | 1 | <a href="#">2132</a> |
| 1 | <a href="#">2486</a> | 215  | bi | 1 | <a href="#">2761</a> | bi | 1 | <a href="#">2240</a> | bi | 1 | <a href="#">1981</a> | bi | 1 | <a href="#">2133</a> |
| 1 | <a href="#">2487</a> | 169  | bi | 1 | <a href="#">2762</a> | bi | 1 | <a href="#">2241</a> | bi | 1 | <a href="#">1982</a> | bi | 1 | <a href="#">2134</a> |
| 1 | <a href="#">2488</a> | 282  | bi | 1 | <a href="#">2763</a> | bi | 1 | <a href="#">2242</a> | bi | 1 | <a href="#">1983</a> | bi | 1 | <a href="#">2135</a> |
| 1 | <a href="#">2489</a> | 210  | bi | 1 | <a href="#">2764</a> | bi | 1 | <a href="#">2243</a> | bi | 1 | <a href="#">1984</a> | bi | 1 | <a href="#">2136</a> |
| 1 | <a href="#">2490</a> | 454  | bi | 1 | <a href="#">2765</a> | bi | 1 | <a href="#">2244</a> | bi | 1 | <a href="#">1985</a> | bi | 1 | <a href="#">2137</a> |
| 1 | <a href="#">3346</a> | 298  | bi | 1 | <a href="#">2766</a> | bi | 1 | <a href="#">2245</a> | bi | 1 | <a href="#">1986</a> | bi | 1 | <a href="#">2138</a> |
| 1 | <a href="#">2491</a> | 266  | bi | 1 | <a href="#">2767</a> | bi | 1 | <a href="#">2246</a> | bi | 1 | <a href="#">1987</a> | bi | 1 | <a href="#">2139</a> |
| 1 | <a href="#">2492</a> | 235  | bi | 1 | <a href="#">2768</a> | bi | 1 | <a href="#">2247</a> | bi | 1 | <a href="#">1988</a> | bi | 1 | <a href="#">2140</a> |
| 1 | <a href="#">2493</a> | 193  | bi | 1 | <a href="#">2769</a> | bi | 1 | <a href="#">2248</a> | bi | 1 | <a href="#">1989</a> | bi | 1 | <a href="#">2141</a> |
| 1 | <a href="#">2494</a> | 220  | bi | 1 | <a href="#">2770</a> | bi | 1 | <a href="#">2249</a> | bi | 1 | <a href="#">1990</a> | bi | 1 | <a href="#">2142</a> |
| 1 | <a href="#">2495</a> | 604  | bi | 1 | <a href="#">2772</a> | bi | 1 | <a href="#">2251</a> | bi | 1 | <a href="#">1991</a> | bi | 1 | <a href="#">2144</a> |
| 1 | <a href="#">2496</a> | 393  | bi | 1 | <a href="#">2773</a> | bi | 1 | <a href="#">2252</a> | bi | 1 | <a href="#">1992</a> | bi | 1 | <a href="#">2145</a> |
| 1 | <a href="#">2497</a> | 221  | bi | 1 | <a href="#">2774</a> | bi | 1 | <a href="#">2253</a> | bi | 1 | <a href="#">1993</a> | bi | 1 | <a href="#">2146</a> |
| 1 | <a href="#">2498</a> | 133  | bi | 1 | <a href="#">2775</a> | bi | 1 | <a href="#">2254</a> | bi | 1 | <a href="#">1994</a> | bi | 1 | <a href="#">2148</a> |
| 1 | <a href="#">2499</a> | 337  | bi | 1 | <a href="#">2776</a> | bi | 1 | <a href="#">2255</a> | bi | 1 | <a href="#">1995</a> | bi | 1 | <a href="#">2149</a> |
| 1 | <a href="#">2500</a> | 572  | bi | 1 | <a href="#">2777</a> | bi | 1 | <a href="#">2256</a> | bi | 1 | <a href="#">1996</a> | bi | 1 | <a href="#">2150</a> |
| 1 | <a href="#">2501</a> | 238  | bi | 1 | <a href="#">2778</a> | bi | 1 | <a href="#">2320</a> | bi | 1 | <a href="#">1997</a> | bi | 1 | <a href="#">2151</a> |
| 1 | <a href="#">2502</a> | 342  | bi | 1 | <a href="#">2779</a> | bi | 1 | <a href="#">2323</a> | bi | 1 | <a href="#">1998</a> | bi | 1 | <a href="#">2152</a> |
| 1 | <a href="#">2503</a> | 259  | bi | 1 | <a href="#">2780</a> | bi | 1 | <a href="#">2324</a> | bi | 1 | <a href="#">1999</a> | bi | 1 | <a href="#">2153</a> |
| 1 | <a href="#">2504</a> | 261  | bi | 1 | <a href="#">2781</a> | bi | 1 | <a href="#">2325</a> | bi | 1 | <a href="#">2000</a> | bi | 1 | <a href="#">2154</a> |
| 1 | <a href="#">2505</a> | 123  | bi | 1 | <a href="#">2782</a> | bi | 1 | <a href="#">2326</a> | bi | 1 | <a href="#">2001</a> | bi | 1 | <a href="#">2155</a> |
| 1 | <a href="#">3347</a> | 724  | bi | 1 | <a href="#">2783</a> | bi | 1 | <a href="#">2327</a> | bi | 1 | <a href="#">2002</a> | bi | 1 | <a href="#">2156</a> |
| 1 | <a href="#">2506</a> | 308  | bi | 1 | <a href="#">2784</a> | bi | 1 | <a href="#">2328</a> | bi | 1 | <a href="#">2003</a> | bi | 1 | <a href="#">2157</a> |
| 1 | <a href="#">2507</a> | 1066 | bi | 1 | <a href="#">2785</a> | bi | 1 | <a href="#">2329</a> | bi | 1 | <a href="#">2004</a> | bi | 1 | <a href="#">2158</a> |
| 1 | <a href="#">2508</a> | 1046 | bi | 1 | <a href="#">2786</a> | bi | 1 | <a href="#">2330</a> | bi | 1 | <a href="#">2005</a> | bi | 1 | <a href="#">2159</a> |
| 1 | <a href="#">2509</a> | 379  | bi | 1 | <a href="#">2787</a> | bi | 1 | <a href="#">2331</a> | bi | 1 | <a href="#">2006</a> | bi | 1 | <a href="#">2160</a> |
| 1 | <a href="#">2510</a> | 209  | bi | 1 | <a href="#">2788</a> | bi | 1 | <a href="#">2332</a> | bi | 1 | <a href="#">2007</a> | bi | 1 | <a href="#">2161</a> |
| 1 | <a href="#">2511</a> | 245  | bi | 1 | <a href="#">2789</a> | bi | 1 | <a href="#">2333</a> | bi | 1 | <a href="#">2008</a> | bi | 1 | <a href="#">2162</a> |
| 1 | <a href="#">2512</a> | 89   | bi | 1 | <a href="#">2790</a> | bi | 1 | <a href="#">2334</a> | bi | 1 | <a href="#">2009</a> | bi | 1 | <a href="#">2163</a> |
| 1 | <a href="#">2513</a> | 232  | bi | 1 | <a href="#">2791</a> | bi | 1 | <a href="#">2335</a> | bi | 1 | <a href="#">2010</a> | bi | 1 | <a href="#">2164</a> |
| 1 | <a href="#">2514</a> | 99   | bi | 1 | <a href="#">2792</a> | bi | 1 | <a href="#">2336</a> | bi | 1 | <a href="#">2011</a> | bi | 1 | <a href="#">2165</a> |
| 1 | <a href="#">2515</a> | 199  | bi | 1 | <a href="#">2793</a> | bi | 1 | <a href="#">2337</a> | bi | 1 | <a href="#">2012</a> | bi | 1 | <a href="#">2166</a> |
| 1 | <a href="#">2516</a> | 227  | bi | 1 | <a href="#">2794</a> | bi | 1 | <a href="#">2338</a> | bi | 1 | <a href="#">2013</a> | bi | 1 | <a href="#">2167</a> |
| 1 | <a href="#">2517</a> | 396  | bi | 1 | <a href="#">2795</a> | bi | 1 | <a href="#">2339</a> | bi | 1 | <a href="#">2014</a> | bi | 1 | <a href="#">2168</a> |
| 1 | <a href="#">2518</a> | 32   | -  |   |                      | -  |   |                      | -  |   |                      | -  |   |                      |
| 1 | <a href="#">2519</a> | 274  | bi | 1 | <a href="#">2796</a> | bi | 1 | <a href="#">2340</a> | bi | 1 | <a href="#">2015</a> | bi | 1 | <a href="#">2169</a> |
| 1 | <a href="#">2520</a> | 175  | bi | 1 | <a href="#">2797</a> | bi | 1 | <a href="#">2341</a> | bi | 1 | <a href="#">2016</a> | bi | 1 | <a href="#">2170</a> |
| 1 | <a href="#">2521</a> | 144  | bi | 1 | <a href="#">2798</a> | bi | 1 | <a href="#">2342</a> | bi | 1 | <a href="#">2017</a> | bi | 1 | <a href="#">2171</a> |
| 1 | <a href="#">2522</a> | 375  | bi | 1 | <a href="#">2799</a> | bi | 1 | <a href="#">2343</a> | bi | 1 | <a href="#">2018</a> | bi | 1 | <a href="#">2172</a> |
| 1 | <a href="#">2523</a> | 395  | bi | 1 | <a href="#">2800</a> | bi | 1 | <a href="#">2344</a> | bi | 1 | <a href="#">2019</a> | bi | 1 | <a href="#">2173</a> |
| 1 | <a href="#">2524</a> | 267  | bi | 1 | <a href="#">2801</a> | bi | 1 | <a href="#">2345</a> | bi | 1 | <a href="#">2020</a> | bi | 1 | <a href="#">2174</a> |

|   |                      |      |    |   |                      |    |   |                      |    |   |                      |    |   |                      |
|---|----------------------|------|----|---|----------------------|----|---|----------------------|----|---|----------------------|----|---|----------------------|
| 1 | <a href="#">2525</a> | 457  | bi | 1 | <a href="#">2802</a> | bi | 1 | <a href="#">2346</a> | bi | 1 | <a href="#">2021</a> | bi | 1 | <a href="#">2175</a> |
| 1 | <a href="#">2526</a> | 46   | -  |   |                      | -  |   |                      | bi | 1 | <a href="#">1610</a> | -  |   |                      |
| 1 | <a href="#">2527</a> | 83   | bi | 1 | <a href="#">2803</a> | bi | 1 | <a href="#">2347</a> | bi | 1 | <a href="#">2022</a> | bi | 1 | <a href="#">2176</a> |
| 1 | <a href="#">2528</a> | 1026 | bi | 1 | <a href="#">2804</a> | bi | 1 | <a href="#">2348</a> | bi | 1 | <a href="#">2023</a> | bi | 1 | <a href="#">2177</a> |
| 1 | <a href="#">2529</a> | 500  | bi | 1 | <a href="#">2805</a> | bi | 1 | <a href="#">2349</a> | bi | 1 | <a href="#">2024</a> | bi | 1 | <a href="#">2178</a> |
| 1 | <a href="#">2530</a> | 277  | bi | 1 | <a href="#">2806</a> | bi | 1 | <a href="#">2350</a> | bi | 1 | <a href="#">2025</a> | bi | 1 | <a href="#">2179</a> |
| 1 | <a href="#">2531</a> | 33   | -  |   |                      | -  |   |                      | -  |   |                      | -  |   |                      |
| 1 | <a href="#">2532</a> | 256  | -  |   |                      | -  |   |                      | -  |   |                      | -  |   |                      |
| 1 | <a href="#">2533</a> | 123  | bi | 1 | <a href="#">2808</a> | bi | 1 | <a href="#">2352</a> | bi | 1 | <a href="#">2027</a> | bi | 1 | <a href="#">2181</a> |
| 1 | <a href="#">2534</a> | 167  | bi | 1 | <a href="#">2809</a> | bi | 1 | <a href="#">2353</a> | bi | 1 | <a href="#">2028</a> | bi | 1 | <a href="#">2182</a> |
| 1 | <a href="#">2535</a> | 230  | bi | 1 | <a href="#">2810</a> | bi | 1 | <a href="#">2355</a> | bi | 1 | <a href="#">2029</a> | bi | 1 | <a href="#">2183</a> |
| 1 | <a href="#">2536</a> | 141  | bi | 1 | <a href="#">2811</a> | bi | 1 | <a href="#">2356</a> | bi | 1 | <a href="#">2030</a> | bi | 1 | <a href="#">2184</a> |
| 1 | <a href="#">2537</a> | 499  | bi | 1 | <a href="#">2812</a> | bi | 1 | <a href="#">2357</a> | bi | 1 | <a href="#">2031</a> | bi | 1 | <a href="#">2185</a> |
| 1 | <a href="#">2538</a> | 223  | bi | 1 | <a href="#">2813</a> | bi | 1 | <a href="#">2358</a> | bi | 1 | <a href="#">2032</a> | bi | 1 | <a href="#">2186</a> |
| 1 | <a href="#">2539</a> | 291  | bi | 1 | <a href="#">2814</a> | bi | 1 | <a href="#">2359</a> | bi | 1 | <a href="#">2033</a> | bi | 1 | <a href="#">2187</a> |
| 1 | <a href="#">2540</a> | 282  | bi | 1 | <a href="#">2815</a> | bi | 1 | <a href="#">2360</a> | bi | 1 | <a href="#">2034</a> | bi | 1 | <a href="#">2188</a> |
| 1 | <a href="#">2541</a> | 368  | bi | 1 | <a href="#">2816</a> | bi | 1 | <a href="#">2361</a> | bi | 1 | <a href="#">2035</a> | bi | 1 | <a href="#">2189</a> |
| 1 | <a href="#">2542</a> | 543  | bi | 1 | <a href="#">2817</a> | bi | 1 | <a href="#">2362</a> | bi | 1 | <a href="#">2036</a> | bi | 1 | <a href="#">2190</a> |
| 1 | <a href="#">2543</a> | 241  | bi | 1 | <a href="#">2818</a> | bi | 1 | <a href="#">2363</a> | bi | 1 | <a href="#">2037</a> | bi | 1 | <a href="#">2191</a> |
| 1 | <a href="#">2544</a> | 293  | bi | 1 | <a href="#">2819</a> | bi | 1 | <a href="#">2364</a> | bi | 1 | <a href="#">2038</a> | bi | 1 | <a href="#">2192</a> |
| 1 | <a href="#">2545</a> | 182  | bi | 1 | <a href="#">2820</a> | bi | 1 | <a href="#">2365</a> | bi | 1 | <a href="#">2039</a> | bi | 1 | <a href="#">2193</a> |
| 1 | <a href="#">2546</a> | 57   | bi | 1 | <a href="#">2821</a> | bi | 1 | <a href="#">2366</a> | bi | 1 | <a href="#">2040</a> | bi | 1 | <a href="#">2194</a> |
| 1 | <a href="#">2547</a> | 51   | bi | 1 | <a href="#">2822</a> | bi | 1 | <a href="#">2367</a> | bi | 1 | <a href="#">2041</a> | bi | 1 | <a href="#">2195</a> |
| 1 | <a href="#">2548</a> | 213  | bi | 1 | <a href="#">2823</a> | bi | 1 | <a href="#">2368</a> | bi | 1 | <a href="#">2042</a> | bi | 1 | <a href="#">2196</a> |
| 1 | <a href="#">2549</a> | 301  | bi | 1 | <a href="#">2825</a> | bi | 1 | <a href="#">2370</a> | bi | 1 | <a href="#">2044</a> | bi | 1 | <a href="#">2198</a> |
| 1 | <a href="#">2550</a> | 305  | bi | 1 | <a href="#">2826</a> | bi | 1 | <a href="#">2371</a> | bi | 1 | <a href="#">2045</a> | bi | 1 | <a href="#">2199</a> |
| 1 | <a href="#">2551</a> | 252  | bi | 1 | <a href="#">2827</a> | bi | 1 | <a href="#">2372</a> | bi | 1 | <a href="#">2046</a> | bi | 1 | <a href="#">2200</a> |
| 1 | <a href="#">2552</a> | 178  | bi | 1 | <a href="#">2828</a> | bi | 1 | <a href="#">2373</a> | bi | 1 | <a href="#">2047</a> | bi | 1 | <a href="#">2201</a> |
| 1 | <a href="#">2553</a> | 561  | bi | 1 | <a href="#">2830</a> | bi | 1 | <a href="#">2375</a> | bi | 1 | <a href="#">2049</a> | bi | 1 | <a href="#">2203</a> |
| 1 | <a href="#">2554</a> | 188  | bi | 1 | <a href="#">2831</a> | bi | 1 | <a href="#">2376</a> | bi | 1 | <a href="#">2050</a> | bi | 1 | <a href="#">2204</a> |
| 1 | <a href="#">2555</a> | 230  | bi | 1 | <a href="#">2832</a> | bi | 1 | <a href="#">2377</a> | bi | 1 | <a href="#">2051</a> | bi | 1 | <a href="#">2205</a> |
| 1 | <a href="#">2556</a> | 335  | bi | 1 | <a href="#">2833</a> | bi | 1 | <a href="#">2378</a> | bi | 1 | <a href="#">2052</a> | bi | 1 | <a href="#">2206</a> |
| 1 | <a href="#">2557</a> | 247  | bi | 1 | <a href="#">2834</a> | bi | 1 | <a href="#">2379</a> | bi | 1 | <a href="#">2053</a> | bi | 1 | <a href="#">2207</a> |
| 1 | <a href="#">2558</a> | 264  | bi | 1 | <a href="#">2835</a> | bi | 1 | <a href="#">2380</a> | bi | 1 | <a href="#">2054</a> | bi | 1 | <a href="#">2208</a> |
| 1 | <a href="#">2559</a> | 354  | bi | 1 | <a href="#">2836</a> | bi | 1 | <a href="#">2381</a> | bi | 1 | <a href="#">2055</a> | bi | 1 | <a href="#">2209</a> |
| 1 | <a href="#">2560</a> | 425  | bi | 1 | <a href="#">2837</a> | bi | 1 | <a href="#">2382</a> | bi | 1 | <a href="#">2056</a> | bi | 1 | <a href="#">2210</a> |
| 1 | <a href="#">2561</a> | 79   | bi | 1 | <a href="#">2838</a> | bi | 1 | <a href="#">2383</a> | bi | 1 | <a href="#">2057</a> | bi | 1 | <a href="#">2211</a> |
| 1 | <a href="#">2562</a> | 401  | bi | 1 | <a href="#">2839</a> | bi | 1 | <a href="#">2384</a> | bi | 1 | <a href="#">2058</a> | bi | 1 | <a href="#">2212</a> |
| 1 | <a href="#">2563</a> | 507  | bi | 1 | <a href="#">2840</a> | bi | 1 | <a href="#">2385</a> | bi | 1 | <a href="#">2059</a> | bi | 1 | <a href="#">2213</a> |
| 1 | <a href="#">2564</a> | 50   | bi | 1 | <a href="#">2841</a> | bi | 1 | <a href="#">2386</a> | -  |   |                      | bi | 1 | <a href="#">2214</a> |
| 1 | <a href="#">2565</a> | 699  | bi | 1 | <a href="#">2842</a> | bi | 1 | <a href="#">2387</a> | bi | 1 | <a href="#">2060</a> | bi | 1 | <a href="#">2215</a> |
| 1 | <a href="#">2566</a> | 256  | bi | 1 | <a href="#">2843</a> | bi | 1 | <a href="#">2388</a> | bi | 1 | <a href="#">2061</a> | bi | 1 | <a href="#">2216</a> |
| 1 | <a href="#">2567</a> | 728  | bi | 1 | <a href="#">2845</a> | bi | 1 | <a href="#">2390</a> | bi | 1 | <a href="#">2063</a> | bi | 1 | <a href="#">2218</a> |
| 1 | <a href="#">2568</a> | 199  | bi | 1 | <a href="#">2846</a> | bi | 1 | <a href="#">2391</a> | bi | 1 | <a href="#">2064</a> | bi | 1 | <a href="#">2219</a> |
| 1 | <a href="#">2569</a> | 373  | bi | 1 | <a href="#">2847</a> | bi | 1 | <a href="#">2392</a> | bi | 1 | <a href="#">2065</a> | bi | 1 | <a href="#">2220</a> |
| 1 | <a href="#">2570</a> | 253  | bi | 1 | <a href="#">2848</a> | bi | 1 | <a href="#">2393</a> | bi | 1 | <a href="#">2066</a> | bi | 1 | <a href="#">2221</a> |
| 1 | <a href="#">2571</a> | 221  | bi | 1 | <a href="#">2849</a> | bi | 1 | <a href="#">2394</a> | bi | 1 | <a href="#">2067</a> | bi | 1 | <a href="#">2222</a> |
| 1 | <a href="#">2572</a> | 291  | bi | 1 | <a href="#">2850</a> | bi | 1 | <a href="#">2395</a> | bi | 1 | <a href="#">2068</a> | bi | 1 | <a href="#">2223</a> |
| 1 | <a href="#">2573</a> | 116  | bi | 1 | <a href="#">2851</a> | bi | 1 | <a href="#">2396</a> | bi | 1 | <a href="#">2069</a> | bi | 1 | <a href="#">2224</a> |
| 1 | <a href="#">2574</a> | 280  | bi | 1 | <a href="#">2852</a> | bi | 1 | <a href="#">2397</a> | bi | 1 | <a href="#">2070</a> | bi | 1 | <a href="#">2225</a> |
| 1 | <a href="#">2575</a> | 317  | bi | 1 | <a href="#">2853</a> | bi | 1 | <a href="#">2398</a> | bi | 1 | <a href="#">2071</a> | bi | 1 | <a href="#">2226</a> |
| 1 | <a href="#">2576</a> | 110  | bi | 1 | <a href="#">2854</a> | bi | 1 | <a href="#">2399</a> | bi | 1 | <a href="#">2072</a> | bi | 1 | <a href="#">2227</a> |
| 1 | <a href="#">2577</a> | 213  | bi | 1 | <a href="#">2855</a> | bi | 1 | <a href="#">2400</a> | bi | 1 | <a href="#">2073</a> | bi | 1 | <a href="#">2228</a> |
| 1 | <a href="#">2578</a> | 39   | bi | 1 | <a href="#">2856</a> | bi | 1 | <a href="#">2401</a> | -  |   |                      | bi | 1 | <a href="#">2229</a> |
| 1 | <a href="#">2579</a> | 199  | bi | 1 | <a href="#">2857</a> | bi | 1 | <a href="#">2402</a> | bi | 1 | <a href="#">2074</a> | bi | 1 | <a href="#">2230</a> |
| 1 | <a href="#">2580</a> | 221  | bi | 1 | <a href="#">2858</a> | bi | 1 | <a href="#">2403</a> | bi | 1 | <a href="#">2075</a> | bi | 1 | <a href="#">2231</a> |
| 1 | <a href="#">2581</a> | 218  | bi | 1 | <a href="#">2859</a> | bi | 1 | <a href="#">2404</a> | bi | 1 | <a href="#">2076</a> | bi | 1 | <a href="#">2232</a> |



|   |                      |     |     |   |                      |     |   |                      |     |   |                      |     |   |                      |
|---|----------------------|-----|-----|---|----------------------|-----|---|----------------------|-----|---|----------------------|-----|---|----------------------|
| 1 | <a href="#">2582</a> | 453 | bi  | 1 | <a href="#">2860</a> | bi  | 1 | <a href="#">2405</a> | bi  | 1 | <a href="#">2077</a> | bi  | 1 | <a href="#">2233</a> |
| 1 | <a href="#">2583</a> | 188 | bi  | 1 | <a href="#">2861</a> | bi  | 1 | <a href="#">2406</a> | bi  | 1 | <a href="#">2078</a> | bi  | 1 | <a href="#">2234</a> |
| 1 | <a href="#">2584</a> | 262 | bi  | 1 | <a href="#">2862</a> | bi  | 1 | <a href="#">2407</a> | bi  | 1 | <a href="#">2079</a> | bi  | 1 | <a href="#">2235</a> |
| 1 | <a href="#">3348</a> | 314 | bi  | 1 | <a href="#">2863</a> | bi  | 1 | <a href="#">2408</a> | bi  | 1 | <a href="#">2080</a> | bi  | 1 | <a href="#">2236</a> |
| 1 | <a href="#">2585</a> | 397 | bi  | 1 | <a href="#">2864</a> | bi  | 1 | <a href="#">2409</a> | bi  | 1 | <a href="#">2081</a> | bi  | 1 | <a href="#">2237</a> |
| 1 | <a href="#">2586</a> | 119 | bi  | 1 | <a href="#">2865</a> | bi  | 1 | <a href="#">2410</a> | bi  | 1 | <a href="#">2082</a> | bi  | 1 | <a href="#">2238</a> |
| 1 | <a href="#">2587</a> | 277 | bi  | 1 | <a href="#">2866</a> | bi  | 1 | <a href="#">2411</a> | bi  | 1 | <a href="#">2083</a> | bi  | 1 | <a href="#">2239</a> |
| 1 | <a href="#">2588</a> | 212 | bi  | 1 | <a href="#">2867</a> | bi  | 1 | <a href="#">2412</a> | bi  | 1 | <a href="#">2084</a> | bi  | 1 | <a href="#">2240</a> |
| 1 | <a href="#">2589</a> | 273 | bi  | 1 | <a href="#">2868</a> | bi  | 1 | <a href="#">2413</a> | bi  | 1 | <a href="#">2085</a> | bi  | 1 | <a href="#">2241</a> |
| 1 | <a href="#">2590</a> | 177 | bi  | 1 | <a href="#">2869</a> | bi  | 1 | <a href="#">2414</a> | bi  | 1 | <a href="#">2086</a> | bi  | 1 | <a href="#">2242</a> |
| 1 | <a href="#">2591</a> | 105 | bi  | 1 | <a href="#">2871</a> | bi  | 1 | <a href="#">2416</a> | bi  | 1 | <a href="#">2087</a> | bi  | 1 | <a href="#">2243</a> |
| 1 | <a href="#">2592</a> | 587 | bi  | 1 | <a href="#">2872</a> | bi  | 1 | <a href="#">2417</a> | bi  | 1 | <a href="#">2088</a> | bi  | 1 | <a href="#">2244</a> |
| 1 | <a href="#">2593</a> | 405 | bi  | 1 | <a href="#">2873</a> | bi  | 1 | <a href="#">2418</a> | bi  | 1 | <a href="#">2089</a> | bi  | 1 | <a href="#">2245</a> |
| 1 | <a href="#">2594</a> | 331 | bi  | 1 | <a href="#">2874</a> | bi  | 1 | <a href="#">2419</a> | bi  | 1 | <a href="#">2090</a> | bi  | 1 | <a href="#">2246</a> |
| 1 | <a href="#">2595</a> | 56  | bi  | 1 | <a href="#">2875</a> | bi  | 1 | <a href="#">2420</a> | bi  | 1 | <a href="#">2091</a> | bi  | 1 | <a href="#">2247</a> |
| 1 | <a href="#">2596</a> | 613 | bi  | 1 | <a href="#">2876</a> | bi  | 1 | <a href="#">2421</a> | bi  | 1 | <a href="#">2092</a> | bi  | 1 | <a href="#">2248</a> |
| 1 | <a href="#">2597</a> | 117 | bi  | 1 | <a href="#">2877</a> | bi  | 1 | <a href="#">2422</a> | bi  | 1 | <a href="#">2093</a> | bi  | 1 | <a href="#">2249</a> |
| 1 | <a href="#">2598</a> | 133 | bi  | 1 | <a href="#">2878</a> | bi  | 1 | <a href="#">2423</a> | bi  | 1 | <a href="#">2094</a> | bi  | 1 | <a href="#">2250</a> |
| 1 | <a href="#">2599</a> | 324 | bi  | 1 | <a href="#">2879</a> | bi  | 1 | <a href="#">2424</a> | bi  | 1 | <a href="#">2095</a> | bi  | 1 | <a href="#">2251</a> |
| 1 | <a href="#">2600</a> | 73  | bi  | 1 | <a href="#">2880</a> | bi  | 1 | <a href="#">2425</a> | bi  | 1 | <a href="#">2096</a> | bi  | 1 | <a href="#">2252</a> |
| 1 | <a href="#">2601</a> | 237 | bi  | 1 | <a href="#">2881</a> | bi  | 1 | <a href="#">2426</a> | bi  | 1 | <a href="#">2097</a> | bi  | 1 | <a href="#">2253</a> |
| 1 | <a href="#">2602</a> | 181 | bi  | 1 | <a href="#">2882</a> | bi  | 1 | <a href="#">2427</a> | bi  | 1 | <a href="#">2098</a> | bi  | 1 | <a href="#">2254</a> |
| 1 | <a href="#">2603</a> | 257 | bi  | 1 | <a href="#">2883</a> | bi  | 1 | <a href="#">2428</a> | bi  | 1 | <a href="#">2099</a> | bi  | 1 | <a href="#">2255</a> |
| 1 | <a href="#">2604</a> | 192 | bi  | 1 | <a href="#">2884</a> | bi  | 1 | <a href="#">2429</a> | bi  | 1 | <a href="#">2100</a> | bi  | 1 | <a href="#">2256</a> |
| 1 | <a href="#">2605</a> | 517 | bi  | 1 | <a href="#">2885</a> | bi  | 1 | <a href="#">2430</a> | bi  | 1 | <a href="#">2101</a> | bi  | 1 | <a href="#">2258</a> |
| 1 | <a href="#">2606</a> | 355 | bi  | 1 | <a href="#">2886</a> | bi  | 1 | <a href="#">2431</a> | bi  | 1 | <a href="#">2102</a> | bi  | 1 | <a href="#">2259</a> |
| 1 | <a href="#">2607</a> | 355 | bi  | 1 | <a href="#">2887</a> | bi  | 1 | <a href="#">2432</a> | bi  | 1 | <a href="#">2103</a> | bi  | 1 | <a href="#">2260</a> |
| 1 | <a href="#">2608</a> | 66  | bi  | 1 | <a href="#">2888</a> | bi  | 1 | <a href="#">2433</a> | bi  | 1 | <a href="#">2104</a> | bi  | 1 | <a href="#">2261</a> |
| 1 | <a href="#">2609</a> | 135 | -   |   |                      | -   |   |                      | -   |   |                      | -   |   |                      |
| 1 | <a href="#">2610</a> | 393 | uni | 1 | <a href="#">1025</a> | -   |   |                      | -   |   |                      | uni | 1 | <a href="#">424</a>  |
| 1 | <a href="#">2611</a> | 264 | -   |   |                      | -   |   |                      | -   |   |                      | -   |   |                      |
| 1 | <a href="#">2612</a> | 434 | uni | 1 | <a href="#">2296</a> | uni | 1 | <a href="#">2434</a> | uni | 1 | <a href="#">518</a>  | bi  | 1 | <a href="#">1806</a> |
| 1 | <a href="#">2613</a> | 69  | -   |   |                      | bi  | 1 | <a href="#">2435</a> | -   |   |                      | bi  | 1 | <a href="#">2336</a> |
| 1 | <a href="#">2614</a> | 78  | -   |   |                      | uni | 1 | <a href="#">294</a>  | -   |   |                      | bi  | 1 | <a href="#">2337</a> |
| 1 | <a href="#">2615</a> | 46  | uni | 1 | <a href="#">1365</a> | bi  | 1 | <a href="#">1659</a> | -   |   |                      | uni | 1 | <a href="#">2338</a> |
| 1 | <a href="#">2616</a> | 125 | -   |   |                      | bi  | 1 | <a href="#">1660</a> | -   |   |                      | -   |   |                      |
| 1 | <a href="#">2617</a> | 184 | -   |   |                      | bi  | 1 | <a href="#">1661</a> | -   |   |                      | -   |   |                      |
| 1 | <a href="#">3349</a> | 106 | uni | 1 | <a href="#">2302</a> | uni | 1 | <a href="#">1662</a> | -   |   |                      | bi  | 1 | <a href="#">2341</a> |
| 1 | <a href="#">3350</a> | 106 | uni | 1 | <a href="#">2303</a> | uni | 1 | <a href="#">1663</a> | -   |   |                      | bi  | 1 | <a href="#">2342</a> |
| 1 | <a href="#">2618</a> | 303 | uni | 1 | <a href="#">2304</a> | uni | 1 | <a href="#">1664</a> | -   |   |                      | bi  | 1 | <a href="#">2343</a> |
| 1 | <a href="#">2619</a> | 932 | uni | 1 | <a href="#">2305</a> | uni | 1 | <a href="#">1665</a> | -   |   |                      | bi  | 1 | <a href="#">2344</a> |
| 1 | <a href="#">2620</a> | 235 | -   |   |                      | bi  | 1 | <a href="#">2444</a> | -   |   |                      | bi  | 1 | <a href="#">2345</a> |
| 1 | <a href="#">2621</a> | 768 | -   |   |                      | bi  | 1 | <a href="#">2445</a> | -   |   |                      | bi  | 1 | <a href="#">2346</a> |
| 1 | <a href="#">2622</a> | 152 | -   |   |                      | bi  | 1 | <a href="#">2446</a> | -   |   |                      | bi  | 1 | <a href="#">2347</a> |
| 1 | <a href="#">2623</a> | 215 | -   |   |                      | bi  | 1 | <a href="#">2447</a> | -   |   |                      | bi  | 1 | <a href="#">2348</a> |
| 1 | <a href="#">2624</a> | 121 | -   |   |                      | bi  | 1 | <a href="#">2448</a> | -   |   |                      | bi  | 1 | <a href="#">2349</a> |
| 1 | <a href="#">2625</a> | 113 | -   |   |                      | bi  | 1 | <a href="#">2449</a> | -   |   |                      | bi  | 1 | <a href="#">2350</a> |
| 1 | <a href="#">2626</a> | 109 | -   |   |                      | bi  | 1 | <a href="#">2450</a> | -   |   |                      | bi  | 1 | <a href="#">2351</a> |
| 1 | <a href="#">2627</a> | 94  | -   |   |                      | bi  | 1 | <a href="#">2451</a> | -   |   |                      | bi  | 1 | <a href="#">2352</a> |
| 1 | <a href="#">2628</a> | 455 | -   |   |                      | bi  | 1 | <a href="#">2452</a> | -   |   |                      | bi  | 1 | <a href="#">2353</a> |
| 1 | <a href="#">2629</a> | 191 | -   |   |                      | bi  | 1 | <a href="#">2453</a> | -   |   |                      | bi  | 1 | <a href="#">2354</a> |
| 1 | <a href="#">2630</a> | 409 | -   |   |                      | bi  | 1 | <a href="#">2454</a> | -   |   |                      | bi  | 1 | <a href="#">2355</a> |
| 1 | <a href="#">2631</a> | 576 | -   |   |                      | bi  | 1 | <a href="#">2455</a> | -   |   |                      | bi  | 1 | <a href="#">2356</a> |
| 1 | <a href="#">2632</a> | 151 | -   |   |                      | bi  | 1 | <a href="#">2456</a> | -   |   |                      | bi  | 1 | <a href="#">2357</a> |
| 1 | <a href="#">2633</a> | 125 | -   |   |                      | bi  | 1 | <a href="#">2457</a> | -   |   |                      | -   |   |                      |
| 1 | <a href="#">2634</a> | 136 | -   |   |                      | bi  | 1 | <a href="#">2459</a> | -   |   |                      | bi  | 1 | <a href="#">2358</a> |
| 1 | <a href="#">2635</a> | 156 | -   |   |                      | bi  | 1 | <a href="#">2461</a> | -   |   |                      | bi  | 1 | <a href="#">2359</a> |

|   |                      |     |     |   |                      |     |   |                      |     |   |                      |     |   |                      |
|---|----------------------|-----|-----|---|----------------------|-----|---|----------------------|-----|---|----------------------|-----|---|----------------------|
| 1 | <a href="#">2636</a> | 78  | -   |   |                      | -   |   |                      | -   |   |                      | uni | 1 | <a href="#">1517</a> |
| 1 | <a href="#">2637</a> | 61  | -   |   |                      | bi  | 3 | <a href="#">2957</a> | -   |   |                      | bi  | 1 | <a href="#">1840</a> |
| 1 | <a href="#">2638</a> | 40  | -   |   |                      | -   |   |                      | -   |   |                      | -   |   |                      |
| 1 | <a href="#">2639</a> | 33  | -   |   |                      | -   |   |                      | -   |   |                      | -   |   |                      |
| 1 | <a href="#">2640</a> | 273 | -   |   |                      | -   |   |                      | -   |   |                      | -   |   |                      |
| 1 | <a href="#">2641</a> | 69  | -   |   |                      | bi  | 1 | <a href="#">2468</a> | -   |   |                      | bi  | 1 | <a href="#">2364</a> |
| 1 | <a href="#">2642</a> | 201 | -   |   |                      | bi  | 1 | <a href="#">2469</a> | -   |   |                      | bi  | 1 | <a href="#">2365</a> |
| 1 | <a href="#">2643</a> | 157 | -   |   |                      | bi  | 1 | <a href="#">2470</a> | -   |   |                      | bi  | 1 | <a href="#">2366</a> |
| 1 | <a href="#">2644</a> | 90  | -   |   |                      | bi  | 1 | <a href="#">2471</a> | -   |   |                      | uni | 1 | <a href="#">1526</a> |
| 1 | <a href="#">2645</a> | 284 | uni | 1 | <a href="#">1668</a> | bi  | 1 | <a href="#">2472</a> | uni | 1 | <a href="#">1018</a> | bi  | 1 | <a href="#">2367</a> |
| 1 | <a href="#">2646</a> | 263 | uni | 1 | <a href="#">1667</a> | uni | 1 | <a href="#">1093</a> | uni | 1 | <a href="#">1017</a> | bi  | 1 | <a href="#">2368</a> |
| 1 | <a href="#">2647</a> | 268 | -   |   |                      | bi  | 1 | <a href="#">2474</a> | -   |   |                      | bi  | 1 | <a href="#">2369</a> |
| 1 | <a href="#">2648</a> | 339 | -   |   |                      | bi  | 1 | <a href="#">2475</a> | -   |   |                      | bi  | 1 | <a href="#">2371</a> |
| 1 | <a href="#">2649</a> | 36  | bi  | 1 | <a href="#">2334</a> | bi  | 1 | <a href="#">1697</a> | -   |   |                      | bi  | 1 | <a href="#">2372</a> |
| 1 | <a href="#">2650</a> | 75  | bi  | 1 | <a href="#">2335</a> | bi  | 1 | <a href="#">2477</a> | -   |   |                      | bi  | 1 | <a href="#">2373</a> |
| 1 | <a href="#">2651</a> | 100 | uni | 1 | <a href="#">1324</a> | bi  | 1 | <a href="#">2478</a> | -   |   |                      | bi  | 1 | <a href="#">2374</a> |
| 1 | <a href="#">2652</a> | 80  | -   |   |                      | uni | 1 | <a href="#">2480</a> | -   |   |                      | uni | 1 | <a href="#">1855</a> |
| 1 | <a href="#">2653</a> | 90  | -   |   |                      | bi  | 1 | <a href="#">2481</a> | -   |   |                      | -   |   |                      |
| 1 | <a href="#">2654</a> | 105 | -   |   |                      | -   |   |                      | -   |   |                      | -   |   |                      |
| 1 | <a href="#">2655</a> | 43  | -   |   |                      | -   |   |                      | -   |   |                      | -   |   |                      |
| 1 | <a href="#">2656</a> | 59  | -   |   |                      | -   |   |                      | -   |   |                      | bi  | 1 | <a href="#">2377</a> |
| 1 | <a href="#">2657</a> | 128 | -   |   |                      | -   |   |                      | -   |   |                      | -   |   |                      |
| 1 | <a href="#">2658</a> | 70  | -   |   |                      | -   |   |                      | -   |   |                      | -   |   |                      |
| 1 | <a href="#">2659</a> | 111 | uni | 1 | <a href="#">1317</a> | bi  | 1 | <a href="#">2483</a> | uni | 1 | <a href="#">1122</a> | bi  | 1 | <a href="#">2378</a> |
| 1 | <a href="#">2660</a> | 115 | -   |   |                      | bi  | 1 | <a href="#">2484</a> | -   |   |                      | bi  | 1 | <a href="#">2379</a> |
| 1 | <a href="#">2661</a> | 243 | uni | 1 | <a href="#">100</a>  | bi  | 1 | <a href="#">2485</a> | uni | 1 | <a href="#">2243</a> | uni | 1 | <a href="#">2460</a> |
| 1 | <a href="#">2662</a> | 394 | bi  | 1 | <a href="#">1314</a> | bi  | 1 | <a href="#">2486</a> | uni | 1 | <a href="#">1219</a> | uni | 1 | <a href="#">1546</a> |
| 1 | <a href="#">2663</a> | 50  | bi  | 1 | <a href="#">2889</a> | bi  | 1 | <a href="#">2487</a> | bi  | 1 | <a href="#">2105</a> | bi  | 1 | <a href="#">2262</a> |
| 1 | <a href="#">2664</a> | 712 | bi  | 1 | <a href="#">2890</a> | bi  | 1 | <a href="#">2488</a> | bi  | 1 | <a href="#">2106</a> | bi  | 1 | <a href="#">2263</a> |
| 1 | <a href="#">2665</a> | 646 | bi  | 1 | <a href="#">2891</a> | bi  | 1 | <a href="#">2489</a> | bi  | 1 | <a href="#">2107</a> | bi  | 1 | <a href="#">2264</a> |
| 1 | <a href="#">2666</a> | 60  | bi  | 1 | <a href="#">2892</a> | bi  | 1 | <a href="#">2490</a> | bi  | 1 | <a href="#">2108</a> | bi  | 1 | <a href="#">2265</a> |
| 1 | <a href="#">2667</a> | 475 | bi  | 1 | <a href="#">2896</a> | bi  | 1 | <a href="#">2494</a> | bi  | 1 | <a href="#">2112</a> | bi  | 1 | <a href="#">2269</a> |
| 1 | <a href="#">2668</a> | 288 | bi  | 1 | <a href="#">2897</a> | bi  | 1 | <a href="#">2495</a> | bi  | 1 | <a href="#">2113</a> | bi  | 1 | <a href="#">2270</a> |
| 1 | <a href="#">2669</a> | 194 | bi  | 1 | <a href="#">2898</a> | bi  | 1 | <a href="#">2496</a> | bi  | 1 | <a href="#">2114</a> | bi  | 1 | <a href="#">2271</a> |
| 1 | <a href="#">2670</a> | 315 | bi  | 1 | <a href="#">2899</a> | bi  | 1 | <a href="#">2497</a> | bi  | 1 | <a href="#">2115</a> | bi  | 1 | <a href="#">2272</a> |
| 1 | <a href="#">2671</a> | 273 | bi  | 1 | <a href="#">2900</a> | bi  | 1 | <a href="#">2498</a> | bi  | 1 | <a href="#">2116</a> | bi  | 1 | <a href="#">2273</a> |
| 1 | <a href="#">2672</a> | 240 | bi  | 1 | <a href="#">2901</a> | bi  | 1 | <a href="#">2500</a> | bi  | 1 | <a href="#">2117</a> | bi  | 1 | <a href="#">2275</a> |
| 1 | <a href="#">2673</a> | 393 | bi  | 1 | <a href="#">2902</a> | bi  | 1 | <a href="#">2501</a> | bi  | 1 | <a href="#">2118</a> | bi  | 1 | <a href="#">2276</a> |
| 1 | <a href="#">2674</a> | 247 | bi  | 1 | <a href="#">2903</a> | bi  | 1 | <a href="#">2502</a> | bi  | 1 | <a href="#">2119</a> | bi  | 1 | <a href="#">2277</a> |
| 1 | <a href="#">3351</a> | 50  | bi  | 1 | <a href="#">2904</a> | bi  | 1 | <a href="#">2503</a> | bi  | 1 | <a href="#">2120</a> | bi  | 1 | <a href="#">2278</a> |
| 1 | <a href="#">2675</a> | 197 | bi  | 1 | <a href="#">2905</a> | bi  | 1 | <a href="#">2504</a> | bi  | 1 | <a href="#">2121</a> | bi  | 1 | <a href="#">2279</a> |
| 1 | <a href="#">2676</a> | 220 | bi  | 1 | <a href="#">2906</a> | bi  | 1 | <a href="#">2505</a> | bi  | 1 | <a href="#">2122</a> | bi  | 1 | <a href="#">2280</a> |
| 1 | <a href="#">2677</a> | 104 | bi  | 1 | <a href="#">2907</a> | bi  | 1 | <a href="#">2506</a> | bi  | 1 | <a href="#">2123</a> | bi  | 1 | <a href="#">2281</a> |
| 1 | <a href="#">2678</a> | 370 | bi  | 1 | <a href="#">2908</a> | bi  | 1 | <a href="#">2507</a> | bi  | 1 | <a href="#">2124</a> | bi  | 1 | <a href="#">2282</a> |
| 1 | <a href="#">2679</a> | 176 | bi  | 1 | <a href="#">2909</a> | bi  | 1 | <a href="#">2508</a> | bi  | 1 | <a href="#">2125</a> | bi  | 1 | <a href="#">2283</a> |
| 1 | <a href="#">2680</a> | 263 | bi  | 1 | <a href="#">2910</a> | bi  | 1 | <a href="#">2509</a> | bi  | 1 | <a href="#">2126</a> | bi  | 1 | <a href="#">2284</a> |
| 1 | <a href="#">2681</a> | 289 | bi  | 1 | <a href="#">2911</a> | bi  | 1 | <a href="#">2510</a> | bi  | 1 | <a href="#">2127</a> | bi  | 1 | <a href="#">2285</a> |
| 1 | <a href="#">2682</a> | 457 | bi  | 1 | <a href="#">2912</a> | bi  | 1 | <a href="#">2511</a> | bi  | 1 | <a href="#">2128</a> | bi  | 1 | <a href="#">2286</a> |
| 1 | <a href="#">2683</a> | 142 | bi  | 1 | <a href="#">2913</a> | bi  | 1 | <a href="#">2512</a> | bi  | 1 | <a href="#">2129</a> | bi  | 1 | <a href="#">2287</a> |
| 1 | <a href="#">2684</a> | 163 | bi  | 1 | <a href="#">2914</a> | bi  | 1 | <a href="#">2513</a> | bi  | 1 | <a href="#">2130</a> | bi  | 1 | <a href="#">2288</a> |
| 1 | <a href="#">2685</a> | 412 | bi  | 1 | <a href="#">2915</a> | bi  | 1 | <a href="#">2514</a> | bi  | 1 | <a href="#">2131</a> | bi  | 1 | <a href="#">2289</a> |
| 1 | <a href="#">2686</a> | 246 | bi  | 1 | <a href="#">2916</a> | bi  | 1 | <a href="#">2515</a> | bi  | 1 | <a href="#">2132</a> | bi  | 1 | <a href="#">2290</a> |
| 1 | <a href="#">2687</a> | 310 | bi  | 1 | <a href="#">2917</a> | bi  | 1 | <a href="#">2516</a> | bi  | 1 | <a href="#">2133</a> | bi  | 1 | <a href="#">2291</a> |
| 1 | <a href="#">2688</a> | 319 | bi  | 1 | <a href="#">2918</a> | bi  | 1 | <a href="#">2517</a> | bi  | 1 | <a href="#">2134</a> | bi  | 1 | <a href="#">2292</a> |
| 1 | <a href="#">2689</a> | 76  | bi  | 1 | <a href="#">2919</a> | bi  | 1 | <a href="#">2518</a> | bi  | 1 | <a href="#">2135</a> | bi  | 1 | <a href="#">2293</a> |
| 1 | <a href="#">2690</a> | 322 | bi  | 1 | <a href="#">2920</a> | bi  | 1 | <a href="#">2519</a> | bi  | 1 | <a href="#">2136</a> | bi  | 1 | <a href="#">2294</a> |
| 1 | <a href="#">2691</a> | 151 | bi  | 1 | <a href="#">2921</a> | bi  | 1 | <a href="#">2520</a> | bi  | 1 | <a href="#">2137</a> | bi  | 1 | <a href="#">2295</a> |

|   |                      |     |     |   |                      |     |   |                      |     |   |                      |     |   |                      |
|---|----------------------|-----|-----|---|----------------------|-----|---|----------------------|-----|---|----------------------|-----|---|----------------------|
| 1 | <a href="#">2692</a> | 77  | bi  | 1 | <a href="#">2922</a> | bi  | 1 | <a href="#">2521</a> | bi  | 1 | <a href="#">2138</a> | bi  | 1 | <a href="#">2296</a> |
| 1 | <a href="#">2693</a> | 297 | bi  | 1 | <a href="#">2923</a> | bi  | 1 | <a href="#">2522</a> | bi  | 1 | <a href="#">2139</a> | bi  | 1 | <a href="#">2297</a> |
| 1 | <a href="#">2694</a> | 408 | bi  | 1 | <a href="#">2924</a> | bi  | 1 | <a href="#">2523</a> | bi  | 1 | <a href="#">2140</a> | bi  | 1 | <a href="#">2298</a> |
| 1 | <a href="#">2695</a> | 335 | bi  | 1 | <a href="#">2925</a> | bi  | 1 | <a href="#">2524</a> | bi  | 1 | <a href="#">2141</a> | bi  | 1 | <a href="#">2299</a> |
| 1 | <a href="#">2696</a> | 85  | -   |   |                      | -   |   |                      | -   |   |                      | -   |   |                      |
| 1 | <a href="#">2697</a> | 121 | bi  | 1 | <a href="#">2</a>    | bi  | 1 | <a href="#">2527</a> | bi  | 1 | <a href="#">2143</a> | bi  | 1 | <a href="#">2301</a> |
| 1 | <a href="#">2698</a> | 123 | bi  | 1 | <a href="#">3</a>    | bi  | 1 | <a href="#">2528</a> | bi  | 1 | <a href="#">2144</a> | bi  | 1 | <a href="#">2302</a> |
| 1 | <a href="#">2699</a> | 389 | bi  | 1 | <a href="#">4</a>    | bi  | 1 | <a href="#">2529</a> | bi  | 1 | <a href="#">2145</a> | bi  | 1 | <a href="#">2303</a> |
| 1 | <a href="#">2700</a> | 69  | bi  | 1 | <a href="#">5</a>    | bi  | 1 | <a href="#">2530</a> | -   |   |                      | bi  | 1 | <a href="#">2304</a> |
| 1 | <a href="#">2701</a> | 197 | bi  | 1 | <a href="#">6</a>    | bi  | 1 | <a href="#">2531</a> | bi  | 1 | <a href="#">2146</a> | bi  | 1 | <a href="#">2305</a> |
| 1 | <a href="#">2702</a> | 337 | bi  | 1 | <a href="#">7</a>    | bi  | 1 | <a href="#">2532</a> | bi  | 1 | <a href="#">2147</a> | bi  | 1 | <a href="#">2306</a> |
| 1 | <a href="#">2703</a> | 39  | -   |   |                      | -   |   |                      | -   |   |                      | -   |   |                      |
| 1 | <a href="#">2704</a> | 321 | bi  | 1 | <a href="#">8</a>    | bi  | 1 | <a href="#">2533</a> | bi  | 1 | <a href="#">2148</a> | bi  | 1 | <a href="#">2307</a> |
| 1 | <a href="#">2705</a> | 518 | bi  | 1 | <a href="#">9</a>    | bi  | 1 | <a href="#">2534</a> | bi  | 1 | <a href="#">2149</a> | bi  | 1 | <a href="#">2308</a> |
| 1 | <a href="#">2706</a> | 427 | bi  | 1 | <a href="#">10</a>   | bi  | 1 | <a href="#">2535</a> | bi  | 1 | <a href="#">2150</a> | bi  | 1 | <a href="#">2309</a> |
| 1 | <a href="#">2707</a> | 430 | bi  | 1 | <a href="#">11</a>   | bi  | 1 | <a href="#">2536</a> | bi  | 1 | <a href="#">2151</a> | bi  | 1 | <a href="#">2310</a> |
| 1 | <a href="#">2708</a> | 273 | bi  | 1 | <a href="#">12</a>   | bi  | 1 | <a href="#">2537</a> | bi  | 1 | <a href="#">2152</a> | bi  | 1 | <a href="#">2311</a> |
| 1 | <a href="#">2709</a> | 292 | bi  | 1 | <a href="#">13</a>   | bi  | 1 | <a href="#">2538</a> | bi  | 1 | <a href="#">2153</a> | bi  | 1 | <a href="#">2312</a> |
| 1 | <a href="#">2710</a> | 351 | bi  | 1 | <a href="#">14</a>   | bi  | 1 | <a href="#">2539</a> | bi  | 1 | <a href="#">2154</a> | bi  | 1 | <a href="#">2313</a> |
| 1 | <a href="#">2711</a> | 313 | bi  | 1 | <a href="#">15</a>   | bi  | 1 | <a href="#">2540</a> | bi  | 1 | <a href="#">2155</a> | bi  | 1 | <a href="#">2314</a> |
| 1 | <a href="#">2712</a> | 104 | bi  | 1 | <a href="#">16</a>   | bi  | 1 | <a href="#">2541</a> | bi  | 1 | <a href="#">2156</a> | bi  | 1 | <a href="#">2315</a> |
| 1 | <a href="#">2713</a> | 222 | bi  | 1 | <a href="#">17</a>   | bi  | 1 | <a href="#">2542</a> | bi  | 1 | <a href="#">2157</a> | bi  | 1 | <a href="#">2316</a> |
| 1 | <a href="#">2714</a> | 211 | bi  | 1 | <a href="#">18</a>   | bi  | 1 | <a href="#">2543</a> | bi  | 1 | <a href="#">2158</a> | bi  | 1 | <a href="#">2317</a> |
| 1 | <a href="#">2715</a> | 368 | bi  | 1 | <a href="#">19</a>   | bi  | 1 | <a href="#">2544</a> | bi  | 1 | <a href="#">2159</a> | bi  | 1 | <a href="#">2318</a> |
| 1 | <a href="#">2716</a> | 244 | bi  | 1 | <a href="#">20</a>   | bi  | 1 | <a href="#">2545</a> | bi  | 1 | <a href="#">2160</a> | bi  | 1 | <a href="#">2319</a> |
| 1 | <a href="#">2717</a> | 160 | bi  | 1 | <a href="#">21</a>   | bi  | 1 | <a href="#">2546</a> | bi  | 1 | <a href="#">2161</a> | bi  | 1 | <a href="#">2320</a> |
| 1 | <a href="#">2718</a> | 462 | bi  | 1 | <a href="#">23</a>   | bi  | 1 | <a href="#">2548</a> | bi  | 1 | <a href="#">2163</a> | bi  | 1 | <a href="#">2322</a> |
| 1 | <a href="#">2719</a> | 218 | bi  | 1 | <a href="#">24</a>   | bi  | 1 | <a href="#">2549</a> | bi  | 1 | <a href="#">2164</a> | bi  | 1 | <a href="#">2323</a> |
| 1 | <a href="#">2720</a> | 383 | bi  | 1 | <a href="#">25</a>   | bi  | 1 | <a href="#">2550</a> | bi  | 1 | <a href="#">2165</a> | bi  | 1 | <a href="#">2324</a> |
| 1 | <a href="#">2721</a> | 164 | bi  | 1 | <a href="#">26</a>   | bi  | 1 | <a href="#">2551</a> | bi  | 1 | <a href="#">2166</a> | bi  | 1 | <a href="#">2325</a> |
| 1 | <a href="#">2722</a> | 590 | bi  | 1 | <a href="#">27</a>   | bi  | 1 | <a href="#">2552</a> | bi  | 1 | <a href="#">2168</a> | bi  | 1 | <a href="#">2326</a> |
| 1 | <a href="#">2723</a> | 576 | bi  | 1 | <a href="#">28</a>   | bi  | 1 | <a href="#">2553</a> | bi  | 1 | <a href="#">2169</a> | bi  | 1 | <a href="#">2327</a> |
| 1 | <a href="#">2724</a> | 35  | -   |   |                      | -   |   |                      | -   |   |                      | -   |   |                      |
| 1 | <a href="#">2725</a> | 129 | bi  | 1 | <a href="#">29</a>   | bi  | 1 | <a href="#">2554</a> | bi  | 1 | <a href="#">2170</a> | bi  | 1 | <a href="#">2328</a> |
| 1 | <a href="#">2726</a> | 71  | bi  | 1 | <a href="#">30</a>   | bi  | 1 | <a href="#">2555</a> | bi  | 1 | <a href="#">2171</a> | bi  | 1 | <a href="#">2329</a> |
| 1 | <a href="#">2727</a> | 562 | bi  | 1 | <a href="#">31</a>   | bi  | 1 | <a href="#">2556</a> | bi  | 1 | <a href="#">2172</a> | bi  | 1 | <a href="#">2330</a> |
| 1 | <a href="#">2728</a> | 67  | bi  | 1 | <a href="#">32</a>   | bi  | 1 | <a href="#">2557</a> | bi  | 1 | <a href="#">2173</a> | bi  | 1 | <a href="#">2331</a> |
| 1 | <a href="#">2729</a> | 233 | bi  | 1 | <a href="#">33</a>   | bi  | 1 | <a href="#">2558</a> | bi  | 1 | <a href="#">2174</a> | bi  | 1 | <a href="#">2382</a> |
| 1 | <a href="#">2730</a> | 219 | bi  | 1 | <a href="#">34</a>   | bi  | 1 | <a href="#">2559</a> | bi  | 1 | <a href="#">2175</a> | bi  | 1 | <a href="#">2383</a> |
| 1 | <a href="#">2731</a> | 441 | bi  | 1 | <a href="#">35</a>   | bi  | 1 | <a href="#">2560</a> | bi  | 1 | <a href="#">2176</a> | bi  | 1 | <a href="#">2384</a> |
| 1 | <a href="#">2732</a> | 855 | bi  | 1 | <a href="#">36</a>   | bi  | 1 | <a href="#">2561</a> | bi  | 1 | <a href="#">2177</a> | bi  | 1 | <a href="#">2385</a> |
| 1 | <a href="#">2733</a> | 200 | bi  | 1 | <a href="#">37</a>   | bi  | 1 | <a href="#">2562</a> | bi  | 1 | <a href="#">2178</a> | bi  | 1 | <a href="#">2386</a> |
| 1 | <a href="#">2734</a> | 881 | bi  | 1 | <a href="#">38</a>   | bi  | 1 | <a href="#">2563</a> | bi  | 1 | <a href="#">2179</a> | bi  | 1 | <a href="#">2387</a> |
| 1 | <a href="#">2735</a> | 163 | bi  | 1 | <a href="#">39</a>   | bi  | 1 | <a href="#">2564</a> | bi  | 1 | <a href="#">2180</a> | bi  | 1 | <a href="#">2388</a> |
| 1 | <a href="#">2736</a> | 216 | bi  | 1 | <a href="#">40</a>   | bi  | 1 | <a href="#">2565</a> | bi  | 1 | <a href="#">2181</a> | bi  | 1 | <a href="#">2389</a> |
| 1 | <a href="#">2737</a> | 405 | bi  | 1 | <a href="#">41</a>   | bi  | 1 | <a href="#">2566</a> | bi  | 1 | <a href="#">2182</a> | bi  | 1 | <a href="#">2390</a> |
| 1 | <a href="#">2738</a> | 438 | bi  | 1 | <a href="#">42</a>   | bi  | 1 | <a href="#">2567</a> | bi  | 1 | <a href="#">2185</a> | bi  | 1 | <a href="#">2391</a> |
| 1 | <a href="#">2739</a> | 113 | -   |   |                      | -   |   |                      | -   |   |                      | -   |   |                      |
| 1 | <a href="#">2740</a> | 70  | uni | 1 | <a href="#">856</a>  | -   |   |                      | -   |   |                      | -   |   |                      |
| 1 | <a href="#">2741</a> | 93  | -   |   |                      | -   |   |                      | -   |   |                      | -   |   |                      |
| 1 | <a href="#">2742</a> | 68  | uni | 1 | <a href="#">1761</a> | uni | 1 | <a href="#">1194</a> | uni | 1 | <a href="#">1120</a> | uni | 1 | <a href="#">1187</a> |
| 1 | <a href="#">2743</a> | 191 | -   |   |                      | -   |   |                      | -   |   |                      | -   |   |                      |
| 1 | <a href="#">2744</a> | 66  | -   |   |                      | -   |   |                      | -   |   |                      | -   |   |                      |
| 1 | <a href="#">2745</a> | 186 | -   |   |                      | -   |   |                      | -   |   |                      | -   |   |                      |
| 1 | <a href="#">2746</a> | 178 | -   |   |                      | -   |   |                      | -   |   |                      | -   |   |                      |
| 1 | <a href="#">2747</a> | 161 | -   |   |                      | -   |   |                      | -   |   |                      | -   |   |                      |
| 1 | <a href="#">2748</a> | 47  | -   |   |                      | -   |   |                      | -   |   |                      | -   |   |                      |

|   |                      |     |     |   |                      |     |   |                      |     |   |                      |     |   |                      |
|---|----------------------|-----|-----|---|----------------------|-----|---|----------------------|-----|---|----------------------|-----|---|----------------------|
| 1 | <a href="#">2749</a> | 48  | -   |   |                      | -   |   |                      | -   |   |                      | -   |   |                      |
| 1 | <a href="#">3352</a> | 60  | -   |   |                      | -   |   |                      | -   |   |                      | -   |   |                      |
| 1 | <a href="#">2750</a> | 137 | -   |   |                      | -   |   |                      | -   |   |                      | -   |   |                      |
| 1 | <a href="#">2751</a> | 795 | -   |   |                      | -   |   |                      | -   |   |                      | -   |   |                      |
| 1 | <a href="#">2752</a> | 83  | -   |   |                      | -   |   |                      | -   |   |                      | -   |   |                      |
| 1 | <a href="#">2753</a> | 98  | -   |   |                      | -   |   |                      | -   |   |                      | -   |   |                      |
| 1 | <a href="#">2754</a> | 222 | -   |   |                      | -   |   |                      | -   |   |                      | -   |   |                      |
| 1 | <a href="#">2755</a> | 83  | -   |   |                      | -   |   |                      | -   |   |                      | -   |   |                      |
| 1 | <a href="#">2756</a> | 106 | -   |   |                      | -   |   |                      | -   |   |                      | -   |   |                      |
| 1 | <a href="#">2757</a> | 317 | uni | 1 | <a href="#">1316</a> | uni | 1 | <a href="#">248</a>  | uni | 1 | <a href="#">1122</a> | uni | 1 | <a href="#">1193</a> |
| 1 | <a href="#">2758</a> | 382 | bi  | 1 | <a href="#">2550</a> | uni | 1 | <a href="#">2486</a> | uni | 1 | <a href="#">1219</a> | bi  | 1 | <a href="#">1546</a> |
| 1 | <a href="#">2759</a> | 246 | bi  | 1 | <a href="#">43</a>   | bi  | 1 | <a href="#">2568</a> | bi  | 1 | <a href="#">2186</a> | bi  | 1 | <a href="#">2392</a> |
| 1 | <a href="#">2760</a> | 194 | bi  | 1 | <a href="#">44</a>   | bi  | 1 | <a href="#">2569</a> | bi  | 1 | <a href="#">2187</a> | bi  | 1 | <a href="#">2393</a> |
| 1 | <a href="#">2761</a> | 295 | bi  | 1 | <a href="#">45</a>   | bi  | 1 | <a href="#">2570</a> | bi  | 1 | <a href="#">2188</a> | bi  | 1 | <a href="#">2394</a> |
| 1 | <a href="#">2762</a> | 296 | bi  | 1 | <a href="#">46</a>   | bi  | 1 | <a href="#">2571</a> | bi  | 1 | <a href="#">2189</a> | bi  | 1 | <a href="#">2395</a> |
| 1 | <a href="#">2763</a> | 132 | bi  | 1 | <a href="#">47</a>   | bi  | 1 | <a href="#">2572</a> | bi  | 1 | <a href="#">2190</a> | bi  | 1 | <a href="#">2396</a> |
| 1 | <a href="#">2764</a> | 304 | bi  | 1 | <a href="#">48</a>   | bi  | 1 | <a href="#">2573</a> | bi  | 1 | <a href="#">2191</a> | bi  | 1 | <a href="#">2397</a> |
| 1 | <a href="#">2765</a> | 332 | bi  | 1 | <a href="#">49</a>   | bi  | 1 | <a href="#">2574</a> | bi  | 1 | <a href="#">2192</a> | bi  | 1 | <a href="#">2398</a> |
| 1 | <a href="#">2766</a> | 325 | bi  | 1 | <a href="#">50</a>   | bi  | 1 | <a href="#">2575</a> | bi  | 1 | <a href="#">2193</a> | bi  | 1 | <a href="#">2399</a> |
| 1 | <a href="#">2767</a> | 456 | bi  | 1 | <a href="#">51</a>   | bi  | 1 | <a href="#">2576</a> | bi  | 1 | <a href="#">2194</a> | bi  | 1 | <a href="#">2400</a> |
| 1 | <a href="#">2768</a> | 100 | bi  | 1 | <a href="#">52</a>   | bi  | 1 | <a href="#">2577</a> | bi  | 1 | <a href="#">2195</a> | bi  | 1 | <a href="#">2401</a> |
| 1 | <a href="#">2769</a> | 670 | bi  | 1 | <a href="#">53</a>   | bi  | 1 | <a href="#">2578</a> | bi  | 1 | <a href="#">2196</a> | bi  | 1 | <a href="#">2402</a> |
| 1 | <a href="#">2770</a> | 75  | bi  | 1 | <a href="#">54</a>   | bi  | 1 | <a href="#">2579</a> | bi  | 1 | <a href="#">2197</a> | bi  | 1 | <a href="#">2403</a> |
| 1 | <a href="#">2771</a> | 123 | bi  | 1 | <a href="#">55</a>   | bi  | 1 | <a href="#">2580</a> | bi  | 1 | <a href="#">2198</a> | bi  | 1 | <a href="#">2404</a> |
| 1 | <a href="#">2772</a> | 378 | bi  | 1 | <a href="#">56</a>   | bi  | 1 | <a href="#">2581</a> | bi  | 1 | <a href="#">2199</a> | bi  | 1 | <a href="#">2405</a> |
| 1 | <a href="#">2773</a> | 230 | bi  | 1 | <a href="#">57</a>   | bi  | 1 | <a href="#">2582</a> | bi  | 1 | <a href="#">2200</a> | bi  | 1 | <a href="#">2406</a> |
| 1 | <a href="#">2774</a> | 324 | bi  | 1 | <a href="#">58</a>   | bi  | 1 | <a href="#">2583</a> | bi  | 1 | <a href="#">2201</a> | bi  | 1 | <a href="#">2407</a> |
| 1 | <a href="#">2775</a> | 472 | bi  | 1 | <a href="#">59</a>   | bi  | 1 | <a href="#">2584</a> | bi  | 1 | <a href="#">2202</a> | bi  | 1 | <a href="#">2408</a> |
| 1 | <a href="#">2776</a> | 703 | bi  | 1 | <a href="#">60</a>   | bi  | 1 | <a href="#">2585</a> | bi  | 1 | <a href="#">2203</a> | bi  | 1 | <a href="#">2409</a> |
| 1 | <a href="#">2777</a> | 248 | bi  | 1 | <a href="#">1176</a> | uni | 1 | <a href="#">2586</a> | bi  | 1 | <a href="#">2204</a> | uni | 1 | <a href="#">2410</a> |
| 1 | <a href="#">2778</a> | 368 | bi  | 1 | <a href="#">62</a>   | uni | 1 | <a href="#">660</a>  | bi  | 1 | <a href="#">2205</a> | bi  | 1 | <a href="#">2411</a> |
| 1 | <a href="#">2779</a> | 281 | bi  | 1 | <a href="#">63</a>   | bi  | 1 | <a href="#">2588</a> | bi  | 1 | <a href="#">2206</a> | bi  | 1 | <a href="#">2412</a> |
| 1 | <a href="#">2780</a> | 250 | bi  | 1 | <a href="#">64</a>   | bi  | 1 | <a href="#">2589</a> | bi  | 1 | <a href="#">2207</a> | bi  | 1 | <a href="#">2413</a> |
| 1 | <a href="#">2781</a> | 165 | bi  | 1 | <a href="#">65</a>   | bi  | 1 | <a href="#">2590</a> | bi  | 1 | <a href="#">2208</a> | bi  | 1 | <a href="#">2414</a> |
| 1 | <a href="#">2782</a> | 134 | bi  | 1 | <a href="#">66</a>   | bi  | 1 | <a href="#">2591</a> | bi  | 1 | <a href="#">2209</a> | bi  | 1 | <a href="#">2415</a> |
| 1 | <a href="#">2783</a> | 938 | bi  | 1 | <a href="#">67</a>   | bi  | 1 | <a href="#">2592</a> | bi  | 1 | <a href="#">2210</a> | bi  | 1 | <a href="#">2416</a> |
| 1 | <a href="#">2784</a> | 176 | bi  | 1 | <a href="#">68</a>   | bi  | 1 | <a href="#">2593</a> | bi  | 1 | <a href="#">2211</a> | bi  | 1 | <a href="#">2417</a> |
| 1 | <a href="#">2785</a> | 483 | bi  | 1 | <a href="#">69</a>   | bi  | 1 | <a href="#">2594</a> | bi  | 1 | <a href="#">2212</a> | bi  | 1 | <a href="#">2418</a> |
| 1 | <a href="#">2786</a> | 222 | bi  | 1 | <a href="#">70</a>   | bi  | 1 | <a href="#">2595</a> | bi  | 1 | <a href="#">2213</a> | bi  | 1 | <a href="#">2419</a> |
| 1 | <a href="#">2787</a> | 403 | bi  | 1 | <a href="#">71</a>   | bi  | 1 | <a href="#">2596</a> | bi  | 1 | <a href="#">2214</a> | bi  | 1 | <a href="#">2420</a> |
| 1 | <a href="#">2788</a> | 225 | bi  | 1 | <a href="#">72</a>   | bi  | 1 | <a href="#">2597</a> | bi  | 1 | <a href="#">2215</a> | bi  | 1 | <a href="#">2421</a> |
| 1 | <a href="#">2789</a> | 389 | bi  | 1 | <a href="#">73</a>   | bi  | 1 | <a href="#">2598</a> | bi  | 1 | <a href="#">2216</a> | bi  | 1 | <a href="#">2422</a> |
| 1 | <a href="#">2790</a> | 100 | bi  | 1 | <a href="#">74</a>   | bi  | 1 | <a href="#">2599</a> | bi  | 1 | <a href="#">2217</a> | bi  | 1 | <a href="#">2423</a> |
| 1 | <a href="#">2791</a> | 550 | bi  | 1 | <a href="#">75</a>   | bi  | 1 | <a href="#">2600</a> | bi  | 1 | <a href="#">2218</a> | bi  | 1 | <a href="#">2424</a> |
| 1 | <a href="#">2792</a> | 105 | bi  | 1 | <a href="#">76</a>   | bi  | 1 | <a href="#">2601</a> | bi  | 1 | <a href="#">2219</a> | bi  | 1 | <a href="#">2425</a> |
| 1 | <a href="#">2793</a> | 87  | bi  | 1 | <a href="#">77</a>   | bi  | 1 | <a href="#">2602</a> | bi  | 1 | <a href="#">2220</a> | bi  | 1 | <a href="#">2426</a> |
| 1 | <a href="#">2794</a> | 420 | bi  | 1 | <a href="#">78</a>   | bi  | 1 | <a href="#">2603</a> | bi  | 1 | <a href="#">2221</a> | bi  | 1 | <a href="#">2427</a> |
| 1 | <a href="#">2795</a> | 403 | bi  | 1 | <a href="#">79</a>   | bi  | 1 | <a href="#">2604</a> | bi  | 1 | <a href="#">2222</a> | bi  | 1 | <a href="#">2428</a> |
| 1 | <a href="#">2796</a> | 542 | bi  | 1 | <a href="#">80</a>   | bi  | 1 | <a href="#">2605</a> | bi  | 1 | <a href="#">2223</a> | bi  | 1 | <a href="#">2429</a> |
| 1 | <a href="#">2797</a> | 262 | bi  | 1 | <a href="#">81</a>   | bi  | 1 | <a href="#">2606</a> | bi  | 1 | <a href="#">2224</a> | bi  | 1 | <a href="#">2430</a> |
| 1 | <a href="#">2798</a> | 408 | bi  | 1 | <a href="#">82</a>   | bi  | 1 | <a href="#">2607</a> | bi  | 1 | <a href="#">2225</a> | bi  | 1 | <a href="#">2431</a> |
| 1 | <a href="#">2799</a> | 455 | bi  | 1 | <a href="#">83</a>   | bi  | 1 | <a href="#">2608</a> | bi  | 1 | <a href="#">2226</a> | bi  | 1 | <a href="#">2432</a> |
| 1 | <a href="#">2800</a> | 499 | bi  | 1 | <a href="#">84</a>   | bi  | 1 | <a href="#">2609</a> | bi  | 1 | <a href="#">2227</a> | bi  | 1 | <a href="#">2433</a> |
| 1 | <a href="#">2801</a> | 172 | bi  | 1 | <a href="#">85</a>   | bi  | 1 | <a href="#">2610</a> | bi  | 1 | <a href="#">2228</a> | bi  | 1 | <a href="#">2434</a> |
| 1 | <a href="#">2802</a> | 151 | bi  | 1 | <a href="#">86</a>   | bi  | 1 | <a href="#">2611</a> | bi  | 1 | <a href="#">2229</a> | bi  | 1 | <a href="#">2435</a> |
| 1 | <a href="#">2803</a> | 231 | bi  | 1 | <a href="#">87</a>   | bi  | 1 | <a href="#">2612</a> | bi  | 1 | <a href="#">2230</a> | bi  | 1 | <a href="#">2437</a> |
| 1 | <a href="#">2804</a> | 540 | bi  | 1 | <a href="#">88</a>   | bi  | 1 | <a href="#">2613</a> | bi  | 1 | <a href="#">2231</a> | bi  | 1 | <a href="#">2438</a> |

|   |                      |      |     |   |                      |    |   |                      |     |   |                      |     |   |                      |
|---|----------------------|------|-----|---|----------------------|----|---|----------------------|-----|---|----------------------|-----|---|----------------------|
| 1 | <a href="#">2805</a> | 356  | bi  | 1 | <a href="#">89</a>   | bi | 1 | <a href="#">2614</a> | bi  | 1 | <a href="#">2232</a> | bi  | 1 | <a href="#">2439</a> |
| 1 | <a href="#">2806</a> | 219  | bi  | 1 | <a href="#">90</a>   | bi | 1 | <a href="#">2615</a> | bi  | 1 | <a href="#">2233</a> | -   |   |                      |
| 1 | <a href="#">2807</a> | 358  | bi  | 1 | <a href="#">91</a>   | -  |   |                      | bi  | 1 | <a href="#">2234</a> | bi  | 1 | <a href="#">2445</a> |
| 1 | <a href="#">2808</a> | 552  | bi  | 1 | <a href="#">92</a>   | bi | 1 | <a href="#">2622</a> | bi  | 1 | <a href="#">2235</a> | bi  | 1 | <a href="#">2452</a> |
| 1 | <a href="#">2809</a> | 289  | bi  | 1 | <a href="#">93</a>   | bi | 1 | <a href="#">2623</a> | bi  | 1 | <a href="#">2236</a> | bi  | 1 | <a href="#">2453</a> |
| 1 | <a href="#">2810</a> | 520  | bi  | 1 | <a href="#">94</a>   | bi | 1 | <a href="#">2624</a> | bi  | 1 | <a href="#">2237</a> | bi  | 1 | <a href="#">2454</a> |
| 1 | <a href="#">2811</a> | 475  | bi  | 1 | <a href="#">95</a>   | bi | 1 | <a href="#">2625</a> | bi  | 1 | <a href="#">2238</a> | bi  | 1 | <a href="#">2455</a> |
| 1 | <a href="#">2812</a> | 394  | bi  | 1 | <a href="#">96</a>   | bi | 1 | <a href="#">2626</a> | bi  | 1 | <a href="#">2239</a> | bi  | 1 | <a href="#">2456</a> |
| 1 | <a href="#">2813</a> | 483  | bi  | 1 | <a href="#">97</a>   | bi | 1 | <a href="#">2627</a> | bi  | 1 | <a href="#">2240</a> | bi  | 1 | <a href="#">2457</a> |
| 1 | <a href="#">2814</a> | 851  | bi  | 1 | <a href="#">98</a>   | bi | 1 | <a href="#">2628</a> | bi  | 1 | <a href="#">2241</a> | bi  | 1 | <a href="#">2458</a> |
| 1 | <a href="#">2815</a> | 421  | bi  | 1 | <a href="#">99</a>   | bi | 1 | <a href="#">2629</a> | bi  | 1 | <a href="#">2242</a> | bi  | 1 | <a href="#">2459</a> |
| 1 | <a href="#">2816</a> | 128  | bi  | 1 | <a href="#">100</a>  | bi | 1 | <a href="#">2630</a> | bi  | 1 | <a href="#">2243</a> | bi  | 1 | <a href="#">2460</a> |
| 1 | <a href="#">3353</a> | 247  | bi  | 1 | <a href="#">102</a>  | bi | 1 | <a href="#">2631</a> | bi  | 1 | <a href="#">2244</a> | bi  | 1 | <a href="#">2461</a> |
| 1 | <a href="#">2817</a> | 594  | bi  | 1 | <a href="#">103</a>  | bi | 1 | <a href="#">2632</a> | bi  | 1 | <a href="#">2245</a> | bi  | 1 | <a href="#">2462</a> |
| 1 | <a href="#">2818</a> | 309  | bi  | 1 | <a href="#">104</a>  | bi | 1 | <a href="#">2633</a> | bi  | 1 | <a href="#">2246</a> | bi  | 1 | <a href="#">2463</a> |
| 1 | <a href="#">2819</a> | 155  | bi  | 1 | <a href="#">105</a>  | bi | 1 | <a href="#">2634</a> | bi  | 1 | <a href="#">2247</a> | bi  | 1 | <a href="#">2464</a> |
| 1 | <a href="#">2820</a> | 170  | bi  | 1 | <a href="#">106</a>  | bi | 1 | <a href="#">2635</a> | bi  | 1 | <a href="#">2248</a> | bi  | 1 | <a href="#">2465</a> |
| 1 | <a href="#">2821</a> | 463  | bi  | 1 | <a href="#">107</a>  | bi | 1 | <a href="#">2636</a> | bi  | 1 | <a href="#">2249</a> | bi  | 1 | <a href="#">2466</a> |
| 1 | <a href="#">2822</a> | 1373 | bi  | 1 | <a href="#">109</a>  | bi | 1 | <a href="#">2637</a> | bi  | 1 | <a href="#">2250</a> | bi  | 1 | <a href="#">2467</a> |
| 1 | <a href="#">2823</a> | 39   | bi  | 1 | <a href="#">110</a>  | bi | 1 | <a href="#">2638</a> | bi  | 1 | <a href="#">2251</a> | bi  | 1 | <a href="#">2468</a> |
| 1 | <a href="#">2824</a> | 160  | bi  | 1 | <a href="#">111</a>  | bi | 1 | <a href="#">2639</a> | bi  | 1 | <a href="#">2252</a> | bi  | 1 | <a href="#">2469</a> |
| 1 | <a href="#">2825</a> | 433  | bi  | 1 | <a href="#">112</a>  | bi | 1 | <a href="#">2640</a> | bi  | 1 | <a href="#">2253</a> | bi  | 1 | <a href="#">2470</a> |
| 1 | <a href="#">2826</a> | 207  | bi  | 1 | <a href="#">113</a>  | bi | 1 | <a href="#">2641</a> | bi  | 1 | <a href="#">2254</a> | bi  | 1 | <a href="#">2471</a> |
| 1 | <a href="#">2827</a> | 273  | uni | 1 | <a href="#">2260</a> | bi | 1 | <a href="#">2642</a> | uni | 1 | <a href="#">1567</a> | uni | 1 | <a href="#">1676</a> |
| 1 | <a href="#">2828</a> | 257  | uni | 1 | <a href="#">2261</a> | bi | 1 | <a href="#">2643</a> | uni | 1 | <a href="#">1568</a> | uni | 1 | <a href="#">1677</a> |
| 1 | <a href="#">2829</a> | 158  | uni | 1 | <a href="#">2262</a> | bi | 1 | <a href="#">2644</a> | uni | 1 | <a href="#">1569</a> | uni | 1 | <a href="#">337</a>  |
| 1 | <a href="#">2830</a> | 248  | -   |   |                      | bi | 1 | <a href="#">2645</a> | -   |   |                      | -   |   |                      |
| 1 | <a href="#">2831</a> | 137  | uni | 1 | <a href="#">278</a>  | bi | 1 | <a href="#">2646</a> | uni | 1 | <a href="#">532</a>  | uni | 1 | <a href="#">2632</a> |
| 1 | <a href="#">2832</a> | 244  | uni | 1 | <a href="#">2030</a> | bi | 1 | <a href="#">2647</a> | uni | 1 | <a href="#">1380</a> | uni | 1 | <a href="#">1464</a> |
| 1 | <a href="#">2833</a> | 152  | bi  | 1 | <a href="#">114</a>  | bi | 1 | <a href="#">2648</a> | bi  | 1 | <a href="#">2255</a> | bi  | 1 | <a href="#">2472</a> |
| 1 | <a href="#">2834</a> | 105  | bi  | 1 | <a href="#">115</a>  | bi | 1 | <a href="#">2649</a> | bi  | 1 | <a href="#">2256</a> | bi  | 1 | <a href="#">2473</a> |
| 1 | <a href="#">2835</a> | 359  | bi  | 1 | <a href="#">116</a>  | bi | 1 | <a href="#">2650</a> | bi  | 1 | <a href="#">2257</a> | bi  | 1 | <a href="#">2474</a> |
| 1 | <a href="#">2836</a> | 114  | bi  | 1 | <a href="#">117</a>  | bi | 1 | <a href="#">2651</a> | bi  | 1 | <a href="#">2258</a> | bi  | 1 | <a href="#">2475</a> |
| 1 | <a href="#">2837</a> | 37   | -   |   |                      | -  |   |                      | -   |   |                      | -   |   |                      |
| 1 | <a href="#">2838</a> | 552  | bi  | 1 | <a href="#">118</a>  | bi | 1 | <a href="#">2652</a> | bi  | 1 | <a href="#">2259</a> | bi  | 1 | <a href="#">2476</a> |
| 1 | <a href="#">2839</a> | 273  | bi  | 1 | <a href="#">119</a>  | bi | 1 | <a href="#">2653</a> | bi  | 1 | <a href="#">2260</a> | bi  | 1 | <a href="#">2477</a> |
| 1 | <a href="#">2840</a> | 258  | bi  | 1 | <a href="#">120</a>  | bi | 1 | <a href="#">2654</a> | bi  | 1 | <a href="#">2261</a> | bi  | 1 | <a href="#">2478</a> |
| 1 | <a href="#">2841</a> | 384  | bi  | 1 | <a href="#">121</a>  | bi | 1 | <a href="#">2655</a> | bi  | 1 | <a href="#">2263</a> | bi  | 1 | <a href="#">2479</a> |
| 1 | <a href="#">2842</a> | 159  | bi  | 1 | <a href="#">122</a>  | bi | 1 | <a href="#">2656</a> | bi  | 1 | <a href="#">2264</a> | bi  | 1 | <a href="#">2480</a> |
| 1 | <a href="#">2843</a> | 146  | bi  | 1 | <a href="#">123</a>  | bi | 1 | <a href="#">2657</a> | bi  | 1 | <a href="#">2265</a> | bi  | 1 | <a href="#">2481</a> |
| 1 | <a href="#">2844</a> | 365  | bi  | 1 | <a href="#">124</a>  | bi | 1 | <a href="#">2658</a> | bi  | 1 | <a href="#">2266</a> | bi  | 1 | <a href="#">2482</a> |
| 1 | <a href="#">2845</a> | 263  | bi  | 1 | <a href="#">125</a>  | bi | 1 | <a href="#">2659</a> | bi  | 1 | <a href="#">2267</a> | bi  | 1 | <a href="#">2483</a> |
| 1 | <a href="#">2846</a> | 251  | bi  | 1 | <a href="#">126</a>  | bi | 1 | <a href="#">2660</a> | bi  | 1 | <a href="#">2268</a> | bi  | 1 | <a href="#">2484</a> |
| 1 | <a href="#">2847</a> | 184  | bi  | 1 | <a href="#">127</a>  | bi | 1 | <a href="#">2661</a> | bi  | 1 | <a href="#">2269</a> | bi  | 1 | <a href="#">2485</a> |
| 1 | <a href="#">2848</a> | 256  | bi  | 1 | <a href="#">128</a>  | bi | 1 | <a href="#">2662</a> | bi  | 1 | <a href="#">2270</a> | bi  | 1 | <a href="#">2486</a> |
| 1 | <a href="#">2849</a> | 121  | bi  | 1 | <a href="#">129</a>  | bi | 1 | <a href="#">2663</a> | bi  | 1 | <a href="#">2271</a> | bi  | 1 | <a href="#">2487</a> |
| 1 | <a href="#">2850</a> | 192  | bi  | 1 | <a href="#">130</a>  | bi | 1 | <a href="#">2664</a> | bi  | 1 | <a href="#">2272</a> | bi  | 1 | <a href="#">2488</a> |
| 1 | <a href="#">2851</a> | 209  | bi  | 1 | <a href="#">131</a>  | bi | 1 | <a href="#">2665</a> | bi  | 1 | <a href="#">2273</a> | bi  | 1 | <a href="#">2489</a> |
| 1 | <a href="#">2852</a> | 262  | bi  | 1 | <a href="#">132</a>  | bi | 1 | <a href="#">2666</a> | bi  | 1 | <a href="#">2274</a> | bi  | 1 | <a href="#">2490</a> |
| 1 | <a href="#">2853</a> | 245  | bi  | 1 | <a href="#">133</a>  | bi | 1 | <a href="#">2667</a> | bi  | 1 | <a href="#">2275</a> | bi  | 1 | <a href="#">2491</a> |
| 1 | <a href="#">2854</a> | 92   | bi  | 1 | <a href="#">134</a>  | bi | 1 | <a href="#">2668</a> | bi  | 1 | <a href="#">2276</a> | bi  | 1 | <a href="#">2492</a> |
| 1 | <a href="#">2855</a> | 157  | bi  | 1 | <a href="#">135</a>  | bi | 1 | <a href="#">2669</a> | bi  | 1 | <a href="#">2277</a> | bi  | 1 | <a href="#">2493</a> |
| 1 | <a href="#">2856</a> | 190  | bi  | 1 | <a href="#">136</a>  | bi | 1 | <a href="#">2670</a> | bi  | 1 | <a href="#">2278</a> | bi  | 1 | <a href="#">2494</a> |
| 1 | <a href="#">2857</a> | 483  | bi  | 1 | <a href="#">137</a>  | bi | 1 | <a href="#">2671</a> | bi  | 1 | <a href="#">2279</a> | bi  | 1 | <a href="#">2495</a> |
| 1 | <a href="#">2858</a> | 170  | bi  | 1 | <a href="#">138</a>  | bi | 1 | <a href="#">2672</a> | bi  | 1 | <a href="#">2280</a> | bi  | 1 | <a href="#">2496</a> |
| 1 | <a href="#">2859</a> | 287  | bi  | 1 | <a href="#">139</a>  | bi | 1 | <a href="#">2673</a> | bi  | 1 | <a href="#">2281</a> | bi  | 1 | <a href="#">2497</a> |
| 1 | <a href="#">2860</a> | 92   | -   |   |                      | -  |   |                      | -   |   |                      | -   |   |                      |

|   |                      |      |     |   |                      |     |   |                      |     |   |                      |     |   |                      |
|---|----------------------|------|-----|---|----------------------|-----|---|----------------------|-----|---|----------------------|-----|---|----------------------|
| 1 | <a href="#">2861</a> | 705  | bi  | 1 | <a href="#">140</a>  | bi  | 1 | <a href="#">2674</a> | bi  | 1 | <a href="#">2282</a> | bi  | 1 | <a href="#">2498</a> |
| 1 | <a href="#">2862</a> | 90   | bi  | 1 | <a href="#">141</a>  | bi  | 1 | <a href="#">2675</a> | bi  | 1 | <a href="#">2283</a> | bi  | 1 | <a href="#">2499</a> |
| 1 | <a href="#">2863</a> | 188  | bi  | 1 | <a href="#">142</a>  | bi  | 1 | <a href="#">2676</a> | bi  | 1 | <a href="#">2284</a> | bi  | 1 | <a href="#">2500</a> |
| 1 | <a href="#">2864</a> | 259  | bi  | 1 | <a href="#">143</a>  | bi  | 1 | <a href="#">2677</a> | bi  | 1 | <a href="#">2285</a> | bi  | 1 | <a href="#">2501</a> |
| 1 | <a href="#">2865</a> | 218  | bi  | 1 | <a href="#">144</a>  | bi  | 1 | <a href="#">2678</a> | bi  | 1 | <a href="#">2286</a> | bi  | 1 | <a href="#">2502</a> |
| 1 | <a href="#">2866</a> | 268  | bi  | 1 | <a href="#">145</a>  | bi  | 1 | <a href="#">2679</a> | bi  | 1 | <a href="#">2287</a> | bi  | 1 | <a href="#">2503</a> |
| 1 | <a href="#">2867</a> | 204  | bi  | 1 | <a href="#">146</a>  | bi  | 1 | <a href="#">2680</a> | bi  | 1 | <a href="#">2288</a> | bi  | 1 | <a href="#">2504</a> |
| 1 | <a href="#">2868</a> | 35   | -   |   |                      | -   |   |                      | -   |   |                      | -   |   |                      |
| 1 | <a href="#">2869</a> | 183  | bi  | 1 | <a href="#">147</a>  | bi  | 1 | <a href="#">2681</a> | bi  | 1 | <a href="#">2289</a> | bi  | 1 | <a href="#">2505</a> |
| 1 | <a href="#">2870</a> | 179  | bi  | 1 | <a href="#">148</a>  | bi  | 1 | <a href="#">2682</a> | bi  | 1 | <a href="#">2290</a> | bi  | 1 | <a href="#">2506</a> |
| 1 | <a href="#">2871</a> | 1295 | bi  | 1 | <a href="#">149</a>  | bi  | 1 | <a href="#">2684</a> | bi  | 1 | <a href="#">2291</a> | bi  | 1 | <a href="#">2507</a> |
| 1 | <a href="#">2872</a> | 1427 | bi  | 1 | <a href="#">150</a>  | bi  | 1 | <a href="#">2836</a> | bi  | 1 | <a href="#">2292</a> | bi  | 1 | <a href="#">2508</a> |
| 1 | <a href="#">2873</a> | 121  | bi  | 1 | <a href="#">151</a>  | bi  | 1 | <a href="#">2686</a> | bi  | 1 | <a href="#">2293</a> | bi  | 1 | <a href="#">2509</a> |
| 1 | <a href="#">2874</a> | 204  | bi  | 1 | <a href="#">152</a>  | bi  | 1 | <a href="#">2687</a> | bi  | 1 | <a href="#">2294</a> | bi  | 1 | <a href="#">2510</a> |
| 1 | <a href="#">2875</a> | 186  | bi  | 1 | <a href="#">153</a>  | bi  | 1 | <a href="#">2688</a> | bi  | 1 | <a href="#">2295</a> | bi  | 1 | <a href="#">2511</a> |
| 1 | <a href="#">2876</a> | 407  | bi  | 1 | <a href="#">154</a>  | bi  | 1 | <a href="#">2689</a> | bi  | 1 | <a href="#">2296</a> | bi  | 1 | <a href="#">2512</a> |
| 1 | <a href="#">2877</a> | 548  | bi  | 1 | <a href="#">155</a>  | bi  | 1 | <a href="#">2690</a> | bi  | 1 | <a href="#">2297</a> | bi  | 1 | <a href="#">2513</a> |
| 1 | <a href="#">2878</a> | 318  | bi  | 1 | <a href="#">156</a>  | bi  | 1 | <a href="#">2691</a> | bi  | 1 | <a href="#">2298</a> | bi  | 1 | <a href="#">2514</a> |
| 1 | <a href="#">2879</a> | 252  | bi  | 1 | <a href="#">157</a>  | bi  | 1 | <a href="#">2692</a> | bi  | 1 | <a href="#">2299</a> | bi  | 1 | <a href="#">2515</a> |
| 1 | <a href="#">2880</a> | 322  | bi  | 1 | <a href="#">158</a>  | bi  | 1 | <a href="#">2693</a> | bi  | 1 | <a href="#">2300</a> | bi  | 1 | <a href="#">2516</a> |
| 1 | <a href="#">2881</a> | 316  | bi  | 1 | <a href="#">159</a>  | bi  | 1 | <a href="#">2694</a> | bi  | 1 | <a href="#">2301</a> | bi  | 1 | <a href="#">2517</a> |
| 1 | <a href="#">2882</a> | 151  | bi  | 1 | <a href="#">160</a>  | bi  | 1 | <a href="#">2695</a> | bi  | 1 | <a href="#">2302</a> | bi  | 1 | <a href="#">2518</a> |
| 1 | <a href="#">2883</a> | 46   | uni | 1 | <a href="#">305</a>  | uni | 1 | <a href="#">2833</a> | bi  | 1 | <a href="#">2303</a> | bi  | 1 | <a href="#">2519</a> |
| 1 | <a href="#">2884</a> | 61   | -   |   |                      | -   |   |                      | uni | 1 | <a href="#">2303</a> | uni | 1 | <a href="#">2519</a> |
| 1 | <a href="#">2885</a> | 757  | bi  | 1 | <a href="#">161</a>  | bi  | 1 | <a href="#">2696</a> | bi  | 1 | <a href="#">2304</a> | bi  | 1 | <a href="#">2520</a> |
| 1 | <a href="#">2886</a> | 167  | bi  | 1 | <a href="#">162</a>  | bi  | 1 | <a href="#">2697</a> | bi  | 1 | <a href="#">2305</a> | bi  | 1 | <a href="#">2521</a> |
| 1 | <a href="#">2887</a> | 299  | bi  | 1 | <a href="#">163</a>  | bi  | 1 | <a href="#">2698</a> | bi  | 1 | <a href="#">2306</a> | bi  | 1 | <a href="#">2522</a> |
| 1 | <a href="#">2888</a> | 133  | bi  | 1 | <a href="#">164</a>  | bi  | 1 | <a href="#">2699</a> | bi  | 1 | <a href="#">2307</a> | bi  | 1 | <a href="#">2523</a> |
| 1 | <a href="#">2889</a> | 162  | bi  | 1 | <a href="#">165</a>  | bi  | 1 | <a href="#">2700</a> | bi  | 1 | <a href="#">2308</a> | bi  | 1 | <a href="#">2524</a> |
| 1 | <a href="#">2890</a> | 443  | bi  | 1 | <a href="#">166</a>  | bi  | 1 | <a href="#">2701</a> | bi  | 1 | <a href="#">2309</a> | bi  | 1 | <a href="#">2525</a> |
| 1 | <a href="#">2891</a> | 276  | bi  | 1 | <a href="#">167</a>  | bi  | 1 | <a href="#">2702</a> | bi  | 1 | <a href="#">2310</a> | bi  | 1 | <a href="#">2526</a> |
| 1 | <a href="#">2892</a> | 1193 | bi  | 1 | <a href="#">168</a>  | bi  | 1 | <a href="#">2703</a> | bi  | 1 | <a href="#">2311</a> | bi  | 1 | <a href="#">2527</a> |
| 1 | <a href="#">2893</a> | 231  | bi  | 1 | <a href="#">170</a>  | bi  | 1 | <a href="#">2705</a> | bi  | 1 | <a href="#">2312</a> | bi  | 1 | <a href="#">2528</a> |
| 1 | <a href="#">2894</a> | 173  | -   |   |                      | -   |   |                      | -   |   |                      | -   |   |                      |
| 1 | <a href="#">2895</a> | 391  | uni | 1 | <a href="#">2146</a> | -   |   |                      | -   |   |                      | uni | 1 | <a href="#">1007</a> |
| 1 | <a href="#">2896</a> | 127  | -   |   |                      | -   |   |                      | -   |   |                      | -   |   |                      |
| 1 | <a href="#">2897</a> | 89   | -   |   |                      | -   |   |                      | -   |   |                      | -   |   |                      |
| 1 | <a href="#">2898</a> | 398  | -   |   |                      | -   |   |                      | -   |   |                      | -   |   |                      |
| 1 | <a href="#">2899</a> | 242  | uni | 1 | <a href="#">2392</a> | uni | 1 | <a href="#">1756</a> | uni | 1 | <a href="#">1645</a> | uni | 1 | <a href="#">1753</a> |
| 1 | <a href="#">2900</a> | 72   | -   |   |                      | -   |   |                      | -   |   |                      | -   |   |                      |
| 1 | <a href="#">2901</a> | 594  | bi  | 1 | <a href="#">171</a>  | bi  | 1 | <a href="#">2707</a> | bi  | 1 | <a href="#">2313</a> | bi  | 1 | <a href="#">2529</a> |
| 1 | <a href="#">2902</a> | 308  | bi  | 1 | <a href="#">172</a>  | bi  | 1 | <a href="#">2708</a> | bi  | 1 | <a href="#">2314</a> | bi  | 1 | <a href="#">2530</a> |
| 1 | <a href="#">2903</a> | 321  | bi  | 1 | <a href="#">173</a>  | bi  | 1 | <a href="#">2709</a> | bi  | 1 | <a href="#">2315</a> | bi  | 1 | <a href="#">2531</a> |
| 1 | <a href="#">2904</a> | 315  | bi  | 1 | <a href="#">174</a>  | bi  | 1 | <a href="#">2710</a> | bi  | 1 | <a href="#">2316</a> | bi  | 1 | <a href="#">2532</a> |
| 1 | <a href="#">2905</a> | 336  | bi  | 1 | <a href="#">175</a>  | bi  | 1 | <a href="#">2711</a> | bi  | 1 | <a href="#">2317</a> | bi  | 1 | <a href="#">2533</a> |
| 1 | <a href="#">2906</a> | 80   | bi  | 1 | <a href="#">176</a>  | bi  | 1 | <a href="#">2713</a> | bi  | 1 | <a href="#">2318</a> | bi  | 1 | <a href="#">2535</a> |
| 1 | <a href="#">2907</a> | 334  | bi  | 1 | <a href="#">177</a>  | bi  | 1 | <a href="#">2714</a> | bi  | 1 | <a href="#">2319</a> | bi  | 1 | <a href="#">2536</a> |
| 1 | <a href="#">2908</a> | 679  | bi  | 1 | <a href="#">178</a>  | bi  | 1 | <a href="#">2715</a> | bi  | 1 | <a href="#">2320</a> | bi  | 1 | <a href="#">2537</a> |
| 1 | <a href="#">2909</a> | 559  | bi  | 1 | <a href="#">179</a>  | bi  | 1 | <a href="#">2716</a> | bi  | 1 | <a href="#">2321</a> | bi  | 1 | <a href="#">2538</a> |
| 1 | <a href="#">2910</a> | 121  | bi  | 1 | <a href="#">180</a>  | bi  | 1 | <a href="#">2717</a> | bi  | 1 | <a href="#">2322</a> | bi  | 1 | <a href="#">2539</a> |
| 1 | <a href="#">2911</a> | 63   | bi  | 1 | <a href="#">185</a>  | bi  | 1 | <a href="#">2722</a> | bi  | 1 | <a href="#">2327</a> | bi  | 1 | <a href="#">2545</a> |
| 1 | <a href="#">2912</a> | 215  | bi  | 1 | <a href="#">186</a>  | bi  | 1 | <a href="#">2723</a> | bi  | 1 | <a href="#">2328</a> | bi  | 1 | <a href="#">2546</a> |
| 1 | <a href="#">2913</a> | 218  | bi  | 1 | <a href="#">187</a>  | bi  | 1 | <a href="#">2724</a> | bi  | 1 | <a href="#">2329</a> | bi  | 1 | <a href="#">2547</a> |
| 1 | <a href="#">2914</a> | 298  | bi  | 1 | <a href="#">188</a>  | bi  | 1 | <a href="#">2725</a> | bi  | 1 | <a href="#">2330</a> | bi  | 1 | <a href="#">2548</a> |
| 1 | <a href="#">2915</a> | 719  | bi  | 1 | <a href="#">189</a>  | bi  | 1 | <a href="#">2726</a> | bi  | 1 | <a href="#">2331</a> | bi  | 1 | <a href="#">2549</a> |
| 1 | <a href="#">2916</a> | 250  | bi  | 1 | <a href="#">190</a>  | bi  | 1 | <a href="#">2727</a> | bi  | 1 | <a href="#">2332</a> | bi  | 1 | <a href="#">2550</a> |
| 1 | <a href="#">2917</a> | 460  | bi  | 1 | <a href="#">191</a>  | bi  | 1 | <a href="#">2728</a> | bi  | 1 | <a href="#">2333</a> | bi  | 1 | <a href="#">2551</a> |

|   |                      |     |     |   |                     |     |   |                      |     |   |                      |     |   |                      |
|---|----------------------|-----|-----|---|---------------------|-----|---|----------------------|-----|---|----------------------|-----|---|----------------------|
| 1 | <a href="#">2918</a> | 314 | bi  | 1 | <a href="#">192</a> | bi  | 1 | <a href="#">2729</a> | bi  | 1 | <a href="#">2334</a> | bi  | 1 | <a href="#">2552</a> |
| 1 | <a href="#">3354</a> | 109 | bi  | 1 | <a href="#">193</a> | bi  | 1 | <a href="#">2730</a> | bi  | 1 | <a href="#">2335</a> | bi  | 1 | <a href="#">2553</a> |
| 1 | <a href="#">2919</a> | 811 | bi  | 1 | <a href="#">194</a> | bi  | 1 | <a href="#">2731</a> | bi  | 1 | <a href="#">2336</a> | bi  | 1 | <a href="#">2554</a> |
| 1 | <a href="#">2920</a> | 100 | bi  | 1 | <a href="#">195</a> | bi  | 1 | <a href="#">2732</a> | bi  | 1 | <a href="#">2337</a> | bi  | 1 | <a href="#">2555</a> |
| 1 | <a href="#">2921</a> | 205 | bi  | 1 | <a href="#">196</a> | bi  | 1 | <a href="#">2733</a> | bi  | 1 | <a href="#">2338</a> | bi  | 1 | <a href="#">2556</a> |
| 1 | <a href="#">2922</a> | 494 | bi  | 1 | <a href="#">197</a> | bi  | 1 | <a href="#">2734</a> | bi  | 1 | <a href="#">2339</a> | bi  | 1 | <a href="#">2557</a> |
| 1 | <a href="#">2923</a> | 102 | bi  | 1 | <a href="#">198</a> | bi  | 1 | <a href="#">2735</a> | bi  | 1 | <a href="#">2340</a> | bi  | 1 | <a href="#">2558</a> |
| 1 | <a href="#">2924</a> | 295 | bi  | 1 | <a href="#">199</a> | bi  | 1 | <a href="#">2736</a> | bi  | 1 | <a href="#">2341</a> | bi  | 1 | <a href="#">2559</a> |
| 1 | <a href="#">2925</a> | 73  | bi  | 1 | <a href="#">200</a> | bi  | 1 | <a href="#">2737</a> | bi  | 1 | <a href="#">2342</a> | bi  | 1 | <a href="#">2560</a> |
| 1 | <a href="#">2926</a> | 157 | bi  | 1 | <a href="#">202</a> | bi  | 1 | <a href="#">2738</a> | bi  | 1 | <a href="#">2343</a> | bi  | 1 | <a href="#">2561</a> |
| 1 | <a href="#">2927</a> | 218 | bi  | 1 | <a href="#">203</a> | bi  | 1 | <a href="#">2739</a> | bi  | 1 | <a href="#">2344</a> | bi  | 1 | <a href="#">2562</a> |
| 1 | <a href="#">2928</a> | 358 | bi  | 1 | <a href="#">204</a> | bi  | 1 | <a href="#">2740</a> | bi  | 1 | <a href="#">2345</a> | bi  | 1 | <a href="#">2563</a> |
| 1 | <a href="#">2929</a> | 151 | bi  | 1 | <a href="#">205</a> | bi  | 1 | <a href="#">2741</a> | bi  | 1 | <a href="#">2346</a> | bi  | 1 | <a href="#">2564</a> |
| 1 | <a href="#">2930</a> | 169 | bi  | 1 | <a href="#">206</a> | bi  | 1 | <a href="#">2742</a> | bi  | 1 | <a href="#">2347</a> | bi  | 1 | <a href="#">2565</a> |
| 1 | <a href="#">2931</a> | 291 | bi  | 1 | <a href="#">207</a> | bi  | 1 | <a href="#">2743</a> | bi  | 1 | <a href="#">2348</a> | bi  | 1 | <a href="#">2566</a> |
| 1 | <a href="#">2932</a> | 279 | bi  | 1 | <a href="#">208</a> | bi  | 1 | <a href="#">2744</a> | bi  | 1 | <a href="#">2349</a> | bi  | 1 | <a href="#">2567</a> |
| 1 | <a href="#">2933</a> | 369 | bi  | 1 | <a href="#">209</a> | bi  | 1 | <a href="#">2745</a> | bi  | 1 | <a href="#">2350</a> | bi  | 1 | <a href="#">2568</a> |
| 1 | <a href="#">2934</a> | 334 | bi  | 1 | <a href="#">210</a> | bi  | 1 | <a href="#">2746</a> | bi  | 1 | <a href="#">2351</a> | bi  | 1 | <a href="#">2569</a> |
| 1 | <a href="#">2935</a> | 300 | bi  | 1 | <a href="#">211</a> | bi  | 1 | <a href="#">2747</a> | bi  | 1 | <a href="#">2352</a> | bi  | 1 | <a href="#">2570</a> |
| 1 | <a href="#">2936</a> | 296 | bi  | 1 | <a href="#">212</a> | bi  | 1 | <a href="#">2748</a> | bi  | 1 | <a href="#">2353</a> | bi  | 1 | <a href="#">2571</a> |
| 1 | <a href="#">2937</a> | 151 | -   |   |                     | -   |   |                      | -   |   |                      | -   |   |                      |
| 1 | <a href="#">2938</a> | 239 | bi  | 1 | <a href="#">213</a> | bi  | 1 | <a href="#">2749</a> | bi  | 1 | <a href="#">2354</a> | uni | 1 | <a href="#">2585</a> |
| 1 | <a href="#">2939</a> | 193 | bi  | 1 | <a href="#">214</a> | bi  | 1 | <a href="#">2750</a> | bi  | 1 | <a href="#">2355</a> | bi  | 1 | <a href="#">2574</a> |
| 1 | <a href="#">2940</a> | 289 | bi  | 1 | <a href="#">221</a> | bi  | 1 | <a href="#">2757</a> | bi  | 1 | <a href="#">2362</a> | bi  | 1 | <a href="#">2576</a> |
| 1 | <a href="#">2941</a> | 435 | bi  | 1 | <a href="#">222</a> | bi  | 1 | <a href="#">2758</a> | bi  | 1 | <a href="#">2363</a> | bi  | 1 | <a href="#">2577</a> |
| 1 | <a href="#">2942</a> | 423 | bi  | 1 | <a href="#">223</a> | bi  | 1 | <a href="#">2759</a> | bi  | 1 | <a href="#">2364</a> | bi  | 1 | <a href="#">2578</a> |
| 1 | <a href="#">2943</a> | 150 | bi  | 1 | <a href="#">224</a> | bi  | 1 | <a href="#">2760</a> | bi  | 1 | <a href="#">2365</a> | bi  | 1 | <a href="#">2579</a> |
| 1 | <a href="#">2944</a> | 239 | uni | 1 | <a href="#">226</a> | uni | 1 | <a href="#">2761</a> | uni | 1 | <a href="#">2367</a> | uni | 1 | <a href="#">2581</a> |
| 1 | <a href="#">2945</a> | 237 | bi  | 1 | <a href="#">226</a> | bi  | 1 | <a href="#">2761</a> | bi  | 1 | <a href="#">2367</a> | bi  | 1 | <a href="#">2581</a> |
| 1 | <a href="#">2946</a> | 233 | bi  | 1 | <a href="#">225</a> | uni | 1 | <a href="#">2761</a> | bi  | 1 | <a href="#">2366</a> | uni | 1 | <a href="#">2581</a> |
| 1 | <a href="#">2947</a> | 238 | bi  | 1 | <a href="#">227</a> | bi  | 1 | <a href="#">2762</a> | bi  | 1 | <a href="#">2368</a> | bi  | 1 | <a href="#">2582</a> |
| 1 | <a href="#">2948</a> | 779 | bi  | 1 | <a href="#">228</a> | bi  | 1 | <a href="#">2764</a> | bi  | 1 | <a href="#">2369</a> | bi  | 1 | <a href="#">2583</a> |
| 1 | <a href="#">2949</a> | 217 | bi  | 1 | <a href="#">229</a> | bi  | 1 | <a href="#">2765</a> | bi  | 1 | <a href="#">2370</a> | bi  | 1 | <a href="#">2584</a> |
| 1 | <a href="#">2950</a> | 148 | bi  | 1 | <a href="#">230</a> | uni | 1 | <a href="#">2749</a> | bi  | 1 | <a href="#">2371</a> | bi  | 1 | <a href="#">2585</a> |
| 1 | <a href="#">2951</a> | 134 | -   |   |                     | -   |   |                      | -   |   |                      | -   |   |                      |
| 1 | <a href="#">2952</a> | 324 | bi  | 1 | <a href="#">233</a> | bi  | 1 | <a href="#">2767</a> | bi  | 1 | <a href="#">2373</a> | bi  | 1 | <a href="#">2587</a> |
| 1 | <a href="#">2953</a> | 146 | bi  | 1 | <a href="#">234</a> | bi  | 1 | <a href="#">2768</a> | bi  | 1 | <a href="#">2374</a> | bi  | 1 | <a href="#">2588</a> |
| 1 | <a href="#">2954</a> | 185 | bi  | 1 | <a href="#">235</a> | bi  | 1 | <a href="#">2769</a> | bi  | 1 | <a href="#">2375</a> | bi  | 1 | <a href="#">2589</a> |
| 1 | <a href="#">2955</a> | 711 | bi  | 1 | <a href="#">236</a> | bi  | 1 | <a href="#">2770</a> | bi  | 1 | <a href="#">2376</a> | bi  | 1 | <a href="#">2590</a> |
| 1 | <a href="#">2956</a> | 859 | bi  | 1 | <a href="#">237</a> | bi  | 1 | <a href="#">2771</a> | bi  | 1 | <a href="#">2377</a> | bi  | 1 | <a href="#">2591</a> |
| 1 | <a href="#">2957</a> | 124 | bi  | 1 | <a href="#">238</a> | bi  | 1 | <a href="#">2772</a> | bi  | 1 | <a href="#">2378</a> | bi  | 1 | <a href="#">2592</a> |
| 1 | <a href="#">2958</a> | 266 | bi  | 1 | <a href="#">239</a> | bi  | 1 | <a href="#">2773</a> | bi  | 1 | <a href="#">2379</a> | bi  | 1 | <a href="#">2593</a> |
| 1 | <a href="#">2959</a> | 519 | bi  | 1 | <a href="#">240</a> | bi  | 1 | <a href="#">2774</a> | bi  | 1 | <a href="#">2380</a> | bi  | 1 | <a href="#">2594</a> |
| 1 | <a href="#">2960</a> | 349 | bi  | 1 | <a href="#">242</a> | bi  | 1 | <a href="#">2775</a> | bi  | 1 | <a href="#">2381</a> | bi  | 1 | <a href="#">2595</a> |
| 1 | <a href="#">2961</a> | 415 | bi  | 1 | <a href="#">243</a> | bi  | 1 | <a href="#">2776</a> | bi  | 1 | <a href="#">2382</a> | bi  | 1 | <a href="#">2596</a> |
| 1 | <a href="#">2962</a> | 402 | bi  | 1 | <a href="#">244</a> | bi  | 1 | <a href="#">2777</a> | bi  | 1 | <a href="#">2383</a> | bi  | 1 | <a href="#">2597</a> |
| 1 | <a href="#">2963</a> | 207 | bi  | 1 | <a href="#">245</a> | bi  | 1 | <a href="#">2778</a> | bi  | 1 | <a href="#">2384</a> | bi  | 1 | <a href="#">2598</a> |
| 1 | <a href="#">2964</a> | 142 | bi  | 1 | <a href="#">246</a> | bi  | 1 | <a href="#">2779</a> | bi  | 1 | <a href="#">2385</a> | bi  | 1 | <a href="#">2599</a> |
| 1 | <a href="#">2965</a> | 128 | bi  | 1 | <a href="#">247</a> | bi  | 1 | <a href="#">2780</a> | bi  | 1 | <a href="#">2386</a> | bi  | 1 | <a href="#">2600</a> |
| 1 | <a href="#">2966</a> | 264 | bi  | 1 | <a href="#">248</a> | bi  | 1 | <a href="#">2781</a> | bi  | 1 | <a href="#">2387</a> | bi  | 1 | <a href="#">2601</a> |
| 1 | <a href="#">2967</a> | 379 | bi  | 1 | <a href="#">249</a> | bi  | 1 | <a href="#">2782</a> | bi  | 1 | <a href="#">2388</a> | bi  | 1 | <a href="#">2602</a> |
| 1 | <a href="#">2968</a> | 295 | bi  | 1 | <a href="#">250</a> | bi  | 1 | <a href="#">2783</a> | bi  | 1 | <a href="#">2389</a> | bi  | 1 | <a href="#">2603</a> |
| 1 | <a href="#">2969</a> | 166 | bi  | 1 | <a href="#">251</a> | bi  | 1 | <a href="#">2784</a> | bi  | 1 | <a href="#">2390</a> | bi  | 1 | <a href="#">2604</a> |
| 1 | <a href="#">2970</a> | 484 | bi  | 1 | <a href="#">252</a> | bi  | 1 | <a href="#">2785</a> | bi  | 1 | <a href="#">2392</a> | bi  | 1 | <a href="#">2605</a> |
| 1 | <a href="#">2971</a> | 162 | bi  | 1 | <a href="#">253</a> | bi  | 1 | <a href="#">2786</a> | bi  | 1 | <a href="#">2393</a> | bi  | 1 | <a href="#">2606</a> |
| 1 | <a href="#">2972</a> | 359 | bi  | 1 | <a href="#">254</a> | bi  | 1 | <a href="#">2787</a> | bi  | 1 | <a href="#">2394</a> | bi  | 1 | <a href="#">2607</a> |
| 1 | <a href="#">2973</a> | 253 | bi  | 1 | <a href="#">255</a> | bi  | 1 | <a href="#">2788</a> | bi  | 1 | <a href="#">2395</a> | bi  | 1 | <a href="#">2608</a> |



|   |                      |      |     |   |                      |     |   |                      |     |   |                      |     |   |                      |
|---|----------------------|------|-----|---|----------------------|-----|---|----------------------|-----|---|----------------------|-----|---|----------------------|
| 1 | <a href="#">2974</a> | 267  | bi  | 1 | <a href="#">256</a>  | bi  | 1 | <a href="#">2789</a> | bi  | 1 | <a href="#">2396</a> | bi  | 1 | <a href="#">2609</a> |
| 1 | <a href="#">2975</a> | 245  | bi  | 1 | <a href="#">257</a>  | bi  | 1 | <a href="#">2790</a> | bi  | 1 | <a href="#">2397</a> | bi  | 1 | <a href="#">2610</a> |
| 1 | <a href="#">2976</a> | 130  | uni | 1 | <a href="#">2782</a> | uni | 1 | <a href="#">2326</a> | uni | 1 | <a href="#">2001</a> | uni | 1 | <a href="#">2155</a> |
| 1 | <a href="#">2977</a> | 1555 | bi  | 1 | <a href="#">259</a>  | bi  | 1 | <a href="#">2792</a> | bi  | 1 | <a href="#">2399</a> | bi  | 1 | <a href="#">2612</a> |
| 1 | <a href="#">2978</a> | 45   | -   |   |                      | -   |   |                      | -   |   |                      | -   |   |                      |
| 1 | <a href="#">2979</a> | 338  | bi  | 1 | <a href="#">260</a>  | bi  | 1 | <a href="#">2794</a> | bi  | 1 | <a href="#">2400</a> | bi  | 1 | <a href="#">2614</a> |
| 1 | <a href="#">2980</a> | 182  | bi  | 1 | <a href="#">261</a>  | bi  | 1 | <a href="#">2795</a> | bi  | 1 | <a href="#">2401</a> | bi  | 1 | <a href="#">2615</a> |
| 1 | <a href="#">2981</a> | 228  | bi  | 1 | <a href="#">262</a>  | bi  | 1 | <a href="#">2796</a> | bi  | 1 | <a href="#">2402</a> | bi  | 1 | <a href="#">2616</a> |
| 1 | <a href="#">2982</a> | 140  | bi  | 1 | <a href="#">263</a>  | bi  | 1 | <a href="#">2797</a> | bi  | 1 | <a href="#">2403</a> | bi  | 1 | <a href="#">2617</a> |
| 1 | <a href="#">2983</a> | 243  | bi  | 1 | <a href="#">264</a>  | bi  | 1 | <a href="#">2798</a> | bi  | 1 | <a href="#">2404</a> | bi  | 1 | <a href="#">2618</a> |
| 1 | <a href="#">2984</a> | 590  | bi  | 1 | <a href="#">265</a>  | bi  | 1 | <a href="#">2799</a> | bi  | 1 | <a href="#">2405</a> | bi  | 1 | <a href="#">2619</a> |
| 1 | <a href="#">2985</a> | 273  | bi  | 1 | <a href="#">266</a>  | bi  | 1 | <a href="#">2800</a> | bi  | 1 | <a href="#">2406</a> | bi  | 1 | <a href="#">2620</a> |
| 1 | <a href="#">2986</a> | 224  | bi  | 1 | <a href="#">267</a>  | bi  | 1 | <a href="#">2801</a> | bi  | 1 | <a href="#">2407</a> | bi  | 1 | <a href="#">2621</a> |
| 1 | <a href="#">2987</a> | 241  | bi  | 1 | <a href="#">268</a>  | bi  | 1 | <a href="#">2802</a> | bi  | 1 | <a href="#">2408</a> | bi  | 1 | <a href="#">2622</a> |
| 1 | <a href="#">2988</a> | 131  | bi  | 1 | <a href="#">269</a>  | bi  | 1 | <a href="#">2803</a> | bi  | 1 | <a href="#">2409</a> | bi  | 1 | <a href="#">2623</a> |
| 1 | <a href="#">2989</a> | 90   | bi  | 1 | <a href="#">270</a>  | bi  | 1 | <a href="#">2804</a> | bi  | 1 | <a href="#">2410</a> | bi  | 1 | <a href="#">2624</a> |
| 1 | <a href="#">2990</a> | 50   | bi  | 1 | <a href="#">271</a>  | bi  | 1 | <a href="#">2805</a> | bi  | 1 | <a href="#">2411</a> | bi  | 1 | <a href="#">2625</a> |
| 1 | <a href="#">2991</a> | 325  | bi  | 1 | <a href="#">272</a>  | bi  | 1 | <a href="#">2806</a> | bi  | 1 | <a href="#">2412</a> | bi  | 1 | <a href="#">2626</a> |
| 1 | <a href="#">2992</a> | 47   | bi  | 1 | <a href="#">273</a>  | bi  | 1 | <a href="#">2807</a> | bi  | 1 | <a href="#">2413</a> | bi  | 1 | <a href="#">2627</a> |
| 1 | <a href="#">2993</a> | 512  | bi  | 1 | <a href="#">274</a>  | bi  | 1 | <a href="#">2808</a> | bi  | 1 | <a href="#">2414</a> | bi  | 1 | <a href="#">2628</a> |
| 1 | <a href="#">2994</a> | 325  | bi  | 1 | <a href="#">275</a>  | bi  | 1 | <a href="#">2809</a> | bi  | 1 | <a href="#">2415</a> | bi  | 1 | <a href="#">2629</a> |
| 1 | <a href="#">2995</a> | 257  | bi  | 1 | <a href="#">276</a>  | bi  | 1 | <a href="#">2810</a> | bi  | 1 | <a href="#">2416</a> | bi  | 1 | <a href="#">2630</a> |
| 1 | <a href="#">2996</a> | 312  | bi  | 1 | <a href="#">277</a>  | bi  | 1 | <a href="#">2811</a> | bi  | 1 | <a href="#">2417</a> | bi  | 1 | <a href="#">2631</a> |
| 1 | <a href="#">2997</a> | 140  | bi  | 1 | <a href="#">278</a>  | bi  | 1 | <a href="#">2812</a> | bi  | 1 | <a href="#">2418</a> | bi  | 1 | <a href="#">2632</a> |
| 1 | <a href="#">2998</a> | 164  | bi  | 1 | <a href="#">279</a>  | bi  | 1 | <a href="#">2813</a> | bi  | 1 | <a href="#">2419</a> | bi  | 1 | <a href="#">2633</a> |
| 1 | <a href="#">2999</a> | 272  | bi  | 1 | <a href="#">280</a>  | bi  | 1 | <a href="#">2814</a> | bi  | 1 | <a href="#">2420</a> | bi  | 1 | <a href="#">2634</a> |
| 1 | <a href="#">3000</a> | 276  | bi  | 1 | <a href="#">281</a>  | bi  | 1 | <a href="#">2815</a> | bi  | 1 | <a href="#">2421</a> | bi  | 1 | <a href="#">2635</a> |
| 1 | <a href="#">3001</a> | 404  | uni | 1 | <a href="#">282</a>  | uni | 1 | <a href="#">2816</a> | uni | 1 | <a href="#">2422</a> | bi  | 1 | <a href="#">2636</a> |
| 1 | <a href="#">3002</a> | 391  | uni | 1 | <a href="#">2146</a> | -   |   |                      | -   |   |                      | uni | 1 | <a href="#">1007</a> |
| 1 | <a href="#">3003</a> | 427  | bi  | 1 | <a href="#">282</a>  | bi  | 1 | <a href="#">2816</a> | bi  | 1 | <a href="#">2422</a> | bi  | 1 | <a href="#">2637</a> |
| 1 | <a href="#">3004</a> | 965  | -   |   |                      | -   |   |                      | -   |   |                      | -   |   |                      |
| 1 | <a href="#">3005</a> | 139  | -   |   |                      | -   |   |                      | -   |   |                      | -   |   |                      |
| 1 | <a href="#">3006</a> | 1211 | -   |   |                      | -   |   |                      | -   |   |                      | -   |   |                      |
| 1 | <a href="#">3007</a> | 77   | -   |   |                      | bi  | 1 | <a href="#">920</a>  | -   |   |                      | -   |   |                      |
| 1 | <a href="#">3008</a> | 103  | -   |   |                      | -   |   |                      | -   |   |                      | -   |   |                      |
| 1 | <a href="#">3009</a> | 255  | bi  | 1 | <a href="#">2549</a> | uni | 1 | <a href="#">694</a>  | uni | 1 | <a href="#">584</a>  | uni | 1 | <a href="#">698</a>  |
| 1 | <a href="#">3010</a> | 110  | -   |   |                      | -   |   |                      | -   |   |                      | -   |   |                      |
| 1 | <a href="#">3011</a> | 168  | -   |   |                      | -   |   |                      | -   |   |                      | -   |   |                      |
| 1 | <a href="#">3012</a> | 278  | -   |   |                      | -   |   |                      | -   |   |                      | -   |   |                      |
| 1 | <a href="#">3013</a> | 91   | -   |   |                      | uni | 1 | <a href="#">2481</a> | -   |   |                      | -   |   |                      |
| 1 | <a href="#">3355</a> | 190  | -   |   |                      | -   |   |                      | -   |   |                      | -   |   |                      |
| 1 | <a href="#">3356</a> | 125  | uni | 1 | <a href="#">1314</a> | -   |   |                      | -   |   |                      | uni | 1 | <a href="#">1546</a> |
| 1 | <a href="#">3014</a> | 131  | bi  | 1 | <a href="#">288</a>  | bi  | 1 | <a href="#">2819</a> | bi  | 1 | <a href="#">2427</a> | bi  | 1 | <a href="#">2644</a> |
| 1 | <a href="#">3357</a> | 117  | bi  | 1 | <a href="#">289</a>  | bi  | 1 | <a href="#">2820</a> | bi  | 1 | <a href="#">2428</a> | bi  | 1 | <a href="#">2645</a> |
| 1 | <a href="#">3015</a> | 36   | -   |   |                      | -   |   |                      | -   |   |                      | -   |   |                      |
| 1 | <a href="#">3016</a> | 156  | bi  | 1 | <a href="#">290</a>  | bi  | 1 | <a href="#">2821</a> | bi  | 1 | <a href="#">2429</a> | bi  | 1 | <a href="#">2646</a> |
| 1 | <a href="#">3017</a> | 240  | bi  | 1 | <a href="#">291</a>  | bi  | 1 | <a href="#">2822</a> | bi  | 1 | <a href="#">2430</a> | bi  | 1 | <a href="#">2647</a> |
| 1 | <a href="#">3018</a> | 507  | bi  | 1 | <a href="#">292</a>  | bi  | 1 | <a href="#">2823</a> | bi  | 1 | <a href="#">2431</a> | bi  | 1 | <a href="#">2648</a> |
| 1 | <a href="#">3019</a> | 231  | bi  | 1 | <a href="#">293</a>  | bi  | 1 | <a href="#">2824</a> | bi  | 1 | <a href="#">2432</a> | bi  | 1 | <a href="#">2649</a> |
| 1 | <a href="#">3020</a> | 1218 | bi  | 1 | <a href="#">294</a>  | bi  | 1 | <a href="#">2825</a> | bi  | 1 | <a href="#">2433</a> | bi  | 1 | <a href="#">2650</a> |
| 1 | <a href="#">3021</a> | 1208 | bi  | 1 | <a href="#">295</a>  | bi  | 1 | <a href="#">2826</a> | bi  | 1 | <a href="#">2434</a> | bi  | 1 | <a href="#">2651</a> |
| 1 | <a href="#">3022</a> | 72   | bi  | 1 | <a href="#">299</a>  | bi  | 1 | <a href="#">2829</a> | bi  | 1 | <a href="#">2437</a> | bi  | 1 | <a href="#">2655</a> |
| 1 | <a href="#">3023</a> | 331  | bi  | 1 | <a href="#">300</a>  | bi  | 1 | <a href="#">2830</a> | bi  | 1 | <a href="#">2438</a> | bi  | 1 | <a href="#">2656</a> |
| 1 | <a href="#">3024</a> | 211  | -   |   |                      | -   |   |                      | -   |   |                      | -   |   |                      |
| 1 | <a href="#">3025</a> | 432  | -   |   |                      | -   |   |                      | -   |   |                      | -   |   |                      |
| 1 | <a href="#">3026</a> | 45   | -   |   |                      | -   |   |                      | -   |   |                      | -   |   |                      |
| 1 | <a href="#">3027</a> | 31   | -   |   |                      | -   |   |                      | -   |   |                      | -   |   |                      |

|   |                      |      |     |   |                     |     |   |                      |     |   |                      |     |   |                      |
|---|----------------------|------|-----|---|---------------------|-----|---|----------------------|-----|---|----------------------|-----|---|----------------------|
| 1 | <a href="#">3028</a> | 539  | bi  | 1 | <a href="#">302</a> | bi  | 1 | <a href="#">2832</a> | bi  | 1 | <a href="#">2440</a> | bi  | 1 | <a href="#">2658</a> |
| 1 | <a href="#">3029</a> | 66   | bi  | 1 | <a href="#">231</a> | -   |   |                      | -   |   |                      | bi  | 1 | <a href="#">2659</a> |
| 1 | <a href="#">3030</a> | 1253 | uni | 1 | <a href="#">306</a> | uni | 1 | <a href="#">2834</a> | uni | 1 | <a href="#">2442</a> | uni | 1 | <a href="#">274</a>  |
| 1 | <a href="#">3031</a> | 48   | bi  | 1 | <a href="#">305</a> | bi  | 1 | <a href="#">2833</a> | uni | 1 | <a href="#">2303</a> | bi  | 1 | <a href="#">2660</a> |
| 1 | <a href="#">3032</a> | 646  | bi  | 1 | <a href="#">306</a> | bi  | 1 | <a href="#">2834</a> | bi  | 1 | <a href="#">2442</a> | bi  | 1 | <a href="#">2661</a> |
| 1 | <a href="#">3033</a> | 312  | uni | 1 | <a href="#">307</a> | uni | 1 | <a href="#">2835</a> | uni | 1 | <a href="#">2443</a> | uni | 1 | <a href="#">2661</a> |
| 1 | <a href="#">3034</a> | 1266 | bi  | 1 | <a href="#">307</a> | uni | 1 | <a href="#">2685</a> | bi  | 1 | <a href="#">2443</a> | uni | 1 | <a href="#">2508</a> |
| 1 | <a href="#">3035</a> | 121  | bi  | 1 | <a href="#">309</a> | bi  | 1 | <a href="#">2837</a> | bi  | 1 | <a href="#">2445</a> | bi  | 1 | <a href="#">2662</a> |
| 1 | <a href="#">3036</a> | 316  | bi  | 1 | <a href="#">310</a> | bi  | 1 | <a href="#">2838</a> | bi  | 1 | <a href="#">2446</a> | bi  | 1 | <a href="#">2663</a> |
| 1 | <a href="#">3037</a> | 356  | bi  | 1 | <a href="#">311</a> | bi  | 1 | <a href="#">2839</a> | bi  | 1 | <a href="#">2447</a> | bi  | 1 | <a href="#">2664</a> |
| 1 | <a href="#">3038</a> | 310  | bi  | 1 | <a href="#">312</a> | bi  | 1 | <a href="#">2840</a> | bi  | 1 | <a href="#">2448</a> | bi  | 1 | <a href="#">2665</a> |
| 1 | <a href="#">3039</a> | 649  | bi  | 1 | <a href="#">313</a> | bi  | 1 | <a href="#">2841</a> | bi  | 1 | <a href="#">2449</a> | bi  | 1 | <a href="#">2666</a> |
| 1 | <a href="#">3040</a> | 141  | bi  | 1 | <a href="#">314</a> | bi  | 1 | <a href="#">2842</a> | bi  | 1 | <a href="#">2450</a> | bi  | 1 | <a href="#">2667</a> |
| 1 | <a href="#">3041</a> | 186  | bi  | 1 | <a href="#">315</a> | bi  | 1 | <a href="#">2843</a> | bi  | 1 | <a href="#">2451</a> | bi  | 1 | <a href="#">2668</a> |
| 1 | <a href="#">3042</a> | 329  | bi  | 1 | <a href="#">316</a> | bi  | 1 | <a href="#">2844</a> | bi  | 1 | <a href="#">2452</a> | bi  | 1 | <a href="#">2669</a> |
| 1 | <a href="#">3043</a> | 77   | bi  | 1 | <a href="#">317</a> | bi  | 1 | <a href="#">2845</a> | bi  | 1 | <a href="#">2436</a> | bi  | 1 | <a href="#">2653</a> |
| 1 | <a href="#">3044</a> | 122  | bi  | 1 | <a href="#">318</a> | bi  | 1 | <a href="#">2846</a> | bi  | 1 | <a href="#">2435</a> | bi  | 1 | <a href="#">2652</a> |
| 1 | <a href="#">3045</a> | 28   | -   |   |                     | -   |   |                      | -   |   |                      | -   |   |                      |
| 1 | <a href="#">3046</a> | 34   | -   |   |                     | -   |   |                      | -   |   |                      | -   |   |                      |
| 1 | <a href="#">3047</a> | 264  | bi  | 1 | <a href="#">319</a> | bi  | 1 | <a href="#">2847</a> | bi  | 1 | <a href="#">2453</a> | bi  | 1 | <a href="#">2670</a> |
| 1 | <a href="#">3048</a> | 198  | bi  | 1 | <a href="#">320</a> | bi  | 1 | <a href="#">2848</a> | bi  | 1 | <a href="#">2454</a> | bi  | 1 | <a href="#">2671</a> |
| 1 | <a href="#">3049</a> | 187  | bi  | 1 | <a href="#">321</a> | bi  | 1 | <a href="#">2849</a> | bi  | 1 | <a href="#">2455</a> | bi  | 1 | <a href="#">2672</a> |
| 1 | <a href="#">3050</a> | 162  | bi  | 1 | <a href="#">322</a> | bi  | 1 | <a href="#">2850</a> | bi  | 1 | <a href="#">2456</a> | bi  | 1 | <a href="#">2673</a> |
| 1 | <a href="#">3051</a> | 121  | bi  | 1 | <a href="#">323</a> | bi  | 1 | <a href="#">2851</a> | bi  | 1 | <a href="#">2457</a> | bi  | 1 | <a href="#">2674</a> |
| 1 | <a href="#">3052</a> | 450  | bi  | 1 | <a href="#">324</a> | bi  | 1 | <a href="#">2862</a> | bi  | 1 | <a href="#">2458</a> | bi  | 1 | <a href="#">2676</a> |
| 1 | <a href="#">3053</a> | 133  | bi  | 1 | <a href="#">325</a> | bi  | 1 | <a href="#">2863</a> | bi  | 1 | <a href="#">2459</a> | bi  | 1 | <a href="#">2677</a> |
| 1 | <a href="#">3054</a> | 380  | bi  | 1 | <a href="#">326</a> | -   |   |                      | bi  | 1 | <a href="#">2460</a> | -   |   |                      |
| 1 | <a href="#">3055</a> | 158  | uni | 1 | <a href="#">327</a> | -   |   |                      | uni | 1 | <a href="#">2461</a> | -   |   |                      |
| 1 | <a href="#">3056</a> | 64   | bi  | 1 | <a href="#">327</a> | -   |   |                      | bi  | 1 | <a href="#">2461</a> | -   |   |                      |
| 1 | <a href="#">3057</a> | 518  | bi  | 1 | <a href="#">328</a> | bi  | 1 | <a href="#">2864</a> | bi  | 1 | <a href="#">2462</a> | bi  | 1 | <a href="#">2678</a> |
| 1 | <a href="#">3058</a> | 365  | bi  | 1 | <a href="#">329</a> | bi  | 1 | <a href="#">2865</a> | bi  | 1 | <a href="#">2463</a> | bi  | 1 | <a href="#">2679</a> |
| 1 | <a href="#">3059</a> | 423  | bi  | 1 | <a href="#">330</a> | bi  | 1 | <a href="#">2866</a> | bi  | 1 | <a href="#">2464</a> | bi  | 1 | <a href="#">2680</a> |
| 1 | <a href="#">3060</a> | 521  | bi  | 1 | <a href="#">331</a> | bi  | 1 | <a href="#">2867</a> | bi  | 1 | <a href="#">2465</a> | bi  | 1 | <a href="#">2681</a> |
| 1 | <a href="#">3061</a> | 416  | bi  | 1 | <a href="#">332</a> | bi  | 1 | <a href="#">2868</a> | bi  | 1 | <a href="#">2466</a> | bi  | 1 | <a href="#">2682</a> |
| 1 | <a href="#">3062</a> | 307  | bi  | 1 | <a href="#">333</a> | bi  | 1 | <a href="#">2869</a> | bi  | 1 | <a href="#">2467</a> | bi  | 1 | <a href="#">2683</a> |
| 1 | <a href="#">3063</a> | 337  | bi  | 1 | <a href="#">334</a> | bi  | 1 | <a href="#">2870</a> | bi  | 1 | <a href="#">2468</a> | bi  | 1 | <a href="#">2684</a> |
| 1 | <a href="#">3064</a> | 832  | bi  | 1 | <a href="#">335</a> | bi  | 1 | <a href="#">2871</a> | bi  | 1 | <a href="#">2469</a> | bi  | 1 | <a href="#">2685</a> |
| 1 | <a href="#">3065</a> | 156  | bi  | 1 | <a href="#">336</a> | bi  | 1 | <a href="#">2872</a> | bi  | 1 | <a href="#">2470</a> | bi  | 1 | <a href="#">2686</a> |
| 1 | <a href="#">3066</a> | 396  | bi  | 1 | <a href="#">337</a> | bi  | 1 | <a href="#">2873</a> | bi  | 1 | <a href="#">2471</a> | bi  | 1 | <a href="#">2687</a> |
| 1 | <a href="#">3067</a> | 436  | bi  | 1 | <a href="#">338</a> | bi  | 1 | <a href="#">2874</a> | bi  | 1 | <a href="#">2472</a> | bi  | 1 | <a href="#">2688</a> |
| 1 | <a href="#">3068</a> | 286  | bi  | 1 | <a href="#">339</a> | bi  | 1 | <a href="#">2875</a> | bi  | 1 | <a href="#">2473</a> | bi  | 1 | <a href="#">2689</a> |
| 1 | <a href="#">3069</a> | 28   | -   |   |                     | -   |   |                      | -   |   |                      | -   |   |                      |
| 1 | <a href="#">3070</a> | 230  | bi  | 1 | <a href="#">341</a> | bi  | 1 | <a href="#">2877</a> | bi  | 1 | <a href="#">2474</a> | bi  | 1 | <a href="#">2690</a> |
| 1 | <a href="#">3071</a> | 394  | bi  | 1 | <a href="#">342</a> | bi  | 1 | <a href="#">2878</a> | bi  | 1 | <a href="#">2475</a> | bi  | 1 | <a href="#">2691</a> |
| 1 | <a href="#">3072</a> | 424  | bi  | 1 | <a href="#">343</a> | bi  | 1 | <a href="#">2879</a> | bi  | 1 | <a href="#">2476</a> | bi  | 1 | <a href="#">2692</a> |
| 1 | <a href="#">3073</a> | 494  | bi  | 1 | <a href="#">344</a> | bi  | 1 | <a href="#">2880</a> | bi  | 1 | <a href="#">2477</a> | bi  | 1 | <a href="#">2694</a> |
| 1 | <a href="#">3074</a> | 561  | bi  | 1 | <a href="#">345</a> | bi  | 1 | <a href="#">2881</a> | bi  | 1 | <a href="#">2478</a> | bi  | 1 | <a href="#">2695</a> |
| 1 | <a href="#">3075</a> | 230  | bi  | 1 | <a href="#">346</a> | bi  | 1 | <a href="#">2882</a> | bi  | 1 | <a href="#">2479</a> | bi  | 1 | <a href="#">2696</a> |
| 1 | <a href="#">3076</a> | 372  | bi  | 1 | <a href="#">347</a> | bi  | 1 | <a href="#">2883</a> | bi  | 1 | <a href="#">2480</a> | bi  | 1 | <a href="#">2697</a> |
| 1 | <a href="#">3077</a> | 62   | bi  | 1 | <a href="#">348</a> | bi  | 1 | <a href="#">2884</a> | bi  | 1 | <a href="#">2481</a> | bi  | 1 | <a href="#">2698</a> |
| 1 | <a href="#">3078</a> | 297  | bi  | 1 | <a href="#">349</a> | bi  | 1 | <a href="#">2885</a> | bi  | 1 | <a href="#">2482</a> | bi  | 1 | <a href="#">2699</a> |
| 1 | <a href="#">3079</a> | 254  | bi  | 1 | <a href="#">350</a> | bi  | 1 | <a href="#">2886</a> | bi  | 1 | <a href="#">2483</a> | bi  | 1 | <a href="#">2700</a> |
| 1 | <a href="#">3080</a> | 239  | bi  | 1 | <a href="#">351</a> | bi  | 1 | <a href="#">2887</a> | bi  | 1 | <a href="#">2484</a> | bi  | 1 | <a href="#">2701</a> |
| 1 | <a href="#">3081</a> | 329  | bi  | 1 | <a href="#">352</a> | bi  | 1 | <a href="#">2888</a> | bi  | 1 | <a href="#">2485</a> | bi  | 1 | <a href="#">2702</a> |
| 1 | <a href="#">3082</a> | 49   | -   |   |                     | -   |   |                      | bi  | 1 | <a href="#">2486</a> | -   |   |                      |
| 1 | <a href="#">3083</a> | 591  | bi  | 1 | <a href="#">353</a> | bi  | 1 | <a href="#">2890</a> | bi  | 1 | <a href="#">2487</a> | bi  | 1 | <a href="#">2703</a> |
| 1 | <a href="#">3084</a> | 226  | bi  | 1 | <a href="#">354</a> | bi  | 1 | <a href="#">2891</a> | bi  | 1 | <a href="#">2488</a> | bi  | 1 | <a href="#">2704</a> |

|   |                      |      |     |   |                      |     |   |                      |     |   |                      |     |   |                      |
|---|----------------------|------|-----|---|----------------------|-----|---|----------------------|-----|---|----------------------|-----|---|----------------------|
| 1 | <a href="#">3085</a> | 119  | bi  | 1 | <a href="#">355</a>  | bi  | 1 | <a href="#">2892</a> | bi  | 1 | <a href="#">2489</a> | bi  | 1 | <a href="#">2705</a> |
| 1 | <a href="#">3086</a> | 332  | bi  | 1 | <a href="#">356</a>  | bi  | 1 | <a href="#">2893</a> | bi  | 1 | <a href="#">2490</a> | bi  | 1 | <a href="#">2706</a> |
| 1 | <a href="#">3087</a> | 185  | bi  | 1 | <a href="#">357</a>  | bi  | 1 | <a href="#">2894</a> | bi  | 1 | <a href="#">2491</a> | bi  | 1 | <a href="#">2707</a> |
| 1 | <a href="#">3088</a> | 162  | bi  | 1 | <a href="#">358</a>  | bi  | 1 | <a href="#">2895</a> | bi  | 1 | <a href="#">2492</a> | bi  | 1 | <a href="#">2708</a> |
| 1 | <a href="#">3089</a> | 621  | bi  | 1 | <a href="#">359</a>  | bi  | 1 | <a href="#">2896</a> | bi  | 1 | <a href="#">2493</a> | bi  | 1 | <a href="#">2709</a> |
| 1 | <a href="#">3090</a> | 267  | bi  | 1 | <a href="#">360</a>  | bi  | 1 | <a href="#">2897</a> | bi  | 1 | <a href="#">2494</a> | bi  | 1 | <a href="#">2710</a> |
| 1 | <a href="#">3091</a> | 633  | bi  | 1 | <a href="#">361</a>  | bi  | 1 | <a href="#">2898</a> | bi  | 1 | <a href="#">2495</a> | bi  | 1 | <a href="#">2711</a> |
| 1 | <a href="#">3092</a> | 466  | bi  | 1 | <a href="#">362</a>  | bi  | 1 | <a href="#">2899</a> | bi  | 1 | <a href="#">2496</a> | bi  | 1 | <a href="#">2712</a> |
| 1 | <a href="#">3093</a> | 35   | -   |   |                      | -   |   |                      | -   |   |                      | -   |   |                      |
| 1 | <a href="#">3094</a> | 1745 | bi  | 1 | <a href="#">363</a>  | bi  | 1 | <a href="#">2900</a> | bi  | 1 | <a href="#">2497</a> | bi  | 1 | <a href="#">2713</a> |
| 1 | <a href="#">3095</a> | 290  | bi  | 1 | <a href="#">365</a>  | bi  | 1 | <a href="#">2902</a> | bi  | 1 | <a href="#">2499</a> | bi  | 1 | <a href="#">2715</a> |
| 1 | <a href="#">3096</a> | 391  | bi  | 1 | <a href="#">366</a>  | bi  | 1 | <a href="#">2903</a> | bi  | 1 | <a href="#">2500</a> | bi  | 1 | <a href="#">2716</a> |
| 1 | <a href="#">3097</a> | 466  | bi  | 1 | <a href="#">367</a>  | bi  | 1 | <a href="#">2904</a> | bi  | 1 | <a href="#">2501</a> | bi  | 1 | <a href="#">2717</a> |
| 1 | <a href="#">3098</a> | 179  | bi  | 1 | <a href="#">368</a>  | bi  | 1 | <a href="#">2905</a> | bi  | 1 | <a href="#">2502</a> | bi  | 1 | <a href="#">2718</a> |
| 1 | <a href="#">3099</a> | 471  | bi  | 1 | <a href="#">369</a>  | bi  | 1 | <a href="#">2906</a> | bi  | 1 | <a href="#">2503</a> | bi  | 1 | <a href="#">2719</a> |
| 1 | <a href="#">3100</a> | 296  | bi  | 1 | <a href="#">370</a>  | bi  | 1 | <a href="#">2907</a> | bi  | 1 | <a href="#">2504</a> | bi  | 1 | <a href="#">2720</a> |
| 1 | <a href="#">3101</a> | 103  | bi  | 1 | <a href="#">371</a>  | bi  | 1 | <a href="#">2908</a> | bi  | 1 | <a href="#">2505</a> | bi  | 1 | <a href="#">2721</a> |
| 1 | <a href="#">3102</a> | 337  | bi  | 1 | <a href="#">372</a>  | bi  | 1 | <a href="#">2909</a> | bi  | 1 | <a href="#">2506</a> | bi  | 1 | <a href="#">2722</a> |
| 1 | <a href="#">3103</a> | 45   | bi  | 1 | <a href="#">373</a>  | bi  | 1 | <a href="#">2910</a> | bi  | 1 | <a href="#">2507</a> | bi  | 1 | <a href="#">2723</a> |
| 1 | <a href="#">3104</a> | 362  | bi  | 1 | <a href="#">374</a>  | bi  | 1 | <a href="#">2911</a> | bi  | 1 | <a href="#">2508</a> | bi  | 1 | <a href="#">2724</a> |
| 1 | <a href="#">3105</a> | 134  | bi  | 1 | <a href="#">375</a>  | bi  | 1 | <a href="#">2912</a> | bi  | 1 | <a href="#">2509</a> | bi  | 1 | <a href="#">2725</a> |
| 1 | <a href="#">3106</a> | 121  | bi  | 1 | <a href="#">376</a>  | bi  | 1 | <a href="#">2913</a> | bi  | 1 | <a href="#">2510</a> | bi  | 1 | <a href="#">2726</a> |
| 1 | <a href="#">3107</a> | 466  | bi  | 1 | <a href="#">377</a>  | bi  | 1 | <a href="#">2914</a> | bi  | 1 | <a href="#">2511</a> | bi  | 1 | <a href="#">2727</a> |
| 1 | <a href="#">3108</a> | 232  | bi  | 1 | <a href="#">378</a>  | bi  | 1 | <a href="#">2915</a> | bi  | 1 | <a href="#">2512</a> | bi  | 1 | <a href="#">2728</a> |
| 1 | <a href="#">3109</a> | 241  | bi  | 1 | <a href="#">379</a>  | bi  | 1 | <a href="#">2916</a> | bi  | 1 | <a href="#">2513</a> | bi  | 1 | <a href="#">2729</a> |
| 1 | <a href="#">3110</a> | 259  | bi  | 1 | <a href="#">380</a>  | bi  | 1 | <a href="#">2924</a> | bi  | 1 | <a href="#">2514</a> | bi  | 1 | <a href="#">2730</a> |
| 1 | <a href="#">3111</a> | 276  | bi  | 1 | <a href="#">381</a>  | bi  | 1 | <a href="#">2925</a> | bi  | 1 | <a href="#">2515</a> | bi  | 1 | <a href="#">2731</a> |
| 1 | <a href="#">3112</a> | 119  | bi  | 1 | <a href="#">382</a>  | bi  | 1 | <a href="#">2926</a> | bi  | 1 | <a href="#">2516</a> | bi  | 1 | <a href="#">2732</a> |
| 1 | <a href="#">3113</a> | 45   | bi  | 1 | <a href="#">383</a>  | bi  | 1 | <a href="#">2927</a> | bi  | 1 | <a href="#">2517</a> | bi  | 1 | <a href="#">2733</a> |
| 2 | <a href="#">3114</a> | 337  | uni | 4 | <a href="#">2995</a> | bi  | 1 | <a href="#">1891</a> | -   |   |                      | -   |   |                      |
| 2 | <a href="#">3115</a> | 389  | uni | 3 | <a href="#">2935</a> | -   |   |                      | -   |   |                      | -   |   |                      |
| 2 | <a href="#">3116</a> | 544  | uni | 3 | <a href="#">2934</a> | uni | 1 | <a href="#">2652</a> | uni | 1 | <a href="#">2259</a> | uni | 1 | <a href="#">2476</a> |
| 2 | <a href="#">3117</a> | 320  | bi  | 4 | <a href="#">2992</a> | uni | 1 | <a href="#">69</a>   | uni | 1 | <a href="#">63</a>   | uni | 1 | <a href="#">69</a>   |
| 2 | <a href="#">3118</a> | 23   | -   |   |                      | -   |   |                      | -   |   |                      | -   |   |                      |
| 2 | <a href="#">3119</a> | 229  | bi  | 1 | <a href="#">2520</a> | uni | 2 | <a href="#">2938</a> | -   |   |                      | bi  | 1 | <a href="#">372</a>  |
| 2 | <a href="#">3120</a> | 246  | uni | 1 | <a href="#">1275</a> | bi  | 2 | <a href="#">2933</a> | uni | 1 | <a href="#">644</a>  | uni | 1 | <a href="#">761</a>  |
| 2 | <a href="#">3121</a> | 229  | uni | 1 | <a href="#">2520</a> | uni | 2 | <a href="#">2938</a> | -   |   |                      | uni | 1 | <a href="#">372</a>  |
| 2 | <a href="#">3122</a> | 108  | uni | 1 | <a href="#">667</a>  | uni | 1 | <a href="#">300</a>  | uni | 1 | <a href="#">246</a>  | uni | 1 | <a href="#">247</a>  |
| 2 | <a href="#">3123</a> | 296  | -   |   |                      | -   |   |                      | -   |   |                      | -   |   |                      |
| 2 | <a href="#">3124</a> | 229  | uni | 1 | <a href="#">2520</a> | uni | 2 | <a href="#">2938</a> | -   |   |                      | uni | 1 | <a href="#">372</a>  |
| 2 | <a href="#">3125</a> | 164  | -   |   |                      | -   |   |                      | -   |   |                      | -   |   |                      |
| 2 | <a href="#">3126</a> | 45   | -   |   |                      | -   |   |                      | -   |   |                      | -   |   |                      |
| 2 | <a href="#">3127</a> | 230  | uni | 1 | <a href="#">798</a>  | uni | 2 | <a href="#">2938</a> | -   |   |                      | uni | 1 | <a href="#">410</a>  |
| 2 | <a href="#">3128</a> | 81   | uni | 1 | <a href="#">304</a>  | uni | 1 | <a href="#">2833</a> | -   |   |                      | uni | 1 | <a href="#">2586</a> |
| 2 | <a href="#">3129</a> | 159  | uni | 4 | <a href="#">3017</a> | uni | 1 | <a href="#">8</a>    | uni | 1 | <a href="#">8</a>    | uni | 1 | <a href="#">8</a>    |
| 2 | <a href="#">3358</a> | 317  | uni | 3 | <a href="#">2964</a> | -   |   |                      | -   |   |                      | uni | 1 | <a href="#">373</a>  |
| 2 | <a href="#">3130</a> | 252  | uni | 3 | <a href="#">2965</a> | -   |   |                      | -   |   |                      | -   |   |                      |
| 2 | <a href="#">3131</a> | 89   | -   |   |                      | -   |   |                      | -   |   |                      | -   |   |                      |
| 2 | <a href="#">3132</a> | 163  | uni | 4 | <a href="#">3021</a> | -   |   |                      | -   |   |                      | -   |   |                      |
| 2 | <a href="#">3133</a> | 262  | uni | 4 | <a href="#">3022</a> | -   |   |                      | -   |   |                      | -   |   |                      |
| 2 | <a href="#">3134</a> | 54   | -   |   |                      | -   |   |                      | -   |   |                      | -   |   |                      |
| 2 | <a href="#">3135</a> | 80   | -   |   |                      | -   |   |                      | -   |   |                      | -   |   |                      |
| 2 | <a href="#">3136</a> | 48   | -   |   |                      | -   |   |                      | -   |   |                      | -   |   |                      |
| 2 | <a href="#">3137</a> | 738  | uni | 4 | <a href="#">3024</a> | -   |   |                      | -   |   |                      | -   |   |                      |
| 2 | <a href="#">3138</a> | 782  | uni | 4 | <a href="#">3025</a> | -   |   |                      | -   |   |                      | -   |   |                      |
| 2 | <a href="#">3139</a> | 114  | bi  | 4 | <a href="#">3027</a> | -   |   |                      | -   |   |                      | -   |   |                      |
| 2 | <a href="#">3140</a> | 831  | uni | 4 | <a href="#">3028</a> | -   |   |                      | uni | 1 | <a href="#">780</a>  | -   |   |                      |

|   |                      |      |     |   |                      |     |   |                      |     |   |                      |     |   |                      |
|---|----------------------|------|-----|---|----------------------|-----|---|----------------------|-----|---|----------------------|-----|---|----------------------|
| 2 | <a href="#">3141</a> | 153  | bi  | 4 | <a href="#">3030</a> | uni | 1 | <a href="#">1948</a> | uni | 1 | <a href="#">8</a>    | uni | 1 | <a href="#">8</a>    |
| 2 | <a href="#">3142</a> | 134  | bi  | 4 | <a href="#">3031</a> | -   |   |                      | -   |   |                      | -   |   |                      |
| 2 | <a href="#">3143</a> | 92   | bi  | 4 | <a href="#">3032</a> | -   |   |                      | -   |   |                      | -   |   |                      |
| 2 | <a href="#">3144</a> | 345  | bi  | 4 | <a href="#">3033</a> | -   |   |                      | -   |   |                      | -   |   |                      |
| 2 | <a href="#">3145</a> | 105  | bi  | 4 | <a href="#">3034</a> | -   |   |                      | -   |   |                      | -   |   |                      |
| 2 | <a href="#">3146</a> | 139  | bi  | 4 | <a href="#">3035</a> | -   |   |                      | -   |   |                      | -   |   |                      |
| 2 | <a href="#">3147</a> | 206  | bi  | 4 | <a href="#">3036</a> | -   |   |                      | -   |   |                      | -   |   |                      |
| 2 | <a href="#">3148</a> | 424  | bi  | 4 | <a href="#">3037</a> | uni | 1 | <a href="#">1563</a> | uni | 1 | <a href="#">1486</a> | uni | 1 | <a href="#">193</a>  |
| 2 | <a href="#">3149</a> | 287  | bi  | 4 | <a href="#">3038</a> | -   |   |                      | -   |   |                      | uni | 1 | <a href="#">395</a>  |
| 2 | <a href="#">3150</a> | 293  | bi  | 4 | <a href="#">3039</a> | -   |   |                      | -   |   |                      | uni | 1 | <a href="#">394</a>  |
| 2 | <a href="#">3151</a> | 87   | bi  | 4 | <a href="#">3040</a> | -   |   |                      | -   |   |                      | -   |   |                      |
| 2 | <a href="#">3152</a> | 129  | bi  | 4 | <a href="#">3041</a> | -   |   |                      | -   |   |                      | -   |   |                      |
| 2 | <a href="#">3153</a> | 118  | bi  | 4 | <a href="#">3042</a> | -   |   |                      | -   |   |                      | uni | 1 | <a href="#">396</a>  |
| 2 | <a href="#">3154</a> | 1297 | uni | 4 | <a href="#">3043</a> | -   |   |                      | -   |   |                      | uni | 1 | <a href="#">397</a>  |
| 2 | <a href="#">3155</a> | 112  | bi  | 4 | <a href="#">3044</a> | bi  | 3 | <a href="#">2953</a> | -   |   |                      | -   |   |                      |
| 2 | <a href="#">3156</a> | 31   | -   |   |                      | -   |   |                      | -   |   |                      | -   |   |                      |
| 2 | <a href="#">3157</a> | 62   | -   |   |                      | -   |   |                      | -   |   |                      | -   |   |                      |
| 2 | <a href="#">3158</a> | 891  | bi  | 4 | <a href="#">3045</a> | -   |   |                      | -   |   |                      | -   |   |                      |
| 2 | <a href="#">3159</a> | 102  | bi  | 3 | <a href="#">2938</a> | uni | 1 | <a href="#">1852</a> | -   |   |                      | -   |   |                      |
| 2 | <a href="#">3160</a> | 119  | -   |   |                      | bi  | 3 | <a href="#">2945</a> | -   |   |                      | -   |   |                      |
| 2 | <a href="#">3161</a> | 229  | uni | 1 | <a href="#">2520</a> | uni | 2 | <a href="#">2938</a> | -   |   |                      | uni | 1 | <a href="#">372</a>  |
| 2 | <a href="#">3162</a> | 47   | -   |   |                      | bi  | 2 | <a href="#">2941</a> | -   |   |                      | -   |   |                      |
| 2 | <a href="#">3163</a> | 497  | -   |   |                      | bi  | 2 | <a href="#">2928</a> | -   |   |                      | -   |   |                      |
| 2 | <a href="#">3164</a> | 391  | uni | 1 | <a href="#">2146</a> | -   |   |                      | -   |   |                      | uni | 1 | <a href="#">1007</a> |
| 2 | <a href="#">3165</a> | 131  | -   |   |                      | uni | 1 | <a href="#">188</a>  | uni | 1 | <a href="#">185</a>  | uni | 1 | <a href="#">185</a>  |
| 2 | <a href="#">3166</a> | 480  | -   |   |                      | -   |   |                      | -   |   |                      | -   |   |                      |
| 2 | <a href="#">3167</a> | 391  | uni | 1 | <a href="#">2146</a> | -   |   |                      | -   |   |                      | uni | 1 | <a href="#">1007</a> |
| 2 | <a href="#">3168</a> | 229  | uni | 1 | <a href="#">2520</a> | uni | 2 | <a href="#">2938</a> | -   |   |                      | uni | 1 | <a href="#">372</a>  |
| 2 | <a href="#">3169</a> | 115  | -   |   |                      | bi  | 3 | <a href="#">3007</a> | -   |   |                      | -   |   |                      |
| 2 | <a href="#">3170</a> | 90   | -   |   |                      | -   |   |                      | -   |   |                      | -   |   |                      |
| 2 | <a href="#">3171</a> | 644  | uni | 1 | <a href="#">1921</a> | uni | 1 | <a href="#">1353</a> | uni | 1 | <a href="#">1279</a> | uni | 1 | <a href="#">1355</a> |
| 2 | <a href="#">3172</a> | 480  | uni | 1 | <a href="#">1923</a> | uni | 1 | <a href="#">1355</a> | uni | 1 | <a href="#">1281</a> | uni | 1 | <a href="#">1357</a> |
| 2 | <a href="#">3173</a> | 321  | uni | 1 | <a href="#">1924</a> | uni | 1 | <a href="#">1356</a> | uni | 1 | <a href="#">1282</a> | uni | 1 | <a href="#">1358</a> |
| 2 | <a href="#">3174</a> | 121  | uni | 1 | <a href="#">1188</a> | uni | 1 | <a href="#">1873</a> | uni | 1 | <a href="#">563</a>  | uni | 1 | <a href="#">677</a>  |
| 2 | <a href="#">3175</a> | 88   | -   |   |                      | -   |   |                      | -   |   |                      | -   |   |                      |
| 2 | <a href="#">3176</a> | 199  | bi  | 4 | <a href="#">3005</a> | bi  | 3 | <a href="#">3008</a> | uni | 1 | <a href="#">140</a>  | bi  | 1 | <a href="#">456</a>  |
| 2 | <a href="#">3177</a> | 96   | bi  | 1 | <a href="#">854</a>  | bi  | 3 | <a href="#">3009</a> | -   |   |                      | -   |   |                      |
| 2 | <a href="#">3178</a> | 83   | bi  | 3 | <a href="#">2983</a> | -   |   |                      | -   |   |                      | -   |   |                      |
| 2 | <a href="#">3179</a> | 101  | bi  | 3 | <a href="#">2984</a> | -   |   |                      | -   |   |                      | -   |   |                      |
| 2 | <a href="#">3180</a> | 443  | bi  | 3 | <a href="#">2985</a> | uni | 3 | <a href="#">3017</a> | uni | 1 | <a href="#">832</a>  | uni | 1 | <a href="#">905</a>  |
| 2 | <a href="#">3181</a> | 117  | -   |   |                      | -   |   |                      | -   |   |                      | uni | 1 | <a href="#">2332</a> |
| 2 | <a href="#">3182</a> | 61   | uni | 4 | <a href="#">3003</a> | -   |   |                      | -   |   |                      | -   |   |                      |
| 2 | <a href="#">3183</a> | 154  | -   |   |                      | -   |   |                      | -   |   |                      | -   |   |                      |
| 2 | <a href="#">3359</a> | 97   | uni | 3 | <a href="#">2987</a> | -   |   |                      | -   |   |                      | -   |   |                      |
| 2 | <a href="#">3184</a> | 124  | -   |   |                      | -   |   |                      | -   |   |                      | -   |   |                      |
| 2 | <a href="#">3185</a> | 282  | bi  | 1 | <a href="#">822</a>  | uni | 3 | <a href="#">3019</a> | uni | 1 | <a href="#">2483</a> | bi  | 1 | <a href="#">435</a>  |
| 3 | <a href="#">3186</a> | 439  | bi  | 3 | <a href="#">2934</a> | uni | 1 | <a href="#">2652</a> | uni | 1 | <a href="#">2259</a> | uni | 1 | <a href="#">2476</a> |
| 3 | <a href="#">3187</a> | 229  | uni | 1 | <a href="#">2520</a> | uni | 2 | <a href="#">2938</a> | -   |   |                      | uni | 1 | <a href="#">372</a>  |
| 3 | <a href="#">3360</a> | 140  | -   |   |                      | -   |   |                      | -   |   |                      | -   |   |                      |
| 3 | <a href="#">3188</a> | 391  | uni | 1 | <a href="#">2146</a> | -   |   |                      | -   |   |                      | uni | 1 | <a href="#">1007</a> |
| 3 | <a href="#">3189</a> | 613  | -   |   |                      | -   |   |                      | -   |   |                      | -   |   |                      |
| 3 | <a href="#">3190</a> | 352  | uni | 1 | <a href="#">1476</a> | uni | 3 | <a href="#">3017</a> | uni | 1 | <a href="#">832</a>  | uni | 1 | <a href="#">905</a>  |
| 3 | <a href="#">3191</a> | 229  | uni | 1 | <a href="#">2520</a> | uni | 2 | <a href="#">2938</a> | -   |   |                      | uni | 1 | <a href="#">372</a>  |
| 3 | <a href="#">3192</a> | 101  | -   |   |                      | -   |   |                      | -   |   |                      | -   |   |                      |
| 3 | <a href="#">3193</a> | 199  | uni | 4 | <a href="#">3005</a> | uni | 3 | <a href="#">3008</a> | uni | 1 | <a href="#">140</a>  | uni | 1 | <a href="#">456</a>  |
| 3 | <a href="#">3194</a> | 95   | uni | 4 | <a href="#">3004</a> | uni | 3 | <a href="#">3009</a> | -   |   |                      | -   |   |                      |
| 3 | <a href="#">3195</a> | 70   | bi  | 3 | <a href="#">2982</a> | -   |   |                      | -   |   |                      | -   |   |                      |

|   |                      |      |     |   |                      |     |   |                      |     |   |                      |     |   |                      |
|---|----------------------|------|-----|---|----------------------|-----|---|----------------------|-----|---|----------------------|-----|---|----------------------|
| 3 | <a href="#">3196</a> | 75   | -   |   |                      | -   |   |                      | -   |   |                      | -   |   |                      |
| 3 | <a href="#">3197</a> | 52   | -   |   |                      | -   |   |                      | -   |   |                      | -   |   |                      |
| 3 | <a href="#">3198</a> | 84   | -   |   |                      | -   |   |                      | -   |   |                      | -   |   |                      |
| 3 | <a href="#">3199</a> | 439  | uni | 3 | <a href="#">2985</a> | uni | 3 | <a href="#">3017</a> | uni | 1 | <a href="#">832</a>  | uni | 1 | <a href="#">905</a>  |
| 3 | <a href="#">3200</a> | 169  | uni | 4 | <a href="#">2999</a> | bi  | 1 | <a href="#">2258</a> | uni | 1 | <a href="#">833</a>  | bi  | 1 | <a href="#">2332</a> |
| 3 | <a href="#">3201</a> | 138  | -   |   |                      | bi  | 3 | <a href="#">3018</a> | -   |   |                      | -   |   |                      |
| 3 | <a href="#">3202</a> | 274  | uni | 1 | <a href="#">822</a>  | bi  | 3 | <a href="#">3019</a> | uni | 1 | <a href="#">2483</a> | uni | 1 | <a href="#">367</a>  |
| 3 | <a href="#">3203</a> | 502  | -   |   |                      | bi  | 3 | <a href="#">2942</a> | -   |   |                      | -   |   |                      |
| 4 | <a href="#">3204</a> | 337  | bi  | 4 | <a href="#">2995</a> | uni | 1 | <a href="#">1891</a> | -   |   |                      | -   |   |                      |
| 4 | <a href="#">3205</a> | 386  | bi  | 3 | <a href="#">2935</a> | -   |   |                      | -   |   |                      | -   |   |                      |
| 4 | <a href="#">3206</a> | 530  | uni | 3 | <a href="#">2934</a> | uni | 1 | <a href="#">727</a>  | uni | 1 | <a href="#">616</a>  | uni | 1 | <a href="#">732</a>  |
| 4 | <a href="#">3207</a> | 314  | bi  | 3 | <a href="#">2936</a> | uni | 1 | <a href="#">69</a>   | uni | 1 | <a href="#">63</a>   | -   |   |                      |
| 4 | <a href="#">3208</a> | 26   | -   |   |                      | -   |   |                      | -   |   |                      | -   |   |                      |
| 4 | <a href="#">3209</a> | 127  | bi  | 3 | <a href="#">2937</a> | bi  | 1 | <a href="#">1996</a> | -   |   |                      | -   |   |                      |
| 4 | <a href="#">3210</a> | 63   | uni | 3 | <a href="#">2938</a> | -   |   |                      | -   |   |                      | -   |   |                      |
| 4 | <a href="#">3211</a> | 38   | uni | 3 | <a href="#">2938</a> | -   |   |                      | -   |   |                      | -   |   |                      |
| 4 | <a href="#">3212</a> | 892  | uni | 4 | <a href="#">3045</a> | -   |   |                      | -   |   |                      | -   |   |                      |
| 4 | <a href="#">3213</a> | 1306 | bi  | 3 | <a href="#">2942</a> | -   |   |                      | -   |   |                      | bi  | 1 | <a href="#">397</a>  |
| 4 | <a href="#">3361</a> | 119  | bi  | 3 | <a href="#">2943</a> | -   |   |                      | -   |   |                      | bi  | 1 | <a href="#">396</a>  |
| 4 | <a href="#">3214</a> | 286  | bi  | 3 | <a href="#">2944</a> | -   |   |                      | -   |   |                      | bi  | 1 | <a href="#">395</a>  |
| 4 | <a href="#">3215</a> | 300  | bi  | 3 | <a href="#">2945</a> | -   |   |                      | -   |   |                      | bi  | 1 | <a href="#">394</a>  |
| 4 | <a href="#">3216</a> | 145  | bi  | 3 | <a href="#">2946</a> | -   |   |                      | -   |   |                      | bi  | 1 | <a href="#">393</a>  |
| 4 | <a href="#">3217</a> | 76   | bi  | 3 | <a href="#">2947</a> | -   |   |                      | -   |   |                      | bi  | 1 | <a href="#">392</a>  |
| 4 | <a href="#">3218</a> | 99   | bi  | 3 | <a href="#">2948</a> | -   |   |                      | -   |   |                      | bi  | 1 | <a href="#">391</a>  |
| 4 | <a href="#">3219</a> | 267  | bi  | 3 | <a href="#">2949</a> | -   |   |                      | -   |   |                      | bi  | 1 | <a href="#">389</a>  |
| 4 | <a href="#">3220</a> | 118  | bi  | 3 | <a href="#">2950</a> | -   |   |                      | -   |   |                      | bi  | 1 | <a href="#">388</a>  |
| 4 | <a href="#">3221</a> | 746  | bi  | 3 | <a href="#">2951</a> | -   |   |                      | -   |   |                      | bi  | 1 | <a href="#">387</a>  |
| 4 | <a href="#">3222</a> | 872  | bi  | 3 | <a href="#">2952</a> | uni | 1 | <a href="#">1980</a> | uni | 1 | <a href="#">1486</a> | bi  | 1 | <a href="#">386</a>  |
| 4 | <a href="#">3223</a> | 209  | bi  | 3 | <a href="#">2953</a> | -   |   |                      | -   |   |                      | bi  | 1 | <a href="#">385</a>  |
| 4 | <a href="#">3224</a> | 85   | bi  | 3 | <a href="#">2954</a> | -   |   |                      | -   |   |                      | bi  | 1 | <a href="#">384</a>  |
| 4 | <a href="#">3225</a> | 203  | bi  | 3 | <a href="#">2955</a> | -   |   |                      | -   |   |                      | bi  | 1 | <a href="#">383</a>  |
| 4 | <a href="#">3226</a> | 163  | bi  | 3 | <a href="#">2956</a> | -   |   |                      | -   |   |                      | bi  | 1 | <a href="#">382</a>  |
| 4 | <a href="#">3227</a> | 611  | bi  | 3 | <a href="#">2957</a> | bi  | 1 | <a href="#">1969</a> | -   |   |                      | bi  | 1 | <a href="#">381</a>  |
| 4 | <a href="#">3228</a> | 720  | bi  | 3 | <a href="#">2958</a> | bi  | 3 | <a href="#">2982</a> | -   |   |                      | bi  | 1 | <a href="#">378</a>  |
| 4 | <a href="#">3229</a> | 91   | bi  | 3 | <a href="#">2959</a> | -   |   |                      | -   |   |                      | bi  | 1 | <a href="#">377</a>  |
| 4 | <a href="#">3230</a> | 119  | bi  | 3 | <a href="#">2960</a> | -   |   |                      | -   |   |                      | bi  | 1 | <a href="#">376</a>  |
| 4 | <a href="#">3231</a> | 562  | bi  | 3 | <a href="#">2961</a> | -   |   |                      | -   |   |                      | bi  | 1 | <a href="#">375</a>  |
| 4 | <a href="#">3232</a> | 110  | bi  | 3 | <a href="#">2962</a> | -   |   |                      | -   |   |                      | bi  | 1 | <a href="#">374</a>  |
| 4 | <a href="#">3233</a> | 56   | bi  | 3 | <a href="#">2963</a> | -   |   |                      | -   |   |                      | -   |   |                      |
| 4 | <a href="#">3234</a> | 448  | bi  | 3 | <a href="#">2964</a> | -   |   |                      | -   |   |                      | bi  | 1 | <a href="#">373</a>  |
| 4 | <a href="#">3235</a> | 259  | bi  | 3 | <a href="#">2965</a> | -   |   |                      | -   |   |                      | -   |   |                      |
| 4 | <a href="#">3236</a> | 183  | bi  | 3 | <a href="#">2966</a> | -   |   |                      | -   |   |                      | -   |   |                      |
| 4 | <a href="#">3237</a> | 58   | bi  | 3 | <a href="#">2967</a> | -   |   |                      | -   |   |                      | -   |   |                      |
| 4 | <a href="#">3238</a> | 62   | bi  | 3 | <a href="#">2968</a> | -   |   |                      | -   |   |                      | -   |   |                      |
| 4 | <a href="#">3239</a> | 150  | bi  | 3 | <a href="#">2969</a> | -   |   |                      | -   |   |                      | -   |   |                      |
| 4 | <a href="#">3240</a> | 67   | bi  | 3 | <a href="#">2970</a> | -   |   |                      | -   |   |                      | -   |   |                      |
| 4 | <a href="#">3241</a> | 77   | bi  | 3 | <a href="#">2971</a> | bi  | 3 | <a href="#">2995</a> | -   |   |                      | -   |   |                      |
| 4 | <a href="#">3242</a> | 165  | bi  | 3 | <a href="#">2972</a> | -   |   |                      | -   |   |                      | -   |   |                      |
| 4 | <a href="#">3243</a> | 151  | bi  | 3 | <a href="#">2973</a> | bi  | 1 | <a href="#">1948</a> | uni | 1 | <a href="#">8</a>    | uni | 1 | <a href="#">8</a>    |
| 4 | <a href="#">3244</a> | 51   | bi  | 3 | <a href="#">2974</a> | -   |   |                      | -   |   |                      | -   |   |                      |
| 4 | <a href="#">3245</a> | 193  | bi  | 3 | <a href="#">2975</a> | uni | 1 | <a href="#">1946</a> | -   |   |                      | -   |   |                      |
| 4 | <a href="#">3246</a> | 110  | -   |   |                      | -   |   |                      | -   |   |                      | -   |   |                      |
| 4 | <a href="#">3247</a> | 487  | bi  | 3 | <a href="#">2976</a> | uni | 1 | <a href="#">1749</a> | uni | 1 | <a href="#">1638</a> | uni | 1 | <a href="#">1746</a> |
| 4 | <a href="#">3248</a> | 82   | -   |   |                      | -   |   |                      | -   |   |                      | bi  | 1 | <a href="#">2675</a> |
| 4 | <a href="#">3249</a> | 447  | uni | 1 | <a href="#">2409</a> | uni | 1 | <a href="#">1773</a> | uni | 1 | <a href="#">1665</a> | uni | 1 | <a href="#">1770</a> |
| 4 | <a href="#">3250</a> | 701  | uni | 4 | <a href="#">3008</a> | uni | 1 | <a href="#">1478</a> | uni | 1 | <a href="#">1403</a> | uni | 1 | <a href="#">1487</a> |
| 4 | <a href="#">3251</a> | 430  | -   |   |                      | -   |   |                      | -   |   |                      | -   |   |                      |

|   |                      |     |     |   |                      |     |   |                      |     |   |                      |     |   |                      |
|---|----------------------|-----|-----|---|----------------------|-----|---|----------------------|-----|---|----------------------|-----|---|----------------------|
| 4 | <a href="#">3252</a> | 391 | uni | 1 | <a href="#">2146</a> | -   |   |                      | -   |   |                      | uni | 1 | <a href="#">1007</a> |
| 4 | <a href="#">3253</a> | 125 | -   |   |                      | -   |   |                      | -   |   |                      | -   |   |                      |
| 4 | <a href="#">3254</a> | 135 | uni | 1 | <a href="#">1083</a> | uni | 1 | <a href="#">555</a>  | uni | 1 | <a href="#">455</a>  | uni | 1 | <a href="#">576</a>  |
| 4 | <a href="#">3255</a> | 165 | -   |   |                      | -   |   |                      | -   |   |                      | -   |   |                      |
| 4 | <a href="#">3256</a> | 75  | -   |   |                      | -   |   |                      | -   |   |                      | -   |   |                      |
| 4 | <a href="#">3257</a> | 112 | uni | 1 | <a href="#">1095</a> | uni | 1 | <a href="#">566</a>  | uni | 1 | <a href="#">467</a>  | uni | 1 | <a href="#">587</a>  |
| 4 | <a href="#">3258</a> | 202 | uni | 1 | <a href="#">843</a>  | bi  | 2 | <a href="#">2930</a> | uni | 1 | <a href="#">140</a>  | uni | 1 | <a href="#">456</a>  |
| 4 | <a href="#">3259</a> | 631 | bi  | 1 | <a href="#">901</a>  | -   |   |                      | -   |   |                      | -   |   |                      |
| 4 | <a href="#">3260</a> | 439 | uni | 3 | <a href="#">2985</a> | bi  | 3 | <a href="#">3017</a> | uni | 1 | <a href="#">832</a>  | uni | 1 | <a href="#">905</a>  |
| 4 | <a href="#">3261</a> | 169 | bi  | 4 | <a href="#">2999</a> | uni | 1 | <a href="#">2258</a> | uni | 1 | <a href="#">833</a>  | uni | 1 | <a href="#">2332</a> |
| 4 | <a href="#">3262</a> | 68  | -   |   |                      | -   |   |                      | -   |   |                      | -   |   |                      |
| 4 | <a href="#">3263</a> | 99  | bi  | 3 | <a href="#">2987</a> | -   |   |                      | -   |   |                      | -   |   |                      |
| 4 | <a href="#">3264</a> | 261 | bi  | 4 | <a href="#">2997</a> | uni | 1 | <a href="#">2886</a> | uni | 1 | <a href="#">2483</a> | uni | 1 | <a href="#">2700</a> |
| 4 | <a href="#">3265</a> | 119 | bi  | 4 | <a href="#">2996</a> | -   |   |                      | -   |   |                      | -   |   |                      |
